# Supplementary material for: Transcriptomic changes across the life cycle of Trypanosoma cruzi II
Source: PeerJ. 2020 May 14;8:e8947. doi: 10.7717/peerj.8947 (PMC7231504; doi:10.7717/peerj.8947)
Supplement: Supplemental Information 3 — Down-regulated and up-regulated DEGs I metacyclic trypomastigotes (MTs) compared to epimastigotes (EPs) and metacyclic trypomastigotes (MTs) compared to procyclic trypomastigotes (PTs) using the cuffdiff tool in Cufflinks. (xlsx) [file peerj-08-8947-s003.xlsx]

## Sheet: DOWN-DCT
test_id	gene_id	gene	locus	sample_1	sample_2	status	value_1	value_2	log2(fold_change)	test_stat	p_value	q_value	significant
XLOC_008191	XLOC_008191	TcSYL_0140690	TcX10_chr26:497042-498087	DCT	TM	OK	945394	121738	-2.95714	-1.00064	5e-05	0.000105404	yes
XLOC_000200	XLOC_000200	TcSYL_0004120	TcX10_chr1:1100965-1101587	DCT	TM	OK	1348.74	136.879	-3.30064	-1.02772	5e-05	0.000105404	yes
XLOC_012278	XLOC_012278	TcSYL_0174780	TcX10_chr37:463952-465147	DCT	TM	OK	108019	85470.4	-0.337789	-1.03055	0.03615	0.049833	yes
XLOC_008395	XLOC_008395	TcSYL_0141730	TcX10_chr27:44452-45392	DCT	TM	OK	104446	80897.3	-0.368591	-1.03408	0.0355	0.0490084	yes
XLOC_011375	XLOC_011375	TcSYL_0164740	TcX10_chr34:394855-395096	DCT	TM	OK	246358	140726	-0.807873	-1.0369	0.03345	0.0463559	yes
XLOC_012170	XLOC_012170	TcSYL_0172670	TcX10_chr37:174782-175884	DCT	TM	OK	108433	85150.6	-0.348713	-1.04088	0.0361	0.0497731	yes
XLOC_004532	XLOC_004532	TcSYL_0112440	TcX10_chr16:1418750-1419507	DCT	TM	OK	204986	163134	-0.329467	-1.0417	0.0336	0.0465382	yes
XLOC_019867	XLOC_019867	TcSYL_0073530	TcX10_chr8:785247-785995	DCT	TM	OK	143.74	111.405	-0.367653	-1.04174	0.03485	0.0481638	yes
XLOC_005058	XLOC_005058	TcSYL_0115380	TcX10_chr19:313730-313971	DCT	TM	OK	262269	150347	-0.802747	-1.04615	0.03505	0.0484225	yes
XLOC_000624	XLOC_000624	TcSYL_0012630	TcX10_chr1:2448171-2449057	DCT	TM	OK	763766	658625	-3.5356	-1.04657	5e-05	0.000105404	yes
XLOC_004501	XLOC_004501	TcSYL_0112130	TcX10_chr16:1311238-1311905	DCT	TM	OK	123029	92837.6	-0.406213	-1.05136	0.03495	0.0482932	yes
XLOC_005283	XLOC_005283	TcSYL_0015830	TcX10_chr2:376176-376513	DCT	TM	OK	233183	164802	-0.500726	-1.05319	0.03425	0.0473778	yes
XLOC_016263	XLOC_016263	TcSYL_0196810	TcX10_chr43:160934-161712	DCT	TM	OK	195284	153995	-0.342694	-1.05484	0.034	0.0470664	yes
XLOC_001617	XLOC_001617	TcSYL_0082360	TcX10_chr10:558046-558881	DCT	TM	OK	393927	319693	-0.301243	-1.06068	0.0321	0.0446322	yes
XLOC_002784	XLOC_002784	TcSYL_0094800	TcX10_chr13:464745-465190	DCT	TM	OK	5805.19	678.551	-3.09681	-1.06455	5e-05	0.000105404	yes
XLOC_012523	XLOC_012523	TcSYL_0176270	TcX10_chr38:217236-217849	DCT	TM	OK	496512	321441	-0.627275	-1.06722	0.03035	0.0423468	yes
XLOC_000233	XLOC_000233	TcSYL_0004450	TcX10_chr1:1183775-1184517	DCT	TM	OK	365.64	294.819	-0.310593	-1.07065	0.03055	0.0426022	yes
XLOC_002549	XLOC_002549	TcSYL_0092320	TcX10_chr12:985570-986141	DCT	TM	OK	238288	184298	-0.370668	-1.07084	0.03105	0.0432437	yes
XLOC_013112	XLOC_013112	TcSYL_0179610	TcX10_chr39:117989-118608	DCT	TM	OK	115431	84686.9	-0.44682	-1.07186	0.03205	0.044579	yes
XLOC_001463	XLOC_001463	TcSYL_0014010	TcX10_chr1:2900514-2901577	DCT	TM	OK	125484	98398.5	-0.350795	-1.07357	0.0306	0.0426641	yes
XLOC_012249	XLOC_012249	TcSYL_0174490	TcX10_chr37:376194-377029	DCT	TM	OK	143865	111222	-0.371274	-1.07419	0.0296	0.0414915	yes
XLOC_008634	XLOC_008634	TcSYL_0145680	TcX10_chr28:347943-348268	DCT	TM	OK	249745	174028	-0.521133	-1.07591	0.02645	0.0374506	yes
XLOC_004575	XLOC_004575	TcSYL_0109260	TcX10_chr16:170158-170855	DCT	TM	OK	174702	134672	-0.375452	-1.08102	0.02775	0.0391302	yes
XLOC_017946	XLOC_017946	TcSYL_0058690	TcX10_chr6:1138775-1139049	DCT	TM	OK	179828	107832	-0.737837	-1.08248	0.03515	0.0485518	yes
XLOC_020348	XLOC_020348	TcSYL_0074680	TcX10_chr9:132942-133489	DCT	TM	OK	6313.91	5553.24	-3.50713	-1.08258	5e-05	0.000105404	yes
XLOC_004787	XLOC_004787	TcSYL_0114100	TcX10_chr18:524813-525150	DCT	TM	OK	371.99	275.087	-0.435377	-1.08377	0.0322	0.0447465	yes
XLOC_015466	XLOC_015466	TcSYL_0190240	TcX10_chr41:412945-413615	DCT	TM	OK	122189	91801.2	-0.412529	-1.08424	0.0333	0.0461819	yes
XLOC_004942	XLOC_004942	TcSYL_0115390	TcX10_chr19:332099-332577	DCT	TM	OK	309513	238471	-0.376183	-1.08454	0.03105	0.0432437	yes
XLOC_002176	XLOC_002176	TcSYL_0083990	TcX10_chr11:136189-137591	DCT	TM	OK	454965	335614	-0.438952	-1.08976	0.02955	0.0414522	yes
XLOC_002067	XLOC_002067	TcSYL_0088140	TcX10_chr11:871775-872754	DCT	TM	OK	254588	204532	-0.315834	-1.09025	0.0296	0.0414915	yes
XLOC_004088	XLOC_004088	TcSYL_0105800	TcX10_chr15:269816-271518	DCT	TM	OK	124067	992782	-0.32157	-1.09079	0.0285	0.0400907	yes
XLOC_010762	XLOC_010762	TcSYL_0159810	TcX10_chr32:878861-879939	DCT	TM	OK	849428	646465	-0.39392	-1.09346	0.0298	0.0417101	yes
XLOC_009645	XLOC_009645	TcSYL_0026630	TcX10_chr3:1050085-1050362	DCT	TM	OK	310652	208831	-0.572963	-1.09723	0.03205	0.044579	yes
XLOC_009209	XLOC_009209	TcSYL_0025510	TcX10_chr3:967368-967744	DCT	TM	OK	221.75	158.6	-0.483542	-1.09745	0.0336	0.0465382	yes
XLOC_003306	XLOC_003306	TcSYL_0098030	TcX10_chr13:781091-781692	DCT	TM	OK	159.71	119603	-0.417203	-1.09957	0.0274	0.0386655	yes
XLOC_004198	XLOC_004198	TcSYL_0107270	TcX10_chr15:613172-613527	DCT	TM	OK	741196	579267	-0.355625	-1.10021	0.02595	0.0367909	yes
XLOC_016633	XLOC_016633	TcSYL_0202030	TcX10_chr45:108462-108937	DCT	TM	OK	232286	173853	-0.418037	-1.10103	0.0281	0.0395795	yes
XLOC_019385	XLOC_019385	TcSYL_0063520	TcX10_chr7:606640-607031	DCT	TM	OK	150827	103462	-0.543796	-1.10143	0.02535	0.0360144	yes
XLOC_004975	XLOC_004975	TcSYL_0115740	TcX10_chr19:456749-458088	DCT	TM	OK	271446	219653	-0.305443	-1.10283	0.02725	0.0384682	yes
XLOC_011304	XLOC_011304	TcSYL_0163550	TcX10_chr33:344615-345234	DCT	TM	OK	293399	230172	-0.350154	-1.10713	0.0264	0.0373868	yes
XLOC_020591	XLOC_020591	TcSYL_0079910	TcX10_chr9:1080118-1080386	DCT	TM	OK	784005	339301	-1.2083	-1.11065	0.02865	0.0402643	yes
XLOC_012886	XLOC_012886	TcSYL_0180900	TcX10_chr39:232543-233513	DCT	TM	OK	605911	439438	-0.463447	-1.11155	0.0265	0.0375144	yes
XLOC_009509	XLOC_009509	TcSYL_0022900	TcX10_chr3:231772-232100	DCT	TM	OK	437414	323303	-0.436111	-1.11433	0.02865	0.0402643	yes
XLOC_007503	XLOC_007503	TcSYL_0132720	TcX10_chr23:624692-625740	DCT	TM	OK	273367	219.33	-0.317739	-1.11467	0.02555	0.0362713	yes
XLOC_010532	XLOC_010532	TcSYL_0155930	TcX10_chr31:32394-32995	DCT	TM	OK	106321	763334	-0.478044	-1.11806	0.02845	0.0400353	yes
XLOC_020408	XLOC_020408	TcSYL_0075290	TcX10_chr9:368358-368686	DCT	TM	OK	5025.71	456629	-3.46023	-1.12117	5e-05	0.000105404	yes
XLOC_001626	XLOC_001626	TcSYL_0082980	TcX10_chr10:930906-931261	DCT	TM	OK	380918	281385	-0.436936	-1.12232	0.02465	0.0351122	yes
XLOC_002762	XLOC_002762	TcSYL_0094580	TcX10_chr13:412024-413579	DCT	TM	OK	191.7	154176	-0.314273	-1.12342	0.0234	0.0334703	yes
XLOC_005085	XLOC_005085	TcSYL_0116140	TcX10_chr19:590265-592036	DCT	TM	OK	132804	106084	-0.324088	-1.12343	0.0271	0.0382922	yes
XLOC_004957	XLOC_004957	TcSYL_0115540	TcX10_chr19:405031-405434	DCT	TM	OK	293451	218197	-0.427491	-1.12432	0.0268	0.0379178	yes
XLOC_017450	XLOC_017450	TcSYL_0047910	TcX10_chr5:991650-992572	DCT	TM	OK	208288	164153	-0.343534	-1.12508	0.0234	0.0334703	yes
XLOC_004586	XLOC_004586	TcSYL_0109370	TcX10_chr16:205615-206330	DCT	TM	OK	166993	126881	-0.396312	-1.12625	0.0245	0.0349248	yes
XLOC_017300	XLOC_017300	TcSYL_0049610	TcX10_chr5:1287598-1288724	DCT	TM	OK	123829	691014	-0.841561	-1.12697	0.0272	0.0384048	yes
XLOC_000028	XLOC_000028	TcSYL_0000520	TcX10_chr1:162162-163522	DCT	TM	OK	159977	127.16	-0.331222	-1.1271	0.02295	0.0329012	yes
XLOC_019430	XLOC_019430	TcSYL_0063970	TcX10_chr7:907435-908165	DCT	TM	OK	13767	642214	-1.10008	-1.12777	0.029	0.0407184	yes
XLOC_017695	XLOC_017695	TcSYL_0051760	TcX10_chr6:331367-331875	DCT	TM	OK	943112	637859	-0.564193	-1.13044	0.02095	0.0301368	yes
XLOC_019865	XLOC_019865	TcSYL_0073510	TcX10_chr8:783318-783658	DCT	TM	OK	253284	177214	-0.515259	-1.13113	0.02415	0.0344454	yes
XLOC_010843	XLOC_010843	TcSYL_0157900	TcX10_chr32:474725-475152	DCT	TM	OK	349621	264929	-0.400184	-1.13189	0.0232	0.0332156	yes
XLOC_004682	XLOC_004682	TcSYL_0111180	TcX10_chr16:1040694-1040977	DCT	TM	OK	212798	130481	-0.705638	-1.13211	0.0296	0.0414915	yes
XLOC_017341	XLOC_017341	TcSYL_0045140	TcX10_chr5:130967-131280	DCT	TM	OK	192054	124718	-0.622836	-1.13238	0.0231	0.0330849	yes
XLOC_005622	XLOC_005622	TcSYL_0022240	TcX10_chr2:1693789-1694414	DCT	TM	OK	599.8	0.0981125	-1.25778	-1.13257	0.0295	0.0413974	yes
XLOC_005473	XLOC_005473	TcSYL_0019810	TcX10_chr2:943606-944822	DCT	TM	OK	238982	191363	-0.320592	-1.13453	0.02365	0.0337959	yes
XLOC_000729	XLOC_000729	TcSYL_0014340	TcX10_chr1:3031739-3032295	DCT	TM	OK	903143	624406	-0.53247	-1.13541	0.02	0.0288415	yes
XLOC_000212	XLOC_000212	TcSYL_0004240	TcX10_chr1:1136845-1137431	DCT	TM	OK	343266	267699	-0.358714	-1.13688	0.02105	0.0302749	yes
XLOC_003807	XLOC_003807	TcSYL_0103620	TcX10_chr14:918524-919176	DCT	TM	OK	1447.6	989466	-3.87087	-1.13946	5e-05	0.000105404	yes
XLOC_013981	XLOC_013981	TcSYL_0042130	TcX10_chr4:1198976-1199853	DCT	TM	OK	713889	288037	-1.30944	-1.1396	0.0317	0.0441165	yes
XLOC_008403	XLOC_008403	TcSYL_0141810	TcX10_chr27:93165-95125	DCT	TM	OK	335306	246049	-0.446535	-1.14223	0.02335	0.0334114	yes
XLOC_012350	XLOC_012350	TcSYL_0173280	TcX10_chr37:230263-231137	DCT	TM	OK	150592	115.5	-0.382757	-1.14289	0.0194	0.0280243	yes
XLOC_017512	XLOC_017512	TcSYL_0048630	TcX10_chr5:1136747-1137423	DCT	TM	OK	241766	187012	-0.370481	-1.14343	0.02015	0.0290412	yes
XLOC_014785	XLOC_014785	TcSYL_0044020	TcX10_chr4:1362193-1362431	DCT	TM	OK	564639	369149	-0.613125	-1.15117	0.0255	0.0362139	yes
XLOC_017108	XLOC_017108	TcSYL_0045950	TcX10_chr5:391342-392135	DCT	TM	OK	9113.75	6939.46	-0.393222	-1.15312	0.02325	0.0332809	yes
XLOC_008073	XLOC_008073	TcSYL_0138580	TcX10_chr25:155977-156662	DCT	TM	OK	394473	310945	-0.34327	-1.16089	0.02035	0.0293127	yes
XLOC_012651	XLOC_012651	TcSYL_0178130	TcX10_chr38:452000-453222	DCT	TM	OK	984108	74956	-0.392774	-1.16102	0.02345	0.0335291	yes
XLOC_000784	XLOC_000784	TcSYL_0000610	TcX10_chr1:197516-198153	DCT	TM	OK	214765	163.34	-0.394883	-1.16362	0.02185	0.0313837	yes
XLOC_014490	XLOC_014490	TcSYL_0039880	TcX10_chr4:912517-913082	DCT	TM	OK	183784	846471	-1.11848	-1.16769	0.0334	0.0462951	yes
XLOC_008266	XLOC_008266	TcSYL_0139510	TcX10_chr26:196253-197199	DCT	TM	OK	254182	200311	-0.343621	-1.16827	0.01995	0.0287748	yes
XLOC_008283	XLOC_008283	TcSYL_0139680	TcX10_chr26:278505-280471	DCT	TM	OK	790479	68655	-3.52529	-1.16887	5e-05	0.000105404	yes
XLOC_001131	XLOC_001131	TcSYL_0008040	TcX10_chr1:1667083-1667861	DCT	TM	OK	132751	980911	-0.436527	-1.16902	0.01795	0.026054	yes
XLOC_002069	XLOC_002069	TcSYL_0088160	TcX10_chr11:877769-878793	DCT	TM	OK	1104.76	855658	-3.69056	-1.17024	5e-05	0.000105404	yes
XLOC_011127	XLOC_011127	TcSYL_0163470	TcX10_chr33:337085-337380	DCT	TM	OK	266268	172083	-0.629777	-1.17305	0.01995	0.0287748	yes
XLOC_002708	XLOC_002708	TcSYL_0093030	TcX10_chr13:160375-160763	DCT	TM	OK	24396	95532	-1.35259	-1.17313	0.02935	0.0411945	yes
XLOC_004845	XLOC_004845	TcSYL_0114840	TcX10_chr18:694680-694945	DCT	TM	OK	391783	0.553	-6.14663	-1.1782	0.03235	0.0448973	yes
XLOC_009656	XLOC_009656	TcSYL_0027070	TcX10_chr3:1109611-1109948	DCT	TM	OK	777892	600108	-0.374347	-1.18117	0.0216	0.0310423	yes
XLOC_002073	XLOC_002073	TcSYL_0088220	TcX10_chr11:888497-888816	DCT	TM	OK	255231	170397	-0.582899	-1.18251	0.01725	0.0250909	yes
XLOC_011908	XLOC_011908	TcSYL_0170030	TcX10_chr36:243761-244866	DCT	TM	OK	321836	256293	-0.328534	-1.18259	0.01765	0.0256333	yes
XLOC_016730	XLOC_016730	TcSYL_0202590	TcX10_chr45:262003-263207	DCT	TM	OK	149402	858428	-0.799434	-1.18377	0.0207	0.0297941	yes
XLOC_011929	XLOC_011929	TcSYL_0170270	TcX10_chr36:276901-278393	DCT	TM	OK	733258	363481	-1.01244	-1.18554	0.01745	0.0253526	yes
XLOC_014086	XLOC_014086	TcSYL_0044810	TcX10_chr4:1526369-1527003	DCT	TM	OK	233752	177636	-0.396051	-1.18779	0.01655	0.0241656	yes
XLOC_002785	XLOC_002785	TcSYL_0094810	TcX10_chr13:465422-466599	DCT	TM	OK	4759.21	339.05	-3.81115	-1.18874	5e-05	0.000105404	yes
XLOC_017093	XLOC_017093	TcSYL_0045800	TcX10_chr5:328598-329769	DCT	TM	OK	117825	902204	-0.385126	-1.18889	0.01865	0.0270234	yes
XLOC_007756	XLOC_007756	TcSYL_0137900	TcX10_chr24:637816-639116	DCT	TM	OK	104035	796362	-0.385571	-1.19268	0.0159	0.0232794	yes
XLOC_012428	XLOC_012428	TcSYL_0174930	TcX10_chr38:84678-85417	DCT	TM	OK	136761	101119	-0.435598	-1.19313	0.01805	0.0261941	yes
XLOC_004326	XLOC_004326	TcSYL_0108880	TcX10_chr15:917632-918224	DCT	TM	OK	329.42	253658	-0.377047	-1.19333	0.01535	0.0225177	yes
XLOC_006517	XLOC_006517	TcSYL_0122070	TcX10_chr21:282884-283203	DCT	TM	OK	222438	147348	-0.594176	-1.1951	0.02065	0.0297278	yes
XLOC_012264	XLOC_012264	TcSYL_0174640	TcX10_chr37:422360-423762	DCT	TM	OK	111236	860132	-0.370997	-1.19599	0.0147	0.0216523	yes
XLOC_008275	XLOC_008275	TcSYL_0139600	TcX10_chr26:241010-241566	DCT	TM	OK	550318	432102	-0.348894	-1.19762	0.01515	0.0222416	yes
XLOC_018051	XLOC_018051	TcSYL_0050070	TcX10_chr6:54609-55084	DCT	TM	OK	213619	154833	-0.464323	-1.19797	0.01825	0.026459	yes
XLOC_011994	XLOC_011994	TcSYL_0171020	TcX10_chr36:448215-448573	DCT	TM	OK	186996	124586	-0.585867	-1.20003	0.01365	0.0202317	yes
XLOC_004318	XLOC_004318	TcSYL_0108800	TcX10_chr15:892700-893493	DCT	TM	OK	1457.52	100992	-3.8512	-1.20034	5e-05	0.000105404	yes
XLOC_001432	XLOC_001432	TcSYL_0013700	TcX10_chr1:2767564-2767883	DCT	TM	OK	758141	566706	-0.419867	-1.20644	0.0166	0.024234	yes
XLOC_002670	XLOC_002670	TcSYL_0091970	TcX10_chr12:886454-887076	DCT	TM	OK	894133	612878	-0.544891	-1.20695	0.01425	0.0210386	yes
XLOC_002669	XLOC_002669	TcSYL_0091960	TcX10_chr12:884426-885072	DCT	TM	OK	120891	863988	-0.484629	-1.21078	0.0167	0.0243705	yes
XLOC_000925	XLOC_000925	TcSYL_0003160	TcX10_chr1:885249-885859	DCT	TM	OK	177178	130162	-0.444897	-1.21287	0.01765	0.0256333	yes
XLOC_011962	XLOC_011962	TcSYL_0170630	TcX10_chr36:413977-414584	DCT	TM	OK	1050.46	835.79	-0.32981	-1.21362	0.01575	0.0230642	yes
XLOC_012282	XLOC_012282	TcSYL_0174820	TcX10_chr37:472221-473287	DCT	TM	OK	111312	83812	-0.40938	-1.21404	0.01375	0.020368	yes
XLOC_018846	XLOC_018846	TcSYL_0064420	TcX10_chr7:1048645-1049243	DCT	TM	OK	940384	747131	-0.331889	-1.21449	0.0162	0.0237003	yes
XLOC_018717	XLOC_018717	TcSYL_0062340	TcX10_chr7:219232-219719	DCT	TM	OK	116834	32952	-1.82602	-1.21542	0.03005	0.0419746	yes
XLOC_015754	XLOC_015754	TcSYL_0191570	TcX10_chr42:395550-395947	DCT	TM	OK	325484	236567	-0.460339	-1.21625	0.01465	0.0215871	yes
XLOC_008324	XLOC_008324	TcSYL_0140140	TcX10_chr26:379668-380053	DCT	TM	OK	379834	278834	-0.445963	-1.21674	0.01515	0.0222416	yes
XLOC_012825	XLOC_012825	TcSYL_0180010	TcX10_chr39:154786-155333	DCT	TM	OK	101195	685615	-0.561669	-1.21702	0.016	0.0234167	yes
XLOC_020257	XLOC_020257	TcSYL_0079060	TcX10_chr9:960443-960663	DCT	TM	OK	1017.8	677247	-0.587707	-1.21775	0.0331	0.0459129	yes
XLOC_005105	XLOC_005105	TcSYL_0116340	TcX10_chr19:670516-670766	DCT	TM	OK	299.17	174173	-0.780447	-1.22043	0.02465	0.0351122	yes
XLOC_001961	XLOC_001961	TcSYL_0086610	TcX10_chr11:607006-607418	DCT	TM	OK	455651	343998	-0.405526	-1.2207	0.0138	0.02043	yes
XLOC_008062	XLOC_008062	TcSYL_0138460	TcX10_chr25:99975-100633	DCT	TM	OK	225888	11419	-0.984174	-1.22136	0.01715	0.0249502	yes
XLOC_017463	XLOC_017463	TcSYL_0048040	TcX10_chr5:1044694-1045091	DCT	TM	OK	390383	287724	-0.440204	-1.22248	0.0138	0.02043	yes
XLOC_012256	XLOC_012256	TcSYL_0174560	TcX10_chr37:405595-406691	DCT	TM	OK	375744	297381	-0.337441	-1.22306	0.01385	0.020492	yes
XLOC_004827	XLOC_004827	TcSYL_0114630	TcX10_chr18:628796-629247	DCT	TM	OK	226898	162525	-0.481385	-1.22407	0.0151	0.0221854	yes
XLOC_005115	XLOC_005115	TcSYL_0116450	TcX10_chr19:686151-686692	DCT	TM	OK	395502	303812	-0.380505	-1.22415	0.0131	0.0195006	yes
XLOC_001130	XLOC_001130	TcSYL_0008030	TcX10_chr1:1654665-1655299	DCT	TM	OK	283911	217.49	-0.384488	-1.22503	0.01315	0.0195673	yes
XLOC_017153	XLOC_017153	TcSYL_0046450	TcX10_chr5:555696-556576	DCT	TM	OK	102073	746284	-0.451808	-1.22666	0.01555	0.0227846	yes
XLOC_003235	XLOC_003235	TcSYL_0097130	TcX10_chr13:721432-721877	DCT	TM	OK	209687	148011	-0.502537	-1.22715	0.01645	0.0240335	yes
XLOC_020530	XLOC_020530	TcSYL_0077310	TcX10_chr9:671940-672172	DCT	TM	OK	696168	444604	-0.646914	-1.23014	0.0181	0.0262617	yes
XLOC_001453	XLOC_001453	TcSYL_0013910	TcX10_chr1:2854758-2855416	DCT	TM	OK	188829	140473	-0.426784	-1.23037	0.01455	0.0214564	yes
XLOC_012063	XLOC_012063	TcSYL_0170370	TcX10_chr36:322822-323873	DCT	TM	OK	131033	990223	-0.404109	-1.23168	0.0133	0.0197633	yes
XLOC_006986	XLOC_006986	TcSYL_0127640	TcX10_chr22:697051-698096	DCT	TM	OK	109775	826446	-0.409563	-1.2321	0.01305	0.0194338	yes
XLOC_008175	XLOC_008175	TcSYL_0140480	TcX10_chr26:441727-442967	DCT	TM	OK	336614	266167	-0.338764	-1.23281	0.01255	0.0187445	yes
XLOC_009170	XLOC_009170	TcSYL_0024870	TcX10_chr3:838938-840460	DCT	TM	OK	115146	649942	-0.825077	-1.23317	0.0187	0.0270907	yes
XLOC_008314	XLOC_008314	TcSYL_0140040	TcX10_chr26:351291-351994	DCT	TM	OK	450391	352192	-0.354815	-1.23678	0.013	0.0193631	yes
XLOC_002847	XLOC_002847	TcSYL_0095750	TcX10_chr13:536030-536745	DCT	TM	OK	153625	113134	-0.441387	-1.2374	0.01335	0.0198298	yes
XLOC_001631	XLOC_001631	TcSYL_0083040	TcX10_chr10:947808-948679	DCT	TM	OK	188.78	144182	-0.388814	-1.2381	0.0133	0.0197633	yes
XLOC_005264	XLOC_005264	TcSYL_0015500	TcX10_chr2:351389-352437	DCT	TM	OK	689447	492445	-0.485477	-1.24139	0.0137	0.0203019	yes
XLOC_015527	XLOC_015527	TcSYL_0191770	TcX10_chr42:454540-456080	DCT	TM	OK	198242	127385	-0.63806	-1.24263	0.01175	0.0176262	yes
XLOC_008138	XLOC_008138	TcSYL_0139200	TcX10_chr26:48591-50536	DCT	TM	OK	112365	873874	-0.3627	-1.24271	0.01155	0.0173502	yes
XLOC_009167	XLOC_009167	TcSYL_0024820	TcX10_chr3:834749-836271	DCT	TM	OK	120665	683895	-0.819161	-1.2429	0.0142	0.0209689	yes
XLOC_016234	XLOC_016234	TcSYL_0196450	TcX10_chr43:131231-132495	DCT	TM	OK	147642	113688	-0.37703	-1.24299	0.0119	0.0178264	yes
XLOC_004741	XLOC_004741	TcSYL_0113550	TcX10_chr18:450392-450978	DCT	TM	OK	160987	115656	-0.477108	-1.24505	0.0132	0.019634	yes
XLOC_017103	XLOC_017103	TcSYL_0045900	TcX10_chr5:377620-378194	DCT	TM	OK	256.7	192369	-0.416206	-1.24523	0.01275	0.0190132	yes
XLOC_001279	XLOC_001279	TcSYL_0010760	TcX10_chr1:2072883-2073379	DCT	TM	OK	1084.25	855934	-0.34113	-1.24557	0.0139	0.020554	yes
XLOC_002024	XLOC_002024	TcSYL_0087500	TcX10_chr11:796797-797359	DCT	TM	OK	132314	92146	-0.521974	-1.24916	0.01245	0.0186025	yes
XLOC_006397	XLOC_006397	TcSYL_0123030	TcX10_chr21:504830-505773	DCT	TM	OK	1858	1450.45	-0.357254	-1.24931	0.01105	0.0166288	yes
XLOC_015168	XLOC_015168	TcSYL_0187970	TcX10_chr41:200016-200380	DCT	TM	OK	588843	439139	-0.423205	-1.24935	0.013	0.0193631	yes
XLOC_004853	XLOC_004853	TcSYL_0114930	TcX10_chr18:728948-730005	DCT	TM	OK	1416.03	956116	-3.88853	-1.24966	5e-05	0.000105404	yes
XLOC_016589	XLOC_016589	TcSYL_0201420	TcX10_chr44:268387-269483	DCT	TM	OK	595531	419091	-0.506912	-1.25126	0.01285	0.019151	yes
XLOC_015463	XLOC_015463	TcSYL_0190210	TcX10_chr41:396795-397582	DCT	TM	OK	118304	858108	-0.463265	-1.25148	0.0126	0.0188043	yes
XLOC_020358	XLOC_020358	TcSYL_0074780	TcX10_chr9:153642-153871	DCT	TM	OK	3478.19	2616.01	-0.410966	-1.25369	0.01685	0.024561	yes
XLOC_008509	XLOC_008509	TcSYL_0142680	TcX10_chr27:302740-303548	DCT	TM	OK	665538	524515	-0.343537	-1.25506	0.01325	0.0197006	yes
XLOC_012077	XLOC_012077	TcSYL_0171370	TcX10_chr36:511446-511762	DCT	TM	OK	824908	612704	-0.429042	-1.25508	0.01405	0.0207555	yes
XLOC_015067	XLOC_015067	TcSYL_0185390	TcX10_chr40:320670-321571	DCT	TM	OK	449021	120645	-1.89602	-1.2552	0.03235	0.0448973	yes
XLOC_008625	XLOC_008625	TcSYL_0145500	TcX10_chr28:333878-335706	DCT	TM	OK	274588	216764	-0.341143	-1.25604	0.01325	0.0197006	yes
XLOC_004303	XLOC_004303	TcSYL_0108650	TcX10_chr15:851383-852617	DCT	TM	OK	126865	965624	-0.393764	-1.2561	0.0108	0.0162882	yes
XLOC_017348	XLOC_017348	TcSYL_0045210	TcX10_chr5:184960-185627	DCT	TM	OK	185178	136811	-0.436726	-1.2587	0.0121	0.0181045	yes
XLOC_015177	XLOC_015177	TcSYL_0188120	TcX10_chr41:229865-230853	DCT	TM	OK	270344	210.14	-0.363445	-1.25952	0.0107	0.0161406	yes
XLOC_007393	XLOC_007393	TcSYL_0131320	TcX10_chr23:529881-530890	DCT	TM	OK	115329	854385	-0.432803	-1.26038	0.01275	0.0190132	yes
XLOC_009222	XLOC_009222	TcSYL_0025670	TcX10_chr3:980387-980754	DCT	TM	OK	337722	239.35	-0.496714	-1.26136	0.01355	0.0201032	yes
XLOC_000730	XLOC_000730	TcSYL_0014350	TcX10_chr1:3033291-3033784	DCT	TM	OK	139824	954363	-0.551006	-1.26498	0.0138	0.02043	yes
XLOC_008884	XLOC_008884	TcSYL_0147480	TcX10_chr29:321491-323022	DCT	TM	OK	116478	890346	-0.387613	-1.26529	0.0102	0.0154418	yes
XLOC_018734	XLOC_018734	TcSYL_0062630	TcX10_chr7:236042-236529	DCT	TM	OK	131428	398681	-1.72097	-1.26799	0.0256	0.0363287	yes
XLOC_004277	XLOC_004277	TcSYL_0108260	TcX10_chr15:800592-800854	DCT	TM	OK	976979	699956	-0.481065	-1.26867	0.01365	0.0202317	yes
XLOC_017357	XLOC_017357	TcSYL_0045300	TcX10_chr5:209144-209628	DCT	TM	OK	144031	979814	-0.555799	-1.27036	0.0126	0.0188043	yes
XLOC_005886	XLOC_005886	TcSYL_0019700	TcX10_chr2:902612-902889	DCT	TM	OK	1027.93	751652	-0.4516	-1.27059	0.01255	0.0187445	yes
XLOC_016592	XLOC_016592	TcSYL_0201450	TcX10_chr44:284177-284397	DCT	TM	OK	16214.9	947108	-4.09764	-1.2722	5e-05	0.000105404	yes
XLOC_005225	XLOC_005225	TcSYL_0015020	TcX10_chr2:201853-202451	DCT	TM	OK	108228	739098	-0.55024	-1.27692	0.0123	0.0184002	yes
XLOC_014708	XLOC_014708	TcSYL_0043080	TcX10_chr4:1290067-1290740	DCT	TM	OK	281412	212747	-0.403543	-1.28318	0.0086	0.0131564	yes
XLOC_012279	XLOC_012279	TcSYL_0174790	TcX10_chr37:466099-466877	DCT	TM	OK	996636	703635	-0.502239	-1.28466	0.0117	0.0175616	yes
XLOC_015615	XLOC_015615	TcSYL_0193390	TcX10_chr42:607356-608332	DCT	TM	OK	479582	1324	-1.85687	-1.28541	0.03025	0.0422228	yes
XLOC_000807	XLOC_000807	TcSYL_0000840	TcX10_chr1:329358-330442	DCT	TM	OK	155366	117584	-0.401974	-1.28702	0.0099	0.0150087	yes
XLOC_013678	XLOC_013678	TcSYL_0036040	TcX10_chr4:435692-436305	DCT	TM	OK	726068	156879	-2.21045	-1.28754	0.02355	0.0336657	yes
XLOC_005243	XLOC_005243	TcSYL_0015250	TcX10_chr2:298099-298388	DCT	TM	OK	216889	128004	-0.760761	-1.28839	0.00975	0.0147961	yes
XLOC_001462	XLOC_001462	TcSYL_0014000	TcX10_chr1:2898982-2899739	DCT	TM	OK	143033	104272	-0.455997	-1.28885	0.01035	0.0156532	yes
XLOC_009678	XLOC_009678	TcSYL_0027300	TcX10_chr3:1208634-1210816	DCT	TM	OK	336825	264173	-0.350517	-1.29064	0.01095	0.0164915	yes
XLOC_017493	XLOC_017493	TcSYL_0048380	TcX10_chr5:1105027-1105772	DCT	TM	OK	236796	178395	-0.408568	-1.29189	0.0083	0.0127283	yes
XLOC_008667	XLOC_008667	TcSYL_0146140	TcX10_chr28:413178-414256	DCT	TM	OK	744895	530959	-0.488436	-1.29206	0.00915	0.0139443	yes
XLOC_001812	XLOC_001812	TcSYL_0084530	TcX10_chr11:312417-312649	DCT	TM	OK	495998	281.94	-0.814947	-1.2933	0.0127	0.0189498	yes
XLOC_015257	XLOC_015257	TcSYL_0189160	TcX10_chr41:310003-310334	DCT	TM	OK	358686	244715	-0.55162	-1.29336	0.0105	0.0158674	yes
XLOC_008851	XLOC_008851	TcSYL_0146210	TcX10_chr28:518614-518939	DCT	TM	OK	609362	439294	-0.472111	-1.29451	0.0107	0.0161406	yes
XLOC_004313	XLOC_004313	TcSYL_0108750	TcX10_chr15:878148-878788	DCT	TM	OK	321239	243079	-0.402222	-1.29695	0.00875	0.0133697	yes
XLOC_005869	XLOC_005869	TcSYL_0019530	TcX10_chr2:850910-851499	DCT	TM	OK	2201.62	923799	-4.57484	-1.29821	5e-05	0.000105404	yes
XLOC_011722	XLOC_011722	TcSYL_0167050	TcX10_chr35:282717-283504	DCT	TM	OK	254767	193.56	-0.396398	-1.29922	0.0098	0.014866	yes
XLOC_003316	XLOC_003316	TcSYL_0098140	TcX10_chr13:787147-787784	DCT	TM	OK	112914	776789	-0.53963	-1.29986	0.0119	0.0178264	yes
XLOC_008975	XLOC_008975	TcSYL_0146890	TcX10_chr29:90978-91510	DCT	TM	OK	20605	845116	-1.28577	-1.30054	0.0139	0.020554	yes
XLOC_013030	XLOC_013030	TcSYL_0178450	TcX10_chr39:3144-4243	DCT	TM	OK	889867	644556	-0.465284	-1.30091	0.0093	0.0141529	yes
XLOC_018679	XLOC_018679	TcSYL_0061620	TcX10_chr7:127494-128059	DCT	TM	OK	839088	21977	-1.93282	-1.30362	0.0345	0.0476888	yes
XLOC_013012	XLOC_013012	TcSYL_0183130	TcX10_chr39:443825-444684	DCT	TM	OK	485332	0.614881	-2.98059	-1.30548	0.034	0.0470664	yes
XLOC_005870	XLOC_005870	TcSYL_0019540	TcX10_chr2:851658-852307	DCT	TM	OK	2160.86	899219	-4.58679	-1.30668	5e-05	0.000105404	yes
XLOC_016611	XLOC_016611	TcSYL_0201680	TcX10_chr44:398749-399533	DCT	TM	OK	907043	627229	-0.532179	-1.30847	0.01245	0.0186025	yes
XLOC_011267	XLOC_011267	TcSYL_0162960	TcX10_chr33:311831-312174	DCT	TM	OK	147555	872234	-0.758467	-1.30858	0.00865	0.0132249	yes
XLOC_008318	XLOC_008318	TcSYL_0140080	TcX10_chr26:367949-369027	DCT	TM	OK	870508	680.15	-0.356004	-1.30883	0.0089	0.0135852	yes
XLOC_002853	XLOC_002853	TcSYL_0095810	TcX10_chr13:549931-550643	DCT	TM	OK	34453	195243	-0.819357	-1.30946	0.0111	0.0166974	yes
XLOC_000498	XLOC_000498	TcSYL_0009950	TcX10_chr1:1969084-1969427	DCT	TM	OK	1049.64	794.77	-0.401281	-1.30983	0.0084	0.0128713	yes
XLOC_009574	XLOC_009574	TcSYL_0024420	TcX10_chr3:748327-748868	DCT	TM	OK	316622	15348	-1.04471	-1.31008	0.01135	0.0170633	yes
XLOC_005778	XLOC_005778	TcSYL_0018020	TcX10_chr2:522390-523309	DCT	TM	OK	501007	111999	-2.16134	-1.31531	0.0269	0.0380451	yes
XLOC_020429	XLOC_020429	TcSYL_0075500	TcX10_chr9:456452-457128	DCT	TM	OK	759203	213685	-1.829	-1.31609	0.02695	0.0380944	yes
XLOC_000723	XLOC_000723	TcSYL_0014280	TcX10_chr1:3022718-3023259	DCT	TM	OK	631105	484865	-0.380298	-1.31703	0.00895	0.0136532	yes
XLOC_014325	XLOC_014325	TcSYL_0035670	TcX10_chr4:413412-413659	DCT	TM	OK	744665	0.582749	-6.99757	-1.31746	0.03095	0.0431203	yes
XLOC_002195	XLOC_002195	TcSYL_0084180	TcX10_chr11:230972-232755	DCT	TM	OK	250241	194789	-0.361407	-1.31841	0.0092	0.014012	yes
XLOC_000848	XLOC_000848	TcSYL_0001560	TcX10_chr1:593597-594147	DCT	TM	OK	166477	116372	-0.516578	-1.31848	0.00945	0.0143667	yes
XLOC_002518	XLOC_002518	TcSYL_0091720	TcX10_chr12:556789-557705	DCT	TM	OK	278339	213161	-0.384899	-1.3193	0.0081	0.0124393	yes
XLOC_011958	XLOC_011958	TcSYL_0170590	TcX10_chr36:406550-408822	DCT	TM	OK	985749	749519	-0.395256	-1.32032	0.00845	0.0129426	yes
XLOC_011230	XLOC_011230	TcSYL_0162400	TcX10_chr33:279005-279507	DCT	TM	OK	570597	433956	-0.394922	-1.32103	0.00825	0.0126542	yes
XLOC_015553	XLOC_015553	TcSYL_0192190	TcX10_chr42:487164-488647	DCT	TM	OK	635198	458261	-0.471038	-1.32168	0.00885	0.013517	yes
XLOC_014652	XLOC_014652	TcSYL_0042340	TcX10_chr4:1216233-1216852	DCT	TM	OK	138057	963234	-0.51931	-1.32265	0.00895	0.0136532	yes
XLOC_009445	XLOC_009445	TcSYL_0029270	TcX10_chr3:1554260-1554621	DCT	TM	OK	197036	578158	-1.76892	-1.32273	0.0276	0.038926	yes
XLOC_010929	XLOC_010929	TcSYL_0159360	TcX10_chr32:587825-588462	DCT	TM	OK	113025	783166	-0.529246	-1.32343	0.01035	0.0156532	yes
XLOC_019914	XLOC_019914	TcSYL_0074000	TcX10_chr8:903137-904308	DCT	TM	OK	2631.23	151471	-4.11862	-1.32446	5e-05	0.000105404	yes
XLOC_016776	XLOC_016776	TcSYL_0203400	TcX10_chr46:285168-285871	DCT	TM	OK	922152	611906	-0.591694	-1.32818	0.00585	0.00917761	yes
XLOC_013484	XLOC_013484	TcSYL_0032670	TcX10_chr4:214533-215149	DCT	TM	OK	694832	0.992465	-2.80758	-1.32847	0.0285	0.0400907	yes
XLOC_016554	XLOC_016554	TcSYL_0200710	TcX10_chr44:101639-102942	DCT	TM	OK	923977	67783	-0.446933	-1.32874	0.00845	0.0129426	yes
XLOC_017574	XLOC_017574	TcSYL_0049870	TcX10_chr5:1321250-1321962	DCT	TM	OK	1763.41	539874	-5.0296	-1.32948	5e-05	0.000105404	yes
XLOC_018696	XLOC_018696	TcSYL_0062070	TcX10_chr7:177501-177772	DCT	TM	OK	1549.23	1151.35	-0.428223	-1.33012	0.00945	0.0143667	yes
XLOC_005468	XLOC_005468	TcSYL_0019760	TcX10_chr2:927527-927936	DCT	TM	OK	753054	569024	-0.404264	-1.3311	0.008	0.0122957	yes
XLOC_010537	XLOC_010537	TcSYL_0155980	TcX10_chr31:62472-62944	DCT	TM	OK	579413	437875	-0.404073	-1.33141	0.00815	0.0125135	yes
XLOC_002400	XLOC_002400	TcSYL_0089860	TcX10_chr12:305316-305578	DCT	TM	OK	321451	188056	-0.773434	-1.33162	0.0097	0.0147231	yes
XLOC_007390	XLOC_007390	TcSYL_0131280	TcX10_chr23:527449-527912	DCT	TM	OK	244.87	172899	-0.502089	-1.33173	0.0084	0.0128713	yes
XLOC_008862	XLOC_008862	TcSYL_0146320	TcX10_chr28:533225-534225	DCT	TM	OK	149067	110679	-0.42958	-1.33302	0.0065	0.0101343	yes
XLOC_007504	XLOC_007504	TcSYL_0132760	TcX10_chr23:627529-627752	DCT	TM	OK	14554	325391	-5.4831	-1.33338	5e-05	0.000105404	yes
XLOC_003312	XLOC_003312	TcSYL_0098090	TcX10_chr13:784725-785188	DCT	TM	OK	335729	243598	-0.462798	-1.33846	0.0072	0.0111613	yes
XLOC_018887	XLOC_018887	TcSYL_0064950	TcX10_chr7:1140819-1141900	DCT	TM	OK	171324	902044	-0.925455	-1.34072	0.0112	0.0168445	yes
XLOC_008011	XLOC_008011	TcSYL_0137590	TcX10_chr24:554772-555265	DCT	TM	OK	19.72	736582	-1.42074	-1.34081	0.015	0.0220513	yes
XLOC_005086	XLOC_005086	TcSYL_0116150	TcX10_chr19:592064-593232	DCT	TM	OK	141566	105773	-0.4205	-1.34164	0.0078	0.0120127	yes
XLOC_014780	XLOC_014780	TcSYL_0043970	TcX10_chr4:1356525-1356967	DCT	TM	OK	350563	253026	-0.470392	-1.34611	0.0073	0.0113094	yes
XLOC_017588	XLOC_017588	TcSYL_0050160	TcX10_chr6:97634-98802	DCT	TM	OK	140816	105101	-0.42204	-1.34629	0.0058	0.00910861	yes
XLOC_000540	XLOC_000540	TcSYL_0010510	TcX10_chr1:2012360-2012790	DCT	TM	OK	136421	867696	-0.652806	-1.34963	0.00685	0.0106406	yes
XLOC_011388	XLOC_011388	TcSYL_0164930	TcX10_chr34:406214-406821	DCT	TM	OK	180507	127862	-0.497459	-1.3499	0.00715	0.0110884	yes
XLOC_016721	XLOC_016721	TcSYL_0202500	TcX10_chr45:238556-239571	DCT	TM	OK	557188	431821	-0.36773	-1.35072	0.00685	0.0106406	yes
XLOC_006505	XLOC_006505	TcSYL_0121890	TcX10_chr21:262264-262862	DCT	TM	OK	224021	161316	-0.473749	-1.35267	0.00665	0.0103575	yes
XLOC_018741	XLOC_018741	TcSYL_0062720	TcX10_chr7:241697-242184	DCT	TM	OK	131683	395614	-1.73491	-1.35283	0.0247	0.0351768	yes
XLOC_004966	XLOC_004966	TcSYL_0115650	TcX10_chr19:434282-435171	DCT	TM	OK	110679	784522	-0.496498	-1.3571	0.00725	0.0112365	yes
XLOC_017249	XLOC_017249	TcSYL_0048560	TcX10_chr5:1119686-1120146	DCT	TM	OK	586132	326344	-0.844834	-1.3586	0.0145	0.0213869	yes
XLOC_009026	XLOC_009026	TcSYL_0147510	TcX10_chr29:323971-324503	DCT	TM	OK	132401	397116	-1.73728	-1.35937	0.01745	0.0253526	yes
XLOC_011618	XLOC_011618	TcSYL_0167510	TcX10_chr35:408499-408764	DCT	TM	OK	291597	164405	-0.826723	-1.36165	0.0077	0.0118756	yes
XLOC_006400	XLOC_006400	TcSYL_0123060	TcX10_chr21:514964-515496	DCT	TM	OK	526489	397766	-0.404484	-1.36181	0.00515	0.0081504	yes
XLOC_014032	XLOC_014032	TcSYL_0044190	TcX10_chr4:1426866-1427164	DCT	TM	OK	326852	209096	-0.644474	-1.36343	0.00685	0.0106406	yes
XLOC_017838	XLOC_017838	TcSYL_0055820	TcX10_chr6:792420-792847	DCT	TM	OK	134057	833906	-0.684891	-1.36455	0.0043	0.0068975	yes
XLOC_008044	XLOC_008044	TcSYL_0138280	TcX10_chr25:39939-41266	DCT	TM	OK	118967	881256	-0.43293	-1.36492	0.00575	0.00903947	yes
XLOC_018048	XLOC_018048	TcSYL_0050040	TcX10_chr6:37005-37930	DCT	TM	OK	237751	179277	-0.407257	-1.36495	0.00595	0.00932676	yes
XLOC_010730	XLOC_010730	TcSYL_0159180	TcX10_chr32:556620-557740	DCT	TM	OK	182.23	137038	-0.41118	-1.36583	0.006	0.0093993	yes
XLOC_002416	XLOC_002416	TcSYL_0090070	TcX10_chr12:321069-321841	DCT	TM	OK	566496	359069	-0.657803	-1.36973	0.0095	0.0144398	yes
XLOC_007508	XLOC_007508	TcSYL_0132820	TcX10_chr23:640350-640666	DCT	TM	OK	455284	307.45	-0.566415	-1.3701	0.0065	0.0101343	yes
XLOC_015464	XLOC_015464	TcSYL_0190220	TcX10_chr41:409784-410067	DCT	TM	OK	135489	639249	-1.08373	-1.37158	0.00775	0.0119479	yes
XLOC_004339	XLOC_004339	TcSYL_0109570	TcX10_chr16:343174-343847	DCT	TM	OK	820794	535712	-0.615561	-1.3736	0.00595	0.00932676	yes
XLOC_017462	XLOC_017462	TcSYL_0048030	TcX10_chr5:1043470-1043837	DCT	TM	OK	527929	379463	-0.476386	-1.37431	0.0068	0.0105737	yes
XLOC_012005	XLOC_012005	TcSYL_0171140	TcX10_chr36:485208-485908	DCT	TM	OK	146641	103168	-0.507295	-1.3772	0.005	0.00792959	yes
XLOC_003277	XLOC_003277	TcSYL_0097670	TcX10_chr13:757367-757611	DCT	TM	OK	558547	333168	-0.745428	-1.37843	0.01365	0.0202317	yes
XLOC_001814	XLOC_001814	TcSYL_0084550	TcX10_chr11:313408-314240	DCT	TM	OK	228355	171101	-0.416432	-1.38315	0.00555	0.00874139	yes
XLOC_006589	XLOC_006589	TcSYL_0123000	TcX10_chr21:481339-482720	DCT	TM	OK	221911	169214	-0.391134	-1.38512	0.006	0.0093993	yes
XLOC_004171	XLOC_004171	TcSYL_0107000	TcX10_chr15:510337-510809	DCT	TM	OK	349937	252099	-0.473102	-1.3887	0.00455	0.00726617	yes
XLOC_020162	XLOC_020162	TcSYL_0077800	TcX10_chr9:701698-702599	DCT	TM	OK	495531	113311	-2.12869	-1.38912	0.02535	0.0360144	yes
XLOC_004602	XLOC_004602	TcSYL_0109530	TcX10_chr16:320862-321220	DCT	TM	OK	192257	119349	-0.687843	-1.39111	0.0049	0.00778405	yes
XLOC_002196	XLOC_002196	TcSYL_0084190	TcX10_chr11:232795-233459	DCT	TM	OK	316451	233853	-0.436378	-1.3919	0.00395	0.00639162	yes
XLOC_014585	XLOC_014585	TcSYL_0041280	TcX10_chr4:1082221-1082600	DCT	TM	OK	212286	136965	-0.632201	-1.39552	0.00495	0.00785688	yes
XLOC_000626	XLOC_000626	TcSYL_0012700	TcX10_chr1:2452143-2452699	DCT	TM	OK	249104	111665	-1.15757	-1.39687	0.01005	0.015233	yes
XLOC_013649	XLOC_013649	TcSYL_0035550	TcX10_chr4:404520-405199	DCT	TM	OK	606357	106259	-2.51258	-1.39766	0.03235	0.0448973	yes
XLOC_006503	XLOC_006503	TcSYL_0121860	TcX10_chr21:241080-241531	DCT	TM	OK	127446	800564	-0.670804	-1.39837	0.0049	0.00778405	yes
XLOC_012010	XLOC_012010	TcSYL_0171190	TcX10_chr36:495673-497285	DCT	TM	OK	570039	436674	-0.384505	-1.40177	0.005	0.00792959	yes
XLOC_015830	XLOC_015830	TcSYL_0193130	TcX10_chr42:583522-584708	DCT	TM	OK	497372	151762	-1.71251	-1.40181	0.0148	0.0217911	yes
XLOC_019903	XLOC_019903	TcSYL_0073890	TcX10_chr8:876538-876896	DCT	TM	OK	151066	958689	-0.656044	-1.40196	0.01495	0.0219906	yes
XLOC_010151	XLOC_010151	TcSYL_0155640	TcX10_chr30:530802-531058	DCT	TM	OK	376854	51082	-2.88312	-1.40288	0.03	0.0419202	yes
XLOC_018469	XLOC_018469	TcSYL_0057340	TcX10_chr6:1002276-1003771	DCT	TM	OK	145906	109444	-0.414844	-1.40415	0.0048	0.00764123	yes
XLOC_013278	XLOC_013278	TcSYL_0183340	TcX10_chr39:460873-461270	DCT	TM	OK	187081	489501	-1.93428	-1.4042	0.01575	0.0230642	yes
XLOC_000576	XLOC_000576	TcSYL_0011640	TcX10_chr1:2367042-2367304	DCT	TM	OK	357742	206398	-0.793486	-1.40536	0.00565	0.0088878	yes
XLOC_002357	XLOC_002357	TcSYL_0089280	TcX10_chr12:154926-155473	DCT	TM	OK	297315	214775	-0.469168	-1.40615	0.0048	0.00764123	yes
XLOC_010542	XLOC_010542	TcSYL_0156030	TcX10_chr31:91564-93095	DCT	TM	OK	130485	974037	-0.421839	-1.40848	0.0045	0.00719088	yes
XLOC_000951	XLOC_000951	TcSYL_0003420	TcX10_chr1:963772-964391	DCT	TM	OK	187821	133017	-0.497746	-1.41018	0.0049	0.00778405	yes
XLOC_018740	XLOC_018740	TcSYL_0062710	TcX10_chr7:241065-241552	DCT	TM	OK	126591	28427	-2.15484	-1.41125	0.0201	0.0289801	yes
XLOC_000681	XLOC_000681	TcSYL_0013450	TcX10_chr1:2511134-2512083	DCT	TM	OK	185796	136587	-0.443901	-1.41191	0.00415	0.00668381	yes
XLOC_011104	XLOC_011104	TcSYL_0162840	TcX10_chr33:304805-305193	DCT	TM	OK	253769	168587	-0.590024	-1.41213	0.0055	0.00866986	yes
XLOC_005102	XLOC_005102	TcSYL_0116310	TcX10_chr19:660542-661512	DCT	TM	OK	191718	141634	-0.436818	-1.41394	0.0043	0.0068975	yes
XLOC_001839	XLOC_001839	TcSYL_0084930	TcX10_chr11:361856-362139	DCT	TM	OK	520345	345.77	-0.589654	-1.41395	0.00655	0.010206	yes
XLOC_000482	XLOC_000482	TcSYL_0009750	TcX10_chr1:1954877-1955232	DCT	TM	OK	130068	728485	-0.836292	-1.42047	0.00485	0.00771596	yes
XLOC_017327	XLOC_017327	TcSYL_0044980	TcX10_chr5:60733-60962	DCT	TM	OK	26900.3	1588.33	-4.08204	-1.42056	5e-05	0.000105404	yes
XLOC_001501	XLOC_001501	TcSYL_0080900	TcX10_chr10:392706-393259	DCT	TM	OK	127939	841174	-0.604983	-1.42099	0.0054	0.00852288	yes
XLOC_017190	XLOC_017190	TcSYL_0046900	TcX10_chr5:638833-639101	DCT	TM	OK	565373	360703	-0.648393	-1.42277	0.0045	0.00719088	yes
XLOC_011834	XLOC_011834	TcSYL_0168990	TcX10_chr36:112989-113863	DCT	TM	OK	180907	131.91	-0.45569	-1.42347	0.0037	0.00601022	yes
XLOC_002601	XLOC_002601	TcSYL_0090150	TcX10_chr12:326336-326658	DCT	TM	OK	690775	282035	-1.29234	-1.42406	0.0074	0.0114456	yes
XLOC_002589	XLOC_002589	TcSYL_0089770	TcX10_chr12:299512-300062	DCT	TM	OK	156728	107158	-0.548517	-1.42478	0.01055	0.0159366	yes
XLOC_017109	XLOC_017109	TcSYL_0045960	TcX10_chr5:392226-392656	DCT	TM	OK	8388.36	6233.87	-0.428261	-1.42489	0.00435	0.00697622	yes
XLOC_014873	XLOC_014873	TcSYL_0184890	TcX10_chr40:219686-221721	DCT	TM	OK	170447	129438	-0.397057	-1.42499	0.00495	0.00785688	yes
XLOC_003310	XLOC_003310	TcSYL_0098070	TcX10_chr13:783874-784154	DCT	TM	OK	226151	121.77	-0.893131	-1.42527	0.00485	0.00771596	yes
XLOC_004971	XLOC_004971	TcSYL_0115700	TcX10_chr19:447114-448216	DCT	TM	OK	197874	147455	-0.424309	-1.42644	0.00315	0.00519939	yes
XLOC_002422	XLOC_002422	TcSYL_0090210	TcX10_chr12:328893-329704	DCT	TM	OK	244398	179883	-0.442176	-1.42649	0.00455	0.00726617	yes
XLOC_004330	XLOC_004330	TcSYL_0108920	TcX10_chr15:941395-942710	DCT	TM	OK	404.12	308675	-0.388694	-1.42691	0.0041	0.00661172	yes
XLOC_015388	XLOC_015388	TcSYL_0187880	TcX10_chr41:162192-163177	DCT	TM	OK	149512	108599	-0.46125	-1.42915	0.00445	0.00712452	yes
XLOC_004537	XLOC_004537	TcSYL_0112490	TcX10_chr16:1429912-1431179	DCT	TM	OK	155935	115814	-0.429143	-1.42949	0.00405	0.00653945	yes
XLOC_007372	XLOC_007372	TcSYL_0131020	TcX10_chr23:512126-512727	DCT	TM	OK	706044	425422	-0.730865	-1.4305	0.00485	0.00771596	yes
XLOC_006590	XLOC_006590	TcSYL_0123010	TcX10_chr21:487727-489048	DCT	TM	OK	284843	216268	-0.39735	-1.43093	0.00415	0.00668381	yes
XLOC_020411	XLOC_020411	TcSYL_0075320	TcX10_chr9:393059-393687	DCT	TM	OK	135984	920817	-0.562447	-1.43217	0.0053	0.00837378	yes
XLOC_000189	XLOC_000189	TcSYL_0004010	TcX10_chr1:1084458-1085368	DCT	TM	OK	118133	82581	-0.516529	-1.43284	0.0042	0.00675714	yes
XLOC_005150	XLOC_005150	TcSYL_0116900	TcX10_chr19:721630-722024	DCT	TM	OK	239045	156632	-0.609902	-1.43368	0.00395	0.00639162	yes
XLOC_017835	XLOC_017835	TcSYL_0055710	TcX10_chr6:786789-787039	DCT	TM	OK	123264	441882	-1.48002	-1.44019	0.0052	0.00822437	yes
XLOC_004996	XLOC_004996	TcSYL_0116710	TcX10_chr19:706897-707111	DCT	TM	OK	341784	136339	-1.32588	-1.44099	0.0092	0.014012	yes
XLOC_020466	XLOC_020466	TcSYL_0075930	TcX10_chr9:556935-557806	DCT	TM	OK	447857	0.881528	-2.34496	-1.44314	0.03215	0.0446935	yes
XLOC_014656	XLOC_014656	TcSYL_0042390	TcX10_chr4:1218653-1219509	DCT	TM	OK	238547	175869	-0.439776	-1.44353	0.00295	0.00489597	yes
XLOC_006251	XLOC_006251	TcSYL_0118560	TcX10_chr20:350224-351977	DCT	TM	OK	133635	998225	-0.420861	-1.44455	0.0034	0.00556711	yes
XLOC_000323	XLOC_000323	TcSYL_0005580	TcX10_chr1:1379836-1380245	DCT	TM	OK	160301	99372	-0.689876	-1.4459	0.00365	0.00593282	yes
XLOC_016756	XLOC_016756	TcSYL_0203200	TcX10_chr46:241791-242383	DCT	TM	OK	247032	175759	-0.491102	-1.44775	0.00315	0.00519939	yes
XLOC_012869	XLOC_012869	TcSYL_0180680	TcX10_chr39:220009-220820	DCT	TM	OK	112281	771886	-0.540659	-1.44828	0.0033	0.00541744	yes
XLOC_017400	XLOC_017400	TcSYL_0047410	TcX10_chr5:858616-859478	DCT	TM	OK	85121	57011	-0.578273	-1.44839	0.0042	0.00675714	yes
XLOC_007222	XLOC_007222	TcSYL_0132790	TcX10_chr23:629200-629729	DCT	TM	OK	457.31	336004	-0.444693	-1.44979	0.00305	0.00505085	yes
XLOC_001317	XLOC_001317	TcSYL_0011150	TcX10_chr1:2204796-2205478	DCT	TM	OK	253313	183238	-0.467206	-1.4508	0.00335	0.00549356	yes
XLOC_018479	XLOC_018479	TcSYL_0057440	TcX10_chr6:1024408-1025039	DCT	TM	OK	189414	132333	-0.517371	-1.45124	0.0042	0.00675714	yes
XLOC_001286	XLOC_001286	TcSYL_0010830	TcX10_chr1:2099893-2100506	DCT	TM	OK	203005	142824	-0.507281	-1.45182	0.00385	0.00624048	yes
XLOC_005875	XLOC_005875	TcSYL_0019590	TcX10_chr2:862225-863375	DCT	TM	OK	117.86	84.53	-0.479541	-1.45184	0.0044	0.00705193	yes
XLOC_017442	XLOC_017442	TcSYL_0047830	TcX10_chr5:959252-959616	DCT	TM	OK	281279	184522	-0.608213	-1.45338	0.00395	0.00639162	yes
XLOC_020419	XLOC_020419	TcSYL_0075400	TcX10_chr9:426802-427646	DCT	TM	OK	750423	485005	-0.629703	-1.45728	0.0033	0.00541744	yes
XLOC_019881	XLOC_019881	TcSYL_0073670	TcX10_chr8:823959-824503	DCT	TM	OK	1094.84	830415	-0.398819	-1.45737	0.00335	0.00549356	yes
XLOC_011542	XLOC_011542	TcSYL_0164900	TcX10_chr34:404054-404391	DCT	TM	OK	160064	894727	-0.839128	-1.45822	0.0045	0.00719088	yes
XLOC_012737	XLOC_012737	TcSYL_0177230	TcX10_chr38:336559-336977	DCT	TM	OK	171217	107716	-0.668592	-1.45822	0.0047	0.00748991	yes
XLOC_016022	XLOC_016022	TcSYL_0196900	TcX10_chr43:168613-168845	DCT	TM	OK	488304	262176	-0.897245	-1.46013	0.01205	0.0180369	yes
XLOC_020400	XLOC_020400	TcSYL_0075210	TcX10_chr9:329282-329742	DCT	TM	OK	335972	134811	-1.31741	-1.46103	0.0055	0.00866986	yes
XLOC_018824	XLOC_018824	TcSYL_0064190	TcX10_chr7:970238-970512	DCT	TM	OK	239877	127779	-0.90865	-1.46107	0.00445	0.00712452	yes
XLOC_004422	XLOC_004422	TcSYL_0111200	TcX10_chr16:1042850-1043424	DCT	TM	OK	89141	173756	-2.35902	-1.46152	0.03235	0.0448973	yes
XLOC_014203	XLOC_014203	TcSYL_0032880	TcX10_chr4:228755-229002	DCT	TM	OK	744665	0.67111	-6.7939	-1.46237	0.03235	0.0448973	yes
XLOC_016641	XLOC_016641	TcSYL_0202110	TcX10_chr45:129577-130436	DCT	TM	OK	391691	294452	-0.41168	-1.46298	0.0036	0.00586919	yes
XLOC_001970	XLOC_001970	TcSYL_0086700	TcX10_chr11:637866-638533	DCT	TM	OK	297444	216846	-0.455945	-1.46373	0.00365	0.00593282	yes
XLOC_018743	XLOC_018743	TcSYL_0062740	TcX10_chr7:242956-243368	DCT	TM	OK	130327	322353	-2.01542	-1.46558	0.0335	0.0464167	yes
XLOC_010902	XLOC_010902	TcSYL_0158910	TcX10_chr32:535667-537228	DCT	TM	OK	856502	615298	-0.477172	-1.46559	0.0045	0.00719088	yes
XLOC_015408	XLOC_015408	TcSYL_0188540	TcX10_chr41:259927-260219	DCT	TM	OK	340.36	207895	-0.711203	-1.46658	0.0027	0.00451172	yes
XLOC_006411	XLOC_006411	TcSYL_0123210	TcX10_chr21:537357-537697	DCT	TM	OK	905338	652895	-0.471605	-1.46703	0.00285	0.00474248	yes
XLOC_002044	XLOC_002044	TcSYL_0087860	TcX10_chr11:818668-819017	DCT	TM	OK	583765	231498	-1.33439	-1.46794	0.00315	0.00519939	yes
XLOC_014742	XLOC_014742	TcSYL_0043480	TcX10_chr4:1321120-1321814	DCT	TM	OK	231969	165.98	-0.482924	-1.4699	0.0031	0.00512804	yes
XLOC_019973	XLOC_019973	TcSYL_0072580	TcX10_chr8:199209-199774	DCT	TM	OK	979395	60877	-0.685995	-1.47017	0.0035	0.00572342	yes
XLOC_001277	XLOC_001277	TcSYL_0010740	TcX10_chr1:2059221-2059903	DCT	TM	OK	248.33	178753	-0.474289	-1.4704	0.0027	0.00451172	yes
XLOC_011910	XLOC_011910	TcSYL_0170050	TcX10_chr36:247532-247926	DCT	TM	OK	324367	219006	-0.566659	-1.47113	0.0032	0.00526928	yes
XLOC_000962	XLOC_000962	TcSYL_0003840	TcX10_chr1:1073206-1073900	DCT	TM	OK	718749	543611	-0.402914	-1.47338	0.0033	0.00541744	yes
XLOC_005274	XLOC_005274	TcSYL_0015670	TcX10_chr2:364710-365128	DCT	TM	OK	275808	185015	-0.576021	-1.47363	0.0033	0.00541744	yes
XLOC_009084	XLOC_009084	TcSYL_0023420	TcX10_chr3:563529-563977	DCT	TM	OK	284896	194597	-0.549948	-1.47378	0.003	0.00497349	yes
XLOC_004750	XLOC_004750	TcSYL_0113650	TcX10_chr18:459617-460017	DCT	TM	OK	399.82	276976	-0.52959	-1.47382	0.0043	0.0068975	yes
XLOC_000258	XLOC_000258	TcSYL_0004710	TcX10_chr1:1256011-1256360	DCT	TM	OK	529147	367089	-0.527538	-1.47387	0.0028	0.00466235	yes
XLOC_016582	XLOC_016582	TcSYL_0201350	TcX10_chr44:248709-249733	DCT	TM	OK	192302	140595	-0.451826	-1.47473	0.00275	0.00458818	yes
XLOC_019883	XLOC_019883	TcSYL_0073690	TcX10_chr8:834042-835564	DCT	TM	OK	164814	122618	-0.42666	-1.4763	0.0027	0.00451172	yes
XLOC_002342	XLOC_002342	TcSYL_0089130	TcX10_chr12:114152-115530	DCT	TM	OK	464365	349948	-0.408118	-1.47639	0.00295	0.00489597	yes
XLOC_017452	XLOC_017452	TcSYL_0047930	TcX10_chr5:999862-1000256	DCT	TM	OK	219391	142392	-0.623638	-1.47754	0.00365	0.00593282	yes
XLOC_008847	XLOC_008847	TcSYL_0146170	TcX10_chr28:508530-509026	DCT	TM	OK	132032	834107	-0.662584	-1.47937	0.0032	0.00526928	yes
XLOC_000734	XLOC_000734	TcSYL_0014390	TcX10_chr1:3047021-3047691	DCT	TM	OK	345325	252.97	-0.448989	-1.47946	0.00275	0.00458818	yes
XLOC_004174	XLOC_004174	TcSYL_0107030	TcX10_chr15:519946-520316	DCT	TM	OK	269107	174118	-0.628115	-1.48269	0.00365	0.00593282	yes
XLOC_002760	XLOC_002760	TcSYL_0094550	TcX10_chr13:398660-399726	DCT	TM	OK	96263	669672	-0.523526	-1.48345	0.0031	0.00512804	yes
XLOC_005182	XLOC_005182	TcSYL_0117380	TcX10_chr19:756512-756720	DCT	TM	OK	2348.78	1514.56	-0.633015	-1.4855	0.00515	0.0081504	yes
XLOC_009243	XLOC_009243	TcSYL_0025960	TcX10_chr3:1001562-1002697	DCT	TM	OK	873039	605847	-0.527094	-1.48565	0.0028	0.00466235	yes
XLOC_002897	XLOC_002897	TcSYL_0097460	TcX10_chr13:744337-744611	DCT	TM	OK	513878	324533	-0.663059	-1.48858	0.0038	0.00616207	yes
XLOC_003357	XLOC_003357	TcSYL_0098790	TcX10_chr13:829169-829578	DCT	TM	OK	163787	100378	-0.706375	-1.48924	0.0027	0.00451172	yes
XLOC_020080	XLOC_020080	TcSYL_0076680	TcX10_chr9:618134-618645	DCT	TM	OK	224.35	152188	-0.559894	-1.48932	0.00355	0.00579517	yes
XLOC_005214	XLOC_005214	TcSYL_0014910	TcX10_chr2:143868-144928	DCT	TM	OK	2698.32	915453	-4.88143	-1.49028	5e-05	0.000105404	yes
XLOC_017443	XLOC_017443	TcSYL_0047840	TcX10_chr5:959737-960578	DCT	TM	OK	189.89	136041	-0.481122	-1.4929	0.00265	0.00443699	yes
XLOC_019357	XLOC_019357	TcSYL_0062320	TcX10_chr7:218071-218444	DCT	TM	OK	19543	417492	-2.22683	-1.49385	0.0241	0.0343805	yes
XLOC_016758	XLOC_016758	TcSYL_0203220	TcX10_chr46:243805-244271	DCT	TM	OK	275665	188237	-0.550366	-1.49753	0.0027	0.00451172	yes
XLOC_016290	XLOC_016290	TcSYL_0197160	TcX10_chr43:218312-218652	DCT	TM	OK	344621	223461	-0.62499	-1.49821	0.0033	0.00541744	yes
XLOC_001723	XLOC_001723	TcSYL_0082400	TcX10_chr10:693759-694993	DCT	TM	OK	165831	121317	-0.450931	-1.4996	0.002	0.00341362	yes
XLOC_010776	XLOC_010776	TcSYL_0159950	TcX10_chr32:921209-921801	DCT	TM	OK	549737	301467	-0.866744	-1.50038	0.0038	0.00616207	yes
XLOC_000083	XLOC_000083	TcSYL_0001810	TcX10_chr1:744958-745925	DCT	TM	OK	506907	316955	-0.677445	-1.50451	0.00315	0.00519939	yes
XLOC_008412	XLOC_008412	TcSYL_0141900	TcX10_chr27:122246-122880	DCT	TM	OK	888427	552459	-0.685385	-1.50552	0.0023	0.00389579	yes
XLOC_014577	XLOC_014577	TcSYL_0041200	TcX10_chr4:1063406-1064142	DCT	TM	OK	327211	239652	-0.449279	-1.50698	0.0028	0.00466235	yes
XLOC_003236	XLOC_003236	TcSYL_0097140	TcX10_chr13:721912-722387	DCT	TM	OK	355023	248835	-0.512725	-1.50727	0.0024	0.00405157	yes
XLOC_019538	XLOC_019538	TcSYL_0066560	TcX10_chr7:1419743-1421061	DCT	TM	OK	543919	156835	-1.79414	-1.50757	0.0154	0.0225823	yes
XLOC_004111	XLOC_004111	TcSYL_0106180	TcX10_chr15:318222-318625	DCT	TM	OK	736064	359685	-1.0331	-1.50809	0.00495	0.00785688	yes
XLOC_001837	XLOC_001837	TcSYL_0084910	TcX10_chr11:358177-359669	DCT	TM	OK	335539	252879	-0.408031	-1.50955	0.00275	0.00458818	yes
XLOC_003899	XLOC_003899	TcSYL_0106730	TcX10_chr15:360145-360404	DCT	TM	OK	192.39	109.11	-0.818253	-1.51043	0.03025	0.0422228	yes
XLOC_019370	XLOC_019370	TcSYL_0062610	TcX10_chr7:234889-235262	DCT	TM	OK	22543	416206	-2.43731	-1.51061	0.01385	0.020492	yes
XLOC_015214	XLOC_015214	TcSYL_0188620	TcX10_chr41:266294-266610	DCT	TM	OK	687473	249956	-1.45963	-1.51068	0.0038	0.00616207	yes
XLOC_011831	XLOC_011831	TcSYL_0168960	TcX10_chr36:107430-107701	DCT	TM	OK	514296	319698	-0.685886	-1.51072	0.004	0.00646976	yes
XLOC_019853	XLOC_019853	TcSYL_0073380	TcX10_chr8:325387-325997	DCT	TM	OK	245775	173156	-0.505261	-1.5122	0.00215	0.00365399	yes
XLOC_019888	XLOC_019888	TcSYL_0073740	TcX10_chr8:849763-851429	DCT	TM	OK	140.2	103308	-0.440535	-1.51403	0.0021	0.00357302	yes
XLOC_005127	XLOC_005127	TcSYL_0116610	TcX10_chr19:697525-697733	DCT	TM	OK	634.78	296041	-1.10046	-1.51433	0.0068	0.0105737	yes
XLOC_004154	XLOC_004154	TcSYL_0106830	TcX10_chr15:397429-398600	DCT	TM	OK	853664	641637	-0.411912	-1.51489	0.00265	0.00443699	yes
XLOC_012160	XLOC_012160	TcSYL_0172540	TcX10_chr37:167216-167502	DCT	TM	OK	315194	186968	-0.753453	-1.51554	0.00355	0.00579517	yes
XLOC_017133	XLOC_017133	TcSYL_0046250	TcX10_chr5:477004-477407	DCT	TM	OK	313731	208085	-0.592355	-1.51714	0.00315	0.00519939	yes
XLOC_020503	XLOC_020503	TcSYL_0076430	TcX10_chr9:599559-600481	DCT	TM	OK	282836	208306	-0.441258	-1.51754	0.0029	0.00481932	yes
XLOC_002584	XLOC_002584	TcSYL_0089610	TcX10_chr12:289390-289646	DCT	TM	OK	945335	267141	-1.82322	-1.51801	0.00405	0.00653945	yes
XLOC_010529	XLOC_010529	TcSYL_0155900	TcX10_chr31:23805-25729	DCT	TM	OK	170994	127486	-0.423613	-1.51901	0.0027	0.00451172	yes
XLOC_020409	XLOC_020409	TcSYL_0075300	TcX10_chr9:376763-377586	DCT	TM	OK	398335	295495	-0.430851	-1.51974	0.0024	0.00405157	yes
XLOC_002101	XLOC_002101	TcSYL_0088600	TcX10_chr11:984651-985267	DCT	TM	OK	219317	151589	-0.53285	-1.51981	0.00245	0.00412861	yes
XLOC_008510	XLOC_008510	TcSYL_0142690	TcX10_chr27:303695-304197	DCT	TM	OK	785341	580797	-0.435284	-1.51998	0.0019	0.00325027	yes
XLOC_003045	XLOC_003045	TcSYL_0093670	TcX10_chr13:297337-298184	DCT	TM	OK	468567	276774	-0.759545	-1.51999	0.003	0.00497349	yes
XLOC_017876	XLOC_017876	TcSYL_0056880	TcX10_chr6:863297-863958	DCT	TM	OK	809981	497022	-0.704579	-1.52076	0.00245	0.00412861	yes
XLOC_018480	XLOC_018480	TcSYL_0057450	TcX10_chr6:1028067-1028482	DCT	TM	OK	236727	153289	-0.62697	-1.52214	0.0027	0.00451172	yes
XLOC_020220	XLOC_020220	TcSYL_0078670	TcX10_chr9:793782-794284	DCT	TM	OK	508205	367393	-0.468086	-1.52356	0.00175	0.00300795	yes
XLOC_006541	XLOC_006541	TcSYL_0122340	TcX10_chr21:346537-346985	DCT	TM	OK	184975	117606	-0.653365	-1.52445	0.0032	0.00526928	yes
XLOC_017639	XLOC_017639	TcSYL_0050770	TcX10_chr6:217651-218084	DCT	TM	OK	689273	501276	-0.459469	-1.52457	0.00295	0.00489597	yes
XLOC_002769	XLOC_002769	TcSYL_0094650	TcX10_chr13:427507-427955	DCT	TM	OK	114814	675955	-0.764306	-1.5251	0.0025	0.00420538	yes
XLOC_004530	XLOC_004530	TcSYL_0112420	TcX10_chr16:1412486-1412877	DCT	TM	OK	380176	258789	-0.554891	-1.52567	0.0025	0.00420538	yes
XLOC_000274	XLOC_000274	TcSYL_0004940	TcX10_chr1:1326621-1327234	DCT	TM	OK	177851	120607	-0.560361	-1.52601	0.0024	0.00405157	yes
XLOC_006371	XLOC_006371	TcSYL_0121940	TcX10_chr21:274388-274734	DCT	TM	OK	260332	158.62	-0.714779	-1.52907	0.0023	0.00389579	yes
XLOC_014648	XLOC_014648	TcSYL_0042300	TcX10_chr4:1212412-1212812	DCT	TM	OK	210968	502507	-2.0698	-1.53152	0.015	0.0220513	yes
XLOC_002197	XLOC_002197	TcSYL_0084200	TcX10_chr11:233585-233895	DCT	TM	OK	387359	243347	-0.670655	-1.53225	0.0028	0.00466235	yes
XLOC_001272	XLOC_001272	TcSYL_0010690	TcX10_chr1:2051810-2052297	DCT	TM	OK	159.9	101237	-0.659438	-1.53358	0.00245	0.00412861	yes
XLOC_004720	XLOC_004720	TcSYL_0112840	TcX10_chr18:109162-109640	DCT	TM	OK	340834	237083	-0.523678	-1.53398	0.00205	0.00349345	yes
XLOC_001621	XLOC_001621	TcSYL_0082930	TcX10_chr10:920485-920891	DCT	TM	OK	480357	334279	-0.523055	-1.53531	0.00245	0.00412861	yes
XLOC_013131	XLOC_013131	TcSYL_0179850	TcX10_chr39:137337-138193	DCT	TM	OK	297667	217.79	-0.450763	-1.53572	0.00275	0.00458818	yes
XLOC_001798	XLOC_001798	TcSYL_0084320	TcX10_chr11:287622-288085	DCT	TM	OK	267448	179826	-0.572654	-1.53643	0.0019	0.00325027	yes
XLOC_014661	XLOC_014661	TcSYL_0042460	TcX10_chr4:1223252-1224429	DCT	TM	OK	203458	148931	-0.450085	-1.53676	0.0026	0.00435906	yes
XLOC_013538	XLOC_013538	TcSYL_0033600	TcX10_chr4:273988-274592	DCT	TM	OK	875645	11595	-2.91684	-1.5369	0.0248	0.0352993	yes
XLOC_006524	XLOC_006524	TcSYL_0122170	TcX10_chr21:292036-293348	DCT	TM	OK	246697	182496	-0.434878	-1.53815	0.0024	0.00405157	yes
XLOC_010724	XLOC_010724	TcSYL_0159050	TcX10_chr32:547689-548251	DCT	TM	OK	208943	141442	-0.562893	-1.53891	0.00195	0.00333279	yes
XLOC_013083	XLOC_013083	TcSYL_0179200	TcX10_chr39:75689-76467	DCT	TM	OK	133687	908724	-0.556945	-1.54106	0.0025	0.00420538	yes
XLOC_008641	XLOC_008641	TcSYL_0145820	TcX10_chr28:355874-356586	DCT	TM	OK	160358	110363	-0.539034	-1.54282	0.00255	0.00428282	yes
XLOC_000699	XLOC_000699	TcSYL_0014040	TcX10_chr1:2932527-2933200	DCT	TM	OK	166281	113213	-0.554581	-1.54371	0.00205	0.00349345	yes
XLOC_011294	XLOC_011294	TcSYL_0163390	TcX10_chr33:332593-333080	DCT	TM	OK	152328	96044	-0.665409	-1.54615	0.002	0.00341362	yes
XLOC_017332	XLOC_017332	TcSYL_0045040	TcX10_chr5:83714-84471	DCT	TM	OK	134778	911703	-0.563949	-1.54729	0.00215	0.00365399	yes
XLOC_003718	XLOC_003718	TcSYL_0102320	TcX10_chr14:805107-806002	DCT	TM	OK	176583	124606	-0.502977	-1.54996	0.0017	0.00292733	yes
XLOC_005862	XLOC_005862	TcSYL_0019460	TcX10_chr2:832258-833003	DCT	TM	OK	277266	199267	-0.47657	-1.55169	0.0014	0.00244073	yes
XLOC_011142	XLOC_011142	TcSYL_0160180	TcX10_chr33:50712-56038	DCT	TM	OK	330226	237272	-0.476915	-1.55908	0.0017	0.00292733	yes
XLOC_012173	XLOC_012173	TcSYL_0172700	TcX10_chr37:178568-179772	DCT	TM	OK	247389	181796	-0.444459	-1.55912	0.00175	0.00300795	yes
XLOC_019974	XLOC_019974	TcSYL_0072590	TcX10_chr8:199796-200442	DCT	TM	OK	823945	498524	-0.724886	-1.56044	0.00225	0.00381537	yes
XLOC_012934	XLOC_012934	TcSYL_0181710	TcX10_chr39:322672-323432	DCT	TM	OK	398364	291214	-0.452008	-1.56164	0.0014	0.00244073	yes
XLOC_016624	XLOC_016624	TcSYL_0201940	TcX10_chr45:82031-83214	DCT	TM	OK	2180.99	510073	-5.41813	-1.56201	5e-05	0.000105404	yes
XLOC_003270	XLOC_003270	TcSYL_0097580	TcX10_chr13:750713-751380	DCT	TM	OK	452854	329596	-0.458349	-1.56253	0.00195	0.00333279	yes
XLOC_003303	XLOC_003303	TcSYL_0098000	TcX10_chr13:779162-779457	DCT	TM	OK	1004.62	700074	-0.521067	-1.56373	0.0026	0.00435906	yes
XLOC_003721	XLOC_003721	TcSYL_0102350	TcX10_chr14:807924-808252	DCT	TM	OK	463797	305419	-0.602705	-1.56567	0.00185	0.00317191	yes
XLOC_010752	XLOC_010752	TcSYL_0159710	TcX10_chr32:813912-814357	DCT	TM	OK	304926	203377	-0.5843	-1.56847	0.0017	0.00292733	yes
XLOC_002673	XLOC_002673	TcSYL_0092000	TcX10_chr12:898334-898836	DCT	TM	OK	151607	956484	-0.664523	-1.56916	0.0014	0.00244073	yes
XLOC_008176	XLOC_008176	TcSYL_0140500	TcX10_chr26:450839-451275	DCT	TM	OK	1126.36	828867	-0.44246	-1.57008	0.00215	0.00365399	yes
XLOC_011559	XLOC_011559	TcSYL_0165400	TcX10_chr34:442587-442792	DCT	TM	OK	482381	181823	-1.40764	-1.5713	0.0074	0.0114456	yes
XLOC_013680	XLOC_013680	TcSYL_0036060	TcX10_chr4:437729-438429	DCT	TM	OK	807555	0.853497	-3.2421	-1.57231	0.026	0.0368548	yes
XLOC_011747	XLOC_011747	TcSYL_0167300	TcX10_chr35:353856-354322	DCT	TM	OK	153588	953627	-0.687569	-1.57354	0.0019	0.00325027	yes
XLOC_000749	XLOC_000749	TcSYL_0014540	TcX10_chr1:3070437-3072274	DCT	TM	OK	973993	698192	-0.480288	-1.5743	0.00155	0.00268615	yes
XLOC_005047	XLOC_005047	TcSYL_0115260	TcX10_chr19:281223-282244	DCT	TM	OK	559968	353865	-0.662145	-1.57523	0.00235	0.00397515	yes
XLOC_018695	XLOC_018695	TcSYL_0062060	TcX10_chr7:174503-174846	DCT	TM	OK	767916	534931	-0.521595	-1.57703	0.00135	0.00236117	yes
XLOC_008647	XLOC_008647	TcSYL_0145910	TcX10_chr28:360196-360446	DCT	TM	OK	171001	884541	-0.951007	-1.57843	0.03575	0.0493265	yes
XLOC_017475	XLOC_017475	TcSYL_0048160	TcX10_chr5:1084803-1085074	DCT	TM	OK	386487	220662	-0.80858	-1.57948	0.00275	0.00458818	yes
XLOC_000813	XLOC_000813	TcSYL_0000900	TcX10_chr1:353095-353456	DCT	TM	OK	451628	301407	-0.583422	-1.58011	0.0015	0.00260486	yes
XLOC_009496	XLOC_009496	TcSYL_0022770	TcX10_chr3:176816-177261	DCT	TM	OK	378.05	262499	-0.526262	-1.58121	0.00175	0.00300795	yes
XLOC_008390	XLOC_008390	TcSYL_0141680	TcX10_chr27:29201-29856	DCT	TM	OK	327.85	233615	-0.488906	-1.58234	0.00185	0.00317191	yes
XLOC_002334	XLOC_002334	TcSYL_0088850	TcX10_chr11:1034410-1034828	DCT	TM	OK	973752	509399	-0.934758	-1.58259	0.002	0.00341362	yes
XLOC_013685	XLOC_013685	TcSYL_0036110	TcX10_chr4:441811-442466	DCT	TM	OK	88316	150289	-2.55494	-1.58281	0.01985	0.0286525	yes
XLOC_013688	XLOC_013688	TcSYL_0036160	TcX10_chr4:445898-446514	DCT	TM	OK	95472	165936	-2.52445	-1.58334	0.0145	0.0213869	yes
XLOC_004656	XLOC_004656	TcSYL_0110820	TcX10_chr16:871228-871808	DCT	TM	OK	523254	379651	-0.462837	-1.5841	0.00135	0.00236117	yes
XLOC_002406	XLOC_002406	TcSYL_0089950	TcX10_chr12:310643-311094	DCT	TM	OK	267117	176708	-0.596106	-1.58559	0.0012	0.00211643	yes
XLOC_005033	XLOC_005033	TcSYL_0115110	TcX10_chr19:245820-246514	DCT	TM	OK	365273	262999	-0.473916	-1.58645	0.00105	0.00186798	yes
XLOC_011735	XLOC_011735	TcSYL_0167180	TcX10_chr35:326290-326735	DCT	TM	OK	200133	127299	-0.652741	-1.58798	0.0018	0.00309108	yes
XLOC_006526	XLOC_006526	TcSYL_0122190	TcX10_chr21:294534-295009	DCT	TM	OK	348798	239228	-0.544008	-1.58937	0.00175	0.00300795	yes
XLOC_017594	XLOC_017594	TcSYL_0050220	TcX10_chr6:116720-116970	DCT	TM	OK	391228	209808	-0.898941	-1.59203	0.0061	0.0095441	yes
XLOC_004958	XLOC_004958	TcSYL_0115550	TcX10_chr19:414452-415215	DCT	TM	OK	327625	236168	-0.472232	-1.59417	0.00135	0.00236117	yes
XLOC_012426	XLOC_012426	TcSYL_0174370	TcX10_chr37:326418-327700	DCT	TM	OK	188.75	136562	-0.466924	-1.59575	0.0016	0.00276773	yes
XLOC_003782	XLOC_003782	TcSYL_0103290	TcX10_chr14:864122-864519	DCT	TM	OK	221522	137129	-0.691911	-1.59621	0.00135	0.00236117	yes
XLOC_004668	XLOC_004668	TcSYL_0110940	TcX10_chr16:910822-912110	DCT	TM	OK	246148	179794	-0.453177	-1.59717	0.00155	0.00268615	yes
XLOC_005073	XLOC_005073	TcSYL_0116020	TcX10_chr19:553286-553758	DCT	TM	OK	244051	160229	-0.607048	-1.59868	0.0019	0.00325027	yes
XLOC_001311	XLOC_001311	TcSYL_0011090	TcX10_chr1:2183312-2184246	DCT	TM	OK	156327	108576	-0.525866	-1.60022	0.00125	0.00219898	yes
XLOC_008201	XLOC_008201	TcSYL_0140790	TcX10_chr26:514554-515908	DCT	TM	OK	757415	558746	-0.438892	-1.60057	0.0016	0.00276773	yes
XLOC_012125	XLOC_012125	TcSYL_0172090	TcX10_chr37:132866-135519	DCT	TM	OK	202298	149644	-0.434949	-1.60453	0.0014	0.00244073	yes
XLOC_004980	XLOC_004980	TcSYL_0115790	TcX10_chr19:477615-478003	DCT	TM	OK	490805	334514	-0.553086	-1.60763	0.0016	0.00276773	yes
XLOC_000526	XLOC_000526	TcSYL_0010310	TcX10_chr1:1997069-1997436	DCT	TM	OK	177.93	101894	-0.804235	-1.60879	0.0011	0.00195143	yes
XLOC_004309	XLOC_004309	TcSYL_0108710	TcX10_chr15:870615-871222	DCT	TM	OK	342545	241168	-0.506253	-1.61083	0.0008	0.00145085	yes
XLOC_012071	XLOC_012071	TcSYL_0171040	TcX10_chr36:449905-450257	DCT	TM	OK	243317	145431	-0.742504	-1.61146	0.00185	0.00317191	yes
XLOC_014680	XLOC_014680	TcSYL_0042710	TcX10_chr4:1241600-1241925	DCT	TM	OK	362528	224493	-0.691424	-1.61292	0.0017	0.00292733	yes
XLOC_012401	XLOC_012401	TcSYL_0174050	TcX10_chr37:302540-303051	DCT	TM	OK	297981	201763	-0.562559	-1.61464	0.0008	0.00145085	yes
XLOC_008265	XLOC_008265	TcSYL_0139500	TcX10_chr26:179567-179991	DCT	TM	OK	795375	383922	-1.05082	-1.61467	0.0026	0.00435906	yes
XLOC_016713	XLOC_016713	TcSYL_0202420	TcX10_chr45:219161-219714	DCT	TM	OK	264358	178.96	-0.562856	-1.61582	0.0011	0.00195143	yes
XLOC_012003	XLOC_012003	TcSYL_0171120	TcX10_chr36:477449-478194	DCT	TM	OK	259.54	183148	-0.502948	-1.61766	0.0011	0.00195143	yes
XLOC_016581	XLOC_016581	TcSYL_0201340	TcX10_chr44:245700-245965	DCT	TM	OK	520457	305464	-0.768775	-1.61811	0.0021	0.00357302	yes
XLOC_006233	XLOC_006233	TcSYL_0118360	TcX10_chr20:309135-309550	DCT	TM	OK	297682	193498	-0.621455	-1.62338	0.0016	0.00276773	yes
XLOC_002608	XLOC_002608	TcSYL_0090320	TcX10_chr12:335874-336499	DCT	TM	OK	168302	109965	-0.614005	-1.62603	0.00165	0.00284836	yes
XLOC_005877	XLOC_005877	TcSYL_0019610	TcX10_chr2:871110-871960	DCT	TM	OK	272639	194295	-0.488738	-1.62626	0.0008	0.00145085	yes
XLOC_013651	XLOC_013651	TcSYL_0035620	TcX10_chr4:408588-409321	DCT	TM	OK	670289	106326	-2.65629	-1.63097	0.0193	0.0278905	yes
XLOC_011739	XLOC_011739	TcSYL_0167220	TcX10_chr35:340015-341972	DCT	TM	OK	132677	96002	-0.466784	-1.63201	0.00145	0.00252209	yes
XLOC_002672	XLOC_002672	TcSYL_0091990	TcX10_chr12:897738-898177	DCT	TM	OK	152053	899944	-0.75667	-1.63317	0.0014	0.00244073	yes
XLOC_004801	XLOC_004801	TcSYL_0114260	TcX10_chr18:536167-536645	DCT	TM	OK	500.54	350487	-0.514122	-1.63447	0.001	0.00178322	yes
XLOC_000190	XLOC_000190	TcSYL_0004020	TcX10_chr1:1085399-1085874	DCT	TM	OK	149.53	898243	-0.735253	-1.63499	0.00085	0.00153162	yes
XLOC_000547	XLOC_000547	TcSYL_0010590	TcX10_chr1:2016445-2017448	DCT	TM	OK	254137	182188	-0.480182	-1.63665	0.00125	0.00219898	yes
XLOC_013852	XLOC_013852	TcSYL_0038920	TcX10_chr4:769002-769252	DCT	TM	OK	850935	284298	-1.58165	-1.63781	0.01895	0.0274213	yes
XLOC_015368	XLOC_015368	TcSYL_0187680	TcX10_chr41:113401-113870	DCT	TM	OK	248328	160285	-0.63161	-1.63858	0.0014	0.00244073	yes
XLOC_018736	XLOC_018736	TcSYL_0062650	TcX10_chr7:237295-237707	DCT	TM	OK	176662	26252	-2.75049	-1.64281	0.0296	0.0414915	yes
XLOC_007410	XLOC_007410	TcSYL_0131500	TcX10_chr23:544906-545546	DCT	TM	OK	157249	102414	-0.618637	-1.64413	0.00105	0.00186798	yes
XLOC_001460	XLOC_001460	TcSYL_0013980	TcX10_chr1:2888818-2889659	DCT	TM	OK	275619	195343	-0.496669	-1.64418	0.0013	0.00228163	yes
XLOC_017112	XLOC_017112	TcSYL_0045990	TcX10_chr5:396347-396942	DCT	TM	OK	126115	778639	-0.695709	-1.64444	0.001	0.00178322	yes
XLOC_016235	XLOC_016235	TcSYL_0196460	TcX10_chr43:132528-132865	DCT	TM	OK	181065	971376	-0.898407	-1.64458	0.0009	0.00161633	yes
XLOC_016601	XLOC_016601	TcSYL_0201540	TcX10_chr44:314773-317027	DCT	TM	OK	146863	106884	-0.458424	-1.64499	0.00105	0.00186798	yes
XLOC_011280	XLOC_011280	TcSYL_0163170	TcX10_chr33:322752-323632	DCT	TM	OK	153892	104696	-0.555715	-1.64977	0.0011	0.00195143	yes
XLOC_009659	XLOC_009659	TcSYL_0027100	TcX10_chr3:1127868-1128367	DCT	TM	OK	400135	279314	-0.5186	-1.65094	0.00135	0.00236117	yes
XLOC_014757	XLOC_014757	TcSYL_0043690	TcX10_chr4:1335504-1337110	DCT	TM	OK	272.44	199012	-0.453081	-1.65217	0.0008	0.00145085	yes
XLOC_005007	XLOC_005007	TcSYL_0117130	TcX10_chr19:737692-737957	DCT	TM	OK	702463	428979	-0.711516	-1.65297	0.0017	0.00292733	yes
XLOC_010632	XLOC_010632	TcSYL_0157120	TcX10_chr31:534256-534584	DCT	TM	OK	87687	340595	-1.3643	-1.65362	0.00145	0.00252209	yes
XLOC_011734	XLOC_011734	TcSYL_0167170	TcX10_chr35:325688-326169	DCT	TM	OK	218.43	139.02	-0.651885	-1.6623	0.00095	0.00170007	yes
XLOC_000224	XLOC_000224	TcSYL_0004360	TcX10_chr1:1162309-1163693	DCT	TM	OK	93311	636044	-0.55292	-1.66397	0.00055	0.00102321	yes
XLOC_001834	XLOC_001834	TcSYL_0084880	TcX10_chr11:352739-353070	DCT	TM	OK	782026	529393	-0.562877	-1.66512	0.0007	0.00128364	yes
XLOC_012287	XLOC_012287	TcSYL_0174870	TcX10_chr37:491272-491873	DCT	TM	OK	398371	178301	-1.1598	-1.66788	0.00165	0.00284836	yes
XLOC_010656	XLOC_010656	TcSYL_0157210	TcX10_chr32:89467-90623	DCT	TM	OK	867433	280095	-1.63084	-1.66872	0.0027	0.00451172	yes
XLOC_004462	XLOC_004462	TcSYL_0111730	TcX10_chr16:1175101-1176698	DCT	TM	OK	802683	546392	-0.554893	-1.66966	0.0008	0.00145085	yes
XLOC_001966	XLOC_001966	TcSYL_0086660	TcX10_chr11:622523-624360	DCT	TM	OK	665515	449983	-0.564602	-1.67047	0.0005	0.000936402	yes
XLOC_000574	XLOC_000574	TcSYL_0011620	TcX10_chr1:2363584-2364017	DCT	TM	OK	184.79	112269	-0.718933	-1.67048	0.0015	0.00260486	yes
XLOC_014984	XLOC_014984	TcSYL_0183650	TcX10_chr40:31102-31781	DCT	TM	OK	251296	984176	-1.3524	-1.67103	0.0022	0.00373645	yes
XLOC_004211	XLOC_004211	TcSYL_0107410	TcX10_chr15:625749-626221	DCT	TM	OK	476629	329295	-0.533486	-1.67201	0.00045	0.000846532	yes
XLOC_010872	XLOC_010872	TcSYL_0158420	TcX10_chr32:503562-504064	DCT	TM	OK	384908	263.9	-0.544519	-1.67358	0.00075	0.00136903	yes
XLOC_004950	XLOC_004950	TcSYL_0115470	TcX10_chr19:369098-369579	DCT	TM	OK	351548	236165	-0.573931	-1.67451	0.00095	0.00170007	yes
XLOC_000693	XLOC_000693	TcSYL_0013570	TcX10_chr1:2708985-2709400	DCT	TM	OK	589163	407656	-0.531316	-1.67771	0.00085	0.00153162	yes
XLOC_016761	XLOC_016761	TcSYL_0203250	TcX10_chr46:251086-251837	DCT	TM	OK	275575	192.89	-0.514665	-1.67776	0.00095	0.00170007	yes
XLOC_001474	XLOC_001474	TcSYL_0080630	TcX10_chr10:265445-265668	DCT	TM	OK	2053.42	1319.12	-0.638459	-1.67883	0.0031	0.00512804	yes
XLOC_017349	XLOC_017349	TcSYL_0045220	TcX10_chr5:189199-190070	DCT	TM	OK	282154	199886	-0.497304	-1.67892	0.00085	0.00153162	yes
XLOC_015195	XLOC_015195	TcSYL_0188370	TcX10_chr41:248105-248379	DCT	TM	OK	208132	927339	-1.16633	-1.6807	0.00095	0.00170007	yes
XLOC_005799	XLOC_005799	TcSYL_0018420	TcX10_chr2:560094-560995	DCT	TM	OK	906783	218952	-2.05014	-1.68245	0.00765	0.0118057	yes
XLOC_010751	XLOC_010751	TcSYL_0159700	TcX10_chr32:804704-805275	DCT	TM	OK	150434	942357	-0.674788	-1.68294	0.00095	0.00170007	yes
XLOC_016754	XLOC_016754	TcSYL_0203180	TcX10_chr46:232733-233079	DCT	TM	OK	172819	100787	-0.777956	-1.6851	0.00525	0.00829998	yes
XLOC_000744	XLOC_000744	TcSYL_0014490	TcX10_chr1:3062265-3063004	DCT	TM	OK	560486	308282	-0.862425	-1.68985	0.00135	0.00236117	yes
XLOC_007516	XLOC_007516	TcSYL_0132900	TcX10_chr23:655164-656578	DCT	TM	OK	130792	910784	-0.522095	-1.69058	0.00085	0.00153162	yes
XLOC_017141	XLOC_017141	TcSYL_0046330	TcX10_chr5:498268-498983	DCT	TM	OK	433429	308114	-0.492334	-1.69068	0.00055	0.00102321	yes
XLOC_002544	XLOC_002544	TcSYL_0092270	TcX10_chr12:972141-972805	DCT	TM	OK	139876	892006	-0.649022	-1.69099	0.0009	0.00161633	yes
XLOC_006497	XLOC_006497	TcSYL_0121790	TcX10_chr21:207271-207704	DCT	TM	OK	298469	191723	-0.638556	-1.69233	0.00115	0.00203727	yes
XLOC_011229	XLOC_011229	TcSYL_0162390	TcX10_chr33:277884-278872	DCT	TM	OK	332722	238982	-0.477414	-1.69235	0.0008	0.00145085	yes
XLOC_006529	XLOC_006529	TcSYL_0122220	TcX10_chr21:297422-298485	DCT	TM	OK	690214	436035	-0.662601	-1.69289	0.0013	0.00228163	yes
XLOC_004424	XLOC_004424	TcSYL_0111220	TcX10_chr16:1047460-1048151	DCT	TM	OK	128.54	80699	-0.671598	-1.69295	0.0012	0.00211643	yes
XLOC_017414	XLOC_017414	TcSYL_0047550	TcX10_chr5:896420-898167	DCT	TM	OK	268013	193743	-0.468157	-1.69913	0.00085	0.00153162	yes
XLOC_001287	XLOC_001287	TcSYL_0010840	TcX10_chr1:2102514-2102938	DCT	TM	OK	251212	156868	-0.679352	-1.7021	0.00085	0.00153162	yes
XLOC_017455	XLOC_017455	TcSYL_0047960	TcX10_chr5:1003275-1003594	DCT	TM	OK	249985	137.05	-0.867137	-1.70332	0.0004	0.000757937	yes
XLOC_017239	XLOC_017239	TcSYL_0047400	TcX10_chr5:850433-851346	DCT	TM	OK	666961	106116	-2.65196	-1.70383	0.0135	0.0200408	yes
XLOC_015256	XLOC_015256	TcSYL_0189140	TcX10_chr41:308134-309515	DCT	TM	OK	248268	178285	-0.477715	-1.70583	0.0006	0.00110941	yes
XLOC_005631	XLOC_005631	TcSYL_0022330	TcX10_chr2:1736249-1737207	DCT	TM	OK	211831	944504	-1.16528	-1.70808	0.0028	0.00466235	yes
XLOC_007752	XLOC_007752	TcSYL_0137860	TcX10_chr24:629181-629737	DCT	TM	OK	167952	105086	-0.676473	-1.70864	0.00045	0.000846532	yes
XLOC_006499	XLOC_006499	TcSYL_0121820	TcX10_chr21:216084-216679	DCT	TM	OK	1781.54	1288.55	-0.46737	-1.70867	0.00055	0.00102321	yes
XLOC_008085	XLOC_008085	TcSYL_0138700	TcX10_chr25:196722-197053	DCT	TM	OK	423976	261069	-0.69955	-1.70915	0.0006	0.00110941	yes
XLOC_006502	XLOC_006502	TcSYL_0121850	TcX10_chr21:238898-240105	DCT	TM	OK	357759	258217	-0.470407	-1.71144	0.00055	0.00102321	yes
XLOC_017476	XLOC_017476	TcSYL_0048170	TcX10_chr5:1088589-1088947	DCT	TM	OK	262801	153869	-0.772268	-1.7128	0.00075	0.00136903	yes
XLOC_007498	XLOC_007498	TcSYL_0132630	TcX10_chr23:619073-619941	DCT	TM	OK	266168	186413	-0.513841	-1.71534	0.00085	0.00153162	yes
XLOC_000914	XLOC_000914	TcSYL_0002990	TcX10_chr1:873758-874020	DCT	TM	OK	147285	501882	-1.55319	-1.71782	0.00085	0.00153162	yes
XLOC_002217	XLOC_002217	TcSYL_0084670	TcX10_chr11:321149-321717	DCT	TM	OK	354.66	242331	-0.549455	-1.71793	0.0006	0.00110941	yes
XLOC_012285	XLOC_012285	TcSYL_0174850	TcX10_chr37:488878-489674	DCT	TM	OK	216813	842003	-1.36455	-1.71827	0.0027	0.00451172	yes
XLOC_012414	XLOC_012414	TcSYL_0174220	TcX10_chr37:314089-314837	DCT	TM	OK	149536	974605	-0.617604	-1.71937	0.00035	0.000666532	yes
XLOC_001669	XLOC_001669	TcSYL_0080310	TcX10_chr10:107905-108173	DCT	TM	OK	764234	477171	-0.679507	-1.72028	0.00145	0.00252209	yes
XLOC_004508	XLOC_004508	TcSYL_0112200	TcX10_chr16:1320660-1321087	DCT	TM	OK	332266	214506	-0.631317	-1.72099	0.0009	0.00161633	yes
XLOC_006447	XLOC_006447	TcSYL_0123620	TcX10_chr21:597943-599039	DCT	TM	OK	284987	202.89	-0.490196	-1.72324	0.00045	0.000846532	yes
XLOC_013531	XLOC_013531	TcSYL_0033460	TcX10_chr4:263903-264960	DCT	TM	OK	459455	0.686266	-2.74308	-1.7253	0.01735	0.0252218	yes
XLOC_002326	XLOC_002326	TcSYL_0088400	TcX10_chr11:898270-898613	DCT	TM	OK	669506	444462	-0.591036	-1.72701	0.0005	0.000936402	yes
XLOC_011903	XLOC_011903	TcSYL_0169980	TcX10_chr36:224850-225634	DCT	TM	OK	177787	118757	-0.582135	-1.72801	0.00055	0.00102321	yes
XLOC_014868	XLOC_014868	TcSYL_0184820	TcX10_chr40:178972-179432	DCT	TM	OK	17764	270806	-2.71362	-1.72841	0.0085	0.013014	yes
XLOC_015668	XLOC_015668	TcSYL_0194360	TcX10_chr42:763317-764146	DCT	TM	OK	188778	127249	-0.56903	-1.72854	0.0006	0.00110941	yes
XLOC_010659	XLOC_010659	TcSYL_0157520	TcX10_chr32:449154-449365	DCT	TM	OK	142384	452176	-1.65483	-1.72908	0.0171	0.0248967	yes
XLOC_002530	XLOC_002530	TcSYL_0091840	TcX10_chr12:615636-615943	DCT	TM	OK	247959	130786	-0.922897	-1.72964	0.00075	0.00136903	yes
XLOC_013043	XLOC_013043	TcSYL_0178660	TcX10_chr39:17858-18429	DCT	TM	OK	210333	135.7	-0.632251	-1.7329	0.0005	0.000936402	yes
XLOC_010725	XLOC_010725	TcSYL_0159100	TcX10_chr32:550386-550645	DCT	TM	OK	554154	313169	-0.823346	-1.73402	0.0008	0.00145085	yes
XLOC_008665	XLOC_008665	TcSYL_0146120	TcX10_chr28:408249-408562	DCT	TM	OK	653384	417139	-0.647401	-1.73452	0.0006	0.00110941	yes
XLOC_010935	XLOC_010935	TcSYL_0159420	TcX10_chr32:623122-623579	DCT	TM	OK	106417	562985	-0.918563	-1.73588	0.0008	0.00145085	yes
XLOC_012836	XLOC_012836	TcSYL_0180130	TcX10_chr39:165321-165955	DCT	TM	OK	106096	631622	-0.748241	-1.73769	0.00085	0.00153162	yes
XLOC_007310	XLOC_007310	TcSYL_0129730	TcX10_chr23:281617-282461	DCT	TM	OK	973257	604025	-0.688212	-1.74117	0.0009	0.00161633	yes
XLOC_019382	XLOC_019382	TcSYL_0063490	TcX10_chr7:590775-590995	DCT	TM	OK	43269.5	589178	-6.1985	-1.74146	5e-05	0.000105404	yes
XLOC_010587	XLOC_010587	TcSYL_0156610	TcX10_chr31:364348-364724	DCT	TM	OK	445.98	288443	-0.628691	-1.74381	0.00035	0.000666532	yes
XLOC_017195	XLOC_017195	TcSYL_0046950	TcX10_chr5:665355-665659	DCT	TM	OK	467962	286006	-0.710349	-1.74426	0.00085	0.00153162	yes
XLOC_015425	XLOC_015425	TcSYL_0189220	TcX10_chr41:313116-313531	DCT	TM	OK	194989	113458	-0.781232	-1.74493	0.00045	0.000846532	yes
XLOC_000981	XLOC_000981	TcSYL_0005050	TcX10_chr1:1345299-1345627	DCT	TM	OK	304813	175183	-0.799059	-1.74637	0.00055	0.00102321	yes
XLOC_010890	XLOC_010890	TcSYL_0158740	TcX10_chr32:523384-524069	DCT	TM	OK	270305	183201	-0.561161	-1.75057	0.0004	0.000757937	yes
XLOC_001876	XLOC_001876	TcSYL_0085470	TcX10_chr11:396088-396329	DCT	TM	OK	541089	267557	-1.01602	-1.75123	0.00065	0.0011963	yes
XLOC_001615	XLOC_001615	TcSYL_0082340	TcX10_chr10:555320-555900	DCT	TM	OK	552102	388168	-0.508251	-1.75316	0.0006	0.00110941	yes
XLOC_013683	XLOC_013683	TcSYL_0036090	TcX10_chr4:439769-440385	DCT	TM	OK	117237	105231	-3.4778	-1.75471	0.0169	0.0246197	yes
XLOC_014712	XLOC_014712	TcSYL_0043130	TcX10_chr4:1294854-1295734	DCT	TM	OK	136401	889881	-0.616169	-1.75626	0.0003	0.000575222	yes
XLOC_002562	XLOC_002562	TcSYL_0092450	TcX10_chr12:1034481-1036048	DCT	TM	OK	280262	154836	-0.856041	-1.76168	0.00055	0.00102321	yes
XLOC_001451	XLOC_001451	TcSYL_0013890	TcX10_chr1:2851239-2852395	DCT	TM	OK	264312	186126	-0.505962	-1.76454	0.00065	0.0011963	yes
XLOC_017564	XLOC_017564	TcSYL_0049750	TcX10_chr5:1300886-1301373	DCT	TM	OK	420381	153585	-1.45266	-1.76458	0.00155	0.00268615	yes
XLOC_008189	XLOC_008189	TcSYL_0140670	TcX10_chr26:492873-493243	DCT	TM	OK	708613	473.59	-0.581359	-1.76702	0.00055	0.00102321	yes
XLOC_002858	XLOC_002858	TcSYL_0096050	TcX10_chr13:641718-642217	DCT	TM	OK	160706	950627	-0.757471	-1.76771	0.0006	0.00110941	yes
XLOC_008316	XLOC_008316	TcSYL_0140060	TcX10_chr26:357486-358825	DCT	TM	OK	423.52	303999	-0.478367	-1.76993	0.0004	0.000757937	yes
XLOC_016583	XLOC_016583	TcSYL_0201360	TcX10_chr44:252727-254021	DCT	TM	OK	311.78	222195	-0.488705	-1.77045	0.00045	0.000846532	yes
XLOC_016220	XLOC_016220	TcSYL_0196160	TcX10_chr43:108949-109190	DCT	TM	OK	303815	170122	-0.836619	-1.77422	0.0283	0.0398464	yes
XLOC_005231	XLOC_005231	TcSYL_0015080	TcX10_chr2:231883-232232	DCT	TM	OK	1159.28	800652	-0.533978	-1.77457	0.0007	0.00128364	yes
XLOC_004212	XLOC_004212	TcSYL_0107430	TcX10_chr15:626556-626992	DCT	TM	OK	311396	197491	-0.656964	-1.77566	0.0009	0.00161633	yes
XLOC_001796	XLOC_001796	TcSYL_0084300	TcX10_chr11:282035-283605	DCT	TM	OK	167291	117403	-0.510886	-1.77617	0.00025	0.000484755	yes
XLOC_013822	XLOC_013822	TcSYL_0038390	TcX10_chr4:627285-627640	DCT	TM	OK	322599	599403	-2.42814	-1.77831	0.0065	0.0101343	yes
XLOC_015240	XLOC_015240	TcSYL_0188950	TcX10_chr41:292447-292925	DCT	TM	OK	128905	73359	-0.813265	-1.78106	0.00065	0.0011963	yes
XLOC_009276	XLOC_009276	TcSYL_0026420	TcX10_chr3:1032794-1033041	DCT	TM	OK	1539.8	984242	-0.645661	-1.7838	0.001	0.00178322	yes
XLOC_000837	XLOC_000837	TcSYL_0001450	TcX10_chr1:575137-575519	DCT	TM	OK	270819	160394	-0.755708	-1.78402	0.00065	0.0011963	yes
XLOC_014609	XLOC_014609	TcSYL_0041680	TcX10_chr4:1165267-1165667	DCT	TM	OK	258037	522296	-2.30464	-1.78469	0.0081	0.0124393	yes
XLOC_000333	XLOC_000333	TcSYL_0005740	TcX10_chr1:1390121-1390422	DCT	TM	OK	153233	640778	-1.25783	-1.78661	0.00045	0.000846532	yes
XLOC_010726	XLOC_010726	TcSYL_0159110	TcX10_chr32:550847-551256	DCT	TM	OK	416927	268241	-0.636268	-1.78808	0.00035	0.000666532	yes
XLOC_013686	XLOC_013686	TcSYL_0036140	TcX10_chr4:443788-444470	DCT	TM	OK	926924	108359	-3.09663	-1.79079	0.0155	0.0227157	yes
XLOC_003162	XLOC_003162	TcSYL_0096060	TcX10_chr13:642736-644138	DCT	TM	OK	112151	754746	-0.571379	-1.79529	0.00025	0.000484755	yes
XLOC_013480	XLOC_013480	TcSYL_0032620	TcX10_chr4:210452-211152	DCT	TM	OK	101426	0.897493	-3.49838	-1.79604	0.02595	0.0367909	yes
XLOC_019384	XLOC_019384	TcSYL_0063510	TcX10_chr7:595261-595703	DCT	TM	OK	1813.71	1293.63	-0.487517	-1.79766	0.0002	0.000392633	yes
XLOC_005205	XLOC_005205	TcSYL_0014820	TcX10_chr2:107521-107996	DCT	TM	OK	200.27	119973	-0.739236	-1.80187	0.0005	0.000936402	yes
XLOC_002522	XLOC_002522	TcSYL_0091760	TcX10_chr12:568096-569132	DCT	TM	OK	882442	552061	-0.676673	-1.80699	0.00045	0.000846532	yes
XLOC_018708	XLOC_018708	TcSYL_0062190	TcX10_chr7:197022-197389	DCT	TM	OK	1315.4	908716	-0.533596	-1.81361	0.00025	0.000484755	yes
XLOC_001896	XLOC_001896	TcSYL_0085920	TcX10_chr11:432886-433715	DCT	TM	OK	881172	0.689568	-3.67566	-1.81482	0.02305	0.0330321	yes
XLOC_005212	XLOC_005212	TcSYL_0014890	TcX10_chr2:140862-141427	DCT	TM	OK	355063	237.38	-0.580875	-1.81494	0.00025	0.000484755	yes
XLOC_000935	XLOC_000935	TcSYL_0003260	TcX10_chr1:922632-923134	DCT	TM	OK	291883	188741	-0.628981	-1.81655	0.00025	0.000484755	yes
XLOC_012135	XLOC_012135	TcSYL_0172190	TcX10_chr37:144783-145456	DCT	TM	OK	275342	183283	-0.587155	-1.82121	0.00025	0.000484755	yes
XLOC_005364	XLOC_005364	TcSYL_0017160	TcX10_chr2:465464-465858	DCT	TM	OK	815597	554242	-0.557342	-1.82124	0.0002	0.000392633	yes
XLOC_013827	XLOC_013827	TcSYL_0038440	TcX10_chr4:670709-671208	DCT	TM	OK	173855	102735	-0.758964	-1.82161	5e-05	0.000105404	yes
XLOC_001319	XLOC_001319	TcSYL_0011170	TcX10_chr1:2206285-2206901	DCT	TM	OK	249931	163221	-0.6147	-1.823	0.00025	0.000484755	yes
XLOC_008294	XLOC_008294	TcSYL_0139790	TcX10_chr26:302249-303273	DCT	TM	OK	280957	195382	-0.524054	-1.82606	0.00015	0.000298501	yes
XLOC_003973	XLOC_003973	TcSYL_0104190	TcX10_chr15:122767-123041	DCT	TM	OK	606954	355597	-0.771344	-1.8268	0.0004	0.000757937	yes
XLOC_007283	XLOC_007283	TcSYL_0129140	TcX10_chr23:210433-210764	DCT	TM	OK	103493	389594	-1.40949	-1.82827	0.00035	0.000666532	yes
XLOC_002774	XLOC_002774	TcSYL_0094700	TcX10_chr13:437222-437973	DCT	TM	OK	227.19	151155	-0.587866	-1.82844	0.0002	0.000392633	yes
XLOC_004604	XLOC_004604	TcSYL_0109710	TcX10_chr16:364530-365584	DCT	TM	OK	167283	637251	-1.39235	-1.83054	0.001	0.00178322	yes
XLOC_003856	XLOC_003856	TcSYL_0105520	TcX10_chr15:252673-252947	DCT	TM	OK	354698	177.56	-0.998283	-1.83125	0.0003	0.000575222	yes
XLOC_010798	XLOC_010798	TcSYL_0157240	TcX10_chr32:390415-390749	DCT	TM	OK	395198	882297	-2.16324	-1.83357	0.0043	0.0068975	yes
XLOC_002237	XLOC_002237	TcSYL_0085230	TcX10_chr11:380739-380995	DCT	TM	OK	373071	176911	-1.07642	-1.83594	0.0005	0.000936402	yes
XLOC_007371	XLOC_007371	TcSYL_0131010	TcX10_chr23:511321-511610	DCT	TM	OK	616.08	362599	-0.764742	-1.83771	0.00015	0.000298501	yes
XLOC_008075	XLOC_008075	TcSYL_0138600	TcX10_chr25:158725-158993	DCT	TM	OK	352083	176555	-0.995792	-1.83827	0.00045	0.000846532	yes
XLOC_015529	XLOC_015529	TcSYL_0191800	TcX10_chr42:456965-457371	DCT	TM	OK	100673	45623	-1.14184	-1.83877	0.0006	0.00110941	yes
XLOC_012271	XLOC_012271	TcSYL_0174710	TcX10_chr37:448674-449290	DCT	TM	OK	222523	142973	-0.638207	-1.84069	0.00035	0.000666532	yes
XLOC_010905	XLOC_010905	TcSYL_0158940	TcX10_chr32:538997-539286	DCT	TM	OK	198.85	86364	-1.20318	-1.84149	0.00055	0.00102321	yes
XLOC_003746	XLOC_003746	TcSYL_0102770	TcX10_chr14:835188-835720	DCT	TM	OK	147153	856117	-0.781439	-1.8431	0.0003	0.000575222	yes
XLOC_016516	XLOC_016516	TcSYL_0200100	TcX10_chr44:20444-21792	DCT	TM	OK	804668	175291	-2.19864	-1.8432	0.00335	0.00549356	yes
XLOC_010670	XLOC_010670	TcSYL_0157750	TcX10_chr32:464666-466194	DCT	TM	OK	62129	149084	-2.05914	-1.84399	0.0018	0.00309108	yes
XLOC_008188	XLOC_008188	TcSYL_0140660	TcX10_chr26:488825-489090	DCT	TM	OK	587786	325.78	-0.851392	-1.84413	0.00035	0.000666532	yes
XLOC_006544	XLOC_006544	TcSYL_0122380	TcX10_chr21:395454-395806	DCT	TM	OK	387804	232463	-0.738326	-1.84618	0.0002	0.000392633	yes
XLOC_019890	XLOC_019890	TcSYL_0073760	TcX10_chr8:853922-854475	DCT	TM	OK	1847.51	1305.64	-0.500834	-1.84619	0.00015	0.000298501	yes
XLOC_002082	XLOC_002082	TcSYL_0088350	TcX10_chr11:895975-896201	DCT	TM	OK	746161	363611	-1.03709	-1.84832	0.00095	0.00170007	yes
XLOC_017115	XLOC_017115	TcSYL_0046020	TcX10_chr5:404006-404505	DCT	TM	OK	212192	129048	-0.717465	-1.84844	0.00015	0.000298501	yes
XLOC_008322	XLOC_008322	TcSYL_0140120	TcX10_chr26:376525-377027	DCT	TM	OK	297.32	188674	-0.656124	-1.85082	0.00025	0.000484755	yes
XLOC_009192	XLOC_009192	TcSYL_0025260	TcX10_chr3:912139-913211	DCT	TM	OK	194507	79185	-1.29653	-1.85189	0.0007	0.00128364	yes
XLOC_002095	XLOC_002095	TcSYL_0088540	TcX10_chr11:920134-920768	DCT	TM	OK	150782	916923	-0.717596	-1.85229	0.0002	0.000392633	yes
XLOC_000315	XLOC_000315	TcSYL_0005430	TcX10_chr1:1370604-1372327	DCT	TM	OK	185327	129141	-0.521127	-1.85509	0.0002	0.000392633	yes
XLOC_008334	XLOC_008334	TcSYL_0140250	TcX10_chr26:401391-401857	DCT	TM	OK	361877	231753	-0.642911	-1.85716	0.0001	0.000203386	yes
XLOC_011849	XLOC_011849	TcSYL_0169140	TcX10_chr36:143137-144155	DCT	TM	OK	274425	189023	-0.537849	-1.85766	0.00015	0.000298501	yes
XLOC_005991	XLOC_005991	TcSYL_0117690	TcX10_chr20:46253-47538	DCT	TM	OK	109761	720018	-0.608257	-1.85782	0.0003	0.000575222	yes
XLOC_011742	XLOC_011742	TcSYL_0167250	TcX10_chr35:347304-348259	DCT	TM	OK	269035	185599	-0.535601	-1.8595	0.00015	0.000298501	yes
XLOC_010575	XLOC_010575	TcSYL_0156490	TcX10_chr31:314151-314767	DCT	TM	OK	517815	235279	-1.13806	-1.86279	0.0006	0.00110941	yes
XLOC_018738	XLOC_018738	TcSYL_0062690	TcX10_chr7:239807-240294	DCT	TM	OK	185302	397683	-2.22019	-1.86364	0.0073	0.0113094	yes
XLOC_003271	XLOC_003271	TcSYL_0097590	TcX10_chr13:751733-752346	DCT	TM	OK	541352	372613	-0.538887	-1.8638	0.00025	0.000484755	yes
XLOC_007429	XLOC_007429	TcSYL_0131720	TcX10_chr23:562297-562535	DCT	TM	OK	494385	226362	-1.12701	-1.86549	0.00075	0.00136903	yes
XLOC_000249	XLOC_000249	TcSYL_0004610	TcX10_chr1:1219839-1220143	DCT	TM	OK	316462	169326	-0.902232	-1.86681	0.0004	0.000757937	yes
XLOC_010333	XLOC_010333	TcSYL_0152320	TcX10_chr30:316505-317196	DCT	TM	OK	113026	151943	-2.89505	-1.86728	0.00635	0.00992089	yes
XLOC_012004	XLOC_012004	TcSYL_0171130	TcX10_chr36:484405-485153	DCT	TM	OK	190722	122852	-0.634545	-1.86887	0.00035	0.000666532	yes
XLOC_013724	XLOC_013724	TcSYL_0036690	TcX10_chr4:483935-485145	DCT	TM	OK	605908	0.456368	-3.73083	-1.8709	0.02215	0.0317905	yes
XLOC_016689	XLOC_016689	TcSYL_0201920	TcX10_chr45:54624-55426	DCT	TM	OK	21938	812101	-1.4337	-1.87091	0.0009	0.00161633	yes
XLOC_005278	XLOC_005278	TcSYL_0015750	TcX10_chr2:371836-372314	DCT	TM	OK	601575	405849	-0.567803	-1.87103	0.00015	0.000298501	yes
XLOC_012592	XLOC_012592	TcSYL_0177250	TcX10_chr38:338571-338920	DCT	TM	OK	159606	769626	-1.05229	-1.87149	0.0003	0.000575222	yes
XLOC_002398	XLOC_002398	TcSYL_0089830	TcX10_chr12:302495-303066	DCT	TM	OK	119764	679511	-0.817625	-1.87893	0.00015	0.000298501	yes
XLOC_008394	XLOC_008394	TcSYL_0141720	TcX10_chr27:42608-43092	DCT	TM	OK	333325	211837	-0.653974	-1.88143	0.0002	0.000392633	yes
XLOC_008060	XLOC_008060	TcSYL_0138440	TcX10_chr25:88088-88620	DCT	TM	OK	120834	664138	-0.863469	-1.88467	0.0004	0.000757937	yes
XLOC_013145	XLOC_013145	TcSYL_0180210	TcX10_chr39:170434-170657	DCT	TM	OK	710897	324691	-1.13057	-1.88571	0.002	0.00341362	yes
XLOC_003974	XLOC_003974	TcSYL_0104240	TcX10_chr15:125119-125846	DCT	TM	OK	957276	551316	-0.796055	-1.88876	0.0001	0.000203386	yes
XLOC_019263	XLOC_019263	TcSYL_0060420	TcX10_chr7:45527-46050	DCT	TM	OK	18237	273026	-2.73976	-1.88901	0.0058	0.00910861	yes
XLOC_019390	XLOC_019390	TcSYL_0063570	TcX10_chr7:670268-671148	DCT	TM	OK	844832	163098	-2.37293	-1.89065	0.0046	0.00734447	yes
XLOC_016356	XLOC_016356	TcSYL_0198410	TcX10_chr43:313540-314000	DCT	TM	OK	39658	135123	-1.55334	-1.89066	0.0012	0.00211643	yes
XLOC_013690	XLOC_013690	TcSYL_0036180	TcX10_chr4:447872-448554	DCT	TM	OK	974028	11766	-3.04934	-1.89157	0.0143	0.0211083	yes
XLOC_003719	XLOC_003719	TcSYL_0102330	TcX10_chr14:806377-807026	DCT	TM	OK	323637	215123	-0.58922	-1.89251	0.00025	0.000484755	yes
XLOC_000796	XLOC_000796	TcSYL_0000730	TcX10_chr1:289142-290397	DCT	TM	OK	504758	352797	-0.516752	-1.89296	0.0003	0.000575222	yes
XLOC_010942	XLOC_010942	TcSYL_0159490	TcX10_chr32:681925-683237	DCT	TM	OK	153259	102567	-0.579402	-1.90182	0.0001	0.000203386	yes
XLOC_017354	XLOC_017354	TcSYL_0045270	TcX10_chr5:202867-203483	DCT	TM	OK	397342	265682	-0.58068	-1.90203	0.0001	0.000203386	yes
XLOC_006210	XLOC_006210	TcSYL_0121250	TcX10_chr20:564211-564962	DCT	TM	OK	170663	108197	-0.657492	-1.90386	5e-05	0.000105404	yes
XLOC_002325	XLOC_002325	TcSYL_0088370	TcX10_chr11:897044-897300	DCT	TM	OK	587143	310384	-0.919657	-1.90461	0.00025	0.000484755	yes
XLOC_010729	XLOC_010729	TcSYL_0159160	TcX10_chr32:553892-555486	DCT	TM	OK	301935	210569	-0.519949	-1.9088	5e-05	0.000105404	yes
XLOC_007759	XLOC_007759	TcSYL_0137930	TcX10_chr24:644969-645969	DCT	TM	OK	182.16	120384	-0.597564	-1.90913	0.0001	0.000203386	yes
XLOC_015389	XLOC_015389	TcSYL_0187890	TcX10_chr41:170492-171867	DCT	TM	OK	168485	113866	-0.565278	-1.91089	0.00015	0.000298501	yes
XLOC_002676	XLOC_002676	TcSYL_0092030	TcX10_chr12:906283-906884	DCT	TM	OK	520335	353856	-0.556278	-1.91283	0.00015	0.000298501	yes
XLOC_016237	XLOC_016237	TcSYL_0196480	TcX10_chr43:135051-136639	DCT	TM	OK	972526	637626	-0.609026	-1.9133	0.0003	0.000575222	yes
XLOC_018603	XLOC_018603	TcSYL_0059890	TcX10_chr6:1219895-1220313	DCT	TM	OK	214136	254411	-3.07329	-1.91524	0.01035	0.0156532	yes
XLOC_020120	XLOC_020120	TcSYL_0077260	TcX10_chr9:666515-667575	DCT	TM	OK	448963	312638	-0.522101	-1.91811	0.0002	0.000392633	yes
XLOC_013620	XLOC_013620	TcSYL_0035110	TcX10_chr4:368623-369377	DCT	TM	OK	878528	100931	-3.12172	-1.91951	0.0155	0.0227157	yes
XLOC_001429	XLOC_001429	TcSYL_0013670	TcX10_chr1:2761308-2761972	DCT	TM	OK	366649	244376	-0.585297	-1.92243	0.0001	0.000203386	yes
XLOC_017166	XLOC_017166	TcSYL_0046660	TcX10_chr5:576981-577411	DCT	TM	OK	332.17	203708	-0.705419	-1.92279	5e-05	0.000105404	yes
XLOC_003955	XLOC_003955	TcSYL_0103940	TcX10_chr15:75314-76218	DCT	TM	OK	962906	57634	-0.740474	-1.92602	0.00025	0.000484755	yes
XLOC_008848	XLOC_008848	TcSYL_0146180	TcX10_chr28:510952-511532	DCT	TM	OK	161095	946275	-0.767579	-1.92658	0.0003	0.000575222	yes
XLOC_013692	XLOC_013692	TcSYL_0036200	TcX10_chr4:451575-452092	DCT	TM	OK	126374	170267	-2.89183	-1.92913	0.0197	0.0284414	yes
XLOC_012421	XLOC_012421	TcSYL_0174320	TcX10_chr37:320658-321646	DCT	TM	OK	179699	117536	-0.612479	-1.9313	0.0001	0.000203386	yes
XLOC_010943	XLOC_010943	TcSYL_0159500	TcX10_chr32:686343-687817	DCT	TM	OK	447752	310.66	-0.527364	-1.93429	0.00015	0.000298501	yes
XLOC_013604	XLOC_013604	TcSYL_0034750	TcX10_chr4:346257-347233	DCT	TM	OK	761674	0.913979	-3.05894	-1.93488	0.0058	0.00910861	yes
XLOC_014023	XLOC_014023	TcSYL_0044100	TcX10_chr4:1409453-1409997	DCT	TM	OK	160736	921193	-0.803118	-1.9364	0.0001	0.000203386	yes
XLOC_018693	XLOC_018693	TcSYL_0062040	TcX10_chr7:171214-171737	DCT	TM	OK	391493	254667	-0.620374	-1.9374	5e-05	0.000105404	yes
XLOC_004270	XLOC_004270	TcSYL_0108160	TcX10_chr15:791748-792085	DCT	TM	OK	369598	209446	-0.819379	-1.9377	0.0003	0.000575222	yes
XLOC_001658	XLOC_001658	TcSYL_0083360	TcX10_chr10:1050234-1050562	DCT	TM	OK	547762	329546	-0.733068	-1.93819	0.0003	0.000575222	yes
XLOC_008407	XLOC_008407	TcSYL_0141850	TcX10_chr27:107382-107749	DCT	TM	OK	195206	109.69	-0.831567	-1.93892	0.00085	0.00153162	yes
XLOC_006543	XLOC_006543	TcSYL_0122360	TcX10_chr21:364516-364889	DCT	TM	OK	470987	287689	-0.711178	-1.94151	0.0002	0.000392633	yes
XLOC_002020	XLOC_002020	TcSYL_0087450	TcX10_chr11:792474-794035	DCT	TM	OK	119156	788167	-0.596284	-1.94267	0.0001	0.000203386	yes
XLOC_006457	XLOC_006457	TcSYL_0123720	TcX10_chr21:669089-669696	DCT	TM	OK	387395	144837	-1.41937	-1.94333	0.00075	0.00136903	yes
XLOC_020231	XLOC_020231	TcSYL_0078790	TcX10_chr9:821654-822075	DCT	TM	OK	263507	152797	-0.786227	-1.94355	0.00015	0.000298501	yes
XLOC_000038	XLOC_000038	TcSYL_0001080	TcX10_chr1:404034-404836	DCT	TM	OK	320262	214802	-0.576245	-1.94418	0.00015	0.000298501	yes
XLOC_003792	XLOC_003792	TcSYL_0103440	TcX10_chr14:874336-875264	DCT	TM	OK	289682	194706	-0.573174	-1.94436	5e-05	0.000105404	yes
XLOC_020526	XLOC_020526	TcSYL_0077230	TcX10_chr9:664351-664673	DCT	TM	OK	738004	454443	-0.699528	-1.94828	0.00015	0.000298501	yes
XLOC_010927	XLOC_010927	TcSYL_0159340	TcX10_chr32:576013-576308	DCT	TM	OK	288.01	140849	-1.03197	-1.94843	0.0001	0.000203386	yes
XLOC_000285	XLOC_000285	TcSYL_0005090	TcX10_chr1:1346787-1347187	DCT	TM	OK	362449	218105	-0.732759	-1.94919	0.0003	0.000575222	yes
XLOC_012578	XLOC_012578	TcSYL_0177070	TcX10_chr38:325995-327001	DCT	TM	OK	586568	325038	-0.851692	-1.95319	0.00035	0.000666532	yes
XLOC_000932	XLOC_000932	TcSYL_0003230	TcX10_chr1:905667-906043	DCT	TM	OK	405264	242018	-0.743747	-1.95388	0.00015	0.000298501	yes
XLOC_000349	XLOC_000349	TcSYL_0005920	TcX10_chr1:1402083-1402984	DCT	TM	OK	525033	271685	-0.950473	-1.95848	0.0001	0.000203386	yes
XLOC_001207	XLOC_001207	TcSYL_0008800	TcX10_chr1:1851298-1852115	DCT	TM	OK	104496	616692	-0.760833	-1.96175	0.00015	0.000298501	yes
XLOC_003755	XLOC_003755	TcSYL_0102880	TcX10_chr14:840655-841211	DCT	TM	OK	170816	990224	-0.786618	-1.9625	0.00015	0.000298501	yes
XLOC_014593	XLOC_014593	TcSYL_0041400	TcX10_chr4:1118794-1119194	DCT	TM	OK	31183	65587	-2.24928	-1.96859	0.0029	0.00481932	yes
XLOC_011941	XLOC_011941	TcSYL_0170420	TcX10_chr36:350912-352353	DCT	TM	OK	372623	256941	-0.536281	-1.96921	0.0001	0.000203386	yes
XLOC_008179	XLOC_008179	TcSYL_0140530	TcX10_chr26:458882-459450	DCT	TM	OK	7701.76	4974.24	-0.630711	-1.97021	0.00015	0.000298501	yes
XLOC_018109	XLOC_018109	TcSYL_0051830	TcX10_chr6:467811-468874	DCT	TM	OK	6502.26	142385	-5.51307	-1.97045	5e-05	0.000105404	yes
XLOC_016723	XLOC_016723	TcSYL_0202520	TcX10_chr45:244211-245772	DCT	TM	OK	921663	591784	-0.639169	-1.97125	5e-05	0.000105404	yes
XLOC_006512	XLOC_006512	TcSYL_0121990	TcX10_chr21:276911-277212	DCT	TM	OK	538731	306951	-0.811557	-1.97332	0.00015	0.000298501	yes
XLOC_002764	XLOC_002764	TcSYL_0094600	TcX10_chr13:420863-421482	DCT	TM	OK	313732	203.02	-0.627912	-1.97402	0.00015	0.000298501	yes
XLOC_001862	XLOC_001862	TcSYL_0085300	TcX10_chr11:384300-384718	DCT	TM	OK	217759	120476	-0.853982	-1.97971	0.00015	0.000298501	yes
XLOC_017312	XLOC_017312	TcSYL_0049890	TcX10_chr5:1322827-1327751	DCT	TM	OK	778384	399982	-0.960547	-1.98117	0.00025	0.000484755	yes
XLOC_010887	XLOC_010887	TcSYL_0158710	TcX10_chr32:521604-522097	DCT	TM	OK	197965	113.29	-0.805222	-1.98361	5e-05	0.000105404	yes
XLOC_006090	XLOC_006090	TcSYL_0119170	TcX10_chr20:422110-422405	DCT	TM	OK	221541	92356	-1.26229	-1.98616	0.0001	0.000203386	yes
XLOC_004079	XLOC_004079	TcSYL_0105660	TcX10_chr15:259827-260119	DCT	TM	OK	257831	114233	-1.17445	-1.98812	0.0001	0.000203386	yes
XLOC_002671	XLOC_002671	TcSYL_0091980	TcX10_chr12:889696-889922	DCT	TM	OK	638955	274958	-1.2165	-1.9933	0.00015	0.000298501	yes
XLOC_018044	XLOC_018044	TcSYL_0050000	TcX10_chr6:23378-23862	DCT	TM	OK	491752	315481	-0.64038	-1.99582	0.0001	0.000203386	yes
XLOC_012268	XLOC_012268	TcSYL_0174680	TcX10_chr37:437787-438712	DCT	TM	OK	992237	586555	-0.758418	-2.0038	0.0001	0.000203386	yes
XLOC_016616	XLOC_016616	TcSYL_0201750	TcX10_chr44:403082-405672	DCT	TM	OK	175142	919547	-0.929531	-2.00408	0.0003	0.000575222	yes
XLOC_010618	XLOC_010618	TcSYL_0156980	TcX10_chr31:451407-452203	DCT	TM	OK	153011	940475	-0.702177	-2.00622	0.0001	0.000203386	yes
XLOC_001263	XLOC_001263	TcSYL_0010230	TcX10_chr1:1990744-1990964	DCT	TM	OK	486167	270298	-0.8469	-2.00731	0.03435	0.0474901	yes
XLOC_014765	XLOC_014765	TcSYL_0043800	TcX10_chr4:1342589-1342833	DCT	TM	OK	910406	493291	-0.884071	-2.00734	0.0001	0.000203386	yes
XLOC_014641	XLOC_014641	TcSYL_0042190	TcX10_chr4:1205326-1205726	DCT	TM	OK	308732	315338	-3.29138	-2.00882	0.0099	0.0150087	yes
XLOC_002233	XLOC_002233	TcSYL_0085190	TcX10_chr11:379389-379618	DCT	TM	OK	711832	323166	-1.13926	-2.0089	0.0005	0.000936402	yes
XLOC_004642	XLOC_004642	TcSYL_0110680	TcX10_chr16:735192-736246	DCT	TM	OK	256525	170052	-0.593123	-2.01142	5e-05	0.000105404	yes
XLOC_004453	XLOC_004453	TcSYL_0111640	TcX10_chr16:1142766-1145278	DCT	TM	OK	1189.86	763421	-0.640238	-2.01337	5e-05	0.000105404	yes
XLOC_004082	XLOC_004082	TcSYL_0105730	TcX10_chr15:264238-265334	DCT	TM	OK	108165	66557	-0.700574	-2.01594	5e-05	0.000105404	yes
XLOC_004905	XLOC_004905	TcSYL_0113440	TcX10_chr18:387825-389149	DCT	TM	OK	273366	184.85	-0.564481	-2.01677	5e-05	0.000105404	yes
XLOC_015659	XLOC_015659	TcSYL_0194250	TcX10_chr42:682925-683229	DCT	TM	OK	110582	31929	-1.79218	-2.01761	0.0003	0.000575222	yes
XLOC_014957	XLOC_014957	TcSYL_0186530	TcX10_chr40:413985-414568	DCT	TM	OK	649704	289848	-1.16448	-2.01806	0.00015	0.000298501	yes
XLOC_016504	XLOC_016504	TcSYL_0201290	TcX10_chr44:230929-232181	DCT	TM	OK	113516	713771	-0.669362	-2.01893	5e-05	0.000105404	yes
XLOC_020236	XLOC_020236	TcSYL_0078840	TcX10_chr9:858325-859568	DCT	TM	OK	496439	339461	-0.548373	-2.01931	5e-05	0.000105404	yes
XLOC_002524	XLOC_002524	TcSYL_0091780	TcX10_chr12:577987-579113	DCT	TM	OK	305443	205012	-0.575194	-2.02048	5e-05	0.000105404	yes
XLOC_000346	XLOC_000346	TcSYL_0005890	TcX10_chr1:1400001-1400377	DCT	TM	OK	211335	110.51	-0.935347	-2.02111	5e-05	0.000105404	yes
XLOC_008056	XLOC_008056	TcSYL_0138400	TcX10_chr25:75697-76265	DCT	TM	OK	483338	317709	-0.605328	-2.02126	5e-05	0.000105404	yes
XLOC_007223	XLOC_007223	TcSYL_0132910	TcX10_chr23:672137-672687	DCT	TM	OK	286627	176895	-0.696282	-2.02135	5e-05	0.000105404	yes
XLOC_015545	XLOC_015545	TcSYL_0192080	TcX10_chr42:479122-479453	DCT	TM	OK	145763	565652	-1.36564	-2.02265	0.00015	0.000298501	yes
XLOC_005286	XLOC_005286	TcSYL_0015880	TcX10_chr2:379249-380912	DCT	TM	OK	325503	175193	-0.893726	-2.02343	5e-05	0.000105404	yes
XLOC_010580	XLOC_010580	TcSYL_0156540	TcX10_chr31:339317-339870	DCT	TM	OK	157.08	881079	-0.834159	-2.02377	5e-05	0.000105404	yes
XLOC_019870	XLOC_019870	TcSYL_0073560	TcX10_chr8:797551-798182	DCT	TM	OK	175641	104219	-0.753012	-2.02649	0.00015	0.000298501	yes
XLOC_015416	XLOC_015416	TcSYL_0188940	TcX10_chr41:292019-292314	DCT	TM	OK	234924	101.81	-1.20631	-2.03145	5e-05	0.000105404	yes
XLOC_001948	XLOC_001948	TcSYL_0086470	TcX10_chr11:563162-564189	DCT	TM	OK	238324	157296	-0.599438	-2.03396	5e-05	0.000105404	yes
XLOC_001941	XLOC_001941	TcSYL_0086400	TcX10_chr11:538748-539520	DCT	TM	OK	185.97	115192	-0.691026	-2.03811	5e-05	0.000105404	yes
XLOC_016588	XLOC_016588	TcSYL_0201410	TcX10_chr44:263985-267214	DCT	TM	OK	808415	534401	-0.597172	-2.03811	5e-05	0.000105404	yes
XLOC_012966	XLOC_012966	TcSYL_0182180	TcX10_chr39:350810-351213	DCT	TM	OK	316166	181.04	-0.80437	-2.0407	5e-05	0.000105404	yes
XLOC_020459	XLOC_020459	TcSYL_0075800	TcX10_chr9:545216-546444	DCT	TM	OK	673684	0.997528	-2.75564	-2.04457	0.0045	0.00719088	yes
XLOC_019813	XLOC_019813	TcSYL_0072520	TcX10_chr8:185520-186478	DCT	TM	OK	137771	84624	-0.703129	-2.04541	0.0001	0.000203386	yes
XLOC_017506	XLOC_017506	TcSYL_0048570	TcX10_chr5:1120373-1120779	DCT	TM	OK	195412	100792	-0.955136	-2.04608	5e-05	0.000105404	yes
XLOC_012068	XLOC_012068	TcSYL_0170850	TcX10_chr36:434697-435043	DCT	TM	OK	189026	862391	-1.13217	-2.05266	0.0001	0.000203386	yes
XLOC_016617	XLOC_016617	TcSYL_0201760	TcX10_chr44:411629-412917	DCT	TM	OK	202668	134173	-0.595021	-2.0533	0.0001	0.000203386	yes
XLOC_008161	XLOC_008161	TcSYL_0139430	TcX10_chr26:136604-137103	DCT	TM	OK	190208	105759	-0.846797	-2.05528	0.0002	0.000392633	yes
XLOC_001865	XLOC_001865	TcSYL_0085330	TcX10_chr11:385874-386490	DCT	TM	OK	278428	173265	-0.684327	-2.05593	5e-05	0.000105404	yes
XLOC_001479	XLOC_001479	TcSYL_0080680	TcX10_chr10:299682-300673	DCT	TM	OK	453523	305531	-0.569858	-2.05648	5e-05	0.000105404	yes
XLOC_006250	XLOC_006250	TcSYL_0118550	TcX10_chr20:346703-347892	DCT	TM	OK	899818	542377	-0.730336	-2.05754	5e-05	0.000105404	yes
XLOC_005190	XLOC_005190	TcSYL_0117490	TcX10_chr19:764274-764875	DCT	TM	OK	873958	427364	-1.0321	-2.05898	5e-05	0.000105404	yes
XLOC_009236	XLOC_009236	TcSYL_0025860	TcX10_chr3:995100-995458	DCT	TM	OK	331018	181582	-0.866291	-2.05944	5e-05	0.000105404	yes
XLOC_016627	XLOC_016627	TcSYL_0201970	TcX10_chr45:91454-91869	DCT	TM	OK	536361	334058	-0.683108	-2.06023	5e-05	0.000105404	yes
XLOC_004934	XLOC_004934	TcSYL_0114960	TcX10_chr18:738667-739421	DCT	TM	OK	181462	111.13	-0.707426	-2.06041	5e-05	0.000105404	yes
XLOC_004493	XLOC_004493	TcSYL_0112050	TcX10_chr16:1289580-1289875	DCT	TM	OK	407166	208616	-0.964767	-2.06073	5e-05	0.000105404	yes
XLOC_001016	XLOC_001016	TcSYL_0006250	TcX10_chr1:1509100-1510238	DCT	TM	OK	528453	358399	-0.560208	-2.06357	5e-05	0.000105404	yes
XLOC_001013	XLOC_001013	TcSYL_0006220	TcX10_chr1:1489560-1490131	DCT	TM	OK	279813	171473	-0.706485	-2.06652	5e-05	0.000105404	yes
XLOC_011424	XLOC_011424	TcSYL_0165460	TcX10_chr34:445449-445756	DCT	TM	OK	843362	514565	-0.712798	-2.06769	0.0001	0.000203386	yes
XLOC_020251	XLOC_020251	TcSYL_0079000	TcX10_chr9:942498-942760	DCT	TM	OK	1215.01	717645	-0.759628	-2.06977	0.0001	0.000203386	yes
XLOC_008602	XLOC_008602	TcSYL_0145200	TcX10_chr28:289943-290673	DCT	TM	OK	287.73	184.66	-0.639843	-2.07129	5e-05	0.000105404	yes
XLOC_020405	XLOC_020405	TcSYL_0075260	TcX10_chr9:351994-352448	DCT	TM	OK	312544	159242	-4.29477	-2.07281	0.0272	0.0384048	yes
XLOC_020417	XLOC_020417	TcSYL_0075380	TcX10_chr9:423127-423500	DCT	TM	OK	1842.01	1233.6	-0.578405	-2.07504	5e-05	0.000105404	yes
XLOC_014088	XLOC_014088	TcSYL_0044840	TcX10_chr4:1532859-1533208	DCT	TM	OK	432427	248568	-0.798817	-2.07914	5e-05	0.000105404	yes
XLOC_006525	XLOC_006525	TcSYL_0122180	TcX10_chr21:293523-293818	DCT	TM	OK	485921	260198	-0.901112	-2.08316	0.00015	0.000298501	yes
XLOC_000281	XLOC_000281	TcSYL_0005010	TcX10_chr1:1341651-1342186	DCT	TM	OK	207311	118958	-0.80134	-2.08571	5e-05	0.000105404	yes
XLOC_001726	XLOC_001726	TcSYL_0082430	TcX10_chr10:711520-711974	DCT	TM	OK	512642	321605	-0.67266	-2.08603	5e-05	0.000105404	yes
XLOC_012187	XLOC_012187	TcSYL_0172880	TcX10_chr37:189845-190182	DCT	TM	OK	340798	182687	-0.899544	-2.08862	5e-05	0.000105404	yes
XLOC_019376	XLOC_019376	TcSYL_0063430	TcX10_chr7:576972-578020	DCT	TM	OK	175901	111484	-0.657932	-2.09239	5e-05	0.000105404	yes
XLOC_004322	XLOC_004322	TcSYL_0108840	TcX10_chr15:906864-907087	DCT	TM	OK	732584	311893	-1.23194	-2.09303	5e-05	0.000105404	yes
XLOC_003543	XLOC_003543	TcSYL_0103110	TcX10_chr14:855042-855382	DCT	TM	OK	598.27	352862	-0.761694	-2.0931	0.0001	0.000203386	yes
XLOC_008190	XLOC_008190	TcSYL_0140680	TcX10_chr26:493280-493827	DCT	TM	OK	590411	384.2	-0.619862	-2.09336	5e-05	0.000105404	yes
XLOC_000097	XLOC_000097	TcSYL_0001950	TcX10_chr1:780535-780764	DCT	TM	OK	334414	163028	-1.03652	-2.09453	0.0149	0.0219298	yes
XLOC_015385	XLOC_015385	TcSYL_0187850	TcX10_chr41:157811-158169	DCT	TM	OK	275322	141721	-0.958063	-2.09471	5e-05	0.000105404	yes
XLOC_015997	XLOC_015997	TcSYL_0196150	TcX10_chr43:106469-108570	DCT	TM	OK	76.57	484099	-0.661478	-2.09496	5e-05	0.000105404	yes
XLOC_005248	XLOC_005248	TcSYL_0015300	TcX10_chr2:326804-328323	DCT	TM	OK	267992	180053	-0.573766	-2.09696	0.0001	0.000203386	yes
XLOC_007749	XLOC_007749	TcSYL_0137830	TcX10_chr24:619358-620886	DCT	TM	OK	306097	154955	-0.982138	-2.10055	5e-05	0.000105404	yes
XLOC_004430	XLOC_004430	TcSYL_0111300	TcX10_chr16:1068397-1069223	DCT	TM	OK	254444	162286	-0.648812	-2.10122	5e-05	0.000105404	yes
XLOC_020107	XLOC_020107	TcSYL_0077080	TcX10_chr9:655747-656003	DCT	TM	OK	154.76	562372	-1.46044	-2.10281	0.00345	0.00564532	yes
XLOC_008312	XLOC_008312	TcSYL_0140020	TcX10_chr26:347208-348235	DCT	TM	OK	139551	858583	-0.70076	-2.10359	5e-05	0.000105404	yes
XLOC_000260	XLOC_000260	TcSYL_0004730	TcX10_chr1:1257502-1258208	DCT	TM	OK	676577	452202	-0.581286	-2.10464	0.0001	0.000203386	yes
XLOC_013954	XLOC_013954	TcSYL_0041510	TcX10_chr4:1150696-1151609	DCT	TM	OK	148149	363965	-2.02518	-2.10533	0.0007	0.00128364	yes
XLOC_011256	XLOC_011256	TcSYL_0162780	TcX10_chr33:301042-301511	DCT	TM	OK	198591	108425	-0.873101	-2.10579	5e-05	0.000105404	yes
XLOC_000839	XLOC_000839	TcSYL_0001470	TcX10_chr1:577541-577932	DCT	TM	OK	448156	265337	-0.756174	-2.10776	5e-05	0.000105404	yes
XLOC_015247	XLOC_015247	TcSYL_0189040	TcX10_chr41:299581-299996	DCT	TM	OK	289578	162.77	-0.831121	-2.10818	5e-05	0.000105404	yes
XLOC_011961	XLOC_011961	TcSYL_0170620	TcX10_chr36:413246-413910	DCT	TM	OK	694042	463843	-0.581388	-2.10821	5e-05	0.000105404	yes
XLOC_010754	XLOC_010754	TcSYL_0159730	TcX10_chr32:826296-826834	DCT	TM	OK	119879	606845	-0.982176	-2.10848	0.0001	0.000203386	yes
XLOC_011717	XLOC_011717	TcSYL_0167000	TcX10_chr35:273814-275063	DCT	TM	OK	217451	142464	-0.610095	-2.10988	5e-05	0.000105404	yes
XLOC_015251	XLOC_015251	TcSYL_0189090	TcX10_chr41:304895-306231	DCT	TM	OK	250228	165.68	-0.594843	-2.11059	0.0001	0.000203386	yes
XLOC_009275	XLOC_009275	TcSYL_0026390	TcX10_chr3:1031083-1031828	DCT	TM	OK	929732	625593	-0.571591	-2.11115	5e-05	0.000105404	yes
XLOC_020449	XLOC_020449	TcSYL_0075700	TcX10_chr9:520269-521485	DCT	TM	OK	565213	0.616311	-3.19706	-2.11163	0.008	0.0122957	yes
XLOC_001809	XLOC_001809	TcSYL_0084490	TcX10_chr11:309964-310703	DCT	TM	OK	238236	148173	-0.685106	-2.11212	5e-05	0.000105404	yes
XLOC_012652	XLOC_012652	TcSYL_0178140	TcX10_chr38:453780-454171	DCT	TM	OK	363039	204521	-0.827879	-2.11394	5e-05	0.000105404	yes
XLOC_008086	XLOC_008086	TcSYL_0138710	TcX10_chr25:198044-199215	DCT	TM	OK	259.61	170648	-0.605322	-2.11574	5e-05	0.000105404	yes
XLOC_002767	XLOC_002767	TcSYL_0094630	TcX10_chr13:425290-425510	DCT	TM	OK	875348	400453	-1.12822	-2.12158	0.0005	0.000936402	yes
XLOC_020095	XLOC_020095	TcSYL_0076910	TcX10_chr9:633091-633707	DCT	TM	OK	451198	290332	-0.636058	-2.12198	5e-05	0.000105404	yes
XLOC_007396	XLOC_007396	TcSYL_0131360	TcX10_chr23:532324-533069	DCT	TM	OK	279155	175878	-0.666492	-2.12211	5e-05	0.000105404	yes
XLOC_003292	XLOC_003292	TcSYL_0097870	TcX10_chr13:768843-769195	DCT	TM	OK	503877	294.49	-0.77485	-2.1223	5e-05	0.000105404	yes
XLOC_013113	XLOC_013113	TcSYL_0179620	TcX10_chr39:118741-120560	DCT	TM	OK	117226	754559	-0.63559	-2.12306	5e-05	0.000105404	yes
XLOC_018049	XLOC_018049	TcSYL_0050050	TcX10_chr6:44518-44897	DCT	TM	OK	587172	355187	-0.725205	-2.12349	0.0001	0.000203386	yes
XLOC_005081	XLOC_005081	TcSYL_0116100	TcX10_chr19:574796-575259	DCT	TM	OK	184797	977608	-0.918618	-2.12519	5e-05	0.000105404	yes
XLOC_013499	XLOC_013499	TcSYL_0032900	TcX10_chr4:229587-230932	DCT	TM	OK	610164	0.608814	-3.32512	-2.12554	0.0094	0.0142993	yes
XLOC_013226	XLOC_013226	TcSYL_0182510	TcX10_chr39:369652-369953	DCT	TM	OK	341327	167734	-1.02497	-2.12645	5e-05	0.000105404	yes
XLOC_000735	XLOC_000735	TcSYL_0014400	TcX10_chr1:3050791-3051617	DCT	TM	OK	126034	72865	-0.790521	-2.12824	5e-05	0.000105404	yes
XLOC_020568	XLOC_020568	TcSYL_0078580	TcX10_chr9:765806-766038	DCT	TM	OK	1550.86	880572	-0.816555	-2.13052	0.0003	0.000575222	yes
XLOC_013509	XLOC_013509	TcSYL_0033090	TcX10_chr4:240615-241714	DCT	TM	OK	832929	131357	-2.6647	-2.13266	0.00415	0.00668381	yes
XLOC_017194	XLOC_017194	TcSYL_0046940	TcX10_chr5:662840-663351	DCT	TM	OK	270136	158122	-0.772651	-2.13325	5e-05	0.000105404	yes
XLOC_008057	XLOC_008057	TcSYL_0138410	TcX10_chr25:78027-78526	DCT	TM	OK	337943	203134	-0.734347	-2.1333	0.00015	0.000298501	yes
XLOC_002553	XLOC_002553	TcSYL_0092360	TcX10_chr12:997507-997934	DCT	TM	OK	167741	840891	-0.996246	-2.13412	5e-05	0.000105404	yes
XLOC_018435	XLOC_018435	TcSYL_0056870	TcX10_chr6:862303-863249	DCT	TM	OK	100924	577736	-0.804786	-2.13457	0.0001	0.000203386	yes
XLOC_017406	XLOC_017406	TcSYL_0047470	TcX10_chr5:881048-881376	DCT	TM	OK	765321	459768	-0.735158	-2.13507	5e-05	0.000105404	yes
XLOC_014495	XLOC_014495	TcSYL_0039930	TcX10_chr4:929081-929472	DCT	TM	OK	720449	220274	-1.7096	-2.13736	0.0002	0.000392633	yes
XLOC_011537	XLOC_011537	TcSYL_0164760	TcX10_chr34:395812-396068	DCT	TM	OK	869794	455998	-0.931644	-2.13934	5e-05	0.000105404	yes
XLOC_018845	XLOC_018845	TcSYL_0064410	TcX10_chr7:1046529-1046827	DCT	TM	OK	1057.62	645388	-0.712582	-2.14102	5e-05	0.000105404	yes
XLOC_014662	XLOC_014662	TcSYL_0042470	TcX10_chr4:1224472-1226807	DCT	TM	OK	321472	214769	-0.581906	-2.14104	5e-05	0.000105404	yes
XLOC_000196	XLOC_000196	TcSYL_0004080	TcX10_chr1:1093198-1093454	DCT	TM	OK	441051	195605	-1.173	-2.14129	5e-05	0.000105404	yes
XLOC_002396	XLOC_002396	TcSYL_0089810	TcX10_chr12:301209-301561	DCT	TM	OK	912792	573355	-0.670857	-2.14594	0.0001	0.000203386	yes
XLOC_002198	XLOC_002198	TcSYL_0084210	TcX10_chr11:234269-234633	DCT	TM	OK	465308	267218	-0.800167	-2.14669	5e-05	0.000105404	yes
XLOC_015765	XLOC_015765	TcSYL_0191680	TcX10_chr42:423481-423737	DCT	TM	OK	356367	141437	-1.3332	-2.15069	5e-05	0.000105404	yes
XLOC_020436	XLOC_020436	TcSYL_0075570	TcX10_chr9:483521-483840	DCT	TM	OK	873.27	524791	-0.734683	-2.151	5e-05	0.000105404	yes
XLOC_014576	XLOC_014576	TcSYL_0041190	TcX10_chr4:1058184-1058485	DCT	TM	OK	47032	641526	-2.87406	-2.15106	0.008	0.0122957	yes
XLOC_014584	XLOC_014584	TcSYL_0041270	TcX10_chr4:1079006-1079364	DCT	TM	OK	849657	527866	-0.686708	-2.15535	5e-05	0.000105404	yes
XLOC_000078	XLOC_000078	TcSYL_0001740	TcX10_chr1:740309-741162	DCT	TM	OK	118765	680434	-0.803579	-2.15586	5e-05	0.000105404	yes
XLOC_016558	XLOC_016558	TcSYL_0200750	TcX10_chr44:111287-112881	DCT	TM	OK	160388	103766	-0.628224	-2.15656	5e-05	0.000105404	yes
XLOC_015165	XLOC_015165	TcSYL_0187940	TcX10_chr41:195375-195778	DCT	TM	OK	291444	159554	-0.869176	-2.15863	0.0001	0.000203386	yes
XLOC_017642	XLOC_017642	TcSYL_0050800	TcX10_chr6:226377-226705	DCT	TM	OK	316613	157926	-1.00347	-2.16175	5e-05	0.000105404	yes
XLOC_018107	XLOC_018107	TcSYL_0051810	TcX10_chr6:459291-460462	DCT	TM	OK	771273	434815	-0.826841	-2.16231	5e-05	0.000105404	yes
XLOC_012161	XLOC_012161	TcSYL_0172550	TcX10_chr37:167539-167975	DCT	TM	OK	436307	261906	-0.736293	-2.16457	5e-05	0.000105404	yes
XLOC_005356	XLOC_005356	TcSYL_0017070	TcX10_chr2:457699-457943	DCT	TM	OK	483299	200182	-1.2716	-2.1673	0.00015	0.000298501	yes
XLOC_002240	XLOC_002240	TcSYL_0085350	TcX10_chr11:387343-387983	DCT	TM	OK	252353	152064	-0.730762	-2.16957	5e-05	0.000105404	yes
XLOC_020351	XLOC_020351	TcSYL_0074710	TcX10_chr9:138276-138724	DCT	TM	OK	496.78	304439	-0.706453	-2.16965	5e-05	0.000105404	yes
XLOC_000204	XLOC_000204	TcSYL_0004160	TcX10_chr1:1110183-1110433	DCT	TM	OK	3407.66	2181.77	-0.643283	-2.17239	5e-05	0.000105404	yes
XLOC_004940	XLOC_004940	TcSYL_0115160	TcX10_chr19:257860-258104	DCT	TM	OK	301465	142637	-1.07964	-2.17337	0.0059	0.00925222	yes
XLOC_013691	XLOC_013691	TcSYL_0036190	TcX10_chr4:449535-450535	DCT	TM	OK	90589	12251	-2.88644	-2.1736	0.005	0.00792959	yes
XLOC_017345	XLOC_017345	TcSYL_0045180	TcX10_chr5:164848-165377	DCT	TM	OK	442306	275014	-0.685538	-2.17466	5e-05	0.000105404	yes
XLOC_013701	XLOC_013701	TcSYL_0036390	TcX10_chr4:461666-462726	DCT	TM	OK	878211	14575	-2.59107	-2.17551	0.00235	0.00397515	yes
XLOC_019885	XLOC_019885	TcSYL_0073710	TcX10_chr8:838350-839374	DCT	TM	OK	274398	176334	-0.637964	-2.17852	5e-05	0.000105404	yes
XLOC_005095	XLOC_005095	TcSYL_0116240	TcX10_chr19:626162-626598	DCT	TM	OK	318231	180485	-0.818197	-2.17907	5e-05	0.000105404	yes
XLOC_011711	XLOC_011711	TcSYL_0166940	TcX10_chr35:250791-251128	DCT	TM	OK	418528	225541	-0.891937	-2.17985	5e-05	0.000105404	yes
XLOC_000309	XLOC_000309	TcSYL_0005370	TcX10_chr1:1366974-1367329	DCT	TM	OK	8458.22	5546.85	-0.608685	-2.1805	5e-05	0.000105404	yes
XLOC_018452	XLOC_018452	TcSYL_0057170	TcX10_chr6:964417-965123	DCT	TM	OK	133881	751031	-0.834012	-2.18058	5e-05	0.000105404	yes
XLOC_000569	XLOC_000569	TcSYL_0011570	TcX10_chr1:2342368-2342981	DCT	TM	OK	263.07	157882	-0.736604	-2.1819	5e-05	0.000105404	yes
XLOC_011856	XLOC_011856	TcSYL_0169210	TcX10_chr36:152012-152394	DCT	TM	OK	213205	104353	-1.03076	-2.18237	5e-05	0.000105404	yes
XLOC_011743	XLOC_011743	TcSYL_0167260	TcX10_chr35:349336-350201	DCT	TM	OK	206538	127.63	-0.694444	-2.18391	5e-05	0.000105404	yes
XLOC_012794	XLOC_012794	TcSYL_0178950	TcX10_chr39:38247-38494	DCT	TM	OK	605356	269413	-1.16797	-2.18421	5e-05	0.000105404	yes
XLOC_014619	XLOC_014619	TcSYL_0041850	TcX10_chr4:1179297-1179697	DCT	TM	OK	365842	63929	-2.51668	-2.18757	0.0016	0.00276773	yes
XLOC_011273	XLOC_011273	TcSYL_0163090	TcX10_chr33:318538-319019	DCT	TM	OK	264217	148166	-0.834506	-2.18929	5e-05	0.000105404	yes
XLOC_018491	XLOC_018491	TcSYL_0057610	TcX10_chr6:1073936-1075413	DCT	TM	OK	565648	315045	-0.844347	-2.19319	5e-05	0.000105404	yes
XLOC_012729	XLOC_012729	TcSYL_0176940	TcX10_chr38:319673-319917	DCT	TM	OK	744939	111825	-2.73588	-2.19341	0.00925	0.0140853	yes
XLOC_004800	XLOC_004800	TcSYL_0114250	TcX10_chr18:535631-536103	DCT	TM	OK	525895	325754	-0.690994	-2.19383	5e-05	0.000105404	yes
XLOC_008500	XLOC_008500	TcSYL_0142590	TcX10_chr27:250324-250823	DCT	TM	OK	381689	230314	-0.728794	-2.19684	5e-05	0.000105404	yes
XLOC_005324	XLOC_005324	TcSYL_0016510	TcX10_chr2:419146-419546	DCT	TM	OK	730615	245565	-1.57301	-2.19793	0.0003	0.000575222	yes
XLOC_000686	XLOC_000686	TcSYL_0013500	TcX10_chr1:2687719-2688305	DCT	TM	OK	102.36	498953	-1.03668	-2.20107	5e-05	0.000105404	yes
XLOC_004763	XLOC_004763	TcSYL_0113830	TcX10_chr18:471117-471457	DCT	TM	OK	383941	203191	-0.918046	-2.20202	5e-05	0.000105404	yes
XLOC_008822	XLOC_008822	TcSYL_0145460	TcX10_chr28:332169-332545	DCT	TM	OK	168779	748656	-1.17276	-2.20294	5e-05	0.000105404	yes
XLOC_012402	XLOC_012402	TcSYL_0174070	TcX10_chr37:303562-303974	DCT	TM	OK	331.37	182989	-0.856689	-2.20334	0.0002	0.000392633	yes
XLOC_004589	XLOC_004589	TcSYL_0109400	TcX10_chr16:212924-213807	DCT	TM	OK	190951	116124	-0.717534	-2.20425	5e-05	0.000105404	yes
XLOC_004020	XLOC_004020	TcSYL_0104800	TcX10_chr15:205453-205691	DCT	TM	OK	815959	391943	-1.05785	-2.20437	0.00015	0.000298501	yes
XLOC_000931	XLOC_000931	TcSYL_0003220	TcX10_chr1:904532-904857	DCT	TM	OK	498747	272052	-0.874423	-2.20602	5e-05	0.000105404	yes
XLOC_001851	XLOC_001851	TcSYL_0085110	TcX10_chr11:373061-373608	DCT	TM	OK	129317	647943	-0.996971	-2.20668	5e-05	0.000105404	yes
XLOC_002320	XLOC_002320	TcSYL_0088190	TcX10_chr11:885729-885952	DCT	TM	OK	467009	143799	-1.6994	-2.207	5e-05	0.000105404	yes
XLOC_010791	XLOC_010791	TcSYL_0160110	TcX10_chr32:969698-970344	DCT	TM	OK	291901	725571	-2.00829	-2.20769	0.00035	0.000666532	yes
XLOC_004571	XLOC_004571	TcSYL_0109220	TcX10_chr16:139061-139773	DCT	TM	OK	1222.02	803388	-0.6051	-2.21073	5e-05	0.000105404	yes
XLOC_012733	XLOC_012733	TcSYL_0177030	TcX10_chr38:323961-324415	DCT	TM	OK	484809	126289	-1.94069	-2.21101	0.0003	0.000575222	yes
XLOC_013205	XLOC_013205	TcSYL_0181880	TcX10_chr39:331007-331242	DCT	TM	OK	237538	927817	-1.35624	-2.21123	0.00565	0.0088878	yes
XLOC_008959	XLOC_008959	TcSYL_0146680	TcX10_chr29:78636-79204	DCT	TM	OK	321254	193823	-0.728973	-2.21147	5e-05	0.000105404	yes
XLOC_001661	XLOC_001661	TcSYL_0083390	TcX10_chr10:1057153-1057715	DCT	TM	OK	182053	99461	-0.872154	-2.21997	5e-05	0.000105404	yes
XLOC_004903	XLOC_004903	TcSYL_0113420	TcX10_chr18:382291-382997	DCT	TM	OK	119568	642431	-0.896212	-2.2212	5e-05	0.000105404	yes
XLOC_008128	XLOC_008128	TcSYL_0139100	TcX10_chr26:18752-20124	DCT	TM	OK	172263	109193	-0.657733	-2.22163	5e-05	0.000105404	yes
XLOC_007507	XLOC_007507	TcSYL_0132810	TcX10_chr23:631312-632024	DCT	TM	OK	192683	112786	-0.77264	-2.22256	5e-05	0.000105404	yes
XLOC_008305	XLOC_008305	TcSYL_0139910	TcX10_chr26:335917-337151	DCT	TM	OK	149158	921409	-0.694925	-2.22332	5e-05	0.000105404	yes
XLOC_018050	XLOC_018050	TcSYL_0050060	TcX10_chr6:53504-54066	DCT	TM	OK	225463	128641	-0.80954	-2.22384	5e-05	0.000105404	yes
XLOC_014627	XLOC_014627	TcSYL_0041990	TcX10_chr4:1190441-1190841	DCT	TM	OK	333467	465701	-2.84007	-2.22442	0.0022	0.00373645	yes
XLOC_015042	XLOC_015042	TcSYL_0185000	TcX10_chr40:277406-278634	DCT	TM	OK	744729	105478	-2.81978	-2.23107	0.0028	0.00466235	yes
XLOC_013122	XLOC_013122	TcSYL_0179710	TcX10_chr39:127656-128089	DCT	TM	OK	221569	115322	-0.942087	-2.2325	5e-05	0.000105404	yes
XLOC_005245	XLOC_005245	TcSYL_0015270	TcX10_chr2:301690-302054	DCT	TM	OK	767663	463318	-0.728472	-2.23294	5e-05	0.000105404	yes
XLOC_003975	XLOC_003975	TcSYL_0104270	TcX10_chr15:126430-126692	DCT	TM	OK	249305	801351	-1.63741	-2.23324	5e-05	0.000105404	yes
XLOC_002193	XLOC_002193	TcSYL_0084160	TcX10_chr11:227895-228598	DCT	TM	OK	479123	305321	-0.65007	-2.24016	5e-05	0.000105404	yes
XLOC_000079	XLOC_000079	TcSYL_0001760	TcX10_chr1:742159-742514	DCT	TM	OK	126222	449963	-1.48808	-2.24036	5e-05	0.000105404	yes
XLOC_013964	XLOC_013964	TcSYL_0041730	TcX10_chr4:1169117-1169862	DCT	TM	OK	178739	342428	-2.38398	-2.24417	0.0008	0.00145085	yes
XLOC_004902	XLOC_004902	TcSYL_0113410	TcX10_chr18:381184-381683	DCT	TM	OK	303807	173489	-0.808312	-2.24504	5e-05	0.000105404	yes
XLOC_012273	XLOC_012273	TcSYL_0174730	TcX10_chr37:450919-451724	DCT	TM	OK	268678	165729	-0.697058	-2.24599	5e-05	0.000105404	yes
XLOC_015746	XLOC_015746	TcSYL_0191490	TcX10_chr42:313004-314187	DCT	TM	OK	147009	892739	-0.719595	-2.24902	5e-05	0.000105404	yes
XLOC_015241	XLOC_015241	TcSYL_0188960	TcX10_chr41:293034-293629	DCT	TM	OK	220398	125663	-0.810554	-2.25074	5e-05	0.000105404	yes
XLOC_013702	XLOC_013702	TcSYL_0036400	TcX10_chr4:462964-464807	DCT	TM	OK	539014	0.572305	-3.23547	-2.25176	0.0025	0.00420538	yes
XLOC_012432	XLOC_012432	TcSYL_0174970	TcX10_chr38:95966-96681	DCT	TM	OK	393801	247741	-0.668633	-2.25254	5e-05	0.000105404	yes
XLOC_014526	XLOC_014526	TcSYL_0040250	TcX10_chr4:991822-992315	DCT	TM	OK	235146	129297	-0.862863	-2.25399	5e-05	0.000105404	yes
XLOC_008646	XLOC_008646	TcSYL_0145900	TcX10_chr28:359908-360155	DCT	TM	OK	427854	166886	-1.35825	-2.25479	5e-05	0.000105404	yes
XLOC_007757	XLOC_007757	TcSYL_0137910	TcX10_chr24:639156-640849	DCT	TM	OK	145.25	920658	-0.657797	-2.25609	5e-05	0.000105404	yes
XLOC_007401	XLOC_007401	TcSYL_0131410	TcX10_chr23:537233-538644	DCT	TM	OK	153133	954227	-0.682382	-2.25688	5e-05	0.000105404	yes
XLOC_019900	XLOC_019900	TcSYL_0073860	TcX10_chr8:869301-869953	DCT	TM	OK	196963	112385	-0.809467	-2.25816	5e-05	0.000105404	yes
XLOC_002763	XLOC_002763	TcSYL_0094590	TcX10_chr13:414714-415894	DCT	TM	OK	145324	881676	-0.720954	-2.25895	5e-05	0.000105404	yes
XLOC_006384	XLOC_006384	TcSYL_0122480	TcX10_chr21:404930-405168	DCT	TM	OK	327982	150212	-1.12662	-2.25916	0.0056	0.00881648	yes
XLOC_019875	XLOC_019875	TcSYL_0073610	TcX10_chr8:816121-817679	DCT	TM	OK	350767	228662	-0.617294	-2.26177	5e-05	0.000105404	yes
XLOC_014746	XLOC_014746	TcSYL_0043550	TcX10_chr4:1324861-1325462	DCT	TM	OK	130066	658123	-0.982816	-2.26279	5e-05	0.000105404	yes
XLOC_019760	XLOC_019760	TcSYL_0071540	TcX10_chr7:2102105-2102886	DCT	TM	OK	216667	5429	-1.99672	-2.26472	0.0002	0.000392633	yes
XLOC_012266	XLOC_012266	TcSYL_0174660	TcX10_chr37:434220-435373	DCT	TM	OK	139841	840027	-0.73528	-2.27604	5e-05	0.000105404	yes
XLOC_019231	XLOC_019231	TcSYL_0071480	TcX10_chr7:2098091-2098575	DCT	TM	OK	103961	410425	-1.34086	-2.2768	0.0001	0.000203386	yes
XLOC_010891	XLOC_010891	TcSYL_0158750	TcX10_chr32:524298-524524	DCT	TM	OK	955719	415504	-1.20172	-2.27758	5e-05	0.000105404	yes
XLOC_000821	XLOC_000821	TcSYL_0000980	TcX10_chr1:366967-367331	DCT	TM	OK	473288	261791	-0.854305	-2.28032	5e-05	0.000105404	yes
XLOC_016875	XLOC_016875	TcSYL_0203450	TcX10_chr46:314879-315996	DCT	TM	OK	243717	866013	-1.49275	-2.28469	0.00015	0.000298501	yes
XLOC_010878	XLOC_010878	TcSYL_0158520	TcX10_chr32:510064-511487	DCT	TM	OK	143527	885862	-0.696167	-2.2859	5e-05	0.000105404	yes
XLOC_001459	XLOC_001459	TcSYL_0013970	TcX10_chr1:2887402-2887961	DCT	TM	OK	225029	125859	-0.838308	-2.2862	5e-05	0.000105404	yes
XLOC_000991	XLOC_000991	TcSYL_0005490	TcX10_chr1:1375159-1375478	DCT	TM	OK	403351	202386	-0.994928	-2.2886	5e-05	0.000105404	yes
XLOC_010599	XLOC_010599	TcSYL_0156730	TcX10_chr31:416661-417346	DCT	TM	OK	198589	113.7	-0.804549	-2.28879	5e-05	0.000105404	yes
XLOC_012281	XLOC_012281	TcSYL_0174810	TcX10_chr37:470127-471601	DCT	TM	OK	137367	845917	-0.699444	-2.29647	5e-05	0.000105404	yes
XLOC_012591	XLOC_012591	TcSYL_0177240	TcX10_chr38:337028-338277	DCT	TM	OK	103411	60064	-0.783825	-2.29808	5e-05	0.000105404	yes
XLOC_001861	XLOC_001861	TcSYL_0085290	TcX10_chr11:383548-384194	DCT	TM	OK	259795	151276	-0.780192	-2.29938	5e-05	0.000105404	yes
XLOC_005839	XLOC_005839	TcSYL_0019230	TcX10_chr2:748857-753004	DCT	TM	OK	133512	865313	-0.625673	-2.30488	5e-05	0.000105404	yes
XLOC_011714	XLOC_011714	TcSYL_0166970	TcX10_chr35:259481-260475	DCT	TM	OK	205952	125693	-0.712403	-2.308	5e-05	0.000105404	yes
XLOC_003921	XLOC_003921	TcSYL_0108190	TcX10_chr15:793575-793819	DCT	TM	OK	323151	951182	-1.76441	-2.31312	5e-05	0.000105404	yes
XLOC_005035	XLOC_005035	TcSYL_0115130	TcX10_chr19:249778-250634	DCT	TM	OK	457.73	290223	-0.657335	-2.31606	5e-05	0.000105404	yes
XLOC_001922	XLOC_001922	TcSYL_0086210	TcX10_chr11:490326-490582	DCT	TM	OK	884346	11329	-2.96459	-2.31944	0.0041	0.00661172	yes
XLOC_002177	XLOC_002177	TcSYL_0084000	TcX10_chr11:137855-138348	DCT	TM	OK	127986	553455	-1.20945	-2.32084	5e-05	0.000105404	yes
XLOC_006226	XLOC_006226	TcSYL_0118100	TcX10_chr20:150353-150681	DCT	TM	OK	299185	136894	-1.12797	-2.32239	5e-05	0.000105404	yes
XLOC_001450	XLOC_001450	TcSYL_0013880	TcX10_chr1:2850122-2851185	DCT	TM	OK	374785	237479	-0.65826	-2.32535	5e-05	0.000105404	yes
XLOC_017218	XLOC_017218	TcSYL_0047180	TcX10_chr5:730640-730959	DCT	TM	OK	382792	187474	-1.02987	-2.3339	5e-05	0.000105404	yes
XLOC_002065	XLOC_002065	TcSYL_0088120	TcX10_chr11:870248-870516	DCT	TM	OK	180158	650022	-1.4707	-2.33698	0.0006	0.00110941	yes
XLOC_014944	XLOC_014944	TcSYL_0186350	TcX10_chr40:401413-402314	DCT	TM	OK	574905	26922	-1.09454	-2.34091	5e-05	0.000105404	yes
XLOC_008518	XLOC_008518	TcSYL_0142770	TcX10_chr27:343590-345079	DCT	TM	OK	343378	220.41	-0.639609	-2.34199	5e-05	0.000105404	yes
XLOC_004911	XLOC_004911	TcSYL_0113780	TcX10_chr18:468399-468712	DCT	TM	OK	405.02	195996	-1.04717	-2.34328	5e-05	0.000105404	yes
XLOC_001630	XLOC_001630	TcSYL_0083030	TcX10_chr10:938270-938637	DCT	TM	OK	272.73	128325	-1.08767	-2.34338	5e-05	0.000105404	yes
XLOC_003967	XLOC_003967	TcSYL_0104100	TcX10_chr15:116460-116800	DCT	TM	OK	545115	297967	-0.871408	-2.34353	5e-05	0.000105404	yes
XLOC_001858	XLOC_001858	TcSYL_0085250	TcX10_chr11:381878-382284	DCT	TM	OK	320148	169063	-0.921175	-2.34516	5e-05	0.000105404	yes
XLOC_011839	XLOC_011839	TcSYL_0169040	TcX10_chr36:125922-126406	DCT	TM	OK	245457	130568	-0.910665	-2.34561	5e-05	0.000105404	yes
XLOC_012936	XLOC_012936	TcSYL_0181730	TcX10_chr39:323872-324158	DCT	TM	OK	893.54	485.09	-0.88128	-2.35046	5e-05	0.000105404	yes
XLOC_004026	XLOC_004026	TcSYL_0104870	TcX10_chr15:209601-210295	DCT	TM	OK	126525	652794	-0.95472	-2.3507	5e-05	0.000105404	yes
XLOC_007411	XLOC_007411	TcSYL_0131510	TcX10_chr23:545660-546102	DCT	TM	OK	221906	111613	-0.99145	-2.3536	5e-05	0.000105404	yes
XLOC_006037	XLOC_006037	TcSYL_0118170	TcX10_chr20:177879-178936	DCT	TM	OK	249571	154036	-0.696185	-2.35529	5e-05	0.000105404	yes
XLOC_003590	XLOC_003590	TcSYL_0100130	TcX10_chr14:243513-243985	DCT	TM	OK	298835	163539	-0.869716	-2.35622	5e-05	0.000105404	yes
XLOC_013721	XLOC_013721	TcSYL_0036640	TcX10_chr4:480256-481913	DCT	TM	OK	554878	0.58237	-3.25216	-2.35828	0.0047	0.00748991	yes
XLOC_009780	XLOC_009780	TcSYL_0148400	TcX10_chr30:17432-18021	DCT	TM	OK	422334	118381	-1.83494	-2.35876	0.0001	0.000203386	yes
XLOC_004202	XLOC_004202	TcSYL_0107310	TcX10_chr15:618580-618884	DCT	TM	OK	853205	482568	-0.822161	-2.35887	5e-05	0.000105404	yes
XLOC_000992	XLOC_000992	TcSYL_0005500	TcX10_chr1:1375503-1375729	DCT	TM	OK	521.72	164327	-1.66671	-2.35901	5e-05	0.000105404	yes
XLOC_008603	XLOC_008603	TcSYL_0145210	TcX10_chr28:293834-294486	DCT	TM	OK	789196	497909	-0.664502	-2.35986	5e-05	0.000105404	yes
XLOC_008669	XLOC_008669	TcSYL_0146340	TcX10_chr28:552554-553209	DCT	TM	OK	253367	147205	-0.783398	-2.35987	5e-05	0.000105404	yes
XLOC_020440	XLOC_020440	TcSYL_0075610	TcX10_chr9:497084-497388	DCT	TM	OK	440.81	213.46	-1.04619	-2.36037	5e-05	0.000105404	yes
XLOC_000235	XLOC_000235	TcSYL_0004470	TcX10_chr1:1187104-1188764	DCT	TM	OK	286173	182662	-0.647711	-2.3634	5e-05	0.000105404	yes
XLOC_010691	XLOC_010691	TcSYL_0158190	TcX10_chr32:488028-488368	DCT	TM	OK	775657	440972	-0.814731	-2.36349	5e-05	0.000105404	yes
XLOC_017638	XLOC_017638	TcSYL_0050760	TcX10_chr6:211848-212203	DCT	TM	OK	1101.88	666745	-0.72476	-2.36713	5e-05	0.000105404	yes
XLOC_000709	XLOC_000709	TcSYL_0014140	TcX10_chr1:2954110-2954834	DCT	TM	OK	146954	791167	-0.893311	-2.37139	5e-05	0.000105404	yes
XLOC_002210	XLOC_002210	TcSYL_0084430	TcX10_chr11:307152-307432	DCT	TM	OK	571262	269323	-1.08481	-2.3782	5e-05	0.000105404	yes
XLOC_006534	XLOC_006534	TcSYL_0122270	TcX10_chr21:320696-321066	DCT	TM	OK	358386	182449	-0.974024	-2.37949	5e-05	0.000105404	yes
XLOC_020119	XLOC_020119	TcSYL_0077240	TcX10_chr9:664727-665484	DCT	TM	OK	526426	329624	-0.675411	-2.37995	5e-05	0.000105404	yes
XLOC_008289	XLOC_008289	TcSYL_0139740	TcX10_chr26:293254-294299	DCT	TM	OK	202151	121804	-0.730867	-2.38044	5e-05	0.000105404	yes
XLOC_001313	XLOC_001313	TcSYL_0011110	TcX10_chr1:2190051-2190559	DCT	TM	OK	244897	131563	-0.896418	-2.38262	5e-05	0.000105404	yes
XLOC_004005	XLOC_004005	TcSYL_0104650	TcX10_chr15:179502-181450	DCT	TM	OK	892.58	552491	-0.69203	-2.38437	5e-05	0.000105404	yes
XLOC_019866	XLOC_019866	TcSYL_0073520	TcX10_chr8:784365-784636	DCT	TM	OK	595468	291057	-1.03272	-2.38792	5e-05	0.000105404	yes
XLOC_010947	XLOC_010947	TcSYL_0159540	TcX10_chr32:694589-695169	DCT	TM	OK	196662	106051	-0.890966	-2.38982	5e-05	0.000105404	yes
XLOC_001127	XLOC_001127	TcSYL_0008000	TcX10_chr1:1630646-1631286	DCT	TM	OK	400249	241.4	-0.729473	-2.39233	5e-05	0.000105404	yes
XLOC_013917	XLOC_013917	TcSYL_0040370	TcX10_chr4:998691-998911	DCT	TM	OK	1325.34	604367	-1.13287	-2.39656	5e-05	0.000105404	yes
XLOC_012953	XLOC_012953	TcSYL_0182020	TcX10_chr39:339686-339924	DCT	TM	OK	707993	289126	-1.29204	-2.39743	5e-05	0.000105404	yes
XLOC_014625	XLOC_014625	TcSYL_0041950	TcX10_chr4:1188411-1188811	DCT	TM	OK	473333	397523	-3.57374	-2.39795	0.0019	0.00325027	yes
XLOC_001620	XLOC_001620	TcSYL_0082920	TcX10_chr10:920012-920319	DCT	TM	OK	593889	306666	-0.953523	-2.39898	5e-05	0.000105404	yes
XLOC_011943	XLOC_011943	TcSYL_0170440	TcX10_chr36:366029-366999	DCT	TM	OK	434555	270438	-0.68424	-2.39943	5e-05	0.000105404	yes
XLOC_010523	XLOC_010523	TcSYL_0155840	TcX10_chr31:7879-8876	DCT	TM	OK	271524	167581	-0.696222	-2.40026	5e-05	0.000105404	yes
XLOC_005651	XLOC_005651	TcSYL_0014730	TcX10_chr2:29690-30330	DCT	TM	OK	318828	188159	-0.760821	-2.40064	5e-05	0.000105404	yes
XLOC_001687	XLOC_001687	TcSYL_0080490	TcX10_chr10:196280-196581	DCT	TM	OK	656134	344199	-0.930748	-2.40143	5e-05	0.000105404	yes
XLOC_000022	XLOC_000022	TcSYL_0000460	TcX10_chr1:125865-126400	DCT	TM	OK	442492	262106	-0.755502	-2.40193	5e-05	0.000105404	yes
XLOC_008351	XLOC_008351	TcSYL_0140440	TcX10_chr26:421304-422613	DCT	TM	OK	751599	476921	-0.656211	-2.40728	5e-05	0.000105404	yes
XLOC_008335	XLOC_008335	TcSYL_0140260	TcX10_chr26:401918-402702	DCT	TM	OK	247568	145207	-0.769714	-2.40833	5e-05	0.000105404	yes
XLOC_000046	XLOC_000046	TcSYL_0001160	TcX10_chr1:440476-441200	DCT	TM	OK	327564	195727	-0.742936	-2.40923	5e-05	0.000105404	yes
XLOC_000084	XLOC_000084	TcSYL_0001820	TcX10_chr1:745947-746395	DCT	TM	OK	136201	564134	-1.27163	-2.4094	5e-05	0.000105404	yes
XLOC_006461	XLOC_006461	TcSYL_0123760	TcX10_chr21:691246-692699	DCT	TM	OK	767847	484.02	-0.665751	-2.4108	5e-05	0.000105404	yes
XLOC_013511	XLOC_013511	TcSYL_0033110	TcX10_chr4:242653-243710	DCT	TM	OK	10502	146488	-2.84181	-2.41117	0.0012	0.00211643	yes
XLOC_016613	XLOC_016613	TcSYL_0201700	TcX10_chr44:399910-400163	DCT	TM	OK	344522	110713	-1.63778	-2.41227	5e-05	0.000105404	yes
XLOC_007398	XLOC_007398	TcSYL_0131380	TcX10_chr23:534006-534712	DCT	TM	OK	547547	340408	-0.685718	-2.41398	5e-05	0.000105404	yes
XLOC_005695	XLOC_005695	TcSYL_0016250	TcX10_chr2:404426-404901	DCT	TM	OK	579045	343957	-0.751446	-2.41496	5e-05	0.000105404	yes
XLOC_002344	XLOC_002344	TcSYL_0089150	TcX10_chr12:117746-118908	DCT	TM	OK	158665	937036	-0.759809	-2.41511	5e-05	0.000105404	yes
XLOC_005122	XLOC_005122	TcSYL_0116560	TcX10_chr19:691543-693122	DCT	TM	OK	401368	254414	-0.657747	-2.42423	5e-05	0.000105404	yes
XLOC_017142	XLOC_017142	TcSYL_0046340	TcX10_chr5:499433-500019	DCT	TM	OK	392.37	230308	-0.76865	-2.42541	5e-05	0.000105404	yes
XLOC_004900	XLOC_004900	TcSYL_0113390	TcX10_chr18:375905-376593	DCT	TM	OK	348.92	208024	-0.746144	-2.42769	5e-05	0.000105404	yes
XLOC_008058	XLOC_008058	TcSYL_0138420	TcX10_chr25:83871-84208	DCT	TM	OK	253121	107654	-1.23342	-2.42871	5e-05	0.000105404	yes
XLOC_017449	XLOC_017449	TcSYL_0047900	TcX10_chr5:987722-988476	DCT	TM	OK	1017.81	644307	-0.659643	-2.43043	5e-05	0.000105404	yes
XLOC_002683	XLOC_002683	TcSYL_0092100	TcX10_chr12:938030-938397	DCT	TM	OK	1809.09	1126.55	-0.683353	-2.43133	5e-05	0.000105404	yes
XLOC_007226	XLOC_007226	TcSYL_0132940	TcX10_chr23:682324-682802	DCT	TM	OK	511423	298886	-0.774924	-2.43569	5e-05	0.000105404	yes
XLOC_013729	XLOC_013729	TcSYL_0036760	TcX10_chr4:489060-489439	DCT	TM	OK	406145	518274	-2.97021	-2.43666	0.00285	0.00474248	yes
XLOC_002220	XLOC_002220	TcSYL_0084720	TcX10_chr11:325078-325382	DCT	TM	OK	228181	799114	-1.5137	-2.43721	5e-05	0.000105404	yes
XLOC_011540	XLOC_011540	TcSYL_0164840	TcX10_chr34:401050-401285	DCT	TM	OK	532292	193883	-1.45704	-2.43748	5e-05	0.000105404	yes
XLOC_008137	XLOC_008137	TcSYL_0139190	TcX10_chr26:45609-46414	DCT	TM	OK	450315	278326	-0.694159	-2.43846	5e-05	0.000105404	yes
XLOC_004848	XLOC_004848	TcSYL_0114880	TcX10_chr18:705786-707386	DCT	TM	OK	260155	162879	-0.675572	-2.43931	5e-05	0.000105404	yes
XLOC_010863	XLOC_010863	TcSYL_0158260	TcX10_chr32:492880-493169	DCT	TM	OK	311299	121154	-1.36145	-2.44073	5e-05	0.000105404	yes
XLOC_004495	XLOC_004495	TcSYL_0112070	TcX10_chr16:1296996-1297549	DCT	TM	OK	196177	101603	-0.949214	-2.44605	5e-05	0.000105404	yes
XLOC_018455	XLOC_018455	TcSYL_0057200	TcX10_chr6:974649-975343	DCT	TM	OK	348846	205595	-0.762789	-2.44728	5e-05	0.000105404	yes
XLOC_002675	XLOC_002675	TcSYL_0092020	TcX10_chr12:905057-905751	DCT	TM	OK	212582	119558	-0.83031	-2.44821	5e-05	0.000105404	yes
XLOC_013087	XLOC_013087	TcSYL_0179240	TcX10_chr39:83141-83772	DCT	TM	OK	138049	688106	-1.00448	-2.45616	5e-05	0.000105404	yes
XLOC_000301	XLOC_000301	TcSYL_0005260	TcX10_chr1:1360234-1360772	DCT	TM	OK	264534	144075	-0.876635	-2.45693	5e-05	0.000105404	yes
XLOC_016619	XLOC_016619	TcSYL_0201780	TcX10_chr44:414895-415298	DCT	TM	OK	372746	193496	-0.945885	-2.4574	5e-05	0.000105404	yes
XLOC_004509	XLOC_004509	TcSYL_0112210	TcX10_chr16:1321553-1322181	DCT	TM	OK	104885	481151	-1.12424	-2.45927	5e-05	0.000105404	yes
XLOC_008872	XLOC_008872	TcSYL_0146710	TcX10_chr29:80553-80755	DCT	TM	OK	454151	172.04	-1.40042	-2.46103	0.0102	0.0154418	yes
XLOC_004323	XLOC_004323	TcSYL_0108850	TcX10_chr15:907293-907762	DCT	TM	OK	417218	234275	-0.832598	-2.46139	5e-05	0.000105404	yes
XLOC_018933	XLOC_018933	TcSYL_0065890	TcX10_chr7:1372483-1372919	DCT	TM	OK	392223	475381	-3.04452	-2.46341	0.0017	0.00292733	yes
XLOC_011258	XLOC_011258	TcSYL_0162820	TcX10_chr33:303592-304478	DCT	TM	OK	249091	147363	-0.757304	-2.46653	5e-05	0.000105404	yes
XLOC_000915	XLOC_000915	TcSYL_0003020	TcX10_chr1:874991-875760	DCT	TM	OK	476722	293364	-0.700454	-2.46692	5e-05	0.000105404	yes
XLOC_003734	XLOC_003734	TcSYL_0102590	TcX10_chr14:823106-823749	DCT	TM	OK	200191	107856	-0.892274	-2.46914	5e-05	0.000105404	yes
XLOC_014959	XLOC_014959	TcSYL_0186580	TcX10_chr40:416680-417338	DCT	TM	OK	102476	476313	-1.1053	-2.47103	5e-05	0.000105404	yes
XLOC_016593	XLOC_016593	TcSYL_0201460	TcX10_chr44:285704-286941	DCT	TM	OK	122657	696488	-0.816454	-2.4713	5e-05	0.000105404	yes
XLOC_001974	XLOC_001974	TcSYL_0086740	TcX10_chr11:647508-647773	DCT	TM	OK	907894	455418	-0.995333	-2.47146	5e-05	0.000105404	yes
XLOC_002008	XLOC_002008	TcSYL_0087260	TcX10_chr11:777698-777897	DCT	TM	OK	846927	428011	-0.984591	-2.47368	0.02695	0.0380944	yes
XLOC_007480	XLOC_007480	TcSYL_0132350	TcX10_chr23:600103-600677	DCT	TM	OK	152.61	743741	-1.03697	-2.47477	5e-05	0.000105404	yes
XLOC_011136	XLOC_011136	TcSYL_0163780	TcX10_chr33:456567-457396	DCT	TM	OK	953144	460721	-1.0488	-2.48152	5e-05	0.000105404	yes
XLOC_004678	XLOC_004678	TcSYL_0111040	TcX10_chr16:950534-950796	DCT	TM	OK	176.98	544659	-1.70016	-2.48347	0.0005	0.000936402	yes
XLOC_012262	XLOC_012262	TcSYL_0174620	TcX10_chr37:417279-418396	DCT	TM	OK	203772	120964	-0.752378	-2.48457	5e-05	0.000105404	yes
XLOC_004337	XLOC_004337	TcSYL_0109550	TcX10_chr16:336847-337550	DCT	TM	OK	539816	331889	-0.701769	-2.4861	5e-05	0.000105404	yes
XLOC_013067	XLOC_013067	TcSYL_0178990	TcX10_chr39:40503-40774	DCT	TM	OK	305175	138777	-1.13687	-2.49214	0.00015	0.000298501	yes
XLOC_004279	XLOC_004279	TcSYL_0108280	TcX10_chr15:803133-803467	DCT	TM	OK	288186	124037	-1.21623	-2.49293	5e-05	0.000105404	yes
XLOC_011732	XLOC_011732	TcSYL_0167150	TcX10_chr35:323443-324224	DCT	TM	OK	492903	302107	-0.706242	-2.4965	5e-05	0.000105404	yes
XLOC_001831	XLOC_001831	TcSYL_0084850	TcX10_chr11:345419-345972	DCT	TM	OK	701496	425133	-0.722521	-2.49877	5e-05	0.000105404	yes
XLOC_007513	XLOC_007513	TcSYL_0132870	TcX10_chr23:646820-647085	DCT	TM	OK	612887	274.05	-1.16118	-2.50165	5e-05	0.000105404	yes
XLOC_019880	XLOC_019880	TcSYL_0073660	TcX10_chr8:823249-823874	DCT	TM	OK	1447.01	903705	-0.679148	-2.50501	5e-05	0.000105404	yes
XLOC_020101	XLOC_020101	TcSYL_0076980	TcX10_chr9:647464-648926	DCT	TM	OK	154486	917598	-0.75154	-2.5072	5e-05	0.000105404	yes
XLOC_010761	XLOC_010761	TcSYL_0159800	TcX10_chr32:868210-869504	DCT	TM	OK	967973	531051	-0.866116	-2.50782	5e-05	0.000105404	yes
XLOC_000341	XLOC_000341	TcSYL_0005840	TcX10_chr1:1395811-1396082	DCT	TM	OK	460005	190.09	-1.27497	-2.51066	5e-05	0.000105404	yes
XLOC_008088	XLOC_008088	TcSYL_0138730	TcX10_chr25:200895-201139	DCT	TM	OK	3448.16	1997.89	-0.78735	-2.51075	5e-05	0.000105404	yes
XLOC_005240	XLOC_005240	TcSYL_0015220	TcX10_chr2:279037-279542	DCT	TM	OK	220889	110413	-1.00041	-2.51539	5e-05	0.000105404	yes
XLOC_000365	XLOC_000365	TcSYL_0006140	TcX10_chr1:1447178-1448094	DCT	TM	OK	198812	113362	-0.810471	-2.5165	5e-05	0.000105404	yes
XLOC_005100	XLOC_005100	TcSYL_0116290	TcX10_chr19:650246-650907	DCT	TM	OK	306205	556784	-2.45931	-2.51843	0.0003	0.000575222	yes
XLOC_011380	XLOC_011380	TcSYL_0164810	TcX10_chr34:399362-400158	DCT	TM	OK	122617	625198	-0.971776	-2.51868	5e-05	0.000105404	yes
XLOC_000102	XLOC_000102	TcSYL_0002000	TcX10_chr1:795926-796506	DCT	TM	OK	277416	151947	-0.868478	-2.52102	5e-05	0.000105404	yes
XLOC_008205	XLOC_008205	TcSYL_0140830	TcX10_chr26:557837-558729	DCT	TM	OK	184874	333661	-2.47009	-2.52109	0.00045	0.000846532	yes
XLOC_010825	XLOC_010825	TcSYL_0157550	TcX10_chr32:450403-450977	DCT	TM	OK	1586.22	983398	-0.689749	-2.52293	5e-05	0.000105404	yes
XLOC_018470	XLOC_018470	TcSYL_0057350	TcX10_chr6:1004144-1004496	DCT	TM	OK	154169	497028	-1.63312	-2.52372	5e-05	0.000105404	yes
XLOC_018461	XLOC_018461	TcSYL_0057260	TcX10_chr6:986676-987514	DCT	TM	OK	450.71	274908	-0.713249	-2.5242	5e-05	0.000105404	yes
XLOC_014655	XLOC_014655	TcSYL_0042380	TcX10_chr4:1217980-1218311	DCT	TM	OK	382986	177193	-1.11197	-2.5245	5e-05	0.000105404	yes
XLOC_010904	XLOC_010904	TcSYL_0158930	TcX10_chr32:538701-538918	DCT	TM	OK	350191	124493	-1.49208	-2.52558	0.00445	0.00712452	yes
XLOC_004496	XLOC_004496	TcSYL_0112080	TcX10_chr16:1297856-1298295	DCT	TM	OK	918585	549954	-0.740102	-2.52598	5e-05	0.000105404	yes
XLOC_020065	XLOC_020065	TcSYL_0076510	TcX10_chr9:606503-606786	DCT	TM	OK	672824	323739	-1.0554	-2.52621	5e-05	0.000105404	yes
XLOC_000195	XLOC_000195	TcSYL_0004070	TcX10_chr1:1091243-1092750	DCT	TM	OK	179.35	107833	-0.733982	-2.5291	5e-05	0.000105404	yes
XLOC_016252	XLOC_016252	TcSYL_0196690	TcX10_chr43:152753-153003	DCT	TM	OK	1550.92	801837	-0.951739	-2.52984	5e-05	0.000105404	yes
XLOC_007676	XLOC_007676	TcSYL_0136190	TcX10_chr24:271434-271720	DCT	TM	OK	205684	569392	-1.85293	-2.53043	5e-05	0.000105404	yes
XLOC_009355	XLOC_009355	TcSYL_0027650	TcX10_chr3:1376049-1376686	DCT	TM	OK	173848	875761	-0.989216	-2.53904	5e-05	0.000105404	yes
XLOC_010581	XLOC_010581	TcSYL_0156550	TcX10_chr31:347817-348709	DCT	TM	OK	673871	296598	-1.18397	-2.54161	5e-05	0.000105404	yes
XLOC_007379	XLOC_007379	TcSYL_0131110	TcX10_chr23:517202-517749	DCT	TM	OK	371688	208544	-0.833739	-2.54261	5e-05	0.000105404	yes
XLOC_006208	XLOC_006208	TcSYL_0121230	TcX10_chr20:554516-555156	DCT	TM	OK	4332.77	2570.09	-0.753468	-2.54396	5e-05	0.000105404	yes
XLOC_012124	XLOC_012124	TcSYL_0172080	TcX10_chr37:132268-132734	DCT	TM	OK	314007	162942	-0.946442	-2.54522	5e-05	0.000105404	yes
XLOC_006365	XLOC_006365	TcSYL_0121430	TcX10_chr21:6796-7376	DCT	TM	OK	383566	218716	-0.810416	-2.54525	5e-05	0.000105404	yes
XLOC_004582	XLOC_004582	TcSYL_0109330	TcX10_chr16:189296-190167	DCT	TM	OK	329539	196596	-0.745217	-2.54902	5e-05	0.000105404	yes
XLOC_010760	XLOC_010760	TcSYL_0159790	TcX10_chr32:863096-863295	DCT	TM	OK	323582	886408	-1.86809	-2.55494	0.0107	0.0161406	yes
XLOC_013995	XLOC_013995	TcSYL_0042760	TcX10_chr4:1244156-1244388	DCT	TM	OK	438565	112766	-1.95946	-2.55502	5e-05	0.000105404	yes
XLOC_006538	XLOC_006538	TcSYL_0122310	TcX10_chr21:331949-335469	DCT	TM	OK	663154	391458	-0.760484	-2.55579	5e-05	0.000105404	yes
XLOC_008354	XLOC_008354	TcSYL_0140470	TcX10_chr26:428075-429210	DCT	TM	OK	439938	271334	-0.69723	-2.55594	5e-05	0.000105404	yes
XLOC_007499	XLOC_007499	TcSYL_0132640	TcX10_chr23:620269-620720	DCT	TM	OK	385627	206085	-0.903964	-2.55661	5e-05	0.000105404	yes
XLOC_000191	XLOC_000191	TcSYL_0004030	TcX10_chr1:1085970-1086517	DCT	TM	OK	271724	144295	-0.913121	-2.56244	5e-05	0.000105404	yes
XLOC_017102	XLOC_017102	TcSYL_0045890	TcX10_chr5:375509-376011	DCT	TM	OK	4365.47	2650.61	-0.719811	-2.56272	5e-05	0.000105404	yes
XLOC_008177	XLOC_008177	TcSYL_0140510	TcX10_chr26:454771-455408	DCT	TM	OK	519282	306.85	-0.758986	-2.56357	5e-05	0.000105404	yes
XLOC_014591	XLOC_014591	TcSYL_0041380	TcX10_chr4:1113895-1114295	DCT	TM	OK	543637	489457	-3.47339	-2.56469	0.0014	0.00244073	yes
XLOC_014579	XLOC_014579	TcSYL_0041220	TcX10_chr4:1068837-1069378	DCT	TM	OK	287394	152679	-0.912525	-2.5677	5e-05	0.000105404	yes
XLOC_004196	XLOC_004196	TcSYL_0107250	TcX10_chr15:611952-612169	DCT	TM	OK	903254	303355	-1.57413	-2.57075	5e-05	0.000105404	yes
XLOC_001969	XLOC_001969	TcSYL_0086690	TcX10_chr11:637102-637598	DCT	TM	OK	305137	161.29	-0.919797	-2.57113	5e-05	0.000105404	yes
XLOC_004588	XLOC_004588	TcSYL_0109390	TcX10_chr16:211715-212352	DCT	TM	OK	231433	123536	-0.905665	-2.57439	5e-05	0.000105404	yes
XLOC_008325	XLOC_008325	TcSYL_0140150	TcX10_chr26:383303-384810	DCT	TM	OK	576.29	354.25	-0.702027	-2.58107	5e-05	0.000105404	yes
XLOC_010865	XLOC_010865	TcSYL_0158280	TcX10_chr32:494182-494651	DCT	TM	OK	273455	140979	-0.955827	-2.58417	5e-05	0.000105404	yes
XLOC_002211	XLOC_002211	TcSYL_0084480	TcX10_chr11:309659-309879	DCT	TM	OK	785656	223554	-1.81328	-2.5858	5e-05	0.000105404	yes
XLOC_003880	XLOC_003880	TcSYL_0106140	TcX10_chr15:303069-303937	DCT	TM	OK	169036	113378	-3.89812	-2.58868	0.00265	0.00443699	yes
XLOC_000827	XLOC_000827	TcSYL_0001040	TcX10_chr1:389143-390347	DCT	TM	OK	220732	130135	-0.76229	-2.58934	5e-05	0.000105404	yes
XLOC_007193	XLOC_007193	TcSYL_0131750	TcX10_chr23:563897-564201	DCT	TM	OK	650649	321744	-1.01597	-2.59076	5e-05	0.000105404	yes
XLOC_010592	XLOC_010592	TcSYL_0156660	TcX10_chr31:394341-394657	DCT	TM	OK	2594.42	1569.72	-0.724908	-2.59108	5e-05	0.000105404	yes
XLOC_003800	XLOC_003800	TcSYL_0103550	TcX10_chr14:900102-901660	DCT	TM	OK	257897	156505	-0.72059	-2.59114	5e-05	0.000105404	yes
XLOC_003522	XLOC_003522	TcSYL_0102440	TcX10_chr14:814131-814432	DCT	TM	OK	117584	203747	-2.52885	-2.59517	0.00035	0.000666532	yes
XLOC_002042	XLOC_002042	TcSYL_0087840	TcX10_chr11:817488-817972	DCT	TM	OK	299649	153465	-0.965366	-2.60029	5e-05	0.000105404	yes
XLOC_012429	XLOC_012429	TcSYL_0174940	TcX10_chr38:90362-90843	DCT	TM	OK	148283	620359	-1.25718	-2.60042	5e-05	0.000105404	yes
XLOC_000503	XLOC_000503	TcSYL_0010030	TcX10_chr1:1972945-1973588	DCT	TM	OK	5028.28	2914.49	-0.786818	-2.6007	5e-05	0.000105404	yes
XLOC_015181	XLOC_015181	TcSYL_0188170	TcX10_chr41:234895-235730	DCT	TM	OK	135181	699799	-0.949876	-2.6048	5e-05	0.000105404	yes
XLOC_011615	XLOC_011615	TcSYL_0167480	TcX10_chr35:405289-407189	DCT	TM	OK	133557	782529	-0.771242	-2.60507	5e-05	0.000105404	yes
XLOC_003804	XLOC_003804	TcSYL_0103590	TcX10_chr14:908729-909630	DCT	TM	OK	211896	119192	-0.830062	-2.60745	5e-05	0.000105404	yes
XLOC_003547	XLOC_003547	TcSYL_0103250	TcX10_chr14:861556-861821	DCT	TM	OK	452386	167499	-1.4334	-2.61464	5e-05	0.000105404	yes
XLOC_010578	XLOC_010578	TcSYL_0156520	TcX10_chr31:336667-337049	DCT	TM	OK	1984.55	1200.7	-0.724931	-2.61802	5e-05	0.000105404	yes
XLOC_015279	XLOC_015279	TcSYL_0189510	TcX10_chr41:329763-330034	DCT	TM	OK	570915	240841	-1.2452	-2.62014	5e-05	0.000105404	yes
XLOC_008043	XLOC_008043	TcSYL_0138270	TcX10_chr25:34660-35429	DCT	TM	OK	151007	770114	-0.971474	-2.6221	5e-05	0.000105404	yes
XLOC_012851	XLOC_012851	TcSYL_0180380	TcX10_chr39:196488-197059	DCT	TM	OK	123327	529089	-1.2209	-2.62284	5e-05	0.000105404	yes
XLOC_012269	XLOC_012269	TcSYL_0174690	TcX10_chr37:444352-444797	DCT	TM	OK	312726	156288	-1.00069	-2.62359	5e-05	0.000105404	yes
XLOC_004843	XLOC_004843	TcSYL_0114790	TcX10_chr18:690585-691057	DCT	TM	OK	171044	743175	-1.20259	-2.62403	5e-05	0.000105404	yes
XLOC_012765	XLOC_012765	TcSYL_0178090	TcX10_chr38:394070-394476	DCT	TM	OK	306677	147844	-1.05265	-2.62451	5e-05	0.000105404	yes
XLOC_008286	XLOC_008286	TcSYL_0139710	TcX10_chr26:285968-287184	DCT	TM	OK	312269	187361	-0.736967	-2.62518	5e-05	0.000105404	yes
XLOC_010775	XLOC_010775	TcSYL_0159940	TcX10_chr32:918137-918849	DCT	TM	OK	127525	608067	-1.06848	-2.62843	5e-05	0.000105404	yes
XLOC_008494	XLOC_008494	TcSYL_0142530	TcX10_chr27:218691-219565	DCT	TM	OK	363031	214149	-0.761477	-2.6315	5e-05	0.000105404	yes
XLOC_003942	XLOC_003942	TcSYL_0103810	TcX10_chr15:46034-46503	DCT	TM	OK	102096	332796	-1.61722	-2.6329	5e-05	0.000105404	yes
XLOC_016587	XLOC_016587	TcSYL_0201400	TcX10_chr44:262015-263030	DCT	TM	OK	118375	608031	-0.961143	-2.63711	5e-05	0.000105404	yes
XLOC_015215	XLOC_015215	TcSYL_0188630	TcX10_chr41:266841-267142	DCT	TM	OK	94314	173283	-2.44435	-2.63906	0.00015	0.000298501	yes
XLOC_004032	XLOC_004032	TcSYL_0105010	TcX10_chr15:217063-217727	DCT	TM	OK	221542	116.84	-0.923044	-2.63966	5e-05	0.000105404	yes
XLOC_016566	XLOC_016566	TcSYL_0200830	TcX10_chr44:140135-140541	DCT	TM	OK	6030.75	3616.87	-0.737598	-2.64144	5e-05	0.000105404	yes
XLOC_002411	XLOC_002411	TcSYL_0090020	TcX10_chr12:315891-317218	DCT	TM	OK	517154	23534	-1.13585	-2.64368	5e-05	0.000105404	yes
XLOC_000142	XLOC_000142	TcSYL_0002840	TcX10_chr1:865082-865308	DCT	TM	OK	363943	132309	-1.4598	-2.64382	0.00115	0.00203727	yes
XLOC_010769	XLOC_010769	TcSYL_0159880	TcX10_chr32:897046-898421	DCT	TM	OK	423752	256617	-0.723603	-2.64706	5e-05	0.000105404	yes
XLOC_001299	XLOC_001299	TcSYL_0010960	TcX10_chr1:2150859-2151370	DCT	TM	OK	805189	473715	-0.765308	-2.64861	5e-05	0.000105404	yes
XLOC_010858	XLOC_010858	TcSYL_0158180	TcX10_chr32:487190-487902	DCT	TM	OK	348896	198664	-0.812471	-2.65028	5e-05	0.000105404	yes
XLOC_017412	XLOC_017412	TcSYL_0047530	TcX10_chr5:894676-894953	DCT	TM	OK	648162	290647	-1.15708	-2.65148	5e-05	0.000105404	yes
XLOC_019361	XLOC_019361	TcSYL_0062420	TcX10_chr7:224519-224892	DCT	TM	OK	788916	125285	-2.65466	-2.65247	0.0001	0.000203386	yes
XLOC_012434	XLOC_012434	TcSYL_0174990	TcX10_chr38:115072-115859	DCT	TM	OK	180176	952578	-0.919495	-2.65295	5e-05	0.000105404	yes
XLOC_012399	XLOC_012399	TcSYL_0174020	TcX10_chr37:300963-301639	DCT	TM	OK	187866	956455	-0.973935	-2.65381	5e-05	0.000105404	yes
XLOC_014790	XLOC_014790	TcSYL_0044070	TcX10_chr4:1381810-1382810	DCT	TM	OK	250.59	144.67	-0.792564	-2.65436	5e-05	0.000105404	yes
XLOC_013082	XLOC_013082	TcSYL_0179190	TcX10_chr39:74368-75269	DCT	TM	OK	307271	178636	-0.782491	-2.65745	5e-05	0.000105404	yes
XLOC_010822	XLOC_010822	TcSYL_0157490	TcX10_chr32:447758-448125	DCT	TM	OK	119571	333262	-1.84313	-2.65826	5e-05	0.000105404	yes
XLOC_012169	XLOC_012169	TcSYL_0172650	TcX10_chr37:174019-174341	DCT	TM	OK	598711	298087	-1.00612	-2.65828	5e-05	0.000105404	yes
XLOC_006398	XLOC_006398	TcSYL_0123040	TcX10_chr21:506521-507002	DCT	TM	OK	1137.37	680447	-0.741143	-2.65838	5e-05	0.000105404	yes
XLOC_000923	XLOC_000923	TcSYL_0003140	TcX10_chr1:884232-884725	DCT	TM	OK	288271	145786	-0.983569	-2.65892	5e-05	0.000105404	yes
XLOC_012786	XLOC_012786	TcSYL_0178650	TcX10_chr39:17265-17500	DCT	TM	OK	689808	242.95	-1.50554	-2.65994	5e-05	0.000105404	yes
XLOC_000181	XLOC_000181	TcSYL_0003830	TcX10_chr1:1071987-1073146	DCT	TM	OK	839217	505353	-0.731754	-2.66015	5e-05	0.000105404	yes
XLOC_020407	XLOC_020407	TcSYL_0075280	TcX10_chr9:365177-365622	DCT	TM	OK	471779	252577	-0.901389	-2.6643	5e-05	0.000105404	yes
XLOC_004986	XLOC_004986	TcSYL_0115890	TcX10_chr19:495914-496146	DCT	TM	OK	610498	193168	-1.66013	-2.6647	5e-05	0.000105404	yes
XLOC_020098	XLOC_020098	TcSYL_0076950	TcX10_chr9:635599-636653	DCT	TM	OK	554517	334949	-0.727289	-2.66496	5e-05	0.000105404	yes
XLOC_015554	XLOC_015554	TcSYL_0192200	TcX10_chr42:490123-490424	DCT	TM	OK	6484.73	3828.76	-0.760168	-2.66786	5e-05	0.000105404	yes
XLOC_017480	XLOC_017480	TcSYL_0048210	TcX10_chr5:1093451-1093662	DCT	TM	OK	1646.24	659222	-1.32034	-2.6692	5e-05	0.000105404	yes
XLOC_000736	XLOC_000736	TcSYL_0014410	TcX10_chr1:3051699-3052951	DCT	TM	OK	317622	113028	-1.49063	-2.67384	5e-05	0.000105404	yes
XLOC_012251	XLOC_012251	TcSYL_0174510	TcX10_chr37:380050-380825	DCT	TM	OK	165187	849785	-0.958933	-2.67696	5e-05	0.000105404	yes
XLOC_010949	XLOC_010949	TcSYL_0159560	TcX10_chr32:701766-702556	DCT	TM	OK	138874	689385	-1.0104	-2.67837	5e-05	0.000105404	yes
XLOC_012425	XLOC_012425	TcSYL_0174360	TcX10_chr37:324626-326136	DCT	TM	OK	155104	891316	-0.799229	-2.6842	5e-05	0.000105404	yes
XLOC_016639	XLOC_016639	TcSYL_0202090	TcX10_chr45:125631-126004	DCT	TM	OK	410273	196325	-1.06334	-2.68429	5e-05	0.000105404	yes
XLOC_006486	XLOC_006486	TcSYL_0121680	TcX10_chr21:117011-118146	DCT	TM	OK	173.81	970448	-0.840793	-2.68579	5e-05	0.000105404	yes
XLOC_012252	XLOC_012252	TcSYL_0174520	TcX10_chr37:380916-382018	DCT	TM	OK	206529	118458	-0.801964	-2.68777	5e-05	0.000105404	yes
XLOC_010770	XLOC_010770	TcSYL_0159890	TcX10_chr32:898568-898989	DCT	TM	OK	492725	258568	-0.930238	-2.696	5e-05	0.000105404	yes
XLOC_011740	XLOC_011740	TcSYL_0167230	TcX10_chr35:346126-346331	DCT	TM	OK	1233.43	372249	-1.72833	-2.69643	5e-05	0.000105404	yes
XLOC_020376	XLOC_020376	TcSYL_0074970	TcX10_chr9:230800-231011	DCT	TM	OK	2960.15	1909.12	-0.632765	-2.69933	0.00605	0.00946978	yes
XLOC_009003	XLOC_009003	TcSYL_0147240	TcX10_chr29:204072-204712	DCT	TM	OK	7723.67	4162.69	-0.891768	-2.70157	5e-05	0.000105404	yes
XLOC_012000	XLOC_012000	TcSYL_0171090	TcX10_chr36:467512-468074	DCT	TM	OK	246399	123354	-0.998188	-2.70268	5e-05	0.000105404	yes
XLOC_014592	XLOC_014592	TcSYL_0041390	TcX10_chr4:1114906-1115306	DCT	TM	OK	516818	364497	-3.82568	-2.70355	0.00225	0.00381537	yes
XLOC_015373	XLOC_015373	TcSYL_0187730	TcX10_chr41:127009-127871	DCT	TM	OK	402451	125203	-1.68454	-2.70499	5e-05	0.000105404	yes
XLOC_019359	XLOC_019359	TcSYL_0062390	TcX10_chr7:222379-223010	DCT	TM	OK	387774	767933	-2.33616	-2.70533	5e-05	0.000105404	yes
XLOC_006212	XLOC_006212	TcSYL_0121270	TcX10_chr20:574283-574767	DCT	TM	OK	316122	159986	-0.982539	-2.70562	5e-05	0.000105404	yes
XLOC_017489	XLOC_017489	TcSYL_0048330	TcX10_chr5:1101097-1101659	DCT	TM	OK	202992	978328	-1.05303	-2.70826	5e-05	0.000105404	yes
XLOC_005881	XLOC_005881	TcSYL_0019650	TcX10_chr2:880971-881815	DCT	TM	OK	242.17	134258	-0.851011	-2.70924	5e-05	0.000105404	yes
XLOC_002358	XLOC_002358	TcSYL_0089290	TcX10_chr12:159982-160454	DCT	TM	OK	1013.14	599434	-0.757159	-2.7144	5e-05	0.000105404	yes
XLOC_004702	XLOC_004702	TcSYL_0112650	TcX10_chr18:27948-28513	DCT	TM	OK	172618	795557	-1.11755	-2.71484	5e-05	0.000105404	yes
XLOC_010582	XLOC_010582	TcSYL_0156560	TcX10_chr31:349229-349521	DCT	TM	OK	200579	487645	-2.04027	-2.71636	5e-05	0.000105404	yes
XLOC_018472	XLOC_018472	TcSYL_0057370	TcX10_chr6:1006257-1006564	DCT	TM	OK	338.67	128874	-1.39392	-2.71665	5e-05	0.000105404	yes
XLOC_015725	XLOC_015725	TcSYL_0190980	TcX10_chr42:250446-250969	DCT	TM	OK	410818	520422	-2.98075	-2.71902	5e-05	0.000105404	yes
XLOC_013207	XLOC_013207	TcSYL_0181930	TcX10_chr39:334225-334499	DCT	TM	OK	1890.19	1026.48	-0.880831	-2.73113	5e-05	0.000105404	yes
XLOC_009344	XLOC_009344	TcSYL_0027520	TcX10_chr3:1335489-1335991	DCT	TM	OK	964088	558228	-0.788309	-2.73376	5e-05	0.000105404	yes
XLOC_017197	XLOC_017197	TcSYL_0046970	TcX10_chr5:670005-670441	DCT	TM	OK	360411	179629	-1.00462	-2.73785	5e-05	0.000105404	yes
XLOC_004345	XLOC_004345	TcSYL_0109630	TcX10_chr16:351924-352288	DCT	TM	OK	390187	176511	-1.14441	-2.73795	5e-05	0.000105404	yes
XLOC_005032	XLOC_005032	TcSYL_0115100	TcX10_chr19:244448-245463	DCT	TM	OK	368701	215358	-0.775714	-2.73805	5e-05	0.000105404	yes
XLOC_004798	XLOC_004798	TcSYL_0114230	TcX10_chr18:533152-533681	DCT	TM	OK	157.04	664797	-1.24014	-2.73955	5e-05	0.000105404	yes
XLOC_017344	XLOC_017344	TcSYL_0045170	TcX10_chr5:159846-161449	DCT	TM	OK	126401	701883	-0.848703	-2.74221	5e-05	0.000105404	yes
XLOC_018849	XLOC_018849	TcSYL_0064450	TcX10_chr7:1061110-1061834	DCT	TM	OK	596218	348406	-0.775072	-2.74264	5e-05	0.000105404	yes
XLOC_004465	XLOC_004465	TcSYL_0111760	TcX10_chr16:1185879-1186303	DCT	TM	OK	695353	382433	-0.862539	-2.74657	5e-05	0.000105404	yes
XLOC_002440	XLOC_002440	TcSYL_0090550	TcX10_chr12:355302-355546	DCT	TM	OK	135749	157646	-3.10618	-2.74741	0.0007	0.00128364	yes
XLOC_004025	XLOC_004025	TcSYL_0104860	TcX10_chr15:208651-208919	DCT	TM	OK	334363	977246	-1.77462	-2.74957	5e-05	0.000105404	yes
XLOC_011907	XLOC_011907	TcSYL_0170020	TcX10_chr36:237878-239796	DCT	TM	OK	268091	159075	-0.753016	-2.75312	5e-05	0.000105404	yes
XLOC_001468	XLOC_001468	TcSYL_0080570	TcX10_chr10:235139-235512	DCT	TM	OK	1376.85	790787	-0.80001	-2.76046	5e-05	0.000105404	yes
XLOC_005037	XLOC_005037	TcSYL_0115150	TcX10_chr19:251758-252905	DCT	TM	OK	164177	894624	-0.875895	-2.761	5e-05	0.000105404	yes
XLOC_007408	XLOC_007408	TcSYL_0131480	TcX10_chr23:543164-543963	DCT	TM	OK	421442	242797	-0.79558	-2.76159	5e-05	0.000105404	yes
XLOC_004035	XLOC_004035	TcSYL_0105040	TcX10_chr15:220861-221069	DCT	TM	OK	603108	110121	-2.45333	-2.76241	5e-05	0.000105404	yes
XLOC_000812	XLOC_000812	TcSYL_0000890	TcX10_chr1:350929-351578	DCT	TM	OK	631737	365655	-0.788842	-2.76247	5e-05	0.000105404	yes
XLOC_007360	XLOC_007360	TcSYL_0130850	TcX10_chr23:497445-498298	DCT	TM	OK	800703	34163	-1.22883	-2.76381	5e-05	0.000105404	yes
XLOC_004499	XLOC_004499	TcSYL_0112110	TcX10_chr16:1305343-1305587	DCT	TM	OK	1114.43	498098	-1.16181	-2.76538	5e-05	0.000105404	yes
XLOC_011465	XLOC_011465	TcSYL_0166040	TcX10_chr34:481026-482533	DCT	TM	OK	755264	37652	-1.00426	-2.766	5e-05	0.000105404	yes
XLOC_001637	XLOC_001637	TcSYL_0083100	TcX10_chr10:968913-969199	DCT	TM	OK	595771	258595	-1.20407	-2.76851	5e-05	0.000105404	yes
XLOC_002123	XLOC_002123	TcSYL_0088860	TcX10_chr11:1034906-1035534	DCT	TM	OK	850428	309736	-1.45715	-2.77045	5e-05	0.000105404	yes
XLOC_015806	XLOC_015806	TcSYL_0192670	TcX10_chr42:549425-550314	DCT	TM	OK	200852	296964	-2.75777	-2.77055	5e-05	0.000105404	yes
XLOC_017457	XLOC_017457	TcSYL_0047980	TcX10_chr5:1008878-1010211	DCT	TM	OK	388118	229189	-0.759956	-2.77093	5e-05	0.000105404	yes
XLOC_015271	XLOC_015271	TcSYL_0189370	TcX10_chr41:322122-322375	DCT	TM	OK	555381	199542	-1.47678	-2.77224	5e-05	0.000105404	yes
XLOC_010662	XLOC_010662	TcSYL_0157570	TcX10_chr32:451411-452297	DCT	TM	OK	760477	444047	-0.776193	-2.77783	5e-05	0.000105404	yes
XLOC_000034	XLOC_000034	TcSYL_0000580	TcX10_chr1:185051-185730	DCT	TM	OK	182076	893542	-1.02693	-2.7783	5e-05	0.000105404	yes
XLOC_011713	XLOC_011713	TcSYL_0166960	TcX10_chr35:258191-259191	DCT	TM	OK	252344	141536	-0.834226	-2.78019	5e-05	0.000105404	yes
XLOC_012354	XLOC_012354	TcSYL_0173320	TcX10_chr37:233139-233350	DCT	TM	OK	553056	215943	-1.35677	-2.78239	0.0031	0.00512804	yes
XLOC_016594	XLOC_016594	TcSYL_0201470	TcX10_chr44:289499-290340	DCT	TM	OK	360.61	206574	-0.803778	-2.78309	5e-05	0.000105404	yes
XLOC_011508	XLOC_011508	TcSYL_0163930	TcX10_chr34:187031-187698	DCT	TM	OK	394662	873746	-2.17533	-2.78314	5e-05	0.000105404	yes
XLOC_015888	XLOC_015888	TcSYL_0194470	TcX10_chr42:810472-811460	DCT	TM	OK	743959	314047	-1.24424	-2.78369	5e-05	0.000105404	yes
XLOC_001124	XLOC_001124	TcSYL_0007970	TcX10_chr1:1618916-1619607	DCT	TM	OK	997281	590958	-0.754945	-2.7858	5e-05	0.000105404	yes
XLOC_017187	XLOC_017187	TcSYL_0046870	TcX10_chr5:630345-630637	DCT	TM	OK	1229.07	647735	-0.924096	-2.7887	5e-05	0.000105404	yes
XLOC_004709	XLOC_004709	TcSYL_0112730	TcX10_chr18:48847-49469	DCT	TM	OK	204934	987444	-1.05339	-2.79037	5e-05	0.000105404	yes
XLOC_018481	XLOC_018481	TcSYL_0057460	TcX10_chr6:1030745-1031574	DCT	TM	OK	247097	134.23	-0.880368	-2.79312	5e-05	0.000105404	yes
XLOC_012257	XLOC_012257	TcSYL_0174570	TcX10_chr37:408207-408877	DCT	TM	OK	209767	105329	-0.993887	-2.79726	5e-05	0.000105404	yes
XLOC_000322	XLOC_000322	TcSYL_0005570	TcX10_chr1:1379227-1379510	DCT	TM	OK	293.76	867056	-1.76044	-2.80069	5e-05	0.000105404	yes
XLOC_004472	XLOC_004472	TcSYL_0111830	TcX10_chr16:1210414-1211033	DCT	TM	OK	446.91	247794	-0.850844	-2.80658	5e-05	0.000105404	yes
XLOC_001302	XLOC_001302	TcSYL_0010990	TcX10_chr1:2160061-2160494	DCT	TM	OK	299663	136107	-1.1386	-2.80919	5e-05	0.000105404	yes
XLOC_001492	XLOC_001492	TcSYL_0080810	TcX10_chr10:356068-356741	DCT	TM	OK	426913	968894	-2.13953	-2.81263	5e-05	0.000105404	yes
XLOC_004006	XLOC_004006	TcSYL_0104660	TcX10_chr15:183351-183868	DCT	TM	OK	171218	720728	-1.24831	-2.81284	5e-05	0.000105404	yes
XLOC_011606	XLOC_011606	TcSYL_0166790	TcX10_chr35:221094-221347	DCT	TM	OK	398062	165863	-1.263	-2.81693	0.0001	0.000203386	yes
XLOC_000785	XLOC_000785	TcSYL_0000620	TcX10_chr1:198969-200638	DCT	TM	OK	322402	187531	-0.781731	-2.82137	5e-05	0.000105404	yes
XLOC_005843	XLOC_005843	TcSYL_0019270	TcX10_chr2:763735-764207	DCT	TM	OK	570586	307967	-0.889667	-2.8263	5e-05	0.000105404	yes
XLOC_013940	XLOC_013940	TcSYL_0041010	TcX10_chr4:1040560-1040840	DCT	TM	OK	251274	592129	-2.08528	-2.82692	5e-05	0.000105404	yes
XLOC_005715	XLOC_005715	TcSYL_0016630	TcX10_chr2:426969-427189	DCT	TM	OK	843573	251.97	-1.74326	-2.82886	5e-05	0.000105404	yes
XLOC_005179	XLOC_005179	TcSYL_0117310	TcX10_chr19:752423-752736	DCT	TM	OK	251874	799629	-1.6553	-2.82921	5e-05	0.000105404	yes
XLOC_019863	XLOC_019863	TcSYL_0073490	TcX10_chr8:780557-781137	DCT	TM	OK	442608	241794	-0.872254	-2.8307	5e-05	0.000105404	yes
XLOC_001495	XLOC_001495	TcSYL_0080840	TcX10_chr10:361618-362777	DCT	TM	OK	199719	419026	-2.25286	-2.83118	5e-05	0.000105404	yes
XLOC_005069	XLOC_005069	TcSYL_0115980	TcX10_chr19:542288-543150	DCT	TM	OK	324312	180304	-0.846951	-2.83138	5e-05	0.000105404	yes
XLOC_000211	XLOC_000211	TcSYL_0004230	TcX10_chr1:1134004-1134824	DCT	TM	OK	154213	759329	-1.02213	-2.83143	5e-05	0.000105404	yes
XLOC_014751	XLOC_014751	TcSYL_0043620	TcX10_chr4:1328500-1330004	DCT	TM	OK	162376	888351	-0.87014	-2.8381	5e-05	0.000105404	yes
XLOC_017762	XLOC_017762	TcSYL_0054020	TcX10_chr6:691145-691659	DCT	TM	OK	495485	471042	-3.39491	-2.83939	5e-05	0.000105404	yes
XLOC_012275	XLOC_012275	TcSYL_0174750	TcX10_chr37:454080-455167	DCT	TM	OK	305319	172.33	-0.82514	-2.84181	5e-05	0.000105404	yes
XLOC_005884	XLOC_005884	TcSYL_0019680	TcX10_chr2:898398-898849	DCT	TM	OK	197255	798203	-1.30524	-2.84578	5e-05	0.000105404	yes
XLOC_001863	XLOC_001863	TcSYL_0085310	TcX10_chr11:384758-385188	DCT	TM	OK	471733	238209	-0.985744	-2.84835	5e-05	0.000105404	yes
XLOC_012133	XLOC_012133	TcSYL_0172170	TcX10_chr37:142727-143868	DCT	TM	OK	252076	141503	-0.833027	-2.85158	5e-05	0.000105404	yes
XLOC_001797	XLOC_001797	TcSYL_0084310	TcX10_chr11:286067-286392	DCT	TM	OK	398304	164534	-1.27549	-2.85364	5e-05	0.000105404	yes
XLOC_000251	XLOC_000251	TcSYL_0004630	TcX10_chr1:1221004-1221278	DCT	TM	OK	908614	416911	-1.12393	-2.85368	5e-05	0.000105404	yes
XLOC_004731	XLOC_004731	TcSYL_0113450	TcX10_chr18:404250-405028	DCT	TM	OK	333847	182889	-0.868214	-2.85378	5e-05	0.000105404	yes
XLOC_012394	XLOC_012394	TcSYL_0173970	TcX10_chr37:292896-293500	DCT	TM	OK	144512	623338	-1.2131	-2.85499	5e-05	0.000105404	yes
XLOC_013637	XLOC_013637	TcSYL_0035370	TcX10_chr4:394075-394871	DCT	TM	OK	256688	215811	-3.57218	-2.85862	0.00035	0.000666532	yes
XLOC_012935	XLOC_012935	TcSYL_0181720	TcX10_chr39:323481-323830	DCT	TM	OK	1018.06	542708	-0.907579	-2.86217	5e-05	0.000105404	yes
XLOC_008338	XLOC_008338	TcSYL_0140310	TcX10_chr26:405227-405702	DCT	TM	OK	346029	169002	-1.03385	-2.86692	5e-05	0.000105404	yes
XLOC_019355	XLOC_019355	TcSYL_0062290	TcX10_chr7:216150-216718	DCT	TM	OK	601707	129175	-2.21973	-2.87111	5e-05	0.000105404	yes
XLOC_003217	XLOC_003217	TcSYL_0096870	TcX10_chr13:695908-696389	DCT	TM	OK	375568	189.13	-0.989695	-2.87209	5e-05	0.000105404	yes
XLOC_009074	XLOC_009074	TcSYL_0023320	TcX10_chr3:417336-418363	DCT	TM	OK	1032.12	598319	-0.786629	-2.87213	5e-05	0.000105404	yes
XLOC_019859	XLOC_019859	TcSYL_0073450	TcX10_chr8:769386-770410	DCT	TM	OK	222639	120722	-0.883016	-2.8748	5e-05	0.000105404	yes
XLOC_008415	XLOC_008415	TcSYL_0141930	TcX10_chr27:137106-138418	DCT	TM	OK	885229	430422	-1.0403	-2.87653	5e-05	0.000105404	yes
XLOC_005160	XLOC_005160	TcSYL_0117050	TcX10_chr19:730485-730891	DCT	TM	OK	320234	142351	-1.16967	-2.87864	5e-05	0.000105404	yes
XLOC_005654	XLOC_005654	TcSYL_0014760	TcX10_chr2:41920-42572	DCT	TM	OK	247441	123954	-0.997279	-2.87876	5e-05	0.000105404	yes
XLOC_003241	XLOC_003241	TcSYL_0097190	TcX10_chr13:724934-725607	DCT	TM	OK	183212	863911	-1.08456	-2.87995	5e-05	0.000105404	yes
XLOC_008660	XLOC_008660	TcSYL_0146050	TcX10_chr28:375001-376322	DCT	TM	OK	195452	108067	-0.854884	-2.88005	5e-05	0.000105404	yes
XLOC_005876	XLOC_005876	TcSYL_0019600	TcX10_chr2:866828-867777	DCT	TM	OK	293945	162559	-0.854586	-2.88031	5e-05	0.000105404	yes
XLOC_013079	XLOC_013079	TcSYL_0179160	TcX10_chr39:66083-66690	DCT	TM	OK	258031	127428	-1.01786	-2.88097	5e-05	0.000105404	yes
XLOC_018459	XLOC_018459	TcSYL_0057240	TcX10_chr6:982131-982411	DCT	TM	OK	1111.58	545413	-1.02719	-2.88183	5e-05	0.000105404	yes
XLOC_002045	XLOC_002045	TcSYL_0087880	TcX10_chr11:819708-819931	DCT	TM	OK	321403	863153	-1.89669	-2.88275	0.00035	0.000666532	yes
XLOC_003213	XLOC_003213	TcSYL_0096820	TcX10_chr13:693299-693531	DCT	TM	OK	1919.89	871566	-1.13934	-2.8837	5e-05	0.000105404	yes
XLOC_008676	XLOC_008676	TcSYL_0146410	TcX10_chr28:576675-576889	DCT	TM	OK	3948.55	1925.17	-1.03634	-2.88766	5e-05	0.000105404	yes
XLOC_012151	XLOC_012151	TcSYL_0172400	TcX10_chr37:159104-160029	DCT	TM	OK	504.53	289376	-0.801996	-2.88827	5e-05	0.000105404	yes
XLOC_011418	XLOC_011418	TcSYL_0165390	TcX10_chr34:441874-442547	DCT	TM	OK	120225	499348	-1.26762	-2.89048	5e-05	0.000105404	yes
XLOC_010531	XLOC_010531	TcSYL_0155920	TcX10_chr31:27201-27949	DCT	TM	OK	430156	239432	-0.845247	-2.89368	5e-05	0.000105404	yes
XLOC_008918	XLOC_008918	TcSYL_0148010	TcX10_chr29:359820-360595	DCT	TM	OK	412561	956426	-2.10888	-2.89567	5e-05	0.000105404	yes
XLOC_020418	XLOC_020418	TcSYL_0075390	TcX10_chr9:425214-426589	DCT	TM	OK	147717	788807	-0.90509	-2.90039	5e-05	0.000105404	yes
XLOC_005471	XLOC_005471	TcSYL_0019790	TcX10_chr2:932162-933435	DCT	TM	OK	136358	712278	-0.936883	-2.90313	5e-05	0.000105404	yes
XLOC_000464	XLOC_000464	TcSYL_0009520	TcX10_chr1:1939072-1939481	DCT	TM	OK	117914	310728	-1.92401	-2.90915	5e-05	0.000105404	yes
XLOC_010748	XLOC_010748	TcSYL_0159670	TcX10_chr32:785519-787023	DCT	TM	OK	320379	183709	-0.802359	-2.91284	5e-05	0.000105404	yes
XLOC_016762	XLOC_016762	TcSYL_0203260	TcX10_chr46:253141-253679	DCT	TM	OK	136.45	530784	-1.36218	-2.91291	5e-05	0.000105404	yes
XLOC_014590	XLOC_014590	TcSYL_0041370	TcX10_chr4:1112880-1113280	DCT	TM	OK	495341	544162	-3.18631	-2.91895	0.0012	0.00211643	yes
XLOC_000289	XLOC_000289	TcSYL_0005130	TcX10_chr1:1348814-1350396	DCT	TM	OK	61.74	279708	-1.14228	-2.92221	5e-05	0.000105404	yes
XLOC_016775	XLOC_016775	TcSYL_0203390	TcX10_chr46:284903-285144	DCT	TM	OK	315645	528571	-2.57814	-2.92475	5e-05	0.000105404	yes
XLOC_003797	XLOC_003797	TcSYL_0103520	TcX10_chr14:894736-895742	DCT	TM	OK	407964	230.98	-0.820673	-2.92505	5e-05	0.000105404	yes
XLOC_016219	XLOC_016219	TcSYL_0196130	TcX10_chr43:105381-105736	DCT	TM	OK	444.45	197386	-1.171	-2.93068	5e-05	0.000105404	yes
XLOC_002021	XLOC_002021	TcSYL_0087460	TcX10_chr11:794147-795111	DCT	TM	OK	179795	924123	-0.960199	-2.93075	5e-05	0.000105404	yes
XLOC_011726	XLOC_011726	TcSYL_0167090	TcX10_chr35:293494-294353	DCT	TM	OK	113347	506328	-1.1626	-2.93801	5e-05	0.000105404	yes
XLOC_004739	XLOC_004739	TcSYL_0113530	TcX10_chr18:423644-424266	DCT	TM	OK	217262	101996	-1.09093	-2.93843	5e-05	0.000105404	yes
XLOC_001811	XLOC_001811	TcSYL_0084510	TcX10_chr11:311756-312018	DCT	TM	OK	678124	264068	-1.36064	-2.94106	5e-05	0.000105404	yes
XLOC_019911	XLOC_019911	TcSYL_0073970	TcX10_chr8:894781-895469	DCT	TM	OK	185499	872112	-1.08883	-2.94433	5e-05	0.000105404	yes
XLOC_000826	XLOC_000826	TcSYL_0001030	TcX10_chr1:376791-377929	DCT	TM	OK	115838	567752	-1.02877	-2.94566	5e-05	0.000105404	yes
XLOC_019497	XLOC_019497	TcSYL_0065880	TcX10_chr7:1371899-1372200	DCT	TM	OK	654035	710288	-3.20289	-2.94988	0.0032	0.00526928	yes
XLOC_014774	XLOC_014774	TcSYL_0043910	TcX10_chr4:1349007-1349842	DCT	TM	OK	651102	369178	-0.818566	-2.95224	5e-05	0.000105404	yes
XLOC_014360	XLOC_014360	TcSYL_0036790	TcX10_chr4:490804-491360	DCT	TM	OK	353632	355614	-3.31386	-2.95279	0.00055	0.00102321	yes
XLOC_006454	XLOC_006454	TcSYL_0123690	TcX10_chr21:652707-653146	DCT	TM	OK	541495	274006	-0.98274	-2.95532	5e-05	0.000105404	yes
XLOC_011547	XLOC_011547	TcSYL_0165030	TcX10_chr34:412696-412925	DCT	TM	OK	1165.48	424977	-1.45547	-2.95667	5e-05	0.000105404	yes
XLOC_008039	XLOC_008039	TcSYL_0138230	TcX10_chr25:22116-22450	DCT	TM	OK	185445	485769	-1.93265	-2.95679	5e-05	0.000105404	yes
XLOC_007754	XLOC_007754	TcSYL_0137880	TcX10_chr24:631784-632838	DCT	TM	OK	147992	745444	-0.989344	-2.95862	5e-05	0.000105404	yes
XLOC_011083	XLOC_011083	TcSYL_0162250	TcX10_chr33:264342-270295	DCT	TM	OK	177235	848156	-1.06326	-2.95968	5e-05	0.000105404	yes
XLOC_012862	XLOC_012862	TcSYL_0180610	TcX10_chr39:213986-214701	DCT	TM	OK	389555	209751	-0.893145	-2.96906	5e-05	0.000105404	yes
XLOC_003192	XLOC_003192	TcSYL_0096540	TcX10_chr13:676140-676348	DCT	TM	OK	822213	174.73	-2.23439	-2.96965	5e-05	0.000105404	yes
XLOC_001805	XLOC_001805	TcSYL_0084440	TcX10_chr11:307627-308066	DCT	TM	OK	575.68	294035	-0.969277	-2.96976	5e-05	0.000105404	yes
XLOC_003159	XLOC_003159	TcSYL_0096020	TcX10_chr13:640110-640381	DCT	TM	OK	537898	190784	-1.49539	-2.97249	5e-05	0.000105404	yes
XLOC_002977	XLOC_002977	TcSYL_0092490	TcX10_chr13:11701-11987	DCT	TM	OK	247306	546969	-2.17677	-2.97431	5e-05	0.000105404	yes
XLOC_009663	XLOC_009663	TcSYL_0027140	TcX10_chr3:1136437-1136999	DCT	TM	OK	244452	113351	-1.10875	-2.97481	5e-05	0.000105404	yes
XLOC_019897	XLOC_019897	TcSYL_0073830	TcX10_chr8:865685-865959	DCT	TM	OK	1041.45	480.68	-1.11544	-2.97558	5e-05	0.000105404	yes
XLOC_010965	XLOC_010965	TcSYL_0160380	TcX10_chr33:67933-72695	DCT	TM	OK	460566	0.866452	-2.41022	-2.98091	5e-05	0.000105404	yes
XLOC_008355	XLOC_008355	TcSYL_0140490	TcX10_chr26:444225-444469	DCT	TM	OK	764735	265592	-1.52575	-2.98144	5e-05	0.000105404	yes
XLOC_011700	XLOC_011700	TcSYL_0166820	TcX10_chr35:222145-222398	DCT	TM	OK	1432.92	672861	-1.09057	-2.98324	5e-05	0.000105404	yes
XLOC_011277	XLOC_011277	TcSYL_0163140	TcX10_chr33:320725-321314	DCT	TM	OK	202288	901494	-1.16602	-2.98375	5e-05	0.000105404	yes
XLOC_001359	XLOC_001359	TcSYL_0011910	TcX10_chr1:2395414-2395820	DCT	TM	OK	567305	270688	-4.38942	-2.98406	0.00565	0.0088878	yes
XLOC_012276	XLOC_012276	TcSYL_0174760	TcX10_chr37:455192-458118	DCT	TM	OK	302901	170.66	-0.827726	-2.98667	5e-05	0.000105404	yes
XLOC_012563	XLOC_012563	TcSYL_0176870	TcX10_chr38:258421-258845	DCT	TM	OK	260048	107622	-1.27281	-2.9877	5e-05	0.000105404	yes
XLOC_013508	XLOC_013508	TcSYL_0033060	TcX10_chr4:239017-239396	DCT	TM	OK	743636	471907	-3.97802	-2.98788	0.0009	0.00161633	yes
XLOC_000811	XLOC_000811	TcSYL_0000880	TcX10_chr1:350078-350829	DCT	TM	OK	730.35	411125	-0.829009	-2.98966	5e-05	0.000105404	yes
XLOC_000911	XLOC_000911	TcSYL_0002960	TcX10_chr1:871577-872580	DCT	TM	OK	179169	912406	-0.97357	-2.99283	5e-05	0.000105404	yes
XLOC_010613	XLOC_010613	TcSYL_0156930	TcX10_chr31:442147-442394	DCT	TM	OK	1042.95	437023	-1.25489	-2.99516	5e-05	0.000105404	yes
XLOC_002028	XLOC_002028	TcSYL_0087560	TcX10_chr11:800413-800723	DCT	TM	OK	1329.31	692485	-0.940822	-2.99596	5e-05	0.000105404	yes
XLOC_008276	XLOC_008276	TcSYL_0139610	TcX10_chr26:242116-242711	DCT	TM	OK	253092	121672	-1.05667	-2.99627	5e-05	0.000105404	yes
XLOC_012847	XLOC_012847	TcSYL_0180340	TcX10_chr39:194031-194287	DCT	TM	OK	386731	101942	-1.92358	-2.99969	5e-05	0.000105404	yes
XLOC_008672	XLOC_008672	TcSYL_0146370	TcX10_chr28:561044-561564	DCT	TM	OK	658.18	353973	-0.894842	-2.99984	5e-05	0.000105404	yes
XLOC_012370	XLOC_012370	TcSYL_0173520	TcX10_chr37:245955-246580	DCT	TM	OK	124206	490827	-1.33945	-3.00117	5e-05	0.000105404	yes
XLOC_012286	XLOC_012286	TcSYL_0174860	TcX10_chr37:489850-490724	DCT	TM	OK	385989	955843	-2.01371	-3.00266	5e-05	0.000105404	yes
XLOC_004653	XLOC_004653	TcSYL_0110790	TcX10_chr16:826870-827372	DCT	TM	OK	481981	248156	-0.957728	-3.00352	5e-05	0.000105404	yes
XLOC_005043	XLOC_005043	TcSYL_0115220	TcX10_chr19:276838-277481	DCT	TM	OK	429485	228034	-0.913358	-3.00716	5e-05	0.000105404	yes
XLOC_017121	XLOC_017121	TcSYL_0046100	TcX10_chr5:429750-430096	DCT	TM	OK	266.69	955105	-1.48143	-3.01116	5e-05	0.000105404	yes
XLOC_002405	XLOC_002405	TcSYL_0089920	TcX10_chr12:309563-309795	DCT	TM	OK	1332.57	525115	-1.34351	-3.01191	5e-05	0.000105404	yes
XLOC_008156	XLOC_008156	TcSYL_0139380	TcX10_chr26:108436-109058	DCT	TM	OK	312094	155962	-1.00079	-3.01694	5e-05	0.000105404	yes
XLOC_002644	XLOC_002644	TcSYL_0091200	TcX10_chr12:411429-412327	DCT	TM	OK	863168	338875	-1.34889	-3.02196	5e-05	0.000105404	yes
XLOC_008157	XLOC_008157	TcSYL_0139390	TcX10_chr26:109331-109998	DCT	TM	OK	320023	163719	-0.966953	-3.0235	5e-05	0.000105404	yes
XLOC_000286	XLOC_000286	TcSYL_0005100	TcX10_chr1:1347485-1347810	DCT	TM	OK	578581	251005	-1.20481	-3.02652	5e-05	0.000105404	yes
XLOC_017484	XLOC_017484	TcSYL_0048250	TcX10_chr5:1096720-1097045	DCT	TM	OK	631042	281337	-1.16543	-3.02835	5e-05	0.000105404	yes
XLOC_009358	XLOC_009358	TcSYL_0027680	TcX10_chr3:1388884-1389920	DCT	TM	OK	1694.99	925908	-0.872336	-3.02838	5e-05	0.000105404	yes
XLOC_005466	XLOC_005466	TcSYL_0019740	TcX10_chr2:924809-925911	DCT	TM	OK	197205	102864	-0.938964	-3.03457	5e-05	0.000105404	yes
XLOC_001942	XLOC_001942	TcSYL_0086410	TcX10_chr11:547455-547900	DCT	TM	OK	355027	161939	-1.13248	-3.04459	5e-05	0.000105404	yes
XLOC_017586	XLOC_017586	TcSYL_0050140	TcX10_chr6:91577-92148	DCT	TM	OK	1190.8	668152	-0.833679	-3.04738	5e-05	0.000105404	yes
XLOC_014777	XLOC_014777	TcSYL_0043940	TcX10_chr4:1352781-1353220	DCT	TM	OK	690369	355336	-0.958184	-3.04877	5e-05	0.000105404	yes
XLOC_017495	XLOC_017495	TcSYL_0048420	TcX10_chr5:1108192-1108520	DCT	TM	OK	630069	278335	-1.17869	-3.05397	5e-05	0.000105404	yes
XLOC_014762	XLOC_014762	TcSYL_0043760	TcX10_chr4:1340371-1341092	DCT	TM	OK	930489	521304	-0.835865	-3.06208	5e-05	0.000105404	yes
XLOC_012277	XLOC_012277	TcSYL_0174770	TcX10_chr37:462815-463185	DCT	TM	OK	277122	103.55	-1.42019	-3.06801	5e-05	0.000105404	yes
XLOC_012420	XLOC_012420	TcSYL_0174310	TcX10_chr37:320215-320579	DCT	TM	OK	496.91	221025	-1.16877	-3.07156	5e-05	0.000105404	yes
XLOC_008072	XLOC_008072	TcSYL_0138570	TcX10_chr25:155143-155729	DCT	TM	OK	436642	223136	-0.968524	-3.07182	5e-05	0.000105404	yes
XLOC_015203	XLOC_015203	TcSYL_0188470	TcX10_chr41:255156-255502	DCT	TM	OK	270421	912796	-1.56684	-3.07456	5e-05	0.000105404	yes
XLOC_003784	XLOC_003784	TcSYL_0103320	TcX10_chr14:866158-866588	DCT	TM	OK	8869.49	4726.68	-0.908025	-3.07677	5e-05	0.000105404	yes
XLOC_003315	XLOC_003315	TcSYL_0098130	TcX10_chr13:786738-787051	DCT	TM	OK	414236	151277	-1.45326	-3.0798	5e-05	0.000105404	yes
XLOC_002472	XLOC_002472	TcSYL_0091070	TcX10_chr12:404390-404727	DCT	TM	OK	334749	121867	-1.45777	-3.08021	5e-05	0.000105404	yes
XLOC_018437	XLOC_018437	TcSYL_0056920	TcX10_chr6:866080-868520	DCT	TM	OK	829837	429826	-0.949076	-3.08088	5e-05	0.000105404	yes
XLOC_014968	XLOC_014968	TcSYL_0186690	TcX10_chr40:424527-426004	DCT	TM	OK	938354	452642	-1.05176	-3.08532	5e-05	0.000105404	yes
XLOC_012006	XLOC_012006	TcSYL_0171150	TcX10_chr36:487070-488481	DCT	TM	OK	210743	113.09	-0.89801	-3.08621	5e-05	0.000105404	yes
XLOC_012668	XLOC_012668	TcSYL_0178380	TcX10_chr38:484286-484899	DCT	TM	OK	375064	192256	-0.964112	-3.08905	5e-05	0.000105404	yes
XLOC_018454	XLOC_018454	TcSYL_0057190	TcX10_chr6:971681-972534	DCT	TM	OK	283373	148718	-0.930119	-3.09073	5e-05	0.000105404	yes
XLOC_012349	XLOC_012349	TcSYL_0173270	TcX10_chr37:227467-229961	DCT	TM	OK	233676	129769	-0.848566	-3.09184	5e-05	0.000105404	yes
XLOC_001960	XLOC_001960	TcSYL_0086600	TcX10_chr11:604514-605337	DCT	TM	OK	611053	337359	-0.857012	-3.09196	5e-05	0.000105404	yes
XLOC_017028	XLOC_017028	TcSYL_0205860	TcX10_chr47:243166-243824	DCT	TM	OK	63347	157944	-2.00387	-3.0937	5e-05	0.000105404	yes
XLOC_004748	XLOC_004748	TcSYL_0113630	TcX10_chr18:458298-458542	DCT	TM	OK	955383	346482	-1.4633	-3.09568	5e-05	0.000105404	yes
XLOC_004908	XLOC_004908	TcSYL_0113680	TcX10_chr18:461688-462049	DCT	TM	OK	106613	11556	-3.20567	-3.09782	5e-05	0.000105404	yes
XLOC_013073	XLOC_013073	TcSYL_0179090	TcX10_chr39:47943-48967	DCT	TM	OK	468464	257387	-0.863999	-3.09977	5e-05	0.000105404	yes
XLOC_014946	XLOC_014946	TcSYL_0186380	TcX10_chr40:403554-403828	DCT	TM	OK	342619	80378	-2.09173	-3.10055	5e-05	0.000105404	yes
XLOC_008087	XLOC_008087	TcSYL_0138720	TcX10_chr25:199333-199721	DCT	TM	OK	363462	152884	-1.24937	-3.1061	5e-05	0.000105404	yes
XLOC_001875	XLOC_001875	TcSYL_0085460	TcX10_chr11:395672-395928	DCT	TM	OK	444682	177492	-1.32502	-3.10733	0.0001	0.000203386	yes
XLOC_007747	XLOC_007747	TcSYL_0137760	TcX10_chr24:615958-616742	DCT	TM	OK	947635	365223	-1.37556	-3.10999	5e-05	0.000105404	yes
XLOC_005369	XLOC_005369	TcSYL_0017240	TcX10_chr2:470723-470940	DCT	TM	OK	2580.11	1122.74	-1.20041	-3.1144	5e-05	0.000105404	yes
XLOC_011715	XLOC_011715	TcSYL_0166980	TcX10_chr35:263604-264544	DCT	TM	OK	283939	148013	-0.939858	-3.11471	5e-05	0.000105404	yes
XLOC_003542	XLOC_003542	TcSYL_0103080	TcX10_chr14:853630-853988	DCT	TM	OK	1419.01	751595	-0.916862	-3.1163	5e-05	0.000105404	yes
XLOC_019350	XLOC_019350	TcSYL_0061980	TcX10_chr7:149599-150542	DCT	TM	OK	346629	711561	-2.28433	-3.11712	5e-05	0.000105404	yes
XLOC_010534	XLOC_010534	TcSYL_0155950	TcX10_chr31:37718-38319	DCT	TM	OK	262731	122206	-1.10427	-3.12195	5e-05	0.000105404	yes
XLOC_014033	XLOC_014033	TcSYL_0044200	TcX10_chr4:1428435-1428964	DCT	TM	OK	676393	355022	-0.929951	-3.127	5e-05	0.000105404	yes
XLOC_001425	XLOC_001425	TcSYL_0013630	TcX10_chr1:2740496-2741331	DCT	TM	OK	517	280.13	-0.884067	-3.13026	5e-05	0.000105404	yes
XLOC_020366	XLOC_020366	TcSYL_0074870	TcX10_chr9:184159-184730	DCT	TM	OK	5143.67	2724.15	-0.916993	-3.13139	5e-05	0.000105404	yes
XLOC_008328	XLOC_008328	TcSYL_0140190	TcX10_chr26:395239-395528	DCT	TM	OK	1018.92	449785	-1.17973	-3.13421	5e-05	0.000105404	yes
XLOC_002229	XLOC_002229	TcSYL_0085060	TcX10_chr11:370240-370544	DCT	TM	OK	855.15	382976	-1.15892	-3.13615	5e-05	0.000105404	yes
XLOC_017497	XLOC_017497	TcSYL_0048440	TcX10_chr5:1109179-1109855	DCT	TM	OK	224.28	104323	-1.10425	-3.14223	5e-05	0.000105404	yes
XLOC_012321	XLOC_012321	TcSYL_0172520	TcX10_chr37:166289-166491	DCT	TM	OK	1259.86	291744	-2.11049	-3.14682	5e-05	0.000105404	yes
XLOC_014788	XLOC_014788	TcSYL_0044050	TcX10_chr4:1374792-1375702	DCT	TM	OK	466041	250029	-0.898363	-3.14794	5e-05	0.000105404	yes
XLOC_019299	XLOC_019299	TcSYL_0061080	TcX10_chr7:90053-91206	DCT	TM	OK	191207	965645	-0.985568	-3.15198	5e-05	0.000105404	yes
XLOC_005114	XLOC_005114	TcSYL_0116430	TcX10_chr19:685018-685439	DCT	TM	OK	907187	471.24	-0.944938	-3.16198	5e-05	0.000105404	yes
XLOC_008090	XLOC_008090	TcSYL_0138750	TcX10_chr25:204164-205257	DCT	TM	OK	185799	925062	-1.00612	-3.16317	5e-05	0.000105404	yes
XLOC_014679	XLOC_014679	TcSYL_0042700	TcX10_chr4:1240838-1241328	DCT	TM	OK	202.76	777991	-1.38195	-3.16708	5e-05	0.000105404	yes
XLOC_013491	XLOC_013491	TcSYL_0032760	TcX10_chr4:221693-222072	DCT	TM	OK	814286	595563	-3.77321	-3.16969	0.00015	0.000298501	yes
XLOC_010548	XLOC_010548	TcSYL_0156090	TcX10_chr31:131901-133378	DCT	TM	OK	328932	179314	-0.875299	-3.17035	5e-05	0.000105404	yes
XLOC_015515	XLOC_015515	TcSYL_0191340	TcX10_chr42:283423-283901	DCT	TM	OK	714026	992069	-2.84746	-3.171	5e-05	0.000105404	yes
XLOC_017593	XLOC_017593	TcSYL_0050210	TcX10_chr6:114942-115210	DCT	TM	OK	730099	275.84	-1.40426	-3.17117	5e-05	0.000105404	yes
XLOC_001985	XLOC_001985	TcSYL_0086950	TcX10_chr11:755852-756606	DCT	TM	OK	108834	418317	-1.37946	-3.18109	5e-05	0.000105404	yes
XLOC_017636	XLOC_017636	TcSYL_0050740	TcX10_chr6:202261-203420	DCT	TM	OK	158706	768463	-1.04631	-3.18125	5e-05	0.000105404	yes
XLOC_019899	XLOC_019899	TcSYL_0073850	TcX10_chr8:868118-869238	DCT	TM	OK	177167	88965	-0.993797	-3.18187	5e-05	0.000105404	yes
XLOC_012826	XLOC_012826	TcSYL_0180020	TcX10_chr39:155376-156214	DCT	TM	OK	225438	110206	-1.03253	-3.18202	5e-05	0.000105404	yes
XLOC_006401	XLOC_006401	TcSYL_0123070	TcX10_chr21:516672-517162	DCT	TM	OK	599933	302611	-0.987338	-3.18243	5e-05	0.000105404	yes
XLOC_008666	XLOC_008666	TcSYL_0146130	TcX10_chr28:411419-412452	DCT	TM	OK	478519	259634	-0.882097	-3.18839	5e-05	0.000105404	yes
XLOC_004520	XLOC_004520	TcSYL_0112320	TcX10_chr16:1356754-1357292	DCT	TM	OK	1369.06	745074	-0.877726	-3.18878	5e-05	0.000105404	yes
XLOC_013129	XLOC_013129	TcSYL_0179830	TcX10_chr39:136069-136826	DCT	TM	OK	338947	171873	-0.979712	-3.19111	5e-05	0.000105404	yes
XLOC_004459	XLOC_004459	TcSYL_0111700	TcX10_chr16:1167226-1168643	DCT	TM	OK	157282	796689	-0.981263	-3.19116	5e-05	0.000105404	yes
XLOC_005318	XLOC_005318	TcSYL_0016360	TcX10_chr2:411340-412460	DCT	TM	OK	192164	188239	-3.3517	-3.19412	0.0004	0.000757937	yes
XLOC_017365	XLOC_017365	TcSYL_0045380	TcX10_chr5:244587-245455	DCT	TM	OK	655215	211356	-1.63229	-3.19425	5e-05	0.000105404	yes
XLOC_011904	XLOC_011904	TcSYL_0169990	TcX10_chr36:226967-228480	DCT	TM	OK	1159.16	616598	-0.910671	-3.19547	5e-05	0.000105404	yes
XLOC_009221	XLOC_009221	TcSYL_0025660	TcX10_chr3:979929-980284	DCT	TM	OK	645338	296155	-1.1237	-3.20102	5e-05	0.000105404	yes
XLOC_012422	XLOC_012422	TcSYL_0174330	TcX10_chr37:321689-323772	DCT	TM	OK	195757	107025	-0.871117	-3.20109	5e-05	0.000105404	yes
XLOC_001800	XLOC_001800	TcSYL_0084340	TcX10_chr11:294617-295317	DCT	TM	OK	306.32	147693	-1.05244	-3.20166	5e-05	0.000105404	yes
XLOC_000495	XLOC_000495	TcSYL_0009890	TcX10_chr1:1964069-1965225	DCT	TM	OK	161298	787287	-1.03476	-3.20181	5e-05	0.000105404	yes
XLOC_014070	XLOC_014070	TcSYL_0044640	TcX10_chr4:1483191-1483495	DCT	TM	OK	779512	338604	-1.20297	-3.20455	5e-05	0.000105404	yes
XLOC_009085	XLOC_009085	TcSYL_0023430	TcX10_chr3:566488-566729	DCT	TM	OK	905536	305	-1.56997	-3.21029	5e-05	0.000105404	yes
XLOC_001413	XLOC_001413	TcSYL_0012950	TcX10_chr1:2467849-2468510	DCT	TM	OK	1998.26	1087.6	-0.877593	-3.21267	5e-05	0.000105404	yes
XLOC_019860	XLOC_019860	TcSYL_0073460	TcX10_chr8:770724-771229	DCT	TM	OK	435897	208708	-1.0625	-3.21544	5e-05	0.000105404	yes
XLOC_008408	XLOC_008408	TcSYL_0141860	TcX10_chr27:110422-112079	DCT	TM	OK	355612	193122	-0.88079	-3.21772	5e-05	0.000105404	yes
XLOC_001739	XLOC_001739	TcSYL_0082560	TcX10_chr10:763870-764243	DCT	TM	OK	1202.99	615881	-0.965897	-3.22085	5e-05	0.000105404	yes
XLOC_018483	XLOC_018483	TcSYL_0057480	TcX10_chr6:1033020-1033645	DCT	TM	OK	185562	762452	-1.28318	-3.22603	5e-05	0.000105404	yes
XLOC_009082	XLOC_009082	TcSYL_0023400	TcX10_chr3:553502-553836	DCT	TM	OK	620.29	267647	-1.21261	-3.23009	5e-05	0.000105404	yes
XLOC_004847	XLOC_004847	TcSYL_0114870	TcX10_chr18:701806-702761	DCT	TM	OK	225801	110745	-1.02781	-3.23099	5e-05	0.000105404	yes
XLOC_016555	XLOC_016555	TcSYL_0200720	TcX10_chr44:103555-104027	DCT	TM	OK	170095	575064	-1.56454	-3.23227	5e-05	0.000105404	yes
XLOC_015278	XLOC_015278	TcSYL_0189490	TcX10_chr41:328685-329061	DCT	TM	OK	411563	167069	-1.30067	-3.23312	5e-05	0.000105404	yes
XLOC_008310	XLOC_008310	TcSYL_0140000	TcX10_chr26:344892-345796	DCT	TM	OK	273254	137968	-0.985911	-3.23431	5e-05	0.000105404	yes
XLOC_020248	XLOC_020248	TcSYL_0078970	TcX10_chr9:928701-928987	DCT	TM	OK	1127.76	505373	-1.15804	-3.23944	5e-05	0.000105404	yes
XLOC_015171	XLOC_015171	TcSYL_0188000	TcX10_chr41:216475-217403	DCT	TM	OK	781691	427205	-0.871668	-3.244	5e-05	0.000105404	yes
XLOC_006509	XLOC_006509	TcSYL_0121950	TcX10_chr21:274881-275188	DCT	TM	OK	411602	134124	-1.61768	-3.25217	5e-05	0.000105404	yes
XLOC_017517	XLOC_017517	TcSYL_0048680	TcX10_chr5:1157356-1157855	DCT	TM	OK	7448.5	3812.59	-0.966178	-3.25246	5e-05	0.000105404	yes
XLOC_008966	XLOC_008966	TcSYL_0146800	TcX10_chr29:86088-86374	DCT	TM	OK	190756	314461	-2.60078	-3.25315	5e-05	0.000105404	yes
XLOC_015188	XLOC_015188	TcSYL_0188280	TcX10_chr41:241413-242071	DCT	TM	OK	166448	679127	-1.29332	-3.25494	5e-05	0.000105404	yes
XLOC_008081	XLOC_008081	TcSYL_0138660	TcX10_chr25:189067-189710	DCT	TM	OK	409587	204131	-1.00468	-3.25572	5e-05	0.000105404	yes
XLOC_002773	XLOC_002773	TcSYL_0094690	TcX10_chr13:435315-435877	DCT	TM	OK	139454	491761	-1.50376	-3.2562	5e-05	0.000105404	yes
XLOC_012397	XLOC_012397	TcSYL_0174000	TcX10_chr37:298629-299488	DCT	TM	OK	189116	874309	-1.11306	-3.25894	5e-05	0.000105404	yes
XLOC_004460	XLOC_004460	TcSYL_0111710	TcX10_chr16:1169861-1170201	DCT	TM	OK	286157	890752	-1.68371	-3.2594	5e-05	0.000105404	yes
XLOC_001880	XLOC_001880	TcSYL_0085510	TcX10_chr11:403523-403932	DCT	TM	OK	157938	42914	-1.87984	-3.25954	5e-05	0.000105404	yes
XLOC_008863	XLOC_008863	TcSYL_0146330	TcX10_chr28:539063-539424	DCT	TM	OK	391816	151952	-1.36656	-3.26246	5e-05	0.000105404	yes
XLOC_016473	XLOC_016473	TcSYL_0200850	TcX10_chr44:165814-166604	DCT	TM	OK	317711	156876	-1.0181	-3.26406	5e-05	0.000105404	yes
XLOC_011836	XLOC_011836	TcSYL_0169010	TcX10_chr36:120486-121501	DCT	TM	OK	137853	619067	-1.15497	-3.26596	5e-05	0.000105404	yes
XLOC_000163	XLOC_000163	TcSYL_0003610	TcX10_chr1:1043717-1044231	DCT	TM	OK	901536	20295	-2.15126	-3.26598	5e-05	0.000105404	yes
XLOC_000990	XLOC_000990	TcSYL_0005480	TcX10_chr1:1374709-1375058	DCT	TM	OK	529.6	219983	-1.26751	-3.26702	5e-05	0.000105404	yes
XLOC_010696	XLOC_010696	TcSYL_0158310	TcX10_chr32:496418-496719	DCT	TM	OK	926.65	402589	-1.20271	-3.26822	5e-05	0.000105404	yes
XLOC_019895	XLOC_019895	TcSYL_0073810	TcX10_chr8:863270-864450	DCT	TM	OK	452418	242213	-0.901376	-3.27183	5e-05	0.000105404	yes
XLOC_006399	XLOC_006399	TcSYL_0123050	TcX10_chr21:507897-508228	DCT	TM	OK	841678	381343	-1.14218	-3.2754	5e-05	0.000105404	yes
XLOC_000702	XLOC_000702	TcSYL_0014070	TcX10_chr1:2940792-2941036	DCT	TM	OK	713934	214843	-1.73251	-3.27772	5e-05	0.000105404	yes
XLOC_017477	XLOC_017477	TcSYL_0048180	TcX10_chr5:1089280-1089758	DCT	TM	OK	278795	114341	-1.28586	-3.28395	5e-05	0.000105404	yes
XLOC_010896	XLOC_010896	TcSYL_0158810	TcX10_chr32:528169-529268	DCT	TM	OK	349019	0.723989	-5.5912	-3.2841	0.00825	0.0126542	yes
XLOC_018465	XLOC_018465	TcSYL_0057300	TcX10_chr6:993629-994842	DCT	TM	OK	1244.38	657.74	-0.919837	-3.29148	5e-05	0.000105404	yes
XLOC_004638	XLOC_004638	TcSYL_0110640	TcX10_chr16:682348-683003	DCT	TM	OK	206218	884321	-1.22153	-3.29205	5e-05	0.000105404	yes
XLOC_011922	XLOC_011922	TcSYL_0170200	TcX10_chr36:266690-267465	DCT	TM	OK	163728	665164	-1.29952	-3.29949	5e-05	0.000105404	yes
XLOC_009312	XLOC_009312	TcSYL_0026890	TcX10_chr3:1066185-1066426	DCT	TM	OK	843031	259985	-1.69715	-3.30121	5e-05	0.000105404	yes
XLOC_003170	XLOC_003170	TcSYL_0096210	TcX10_chr13:653414-654258	DCT	TM	OK	301142	148204	-1.02286	-3.30773	5e-05	0.000105404	yes
XLOC_016707	XLOC_016707	TcSYL_0202360	TcX10_chr45:201066-201694	DCT	TM	OK	545916	277524	-0.976068	-3.30843	5e-05	0.000105404	yes
XLOC_003298	XLOC_003298	TcSYL_0097930	TcX10_chr13:774971-775473	DCT	TM	OK	564333	274735	-1.03851	-3.31026	5e-05	0.000105404	yes
XLOC_004945	XLOC_004945	TcSYL_0115420	TcX10_chr19:344918-346905	DCT	TM	OK	163016	849341	-0.940598	-3.31066	5e-05	0.000105404	yes
XLOC_002551	XLOC_002551	TcSYL_0092340	TcX10_chr12:992163-992860	DCT	TM	OK	190398	807597	-1.23731	-3.31129	5e-05	0.000105404	yes
XLOC_011974	XLOC_011974	TcSYL_0170760	TcX10_chr36:428581-428876	DCT	TM	OK	506338	177495	-1.51232	-3.31209	5e-05	0.000105404	yes
XLOC_010549	XLOC_010549	TcSYL_0156100	TcX10_chr31:137347-138407	DCT	TM	OK	183967	878366	-1.06655	-3.31363	5e-05	0.000105404	yes
XLOC_002407	XLOC_002407	TcSYL_0089960	TcX10_chr12:311307-311908	DCT	TM	OK	438133	216265	-1.01857	-3.31439	5e-05	0.000105404	yes
XLOC_012392	XLOC_012392	TcSYL_0173940	TcX10_chr37:291497-292128	DCT	TM	OK	534063	159467	-5.06568	-3.31566	0.0032	0.00526928	yes
XLOC_004517	XLOC_004517	TcSYL_0112290	TcX10_chr16:1348929-1349539	DCT	TM	OK	383857	183777	-1.06262	-3.31642	5e-05	0.000105404	yes
XLOC_002337	XLOC_002337	TcSYL_0089080	TcX10_chr12:101616-102667	DCT	TM	OK	597696	316406	-0.917636	-3.3165	5e-05	0.000105404	yes
XLOC_014068	XLOC_014068	TcSYL_0044620	TcX10_chr4:1481610-1482196	DCT	TM	OK	470153	231617	-1.02139	-3.31672	5e-05	0.000105404	yes
XLOC_013409	XLOC_013409	TcSYL_0031490	TcX10_chr4:134451-134692	DCT	TM	OK	777061	238706	-1.70279	-3.31793	5e-05	0.000105404	yes
XLOC_005070	XLOC_005070	TcSYL_0115990	TcX10_chr19:543432-543724	DCT	TM	OK	866394	357974	-1.27517	-3.31858	5e-05	0.000105404	yes
XLOC_004758	XLOC_004758	TcSYL_0113770	TcX10_chr18:467887-468086	DCT	TM	OK	816307	284286	-1.52177	-3.31863	0.00185	0.00317191	yes
XLOC_001274	XLOC_001274	TcSYL_0010710	TcX10_chr1:2054851-2055392	DCT	TM	OK	947181	491555	-0.946289	-3.32188	5e-05	0.000105404	yes
XLOC_000093	XLOC_000093	TcSYL_0001910	TcX10_chr1:756637-756905	DCT	TM	OK	358518	70.41	-2.34819	-3.32289	5e-05	0.000105404	yes
XLOC_005883	XLOC_005883	TcSYL_0019670	TcX10_chr2:895647-896371	DCT	TM	OK	263948	123206	-1.09918	-3.32348	5e-05	0.000105404	yes
XLOC_002550	XLOC_002550	TcSYL_0092330	TcX10_chr12:986645-987108	DCT	TM	OK	280708	111762	-1.32865	-3.32685	5e-05	0.000105404	yes
XLOC_004703	XLOC_004703	TcSYL_0112670	TcX10_chr18:32470-32882	DCT	TM	OK	202939	633583	-1.67944	-3.33162	5e-05	0.000105404	yes
XLOC_000657	XLOC_000657	TcSYL_0013150	TcX10_chr1:2481026-2481309	DCT	TM	OK	720.53	267.73	-1.42828	-3.33447	5e-05	0.000105404	yes
XLOC_005158	XLOC_005158	TcSYL_0117020	TcX10_chr19:729161-729402	DCT	TM	OK	1074.83	373841	-1.5236	-3.3364	5e-05	0.000105404	yes
XLOC_005658	XLOC_005658	TcSYL_0014800	TcX10_chr2:79690-82529	DCT	TM	OK	533.58	275706	-0.952571	-3.34127	5e-05	0.000105404	yes
XLOC_010708	XLOC_010708	TcSYL_0158580	TcX10_chr32:513916-514190	DCT	TM	OK	647467	221.15	-1.54978	-3.34367	5e-05	0.000105404	yes
XLOC_001859	XLOC_001859	TcSYL_0085260	TcX10_chr11:382339-382841	DCT	TM	OK	472111	220657	-1.09732	-3.34605	5e-05	0.000105404	yes
XLOC_003546	XLOC_003546	TcSYL_0103180	TcX10_chr14:857774-857979	DCT	TM	OK	629613	181133	-1.79741	-3.35039	0.00035	0.000666532	yes
XLOC_002668	XLOC_002668	TcSYL_0091950	TcX10_chr12:882862-883070	DCT	TM	OK	870113	156011	-2.47956	-3.3526	5e-05	0.000105404	yes
XLOC_001494	XLOC_001494	TcSYL_0080830	TcX10_chr10:359192-360648	DCT	TM	OK	302031	761081	-1.98857	-3.35428	5e-05	0.000105404	yes
XLOC_004592	XLOC_004592	TcSYL_0109430	TcX10_chr16:230014-230864	DCT	TM	OK	102255	380816	-1.42501	-3.37156	5e-05	0.000105404	yes
XLOC_017499	XLOC_017499	TcSYL_0048490	TcX10_chr5:1112291-1112943	DCT	TM	OK	469452	230871	-1.02389	-3.37177	5e-05	0.000105404	yes
XLOC_004704	XLOC_004704	TcSYL_0112680	TcX10_chr18:34627-35015	DCT	TM	OK	441269	180608	-1.2888	-3.37283	5e-05	0.000105404	yes
XLOC_016879	XLOC_016879	TcSYL_0203560	TcX10_chr46:321748-322727	DCT	TM	OK	46972	115812	-2.02001	-3.37482	5e-05	0.000105404	yes
XLOC_000805	XLOC_000805	TcSYL_0000820	TcX10_chr1:327200-327573	DCT	TM	OK	642814	288477	-1.15594	-3.37934	5e-05	0.000105404	yes
XLOC_005677	XLOC_005677	TcSYL_0015730	TcX10_chr2:370860-371359	DCT	TM	OK	326111	136673	-1.25464	-3.37948	5e-05	0.000105404	yes
XLOC_016770	XLOC_016770	TcSYL_0203340	TcX10_chr46:272616-273280	DCT	TM	OK	218432	931141	-1.23011	-3.38821	5e-05	0.000105404	yes
XLOC_000255	XLOC_000255	TcSYL_0004670	TcX10_chr1:1229618-1230852	DCT	TM	OK	425333	222165	-0.936963	-3.3889	5e-05	0.000105404	yes
XLOC_000913	XLOC_000913	TcSYL_0002980	TcX10_chr1:873166-873707	DCT	TM	OK	156.12	525406	-1.57115	-3.39041	5e-05	0.000105404	yes
XLOC_000031	XLOC_000031	TcSYL_0000550	TcX10_chr1:171223-171512	DCT	TM	OK	435372	127073	-1.77659	-3.392	5e-05	0.000105404	yes
XLOC_011758	XLOC_011758	TcSYL_0167470	TcX10_chr35:404981-405183	DCT	TM	OK	957767	123698	-2.95285	-3.39447	5e-05	0.000105404	yes
XLOC_008185	XLOC_008185	TcSYL_0140600	TcX10_chr26:479484-479884	DCT	TM	OK	617916	275613	-1.16477	-3.39465	5e-05	0.000105404	yes
XLOC_020360	XLOC_020360	TcSYL_0074800	TcX10_chr9:164786-165591	DCT	TM	OK	864199	454424	-0.927324	-3.39493	5e-05	0.000105404	yes
XLOC_014578	XLOC_014578	TcSYL_0041210	TcX10_chr4:1065435-1065985	DCT	TM	OK	271628	116012	-1.22736	-3.39521	5e-05	0.000105404	yes
XLOC_011368	XLOC_011368	TcSYL_0164660	TcX10_chr34:389511-390496	DCT	TM	OK	738435	256839	-1.52361	-3.39583	5e-05	0.000105404	yes
XLOC_016479	XLOC_016479	TcSYL_0200920	TcX10_chr44:179886-180349	DCT	TM	OK	374052	157512	-1.24778	-3.39728	5e-05	0.000105404	yes
XLOC_010614	XLOC_010614	TcSYL_0156940	TcX10_chr31:443301-443689	DCT	TM	OK	376819	145941	-1.36849	-3.39909	5e-05	0.000105404	yes
XLOC_014027	XLOC_014027	TcSYL_0044140	TcX10_chr4:1417787-1418019	DCT	TM	OK	284424	462968	-2.61906	-3.40187	5e-05	0.000105404	yes
XLOC_002597	XLOC_002597	TcSYL_0090080	TcX10_chr12:322033-322280	DCT	TM	OK	428421	741203	-2.53109	-3.40355	5e-05	0.000105404	yes
XLOC_004236	XLOC_004236	TcSYL_0107780	TcX10_chr15:667625-668316	DCT	TM	OK	223119	967685	-1.2052	-3.40578	5e-05	0.000105404	yes
XLOC_005019	XLOC_005019	TcSYL_0117450	TcX10_chr19:760758-761032	DCT	TM	OK	511824	148921	-1.7811	-3.40631	5e-05	0.000105404	yes
XLOC_020066	XLOC_020066	TcSYL_0076520	TcX10_chr9:607018-607418	DCT	TM	OK	613996	275183	-1.15784	-3.40859	5e-05	0.000105404	yes
XLOC_004736	XLOC_004736	TcSYL_0113500	TcX10_chr18:411616-412181	DCT	TM	OK	521205	252407	-1.0461	-3.41414	5e-05	0.000105404	yes
XLOC_009020	XLOC_009020	TcSYL_0147420	TcX10_chr29:275161-275816	DCT	TM	OK	1140.51	596176	-0.935869	-3.41493	5e-05	0.000105404	yes
XLOC_003178	XLOC_003178	TcSYL_0096370	TcX10_chr13:665418-666178	DCT	TM	OK	292709	137.55	-1.08951	-3.42001	5e-05	0.000105404	yes
XLOC_018888	XLOC_018888	TcSYL_0064960	TcX10_chr7:1144548-1144945	DCT	TM	OK	131938	233158	-2.50048	-3.4209	5e-05	0.000105404	yes
XLOC_020096	XLOC_020096	TcSYL_0076920	TcX10_chr9:633929-634251	DCT	TM	OK	643122	252078	-1.35122	-3.42732	5e-05	0.000105404	yes
XLOC_009303	XLOC_009303	TcSYL_0026800	TcX10_chr3:1060146-1060345	DCT	TM	OK	1416.62	635615	-1.15622	-3.42901	0.00365	0.00593282	yes
XLOC_004936	XLOC_004936	TcSYL_0114980	TcX10_chr18:742026-743014	DCT	TM	OK	272924	132.12	-1.04665	-3.43184	5e-05	0.000105404	yes
XLOC_008094	XLOC_008094	TcSYL_0138790	TcX10_chr25:219842-220404	DCT	TM	OK	320669	138744	-1.20865	-3.43202	5e-05	0.000105404	yes
XLOC_012164	XLOC_012164	TcSYL_0172580	TcX10_chr37:169375-169754	DCT	TM	OK	263882	815309	-1.69448	-3.43405	5e-05	0.000105404	yes
XLOC_017125	XLOC_017125	TcSYL_0046170	TcX10_chr5:442072-443066	DCT	TM	OK	503761	259.9	-0.954785	-3.43488	5e-05	0.000105404	yes
XLOC_017516	XLOC_017516	TcSYL_0048670	TcX10_chr5:1152421-1153694	DCT	TM	OK	381969	197923	-0.948517	-3.43623	5e-05	0.000105404	yes
XLOC_015260	XLOC_015260	TcSYL_0189240	TcX10_chr41:314870-315189	DCT	TM	OK	684498	267815	-1.35381	-3.4399	5e-05	0.000105404	yes
XLOC_012102	XLOC_012102	TcSYL_0171740	TcX10_chr37:104312-104889	DCT	TM	OK	541394	663192	-3.02918	-3.44572	5e-05	0.000105404	yes
XLOC_004494	XLOC_004494	TcSYL_0112060	TcX10_chr16:1295449-1295852	DCT	TM	OK	323636	119653	-1.43552	-3.44679	5e-05	0.000105404	yes
XLOC_012431	XLOC_012431	TcSYL_0174960	TcX10_chr38:93584-94497	DCT	TM	OK	177295	78594	-1.17366	-3.45079	5e-05	0.000105404	yes
XLOC_000496	XLOC_000496	TcSYL_0009910	TcX10_chr1:1966384-1967147	DCT	TM	OK	646468	155039	-2.05994	-3.45703	5e-05	0.000105404	yes
XLOC_007755	XLOC_007755	TcSYL_0137890	TcX10_chr24:633288-634864	DCT	TM	OK	256219	130449	-0.973888	-3.45865	5e-05	0.000105404	yes
XLOC_003864	XLOC_003864	TcSYL_0105710	TcX10_chr15:263257-263687	DCT	TM	OK	493254	212.68	-1.21365	-3.46279	5e-05	0.000105404	yes
XLOC_012322	XLOC_012322	TcSYL_0172600	TcX10_chr37:171017-171564	DCT	TM	OK	189128	675334	-1.48569	-3.46712	5e-05	0.000105404	yes
XLOC_017595	XLOC_017595	TcSYL_0050230	TcX10_chr6:118027-118340	DCT	TM	OK	2222.92	1091.38	-1.0263	-3.46982	5e-05	0.000105404	yes
XLOC_007762	XLOC_007762	TcSYL_0137960	TcX10_chr24:663289-665687	DCT	TM	OK	187041	46401	-2.01113	-3.47238	5e-05	0.000105404	yes
XLOC_002019	XLOC_002019	TcSYL_0087440	TcX10_chr11:790654-792449	DCT	TM	OK	137806	666987	-1.04691	-3.48042	5e-05	0.000105404	yes
XLOC_011382	XLOC_011382	TcSYL_0164850	TcX10_chr34:401338-401930	DCT	TM	OK	157957	543826	-1.53832	-3.48046	5e-05	0.000105404	yes
XLOC_012002	XLOC_012002	TcSYL_0171110	TcX10_chr36:469981-471155	DCT	TM	OK	303458	151449	-1.00267	-3.48081	5e-05	0.000105404	yes
XLOC_002061	XLOC_002061	TcSYL_0088040	TcX10_chr11:854271-854764	DCT	TM	OK	3160.41	1630.06	-0.955189	-3.4886	5e-05	0.000105404	yes
XLOC_014965	XLOC_014965	TcSYL_0186640	TcX10_chr40:420271-420638	DCT	TM	OK	252295	732016	-1.78516	-3.49129	5e-05	0.000105404	yes
XLOC_002770	XLOC_002770	TcSYL_0094660	TcX10_chr13:428482-428798	DCT	TM	OK	1258.06	581.22	-1.11404	-3.49229	5e-05	0.000105404	yes
XLOC_010704	XLOC_010704	TcSYL_0158510	TcX10_chr32:509611-509930	DCT	TM	OK	358126	103531	-1.7904	-3.49375	5e-05	0.000105404	yes
XLOC_008356	XLOC_008356	TcSYL_0140580	TcX10_chr26:478321-478562	DCT	TM	OK	804.37	217562	-1.88644	-3.50286	5e-05	0.000105404	yes
XLOC_002345	XLOC_002345	TcSYL_0089160	TcX10_chr12:119203-120620	DCT	TM	OK	203004	993319	-1.03118	-3.50361	5e-05	0.000105404	yes
XLOC_001967	XLOC_001967	TcSYL_0086670	TcX10_chr11:629361-630196	DCT	TM	OK	232596	103965	-1.16173	-3.50854	5e-05	0.000105404	yes
XLOC_002515	XLOC_002515	TcSYL_0091690	TcX10_chr12:548940-549208	DCT	TM	OK	749715	246238	-1.60629	-3.50873	5e-05	0.000105404	yes
XLOC_000774	XLOC_000774	TcSYL_0000150	TcX10_chr1:24854-25734	DCT	TM	OK	385129	0.946	-5.34736	-3.51296	0.0065	0.0101343	yes
XLOC_011699	XLOC_011699	TcSYL_0166800	TcX10_chr35:221473-221783	DCT	TM	OK	722076	278259	-1.37572	-3.51345	5e-05	0.000105404	yes
XLOC_012876	XLOC_012876	TcSYL_0180780	TcX10_chr39:225624-225898	DCT	TM	OK	464406	118141	-1.97488	-3.51578	5e-05	0.000105404	yes
XLOC_006587	XLOC_006587	TcSYL_0122980	TcX10_chr21:471641-472494	DCT	TM	OK	649397	327.62	-0.987076	-3.52423	5e-05	0.000105404	yes
XLOC_012001	XLOC_012001	TcSYL_0171100	TcX10_chr36:468449-469953	DCT	TM	OK	251294	124784	-1.00994	-3.5316	5e-05	0.000105404	yes
XLOC_008626	XLOC_008626	TcSYL_0145540	TcX10_chr28:337695-339229	DCT	TM	OK	228631	113344	-1.01231	-3.53977	5e-05	0.000105404	yes
XLOC_018698	XLOC_018698	TcSYL_0062090	TcX10_chr7:181885-182744	DCT	TM	OK	778447	397876	-0.968281	-3.54083	5e-05	0.000105404	yes
XLOC_010536	XLOC_010536	TcSYL_0155970	TcX10_chr31:49759-50648	DCT	TM	OK	255.6	117579	-1.12025	-3.54111	5e-05	0.000105404	yes
XLOC_008181	XLOC_008181	TcSYL_0140550	TcX10_chr26:466043-466377	DCT	TM	OK	721829	294264	-1.29455	-3.54391	5e-05	0.000105404	yes
XLOC_005889	XLOC_005889	TcSYL_0019730	TcX10_chr2:916066-916823	DCT	TM	OK	1451.06	735772	-0.979776	-3.55528	5e-05	0.000105404	yes
XLOC_008184	XLOC_008184	TcSYL_0140590	TcX10_chr26:478720-479459	DCT	TM	OK	559379	272608	-1.037	-3.55565	5e-05	0.000105404	yes
XLOC_007380	XLOC_007380	TcSYL_0131120	TcX10_chr23:517810-518081	DCT	TM	OK	1917.07	840841	-1.189	-3.55861	5e-05	0.000105404	yes
XLOC_000961	XLOC_000961	TcSYL_0003820	TcX10_chr1:1071192-1071733	DCT	TM	OK	182866	607571	-1.58966	-3.56331	5e-05	0.000105404	yes
XLOC_006242	XLOC_006242	TcSYL_0118450	TcX10_chr20:334399-335222	DCT	TM	OK	950021	310553	-1.61312	-3.56911	5e-05	0.000105404	yes
XLOC_013036	XLOC_013036	TcSYL_0178560	TcX10_chr39:10570-10997	DCT	TM	OK	348221	129.1	-1.43151	-3.5741	5e-05	0.000105404	yes
XLOC_004423	XLOC_004423	TcSYL_0111210	TcX10_chr16:1044056-1045104	DCT	TM	OK	835019	427967	-0.964308	-3.57518	5e-05	0.000105404	yes
XLOC_001832	XLOC_001832	TcSYL_0084860	TcX10_chr11:348725-349146	DCT	TM	OK	306932	107306	-1.51619	-3.57821	5e-05	0.000105404	yes
XLOC_006487	XLOC_006487	TcSYL_0121690	TcX10_chr21:119720-120348	DCT	TM	OK	484195	227639	-1.08884	-3.57829	5e-05	0.000105404	yes
XLOC_003507	XLOC_003507	TcSYL_0102110	TcX10_chr14:792545-792864	DCT	TM	OK	245532	430836	-2.5107	-3.58471	5e-05	0.000105404	yes
XLOC_012944	XLOC_012944	TcSYL_0181840	TcX10_chr39:329600-329913	DCT	TM	OK	300381	67405	-2.15587	-3.5859	5e-05	0.000105404	yes
XLOC_010727	XLOC_010727	TcSYL_0159120	TcX10_chr32:551302-551639	DCT	TM	OK	1024.48	449.44	-1.18869	-3.58963	5e-05	0.000105404	yes
XLOC_002546	XLOC_002546	TcSYL_0092290	TcX10_chr12:978437-979356	DCT	TM	OK	255.18	118839	-1.10251	-3.5935	5e-05	0.000105404	yes
XLOC_013106	XLOC_013106	TcSYL_0179500	TcX10_chr39:110548-111245	DCT	TM	OK	132034	435787	-1.59922	-3.60255	5e-05	0.000105404	yes
XLOC_020382	XLOC_020382	TcSYL_0075030	TcX10_chr9:249393-249706	DCT	TM	OK	835996	329225	-1.34442	-3.60351	5e-05	0.000105404	yes
XLOC_020246	XLOC_020246	TcSYL_0078950	TcX10_chr9:923064-923287	DCT	TM	OK	1850.82	665643	-1.47534	-3.6045	5e-05	0.000105404	yes
XLOC_010713	XLOC_010713	TcSYL_0158680	TcX10_chr32:519356-519726	DCT	TM	OK	405071	144046	-1.49164	-3.60463	5e-05	0.000105404	yes
XLOC_009264	XLOC_009264	TcSYL_0026260	TcX10_chr3:1023321-1023679	DCT	TM	OK	216287	44809	-2.27108	-3.60609	5e-05	0.000105404	yes
XLOC_010611	XLOC_010611	TcSYL_0156910	TcX10_chr31:433228-433712	DCT	TM	OK	937531	106739	-3.13478	-3.60917	5e-05	0.000105404	yes
XLOC_006533	XLOC_006533	TcSYL_0122260	TcX10_chr21:315829-316541	DCT	TM	OK	248153	106422	-1.22143	-3.60933	5e-05	0.000105404	yes
XLOC_003806	XLOC_003806	TcSYL_0103610	TcX10_chr14:915730-915941	DCT	TM	OK	2984.77	1134.53	-1.39553	-3.61125	5e-05	0.000105404	yes
XLOC_016710	XLOC_016710	TcSYL_0202390	TcX10_chr45:209080-211337	DCT	TM	OK	308942	154519	-0.999553	-3.61831	5e-05	0.000105404	yes
XLOC_004956	XLOC_004956	TcSYL_0115530	TcX10_chr19:397105-398171	DCT	TM	OK	161144	690562	-1.2225	-3.6211	5e-05	0.000105404	yes
XLOC_013731	XLOC_013731	TcSYL_0036810	TcX10_chr4:492274-493418	DCT	TM	OK	25339	282426	-3.16542	-3.62396	5e-05	0.000105404	yes
XLOC_010530	XLOC_010530	TcSYL_0155910	TcX10_chr31:26480-26907	DCT	TM	OK	488592	200781	-1.28301	-3.62415	5e-05	0.000105404	yes
XLOC_006381	XLOC_006381	TcSYL_0122440	TcX10_chr21:402910-403340	DCT	TM	OK	755184	341872	-1.14337	-3.62808	5e-05	0.000105404	yes
XLOC_004062	XLOC_004062	TcSYL_0105430	TcX10_chr15:243780-244189	DCT	TM	OK	319435	107879	-1.5661	-3.62856	5e-05	0.000105404	yes
XLOC_012238	XLOC_012238	TcSYL_0174300	TcX10_chr37:319451-319860	DCT	TM	OK	467473	183918	-1.34582	-3.62968	5e-05	0.000105404	yes
XLOC_001685	XLOC_001685	TcSYL_0080470	TcX10_chr10:190674-191002	DCT	TM	OK	775432	305874	-1.34206	-3.63256	5e-05	0.000105404	yes
XLOC_011356	XLOC_011356	TcSYL_0164510	TcX10_chr34:381544-381767	DCT	TM	OK	2179.26	779346	-1.4835	-3.65032	5e-05	0.000105404	yes
XLOC_003731	XLOC_003731	TcSYL_0102560	TcX10_chr14:821384-821586	DCT	TM	OK	1082.95	130269	-3.05541	-3.65087	5e-05	0.000105404	yes
XLOC_020350	XLOC_020350	TcSYL_0074700	TcX10_chr9:136229-136542	DCT	TM	OK	6933.72	3479.39	-0.994796	-3.65558	5e-05	0.000105404	yes
XLOC_002896	XLOC_002896	TcSYL_0097450	TcX10_chr13:743839-744140	DCT	TM	OK	831256	311241	-1.41726	-3.65909	5e-05	0.000105404	yes
XLOC_012408	XLOC_012408	TcSYL_0174150	TcX10_chr37:308898-309238	DCT	TM	OK	598963	223754	-1.42056	-3.6662	5e-05	0.000105404	yes
XLOC_012433	XLOC_012433	TcSYL_0174980	TcX10_chr38:101319-103612	DCT	TM	OK	294056	147245	-0.997879	-3.66901	5e-05	0.000105404	yes
XLOC_005861	XLOC_005861	TcSYL_0019450	TcX10_chr2:819876-820606	DCT	TM	OK	284234	124099	-1.19559	-3.6743	5e-05	0.000105404	yes
XLOC_018487	XLOC_018487	TcSYL_0057540	TcX10_chr6:1069664-1069866	DCT	TM	OK	652049	509722	-3.6772	-3.67688	5e-05	0.000105404	yes
XLOC_002106	XLOC_002106	TcSYL_0088650	TcX10_chr11:1008117-1009042	DCT	TM	OK	868705	430682	-1.01224	-3.68264	5e-05	0.000105404	yes
XLOC_012942	XLOC_012942	TcSYL_0181800	TcX10_chr39:327533-328251	DCT	TM	OK	119647	380123	-1.65424	-3.6887	5e-05	0.000105404	yes
XLOC_012824	XLOC_012824	TcSYL_0180000	TcX10_chr39:153785-154731	DCT	TM	OK	218028	955227	-1.1906	-3.6962	5e-05	0.000105404	yes
XLOC_012569	XLOC_012569	TcSYL_0176930	TcX10_chr38:319143-319513	DCT	TM	OK	199033	379995	-2.38896	-3.69912	5e-05	0.000105404	yes
XLOC_018258	XLOC_018258	TcSYL_0053940	TcX10_chr6:684545-684924	DCT	TM	OK	158.22	243269	-2.7013	-3.70226	5e-05	0.000105404	yes
XLOC_001467	XLOC_001467	TcSYL_0080560	TcX10_chr10:220742-221964	DCT	TM	OK	1230.34	592.77	-1.05351	-3.70411	5e-05	0.000105404	yes
XLOC_002871	XLOC_002871	TcSYL_0096320	TcX10_chr13:661902-663067	DCT	TM	OK	524626	263036	-0.996032	-3.70564	5e-05	0.000105404	yes
XLOC_001847	XLOC_001847	TcSYL_0085040	TcX10_chr11:369374-369624	DCT	TM	OK	1633.67	634504	-1.36441	-3.71552	5e-05	0.000105404	yes
XLOC_008639	XLOC_008639	TcSYL_0145790	TcX10_chr28:354453-354682	DCT	TM	OK	1063.14	274	-1.95608	-3.71687	5e-05	0.000105404	yes
XLOC_002014	XLOC_002014	TcSYL_0087320	TcX10_chr11:784826-786093	DCT	TM	OK	331221	560373	-2.56333	-3.71967	5e-05	0.000105404	yes
XLOC_004752	XLOC_004752	TcSYL_0113690	TcX10_chr18:462169-462713	DCT	TM	OK	854695	114191	-2.90396	-3.7237	5e-05	0.000105404	yes
XLOC_000910	XLOC_000910	TcSYL_0002950	TcX10_chr1:870546-871507	DCT	TM	OK	225575	989672	-1.18859	-3.72855	5e-05	0.000105404	yes
XLOC_014567	XLOC_014567	TcSYL_0041080	TcX10_chr4:1043292-1044790	DCT	TM	OK	484376	146396	-1.72625	-3.73102	5e-05	0.000105404	yes
XLOC_000158	XLOC_000158	TcSYL_0003560	TcX10_chr1:1029089-1029522	DCT	TM	OK	476642	189902	-1.32765	-3.73133	5e-05	0.000105404	yes
XLOC_002457	XLOC_002457	TcSYL_0090820	TcX10_chr12:380952-381562	DCT	TM	OK	188156	660078	-1.51122	-3.73281	5e-05	0.000105404	yes
XLOC_000690	XLOC_000690	TcSYL_0013540	TcX10_chr1:2698607-2699700	DCT	TM	OK	345756	164666	-1.07021	-3.73711	5e-05	0.000105404	yes
XLOC_005044	XLOC_005044	TcSYL_0115230	TcX10_chr19:277760-278448	DCT	TM	OK	353629	153471	-1.20427	-3.74108	5e-05	0.000105404	yes
XLOC_005478	XLOC_005478	TcSYL_0019860	TcX10_chr2:952158-953323	DCT	TM	OK	286326	134067	-1.09471	-3.74238	5e-05	0.000105404	yes
XLOC_004263	XLOC_004263	TcSYL_0108060	TcX10_chr15:785194-785396	DCT	TM	OK	1103.18	131102	-3.07291	-3.74911	5e-05	0.000105404	yes
XLOC_000707	XLOC_000707	TcSYL_0014120	TcX10_chr1:2950735-2951231	DCT	TM	OK	316529	117119	-1.43436	-3.74919	5e-05	0.000105404	yes
XLOC_004840	XLOC_004840	TcSYL_0114760	TcX10_chr18:670036-670370	DCT	TM	OK	1441.54	645857	-1.15832	-3.74924	5e-05	0.000105404	yes
XLOC_014493	XLOC_014493	TcSYL_0039910	TcX10_chr4:917835-918823	DCT	TM	OK	876144	279413	-1.64877	-3.75357	5e-05	0.000105404	yes
XLOC_005317	XLOC_005317	TcSYL_0016350	TcX10_chr2:409901-411300	DCT	TM	OK	252.76	117814	-1.10126	-3.75571	5e-05	0.000105404	yes
XLOC_011745	XLOC_011745	TcSYL_0167280	TcX10_chr35:352599-352900	DCT	TM	OK	518614	154701	-1.74518	-3.75691	5e-05	0.000105404	yes
XLOC_000515	XLOC_000515	TcSYL_0010180	TcX10_chr1:1986627-1986838	DCT	TM	OK	1939.49	541125	-1.84164	-3.76204	5e-05	0.000105404	yes
XLOC_004585	XLOC_004585	TcSYL_0109360	TcX10_chr16:204302-204672	DCT	TM	OK	445395	152903	-1.54247	-3.76216	5e-05	0.000105404	yes
XLOC_016620	XLOC_016620	TcSYL_0201790	TcX10_chr44:416695-418385	DCT	TM	OK	393012	192328	-1.031	-3.76817	5e-05	0.000105404	yes
XLOC_012436	XLOC_012436	TcSYL_0175010	TcX10_chr38:127865-128643	DCT	TM	OK	358.57	160684	-1.15802	-3.77163	5e-05	0.000105404	yes
XLOC_009000	XLOC_009000	TcSYL_0147210	TcX10_chr29:187070-187317	DCT	TM	OK	4036.29	1845.19	-1.12926	-3.77452	5e-05	0.000105404	yes
XLOC_000246	XLOC_000246	TcSYL_0004580	TcX10_chr1:1214178-1215013	DCT	TM	OK	508074	239041	-1.08778	-3.77721	5e-05	0.000105404	yes
XLOC_001947	XLOC_001947	TcSYL_0086460	TcX10_chr11:562083-563131	DCT	TM	OK	247617	111593	-1.14987	-3.77786	5e-05	0.000105404	yes
XLOC_013354	XLOC_013354	TcSYL_0030640	TcX10_chr4:74980-75218	DCT	TM	OK	534572	659183	-3.01963	-3.78621	5e-05	0.000105404	yes
XLOC_004982	XLOC_004982	TcSYL_0115810	TcX10_chr19:489142-489389	DCT	TM	OK	424383	240215	-4.14297	-3.79363	5e-05	0.000105404	yes
XLOC_003249	XLOC_003249	TcSYL_0097280	TcX10_chr13:732915-733264	DCT	TM	OK	448872	146046	-1.61988	-3.79568	5e-05	0.000105404	yes
XLOC_000302	XLOC_000302	TcSYL_0005280	TcX10_chr1:1361555-1361760	DCT	TM	OK	2092.05	538006	-1.95922	-3.80164	5e-05	0.000105404	yes
XLOC_004461	XLOC_004461	TcSYL_0111720	TcX10_chr16:1173168-1173889	DCT	TM	OK	301.34	127275	-1.24345	-3.80274	5e-05	0.000105404	yes
XLOC_014772	XLOC_014772	TcSYL_0043880	TcX10_chr4:1347312-1347529	DCT	TM	OK	1138.22	240505	-2.24264	-3.80758	5e-05	0.000105404	yes
XLOC_018502	XLOC_018502	TcSYL_0057730	TcX10_chr6:1081188-1081642	DCT	TM	OK	191108	48.8	-1.96943	-3.81229	5e-05	0.000105404	yes
XLOC_004583	XLOC_004583	TcSYL_0109340	TcX10_chr16:195491-196473	DCT	TM	OK	437939	207058	-1.08069	-3.81231	5e-05	0.000105404	yes
XLOC_004711	XLOC_004711	TcSYL_0112750	TcX10_chr18:52583-54096	DCT	TM	OK	791487	379149	-1.0618	-3.81395	5e-05	0.000105404	yes
XLOC_000710	XLOC_000710	TcSYL_0014150	TcX10_chr1:2955774-2956504	DCT	TM	OK	104607	289147	-1.8551	-3.81596	5e-05	0.000105404	yes
XLOC_013496	XLOC_013496	TcSYL_0032830	TcX10_chr4:226359-227032	DCT	TM	OK	521507	335809	-3.95697	-3.81628	5e-05	0.000105404	yes
XLOC_017408	XLOC_017408	TcSYL_0047490	TcX10_chr5:883544-884460	DCT	TM	OK	522831	248436	-1.07347	-3.82069	5e-05	0.000105404	yes
XLOC_004518	XLOC_004518	TcSYL_0112300	TcX10_chr16:1350871-1352099	DCT	TM	OK	312796	146221	-1.09707	-3.82557	5e-05	0.000105404	yes
XLOC_001944	XLOC_001944	TcSYL_0086430	TcX10_chr11:550091-550455	DCT	TM	OK	330788	939258	-1.81631	-3.82798	5e-05	0.000105404	yes
XLOC_012175	XLOC_012175	TcSYL_0172720	TcX10_chr37:180320-180528	DCT	TM	OK	1224.03	203111	-2.5913	-3.82941	5e-05	0.000105404	yes
XLOC_012418	XLOC_012418	TcSYL_0174260	TcX10_chr37:316853-317940	DCT	TM	OK	495276	237063	-1.06297	-3.84161	5e-05	0.000105404	yes
XLOC_012583	XLOC_012583	TcSYL_0177130	TcX10_chr38:329033-329937	DCT	TM	OK	142927	524195	-1.44711	-3.84737	5e-05	0.000105404	yes
XLOC_011942	XLOC_011942	TcSYL_0170430	TcX10_chr36:364168-365336	DCT	TM	OK	448193	209264	-1.0988	-3.84768	5e-05	0.000105404	yes
XLOC_010932	XLOC_010932	TcSYL_0159390	TcX10_chr32:594917-595602	DCT	TM	OK	206773	764299	-1.43584	-3.84909	5e-05	0.000105404	yes
XLOC_002586	XLOC_002586	TcSYL_0089700	TcX10_chr12:295020-295660	DCT	TM	OK	158313	47985	-1.72212	-3.84993	5e-05	0.000105404	yes
XLOC_015387	XLOC_015387	TcSYL_0187870	TcX10_chr41:160361-161178	DCT	TM	OK	826998	397271	-1.05776	-3.85302	5e-05	0.000105404	yes
XLOC_014700	XLOC_014700	TcSYL_0043000	TcX10_chr4:1274333-1275012	DCT	TM	OK	189438	669871	-1.49977	-3.85527	5e-05	0.000105404	yes
XLOC_015384	XLOC_015384	TcSYL_0187840	TcX10_chr41:156499-156842	DCT	TM	OK	219564	341686	-2.6839	-3.86083	5e-05	0.000105404	yes
XLOC_009262	XLOC_009262	TcSYL_0026240	TcX10_chr3:1022575-1022858	DCT	TM	OK	311867	429718	-2.85947	-3.8609	5e-05	0.000105404	yes
XLOC_013665	XLOC_013665	TcSYL_0035830	TcX10_chr4:420650-421953	DCT	TM	OK	223444	173116	-3.69011	-3.86115	5e-05	0.000105404	yes
XLOC_013037	XLOC_013037	TcSYL_0178570	TcX10_chr39:11109-11437	DCT	TM	OK	556423	180876	-1.62118	-3.87065	5e-05	0.000105404	yes
XLOC_006402	XLOC_006402	TcSYL_0123080	TcX10_chr21:518191-520073	DCT	TM	OK	322586	154497	-1.06211	-3.87114	5e-05	0.000105404	yes
XLOC_004724	XLOC_004724	TcSYL_0112880	TcX10_chr18:117038-117381	DCT	TM	OK	1017.91	425.55	-1.25821	-3.8739	5e-05	0.000105404	yes
XLOC_004981	XLOC_004981	TcSYL_0115800	TcX10_chr19:483686-485238	DCT	TM	OK	393373	942481	-2.06136	-3.8755	5e-05	0.000105404	yes
XLOC_004336	XLOC_004336	TcSYL_0109540	TcX10_chr16:335972-336294	DCT	TM	OK	665521	228187	-1.54427	-3.87667	5e-05	0.000105404	yes
XLOC_008829	XLOC_008829	TcSYL_0145600	TcX10_chr28:344029-344291	DCT	TM	OK	800003	217121	-1.8815	-3.87905	5e-05	0.000105404	yes
XLOC_014773	XLOC_014773	TcSYL_0043900	TcX10_chr4:1348237-1348541	DCT	TM	OK	1289.28	537126	-1.26324	-3.88275	5e-05	0.000105404	yes
XLOC_004527	XLOC_004527	TcSYL_0112390	TcX10_chr16:1396857-1397095	DCT	TM	OK	3969.96	1798.51	-1.14233	-3.88288	5e-05	0.000105404	yes
XLOC_000103	XLOC_000103	TcSYL_0002010	TcX10_chr1:799445-801318	DCT	TM	OK	139348	619884	-1.16862	-3.88362	5e-05	0.000105404	yes
XLOC_008080	XLOC_008080	TcSYL_0138650	TcX10_chr25:188265-188674	DCT	TM	OK	492.82	180704	-1.44743	-3.88702	5e-05	0.000105404	yes
XLOC_020086	XLOC_020086	TcSYL_0076760	TcX10_chr9:624741-625207	DCT	TM	OK	437112	164604	-1.409	-3.9006	5e-05	0.000105404	yes
XLOC_010539	XLOC_010539	TcSYL_0156000	TcX10_chr31:66331-66593	DCT	TM	OK	793816	221674	-1.84037	-3.90106	5e-05	0.000105404	yes
XLOC_000691	XLOC_000691	TcSYL_0013550	TcX10_chr1:2705935-2707097	DCT	TM	OK	334187	154105	-1.11674	-3.90257	5e-05	0.000105404	yes
XLOC_013518	XLOC_013518	TcSYL_0033220	TcX10_chr4:249092-249996	DCT	TM	OK	363308	28475	-3.67342	-3.90318	5e-05	0.000105404	yes
XLOC_000327	XLOC_000327	TcSYL_0005640	TcX10_chr1:1383736-1384067	DCT	TM	OK	3317.44	1585.86	-1.0648	-3.90806	5e-05	0.000105404	yes
XLOC_001976	XLOC_001976	TcSYL_0086860	TcX10_chr11:721193-722649	DCT	TM	OK	846404	301949	-1.48704	-3.90893	5e-05	0.000105404	yes
XLOC_005045	XLOC_005045	TcSYL_0115240	TcX10_chr19:278957-279600	DCT	TM	OK	181763	623034	-1.54467	-3.91242	5e-05	0.000105404	yes
XLOC_014698	XLOC_014698	TcSYL_0042980	TcX10_chr4:1265456-1265808	DCT	TM	OK	8445.74	3977.73	-1.08628	-3.91288	5e-05	0.000105404	yes
XLOC_004232	XLOC_004232	TcSYL_0107740	TcX10_chr15:655455-656239	DCT	TM	OK	522826	239675	-1.12526	-3.91433	5e-05	0.000105404	yes
XLOC_004907	XLOC_004907	TcSYL_0113670	TcX10_chr18:461088-461650	DCT	TM	OK	67.76	440974	-3.94167	-3.92162	5e-05	0.000105404	yes
XLOC_012564	XLOC_012564	TcSYL_0176880	TcX10_chr38:258944-259377	DCT	TM	OK	412421	150528	-1.45409	-3.92168	5e-05	0.000105404	yes
XLOC_003203	XLOC_003203	TcSYL_0096680	TcX10_chr13:685556-686010	DCT	TM	OK	262.81	79.66	-1.72209	-3.9342	5e-05	0.000105404	yes
XLOC_017470	XLOC_017470	TcSYL_0048110	TcX10_chr5:1069339-1069664	DCT	TM	OK	622057	207443	-1.58433	-3.93657	5e-05	0.000105404	yes
XLOC_009019	XLOC_009019	TcSYL_0147410	TcX10_chr29:269477-269790	DCT	TM	OK	894588	330215	-1.43782	-3.93843	5e-05	0.000105404	yes
XLOC_004556	XLOC_004556	TcSYL_0109070	TcX10_chr16:37005-37375	DCT	TM	OK	152447	15123	-3.33349	-3.94602	5e-05	0.000105404	yes
XLOC_011945	XLOC_011945	TcSYL_0170460	TcX10_chr36:373058-373542	DCT	TM	OK	756026	328.32	-1.20333	-3.94631	5e-05	0.000105404	yes
XLOC_001657	XLOC_001657	TcSYL_0083350	TcX10_chr10:1046885-1047099	DCT	TM	OK	1060.42	147269	-2.84812	-3.94722	5e-05	0.000105404	yes
XLOC_016618	XLOC_016618	TcSYL_0201770	TcX10_chr44:413107-414440	DCT	TM	OK	441614	207643	-1.08868	-3.95284	5e-05	0.000105404	yes
XLOC_001441	XLOC_001441	TcSYL_0013790	TcX10_chr1:2805938-2807292	DCT	TM	OK	541595	150498	-1.84747	-3.95429	5e-05	0.000105404	yes
XLOC_019491	XLOC_019491	TcSYL_0065780	TcX10_chr7:1363217-1363620	DCT	TM	OK	223752	481104	-2.21748	-3.95791	5e-05	0.000105404	yes
XLOC_013939	XLOC_013939	TcSYL_0040990	TcX10_chr4:1039953-1040191	DCT	TM	OK	533398	159327	-5.06515	-3.95911	5e-05	0.000105404	yes
XLOC_005034	XLOC_005034	TcSYL_0115120	TcX10_chr19:246643-247076	DCT	TM	OK	472935	173227	-1.44898	-3.96095	5e-05	0.000105404	yes
XLOC_013478	XLOC_013478	TcSYL_0032600	TcX10_chr4:207057-207748	DCT	TM	OK	114056	292713	-1.96218	-3.96165	5e-05	0.000105404	yes
XLOC_004167	XLOC_004167	TcSYL_0106960	TcX10_chr15:496254-497680	DCT	TM	OK	374005	173295	-1.10983	-3.96475	5e-05	0.000105404	yes
XLOC_011695	XLOC_011695	TcSYL_0166740	TcX10_chr35:217879-218312	DCT	TM	OK	579822	230654	-1.32988	-3.96837	5e-05	0.000105404	yes
XLOC_015467	XLOC_015467	TcSYL_0190250	TcX10_chr41:422791-423167	DCT	TM	OK	941472	389.68	-1.27263	-3.97304	5e-05	0.000105404	yes
XLOC_001843	XLOC_001843	TcSYL_0084990	TcX10_chr11:366412-366758	DCT	TM	OK	743167	277198	-1.42277	-3.97536	5e-05	0.000105404	yes
XLOC_000823	XLOC_000823	TcSYL_0001000	TcX10_chr1:373553-374208	DCT	TM	OK	3187.88	1462.37	-1.1243	-3.97563	5e-05	0.000105404	yes
XLOC_005062	XLOC_005062	TcSYL_0115840	TcX10_chr19:492766-493376	DCT	TM	OK	199126	620332	-1.68257	-3.98473	5e-05	0.000105404	yes
XLOC_000205	XLOC_000205	TcSYL_0004170	TcX10_chr1:1112787-1113343	DCT	TM	OK	478339	197006	-1.27979	-3.98477	5e-05	0.000105404	yes
XLOC_004864	XLOC_004864	TcSYL_0112970	TcX10_chr18:304680-305278	DCT	TM	OK	379.27	155664	-1.28479	-3.98866	5e-05	0.000105404	yes
XLOC_012208	XLOC_012208	TcSYL_0173430	TcX10_chr37:240378-240700	DCT	TM	OK	498782	142328	-1.80919	-3.98882	5e-05	0.000105404	yes
XLOC_000742	XLOC_000742	TcSYL_0014470	TcX10_chr1:3057789-3058615	DCT	TM	OK	474486	211765	-1.1639	-4.00027	5e-05	0.000105404	yes
XLOC_014606	XLOC_014606	TcSYL_0041600	TcX10_chr4:1159266-1159813	DCT	TM	OK	883198	771624	-3.51677	-4.0015	5e-05	0.000105404	yes
XLOC_011837	XLOC_011837	TcSYL_0169020	TcX10_chr36:121655-122631	DCT	TM	OK	225627	919719	-1.29468	-4.00343	5e-05	0.000105404	yes
XLOC_013718	XLOC_013718	TcSYL_0036590	TcX10_chr4:476602-477662	DCT	TM	OK	340472	266141	-3.67727	-4.00496	5e-05	0.000105404	yes
XLOC_003283	XLOC_003283	TcSYL_0097750	TcX10_chr13:761489-762567	DCT	TM	OK	644.7	299953	-1.10389	-4.009	5e-05	0.000105404	yes
XLOC_006363	XLOC_006363	TcSYL_0121410	TcX10_chr21:312-841	DCT	TM	OK	787905	347166	-1.1824	-4.01321	5e-05	0.000105404	yes
XLOC_017169	XLOC_017169	TcSYL_0046690	TcX10_chr5:588194-589098	DCT	TM	OK	445239	200178	-1.1533	-4.01353	5e-05	0.000105404	yes
XLOC_007509	XLOC_007509	TcSYL_0132830	TcX10_chr23:641951-642285	DCT	TM	OK	1082.41	423048	-1.35536	-4.01763	5e-05	0.000105404	yes
XLOC_008389	XLOC_008389	TcSYL_0141670	TcX10_chr27:26642-28425	DCT	TM	OK	202815	911676	-1.15357	-4.01817	5e-05	0.000105404	yes
XLOC_005844	XLOC_005844	TcSYL_0019280	TcX10_chr2:764903-765336	DCT	TM	OK	1129.58	498.27	-1.18079	-4.02049	5e-05	0.000105404	yes
XLOC_001928	XLOC_001928	TcSYL_0086270	TcX10_chr11:512502-513250	DCT	TM	OK	257161	101206	-1.34537	-4.02932	5e-05	0.000105404	yes
XLOC_012383	XLOC_012383	TcSYL_0173810	TcX10_chr37:283092-283474	DCT	TM	OK	394952	119049	-1.73012	-4.02981	5e-05	0.000105404	yes
XLOC_000696	XLOC_000696	TcSYL_0013600	TcX10_chr1:2722126-2722613	DCT	TM	OK	188208	46764	-2.00886	-4.03221	5e-05	0.000105404	yes
XLOC_005159	XLOC_005159	TcSYL_0117040	TcX10_chr19:730106-730362	DCT	TM	OK	871641	224232	-1.95874	-4.03229	5e-05	0.000105404	yes
XLOC_008496	XLOC_008496	TcSYL_0142550	TcX10_chr27:232780-233204	DCT	TM	OK	1828.57	838614	-1.12464	-4.03486	5e-05	0.000105404	yes
XLOC_001833	XLOC_001833	TcSYL_0084870	TcX10_chr11:351068-351417	DCT	TM	OK	546362	179219	-1.60813	-4.04122	5e-05	0.000105404	yes
XLOC_019887	XLOC_019887	TcSYL_0073730	TcX10_chr8:844973-846534	DCT	TM	OK	759953	259827	-1.54836	-4.044	5e-05	0.000105404	yes
XLOC_016561	XLOC_016561	TcSYL_0200780	TcX10_chr44:127337-128739	DCT	TM	OK	195914	839968	-1.22182	-4.04643	5e-05	0.000105404	yes
XLOC_000639	XLOC_000639	TcSYL_0012900	TcX10_chr1:2465460-2465842	DCT	TM	OK	147078	107805	-3.77009	-4.04878	5e-05	0.000105404	yes
XLOC_011956	XLOC_011956	TcSYL_0170570	TcX10_chr36:403649-404013	DCT	TM	OK	262934	557923	-2.23656	-4.05928	5e-05	0.000105404	yes
XLOC_019766	XLOC_019766	TcSYL_0071670	TcX10_chr7:2110787-2111100	DCT	TM	OK	233919	116837	-4.32344	-4.07001	5e-05	0.000105404	yes
XLOC_000231	XLOC_000231	TcSYL_0004430	TcX10_chr1:1179499-1179869	DCT	TM	OK	385867	106581	-1.85616	-4.07212	5e-05	0.000105404	yes
XLOC_002353	XLOC_002353	TcSYL_0089240	TcX10_chr12:138082-138497	DCT	TM	OK	3108.12	1444.8	-1.10517	-4.07566	5e-05	0.000105404	yes
XLOC_000169	XLOC_000169	TcSYL_0003670	TcX10_chr1:1050268-1051253	DCT	TM	OK	425651	186719	-1.1888	-4.07628	5e-05	0.000105404	yes
XLOC_004331	XLOC_004331	TcSYL_0108930	TcX10_chr15:946107-946480	DCT	TM	OK	3272.25	1511.36	-1.11443	-4.07628	5e-05	0.000105404	yes
XLOC_015956	XLOC_015956	TcSYL_0195600	TcX10_chr43:72836-73062	DCT	TM	OK	1347.94	320069	-2.0743	-4.0797	5e-05	0.000105404	yes
XLOC_000477	XLOC_000477	TcSYL_0009690	TcX10_chr1:1949990-1951632	DCT	TM	OK	468447	124414	-1.91274	-4.08708	5e-05	0.000105404	yes
XLOC_017729	XLOC_017729	TcSYL_0053020	TcX10_chr6:622828-623306	DCT	TM	OK	126486	159089	-2.99107	-4.09079	5e-05	0.000105404	yes
XLOC_016602	XLOC_016602	TcSYL_0201550	TcX10_chr44:317411-318459	DCT	TM	OK	238237	979982	-1.28157	-4.09324	5e-05	0.000105404	yes
XLOC_017494	XLOC_017494	TcSYL_0048390	TcX10_chr5:1105858-1107077	DCT	TM	OK	353319	158491	-1.15657	-4.09469	5e-05	0.000105404	yes
XLOC_005213	XLOC_005213	TcSYL_0014900	TcX10_chr2:141536-142269	DCT	TM	OK	658863	295618	-1.15625	-4.09589	5e-05	0.000105404	yes
XLOC_000334	XLOC_000334	TcSYL_0005750	TcX10_chr1:1390786-1391393	DCT	TM	OK	213146	677431	-1.65369	-4.0999	5e-05	0.000105404	yes
XLOC_011709	XLOC_011709	TcSYL_0166920	TcX10_chr35:244385-245292	DCT	TM	OK	332228	140746	-1.23908	-4.1005	5e-05	0.000105404	yes
XLOC_002104	XLOC_002104	TcSYL_0088630	TcX10_chr11:999222-999850	DCT	TM	OK	631816	272772	-1.21181	-4.1066	5e-05	0.000105404	yes
XLOC_006484	XLOC_006484	TcSYL_0121660	TcX10_chr21:114446-115029	DCT	TM	OK	306.27	108999	-1.49048	-4.11058	5e-05	0.000105404	yes
XLOC_010545	XLOC_010545	TcSYL_0156060	TcX10_chr31:110924-111783	DCT	TM	OK	330229	137044	-1.26883	-4.11254	5e-05	0.000105404	yes
XLOC_011115	XLOC_011115	TcSYL_0163110	TcX10_chr33:319707-319918	DCT	TM	OK	893231	233423	-1.93609	-4.11407	5e-05	0.000105404	yes
XLOC_012363	XLOC_012363	TcSYL_0173440	TcX10_chr37:240724-241112	DCT	TM	OK	470.19	154752	-1.60328	-4.12171	5e-05	0.000105404	yes
XLOC_001649	XLOC_001649	TcSYL_0083270	TcX10_chr10:1015975-1016771	DCT	TM	OK	1523.57	695097	-1.13217	-4.12311	5e-05	0.000105404	yes
XLOC_011438	XLOC_011438	TcSYL_0165680	TcX10_chr34:456804-457096	DCT	TM	OK	280.23	151164	-4.21242	-4.12513	5e-05	0.000105404	yes
XLOC_000042	XLOC_000042	TcSYL_0001120	TcX10_chr1:416894-417537	DCT	TM	OK	534775	227112	-1.23553	-4.12658	5e-05	0.000105404	yes
XLOC_007438	XLOC_007438	TcSYL_0131840	TcX10_chr23:569551-569816	DCT	TM	OK	934092	268602	-1.7981	-4.12775	5e-05	0.000105404	yes
XLOC_014761	XLOC_014761	TcSYL_0043750	TcX10_chr4:1339979-1340274	DCT	TM	OK	1551.09	604203	-1.36018	-4.12814	5e-05	0.000105404	yes
XLOC_004158	XLOC_004158	TcSYL_0106870	TcX10_chr15:453187-454745	DCT	TM	OK	265696	118129	-1.16941	-4.13034	5e-05	0.000105404	yes
XLOC_011306	XLOC_011306	TcSYL_0163570	TcX10_chr33:381348-382045	DCT	TM	OK	320725	124035	-1.37059	-4.13253	5e-05	0.000105404	yes
XLOC_003943	XLOC_003943	TcSYL_0103820	TcX10_chr15:47512-48077	DCT	TM	OK	114063	18192	-2.64846	-4.13321	5e-05	0.000105404	yes
XLOC_004935	XLOC_004935	TcSYL_0114970	TcX10_chr18:740211-740521	DCT	TM	OK	750089	230361	-1.70316	-4.13887	5e-05	0.000105404	yes
XLOC_002379	XLOC_002379	TcSYL_0089560	TcX10_chr12:286265-287553	DCT	TM	OK	351203	156654	-1.16472	-4.13888	5e-05	0.000105404	yes
XLOC_016478	XLOC_016478	TcSYL_0200910	TcX10_chr44:175713-176548	DCT	TM	OK	642635	287231	-1.16179	-4.14364	5e-05	0.000105404	yes
XLOC_000683	XLOC_000683	TcSYL_0013470	TcX10_chr1:2516214-2516773	DCT	TM	OK	1538.47	701685	-1.1326	-4.14456	5e-05	0.000105404	yes
XLOC_011086	XLOC_011086	TcSYL_0162360	TcX10_chr33:276164-276501	DCT	TM	OK	309671	527431	-2.55368	-4.16292	5e-05	0.000105404	yes
XLOC_012247	XLOC_012247	TcSYL_0174470	TcX10_chr37:369133-369971	DCT	TM	OK	314602	127344	-1.3048	-4.17651	5e-05	0.000105404	yes
XLOC_002852	XLOC_002852	TcSYL_0095800	TcX10_chr13:544528-546242	DCT	TM	OK	125574	506551	-1.30976	-4.17736	5e-05	0.000105404	yes
XLOC_013080	XLOC_013080	TcSYL_0179170	TcX10_chr39:72403-72686	DCT	TM	OK	957895	299885	-1.67546	-4.18587	5e-05	0.000105404	yes
XLOC_012860	XLOC_012860	TcSYL_0180590	TcX10_chr39:211526-211770	DCT	TM	OK	702272	129237	-2.44201	-4.18785	5e-05	0.000105404	yes
XLOC_008635	XLOC_008635	TcSYL_0145710	TcX10_chr28:350064-350386	DCT	TM	OK	1510.96	609998	-1.30859	-4.18884	5e-05	0.000105404	yes
XLOC_012347	XLOC_012347	TcSYL_0173220	TcX10_chr37:222217-223925	DCT	TM	OK	645365	289676	-1.15568	-4.18972	5e-05	0.000105404	yes
XLOC_004018	XLOC_004018	TcSYL_0104780	TcX10_chr15:196776-197791	DCT	TM	OK	835323	197735	-2.07877	-4.19162	5e-05	0.000105404	yes
XLOC_000688	XLOC_000688	TcSYL_0013520	TcX10_chr1:2694484-2695361	DCT	TM	OK	226392	84826	-1.41625	-4.20118	5e-05	0.000105404	yes
XLOC_016563	XLOC_016563	TcSYL_0200800	TcX10_chr44:133089-133549	DCT	TM	OK	158314	227658	-2.79785	-4.21844	5e-05	0.000105404	yes
XLOC_016635	XLOC_016635	TcSYL_0202050	TcX10_chr45:111145-112715	DCT	TM	OK	152006	611239	-1.31432	-4.22712	5e-05	0.000105404	yes
XLOC_018456	XLOC_018456	TcSYL_0057210	TcX10_chr6:976498-977312	DCT	TM	OK	341729	137272	-1.31581	-4.23311	5e-05	0.000105404	yes
XLOC_014061	XLOC_014061	TcSYL_0044520	TcX10_chr4:1466653-1467317	DCT	TM	OK	230544	797339	-1.53178	-4.23352	5e-05	0.000105404	yes
XLOC_012915	XLOC_012915	TcSYL_0181430	TcX10_chr39:289237-289568	DCT	TM	OK	657727	204635	-1.68444	-4.23587	5e-05	0.000105404	yes
XLOC_004109	XLOC_004109	TcSYL_0106160	TcX10_chr15:315952-317048	DCT	TM	OK	82093	214141	-1.9387	-4.23867	5e-05	0.000105404	yes
XLOC_013230	XLOC_013230	TcSYL_0182550	TcX10_chr39:385688-386361	DCT	TM	OK	146892	37316	-1.97689	-4.24332	5e-05	0.000105404	yes
XLOC_014520	XLOC_014520	TcSYL_0040180	TcX10_chr4:984504-985183	DCT	TM	OK	726269	546573	-3.73202	-4.248	5e-05	0.000105404	yes
XLOC_002414	XLOC_002414	TcSYL_0090050	TcX10_chr12:319473-320089	DCT	TM	OK	154979	385218	-2.00832	-4.25069	5e-05	0.000105404	yes
XLOC_005192	XLOC_005192	TcSYL_0117530	TcX10_chr19:766270-766559	DCT	TM	OK	811763	233872	-1.79534	-4.25165	5e-05	0.000105404	yes
XLOC_009662	XLOC_009662	TcSYL_0027130	TcX10_chr3:1134874-1135742	DCT	TM	OK	542764	235585	-1.20407	-4.25314	5e-05	0.000105404	yes
XLOC_019856	XLOC_019856	TcSYL_0073420	TcX10_chr8:759441-760336	DCT	TM	OK	453772	192924	-1.23393	-4.25872	5e-05	0.000105404	yes
XLOC_010877	XLOC_010877	TcSYL_0158500	TcX10_chr32:509340-509560	DCT	TM	OK	1310.9	248419	-2.39971	-4.25982	5e-05	0.000105404	yes
XLOC_012670	XLOC_012670	TcSYL_0174920	TcX10_chr38:25856-26526	DCT	TM	OK	895028	129658	-2.78722	-4.26041	5e-05	0.000105404	yes
XLOC_016763	XLOC_016763	TcSYL_0203270	TcX10_chr46:254183-256239	DCT	TM	OK	719725	313751	-1.19783	-4.2607	5e-05	0.000105404	yes
XLOC_014769	XLOC_014769	TcSYL_0043840	TcX10_chr4:1344670-1344884	DCT	TM	OK	1418.17	264745	-2.42136	-4.26078	5e-05	0.000105404	yes
XLOC_011749	XLOC_011749	TcSYL_0167320	TcX10_chr35:362951-363471	DCT	TM	OK	250506	741422	-1.75648	-4.26639	5e-05	0.000105404	yes
XLOC_013127	XLOC_013127	TcSYL_0179770	TcX10_chr39:132766-133079	DCT	TM	OK	772245	235968	-1.71047	-4.2673	5e-05	0.000105404	yes
XLOC_004004	XLOC_004004	TcSYL_0104640	TcX10_chr15:176967-177865	DCT	TM	OK	324833	131494	-1.3047	-4.26828	5e-05	0.000105404	yes
XLOC_008673	XLOC_008673	TcSYL_0146380	TcX10_chr28:565793-566442	DCT	TM	OK	329548	120453	-1.45202	-4.26839	5e-05	0.000105404	yes
XLOC_004977	XLOC_004977	TcSYL_0115760	TcX10_chr19:463837-464123	DCT	TM	OK	1432.34	513692	-1.4794	-4.28121	5e-05	0.000105404	yes
XLOC_008954	XLOC_008954	TcSYL_0146610	TcX10_chr29:69566-70164	DCT	TM	OK	375503	138127	-1.44283	-4.28967	5e-05	0.000105404	yes
XLOC_012608	XLOC_012608	TcSYL_0177450	TcX10_chr38:353137-353507	DCT	TM	OK	540514	168711	-1.67978	-4.29062	5e-05	0.000105404	yes
XLOC_014069	XLOC_014069	TcSYL_0044630	TcX10_chr4:1482242-1483122	DCT	TM	OK	631048	274.29	-1.20205	-4.29325	5e-05	0.000105404	yes
XLOC_005858	XLOC_005858	TcSYL_0019420	TcX10_chr2:807169-807464	DCT	TM	OK	806258	240165	-1.74722	-4.31064	5e-05	0.000105404	yes
XLOC_020397	XLOC_020397	TcSYL_0075180	TcX10_chr9:307675-308225	DCT	TM	OK	506341	191824	-1.40032	-4.31319	5e-05	0.000105404	yes
XLOC_010861	XLOC_010861	TcSYL_0158240	TcX10_chr32:491898-492175	DCT	TM	OK	571.62	109812	-2.38002	-4.32227	5e-05	0.000105404	yes
XLOC_017492	XLOC_017492	TcSYL_0048370	TcX10_chr5:1104158-1105005	DCT	TM	OK	533477	225431	-1.24274	-4.33517	5e-05	0.000105404	yes
XLOC_020402	XLOC_020402	TcSYL_0075230	TcX10_chr9:335823-336709	DCT	TM	OK	215369	773158	-1.47798	-4.3421	5e-05	0.000105404	yes
XLOC_000563	XLOC_000563	TcSYL_0011510	TcX10_chr1:2323747-2323961	DCT	TM	OK	1827.46	405397	-2.17243	-4.3513	5e-05	0.000105404	yes
XLOC_004842	XLOC_004842	TcSYL_0114780	TcX10_chr18:678078-678499	DCT	TM	OK	623618	219533	-1.50623	-4.35179	5e-05	0.000105404	yes
XLOC_018457	XLOC_018457	TcSYL_0057220	TcX10_chr6:977721-977989	DCT	TM	OK	991469	268786	-1.88311	-4.35249	5e-05	0.000105404	yes
XLOC_000743	XLOC_000743	TcSYL_0014480	TcX10_chr1:3060355-3061238	DCT	TM	OK	303928	117926	-1.36585	-4.35279	5e-05	0.000105404	yes
XLOC_008670	XLOC_008670	TcSYL_0146350	TcX10_chr28:556279-556787	DCT	TM	OK	855836	348742	-1.29518	-4.35506	5e-05	0.000105404	yes
XLOC_005308	XLOC_005308	TcSYL_0016210	TcX10_chr2:402032-402462	DCT	TM	OK	668166	238991	-1.48325	-4.35891	5e-05	0.000105404	yes
XLOC_001994	XLOC_001994	TcSYL_0087080	TcX10_chr11:763588-763946	DCT	TM	OK	266291	382889	-2.798	-4.36866	5e-05	0.000105404	yes
XLOC_012607	XLOC_012607	TcSYL_0177440	TcX10_chr38:352367-353064	DCT	TM	OK	555032	229661	-1.27307	-4.37013	5e-05	0.000105404	yes
XLOC_018256	XLOC_018256	TcSYL_0053920	TcX10_chr6:682936-683315	DCT	TM	OK	204166	211767	-3.26919	-4.37377	5e-05	0.000105404	yes
XLOC_003709	XLOC_003709	TcSYL_0102170	TcX10_chr14:796282-796850	DCT	TM	OK	327363	107752	-1.60318	-4.3758	5e-05	0.000105404	yes
XLOC_012283	XLOC_012283	TcSYL_0174830	TcX10_chr37:477978-479767	DCT	TM	OK	249785	106464	-1.23032	-4.37909	5e-05	0.000105404	yes
XLOC_001449	XLOC_001449	TcSYL_0013870	TcX10_chr1:2849568-2849956	DCT	TM	OK	758222	267806	-1.50143	-4.38146	5e-05	0.000105404	yes
XLOC_009326	XLOC_009326	TcSYL_0027330	TcX10_chr3:1237176-1237915	DCT	TM	OK	758173	980937	-2.95029	-4.38439	5e-05	0.000105404	yes
XLOC_018169	XLOC_018169	TcSYL_0052710	TcX10_chr6:575875-576176	DCT	TM	OK	1242.03	418868	-1.56813	-4.38693	5e-05	0.000105404	yes
XLOC_016564	XLOC_016564	TcSYL_0200810	TcX10_chr44:135925-136319	DCT	TM	OK	766616	277988	-1.46348	-4.38762	5e-05	0.000105404	yes
XLOC_005071	XLOC_005071	TcSYL_0116000	TcX10_chr19:547387-548045	DCT	TM	OK	954752	404911	-1.23752	-4.39783	5e-05	0.000105404	yes
XLOC_001993	XLOC_001993	TcSYL_0087070	TcX10_chr11:763013-763368	DCT	TM	OK	256376	311251	-3.04211	-4.40578	5e-05	0.000105404	yes
XLOC_014028	XLOC_014028	TcSYL_0044150	TcX10_chr4:1418071-1418621	DCT	TM	OK	219182	571027	-1.9405	-4.40819	5e-05	0.000105404	yes
XLOC_008517	XLOC_008517	TcSYL_0142760	TcX10_chr27:342421-342959	DCT	TM	OK	8933.91	3441.53	-1.37624	-4.40984	5e-05	0.000105404	yes
XLOC_000706	XLOC_000706	TcSYL_0014110	TcX10_chr1:2949287-2950674	DCT	TM	OK	235576	947538	-1.31394	-4.41223	5e-05	0.000105404	yes
XLOC_000441	XLOC_000441	TcSYL_0009080	TcX10_chr1:1888949-1889271	DCT	TM	OK	1434.22	531732	-1.4315	-4.41935	5e-05	0.000105404	yes
XLOC_003228	XLOC_003228	TcSYL_0097050	TcX10_chr13:709126-709778	DCT	TM	OK	1153.6	496815	-1.21536	-4.41949	5e-05	0.000105404	yes
XLOC_003022	XLOC_003022	TcSYL_0093340	TcX10_chr13:181207-186014	DCT	TM	OK	392774	142583	-1.4619	-4.42117	5e-05	0.000105404	yes
XLOC_005030	XLOC_005030	TcSYL_0115080	TcX10_chr19:238660-239132	DCT	TM	OK	507369	177762	-1.51309	-4.42733	5e-05	0.000105404	yes
XLOC_012373	XLOC_012373	TcSYL_0173560	TcX10_chr37:255362-255981	DCT	TM	OK	885412	943722	-3.22992	-4.42978	5e-05	0.000105404	yes
XLOC_005837	XLOC_005837	TcSYL_0019210	TcX10_chr2:741899-743115	DCT	TM	OK	555946	238405	-1.22153	-4.44128	5e-05	0.000105404	yes
XLOC_001732	XLOC_001732	TcSYL_0082490	TcX10_chr10:731105-731592	DCT	TM	OK	774986	301.86	-1.36029	-4.44159	5e-05	0.000105404	yes
XLOC_002887	XLOC_002887	TcSYL_0096930	TcX10_chr13:700242-700606	DCT	TM	OK	568789	164616	-1.78879	-4.4422	5e-05	0.000105404	yes
XLOC_020283	XLOC_020283	TcSYL_0079360	TcX10_chr9:1024027-1024376	DCT	TM	OK	1144.01	423343	-1.4342	-4.44444	5e-05	0.000105404	yes
XLOC_004722	XLOC_004722	TcSYL_0112860	TcX10_chr18:115272-115558	DCT	TM	OK	868314	245138	-1.82462	-4.44682	5e-05	0.000105404	yes
XLOC_016630	XLOC_016630	TcSYL_0202000	TcX10_chr45:95816-96387	DCT	TM	OK	359826	122568	-1.55371	-4.45098	5e-05	0.000105404	yes
XLOC_005629	XLOC_005629	TcSYL_0022310	TcX10_chr2:1721892-1722223	DCT	TM	OK	3074.8	1296.57	-1.2458	-4.45239	5e-05	0.000105404	yes
XLOC_009056	XLOC_009056	TcSYL_0148340	TcX10_chr29:555314-556515	DCT	TM	OK	737665	17508	-2.07495	-4.45694	5e-05	0.000105404	yes
XLOC_010886	XLOC_010886	TcSYL_0158700	TcX10_chr32:520975-521294	DCT	TM	OK	582731	149369	-1.96395	-4.45776	5e-05	0.000105404	yes
XLOC_011335	XLOC_011335	TcSYL_0164150	TcX10_chr34:348878-349410	DCT	TM	OK	339261	107203	-1.66205	-4.45996	5e-05	0.000105404	yes
XLOC_008649	XLOC_008649	TcSYL_0145930	TcX10_chr28:362086-362312	DCT	TM	OK	1121.67	188245	-2.57497	-4.46191	5e-05	0.000105404	yes
XLOC_012932	XLOC_012932	TcSYL_0181650	TcX10_chr39:319748-319989	DCT	TM	OK	770538	105433	-2.86954	-4.46922	5e-05	0.000105404	yes
XLOC_000705	XLOC_000705	TcSYL_0014100	TcX10_chr1:2948445-2949028	DCT	TM	OK	302186	942357	-1.68109	-4.46962	5e-05	0.000105404	yes
XLOC_004542	XLOC_004542	TcSYL_0112550	TcX10_chr16:1448595-1449229	DCT	TM	OK	191413	508985	-1.91099	-4.47024	5e-05	0.000105404	yes
XLOC_002412	XLOC_002412	TcSYL_0090030	TcX10_chr12:317503-317825	DCT	TM	OK	405411	727607	-2.47815	-4.47278	5e-05	0.000105404	yes
XLOC_015548	XLOC_015548	TcSYL_0192110	TcX10_chr42:481165-481433	DCT	TM	OK	690754	127693	-2.43549	-4.4731	5e-05	0.000105404	yes
XLOC_004455	XLOC_004455	TcSYL_0111660	TcX10_chr16:1150200-1151110	DCT	TM	OK	186883	615761	-1.6017	-4.47459	5e-05	0.000105404	yes
XLOC_000843	XLOC_000843	TcSYL_0001510	TcX10_chr1:584571-585115	DCT	TM	OK	520515	190653	-1.44899	-4.47889	5e-05	0.000105404	yes
XLOC_007473	XLOC_007473	TcSYL_0132270	TcX10_chr23:594380-595152	DCT	TM	OK	338098	123751	-1.45	-4.48344	5e-05	0.000105404	yes
XLOC_016646	XLOC_016646	TcSYL_0202160	TcX10_chr45:142066-143009	DCT	TM	OK	188756	642914	-1.55382	-4.4926	5e-05	0.000105404	yes
XLOC_017165	XLOC_017165	TcSYL_0046650	TcX10_chr5:575583-576580	DCT	TM	OK	487855	202156	-1.27099	-4.49761	5e-05	0.000105404	yes
XLOC_011300	XLOC_011300	TcSYL_0163490	TcX10_chr33:338131-338471	DCT	TM	OK	482051	114.22	-2.07738	-4.49879	5e-05	0.000105404	yes
XLOC_005706	XLOC_005706	TcSYL_0016470	TcX10_chr2:417545-417765	DCT	TM	OK	987401	276578	-1.83595	-4.50376	5e-05	0.000105404	yes
XLOC_012837	XLOC_012837	TcSYL_0180140	TcX10_chr39:165986-166290	DCT	TM	OK	615031	144214	-2.09245	-4.50512	5e-05	0.000105404	yes
XLOC_016711	XLOC_016711	TcSYL_0202400	TcX10_chr45:214093-214715	DCT	TM	OK	411658	147718	-1.4786	-4.51466	5e-05	0.000105404	yes
XLOC_000828	XLOC_000828	TcSYL_0001050	TcX10_chr1:390386-390912	DCT	TM	OK	716398	277.31	-1.36926	-4.52103	5e-05	0.000105404	yes
XLOC_002909	XLOC_002909	TcSYL_0097860	TcX10_chr13:768612-768823	DCT	TM	OK	1651.04	267368	-2.62647	-4.52617	5e-05	0.000105404	yes
XLOC_010036	XLOC_010036	TcSYL_0153180	TcX10_chr30:368349-368605	DCT	TM	OK	764422	135329	-2.4979	-4.52891	5e-05	0.000105404	yes
XLOC_016628	XLOC_016628	TcSYL_0201980	TcX10_chr45:92468-93450	DCT	TM	OK	1107.06	465772	-1.24904	-4.53417	5e-05	0.000105404	yes
XLOC_000176	XLOC_000176	TcSYL_0003740	TcX10_chr1:1065972-1066810	DCT	TM	OK	431704	172073	-1.32703	-4.54179	5e-05	0.000105404	yes
XLOC_003744	XLOC_003744	TcSYL_0102740	TcX10_chr14:832706-833910	DCT	TM	OK	453973	368517	-3.6228	-4.54421	5e-05	0.000105404	yes
XLOC_005134	XLOC_005134	TcSYL_0116680	TcX10_chr19:702679-705569	DCT	TM	OK	161028	66466	-1.27662	-4.54937	5e-05	0.000105404	yes
XLOC_009669	XLOC_009669	TcSYL_0027200	TcX10_chr3:1162732-1163861	DCT	TM	OK	116228	341957	-1.76507	-4.55063	5e-05	0.000105404	yes
XLOC_011746	XLOC_011746	TcSYL_0167290	TcX10_chr35:352928-353565	DCT	TM	OK	416465	149.47	-1.47834	-4.55909	5e-05	0.000105404	yes
XLOC_008308	XLOC_008308	TcSYL_0139960	TcX10_chr26:342790-343109	DCT	TM	OK	3225.36	1326.24	-1.28212	-4.56384	5e-05	0.000105404	yes
XLOC_004665	XLOC_004665	TcSYL_0110910	TcX10_chr16:901323-901771	DCT	TM	OK	962964	369765	-1.38087	-4.56437	5e-05	0.000105404	yes
XLOC_006586	XLOC_006586	TcSYL_0122970	TcX10_chr21:464919-465484	DCT	TM	OK	551267	203247	-1.43951	-4.56971	5e-05	0.000105404	yes
XLOC_005849	XLOC_005849	TcSYL_0019330	TcX10_chr2:773152-774593	DCT	TM	OK	926184	280037	-1.72568	-4.5711	5e-05	0.000105404	yes
XLOC_020265	XLOC_020265	TcSYL_0079180	TcX10_chr9:971848-972722	DCT	TM	OK	124695	329499	-1.92005	-4.57368	5e-05	0.000105404	yes
XLOC_019896	XLOC_019896	TcSYL_0073820	TcX10_chr8:864571-864986	DCT	TM	OK	706493	240781	-1.55295	-4.57637	5e-05	0.000105404	yes
XLOC_000989	XLOC_000989	TcSYL_0005470	TcX10_chr1:1374329-1374537	DCT	TM	OK	2401.94	509.78	-2.23625	-4.57809	5e-05	0.000105404	yes
XLOC_011912	XLOC_011912	TcSYL_0170070	TcX10_chr36:254657-255303	DCT	TM	OK	733.9	293497	-1.32224	-4.58407	5e-05	0.000105404	yes
XLOC_002346	XLOC_002346	TcSYL_0089170	TcX10_chr12:121323-122281	DCT	TM	OK	363932	141156	-1.36638	-4.58417	5e-05	0.000105404	yes
XLOC_010864	XLOC_010864	TcSYL_0158270	TcX10_chr32:493194-493495	DCT	TM	OK	647002	153935	-2.07145	-4.58559	5e-05	0.000105404	yes
XLOC_009675	XLOC_009675	TcSYL_0027260	TcX10_chr3:1180192-1180853	DCT	TM	OK	290065	935312	-1.63286	-4.58689	5e-05	0.000105404	yes
XLOC_004463	XLOC_004463	TcSYL_0111740	TcX10_chr16:1177325-1178070	DCT	TM	OK	903937	373965	-1.27332	-4.58973	5e-05	0.000105404	yes
XLOC_010772	XLOC_010772	TcSYL_0159910	TcX10_chr32:904512-905314	DCT	TM	OK	185818	554885	-1.74363	-4.59128	5e-05	0.000105404	yes
XLOC_012081	XLOC_012081	TcSYL_0171440	TcX10_chr37:19456-20249	DCT	TM	OK	170159	498779	-1.77041	-4.59445	5e-05	0.000105404	yes
XLOC_003795	XLOC_003795	TcSYL_0103500	TcX10_chr14:888863-890361	DCT	TM	OK	1148.63	463.33	-1.30981	-4.59478	5e-05	0.000105404	yes
XLOC_000708	XLOC_000708	TcSYL_0014130	TcX10_chr1:2951334-2952670	DCT	TM	OK	281344	110085	-1.35372	-4.60039	5e-05	0.000105404	yes
XLOC_005335	XLOC_005335	TcSYL_0016720	TcX10_chr2:430874-432039	DCT	TM	OK	310056	120591	-1.36241	-4.60163	5e-05	0.000105404	yes
XLOC_009681	XLOC_009681	TcSYL_0027550	TcX10_chr3:1348217-1348449	DCT	TM	OK	3982.57	1394.76	-1.51368	-4.60531	5e-05	0.000105404	yes
XLOC_012362	XLOC_012362	TcSYL_0173420	TcX10_chr37:239628-240334	DCT	TM	OK	407447	154916	-1.39513	-4.61145	5e-05	0.000105404	yes
XLOC_019664	XLOC_019664	TcSYL_0069190	TcX10_chr7:1691615-1696350	DCT	TM	OK	367939	125539	-1.55134	-4.61659	5e-05	0.000105404	yes
XLOC_016638	XLOC_016638	TcSYL_0202080	TcX10_chr45:124447-125597	DCT	TM	OK	539539	220792	-1.28904	-4.62684	5e-05	0.000105404	yes
XLOC_004959	XLOC_004959	TcSYL_0115560	TcX10_chr19:418885-419609	DCT	TM	OK	1675.81	692441	-1.2751	-4.62698	5e-05	0.000105404	yes
XLOC_013081	XLOC_013081	TcSYL_0179180	TcX10_chr39:73874-74160	DCT	TM	OK	888408	229.41	-1.9533	-4.64358	5e-05	0.000105404	yes
XLOC_010663	XLOC_010663	TcSYL_0157580	TcX10_chr32:452500-452735	DCT	TM	OK	6037.85	2339.29	-1.36796	-4.64369	5e-05	0.000105404	yes
XLOC_002355	XLOC_002355	TcSYL_0089260	TcX10_chr12:149223-150367	DCT	TM	OK	564638	148063	-5.25304	-4.64505	5e-05	0.000105404	yes
XLOC_002205	XLOC_002205	TcSYL_0084280	TcX10_chr11:249879-250159	DCT	TM	OK	1706.68	577635	-1.56297	-4.64582	5e-05	0.000105404	yes
XLOC_002347	XLOC_002347	TcSYL_0089180	TcX10_chr12:122870-124587	DCT	TM	OK	610629	249.17	-1.29317	-4.65024	5e-05	0.000105404	yes
XLOC_017094	XLOC_017094	TcSYL_0045810	TcX10_chr5:330156-330361	DCT	TM	OK	1931.25	696907	-1.47049	-4.65644	5e-05	0.000105404	yes
XLOC_010800	XLOC_010800	TcSYL_0157260	TcX10_chr32:395794-396491	DCT	TM	OK	211524	585292	-1.85359	-4.6674	5e-05	0.000105404	yes
XLOC_018963	XLOC_018963	TcSYL_0066650	TcX10_chr7:1429016-1429719	DCT	TM	OK	159647	365843	-2.12559	-4.67006	5e-05	0.000105404	yes
XLOC_000198	XLOC_000198	TcSYL_0004100	TcX10_chr1:1097626-1097834	DCT	TM	OK	1781.27	240671	-2.88777	-4.68074	5e-05	0.000105404	yes
XLOC_018471	XLOC_018471	TcSYL_0057360	TcX10_chr6:1005059-1005990	DCT	TM	OK	264.01	928934	-1.50694	-4.68471	5e-05	0.000105404	yes
XLOC_006450	XLOC_006450	TcSYL_0123650	TcX10_chr21:608803-610232	DCT	TM	OK	249645	961794	-1.37608	-4.68533	5e-05	0.000105404	yes
XLOC_004507	XLOC_004507	TcSYL_0112190	TcX10_chr16:1319237-1319532	DCT	TM	OK	1458.89	478354	-1.60872	-4.68729	5e-05	0.000105404	yes
XLOC_016480	XLOC_016480	TcSYL_0200930	TcX10_chr44:183452-183948	DCT	TM	OK	269.29	593189	-2.1826	-4.69695	5e-05	0.000105404	yes
XLOC_012261	XLOC_012261	TcSYL_0174610	TcX10_chr37:412306-413555	DCT	TM	OK	767967	312771	-1.29594	-4.70887	5e-05	0.000105404	yes
XLOC_001428	XLOC_001428	TcSYL_0013660	TcX10_chr1:2747571-2748496	DCT	TM	OK	121921	292946	-2.05724	-4.71013	5e-05	0.000105404	yes
XLOC_016764	XLOC_016764	TcSYL_0203280	TcX10_chr46:259144-259868	DCT	TM	OK	636.22	248164	-1.35823	-4.71137	5e-05	0.000105404	yes
XLOC_010792	XLOC_010792	TcSYL_0157150	TcX10_chr32:3718-4406	DCT	TM	OK	343325	114939	-1.5787	-4.72186	5e-05	0.000105404	yes
XLOC_004733	XLOC_004733	TcSYL_0113470	TcX10_chr18:408710-409161	DCT	TM	OK	2341	943.44	-1.31112	-4.73763	5e-05	0.000105404	yes
XLOC_011744	XLOC_011744	TcSYL_0167270	TcX10_chr35:352045-352562	DCT	TM	OK	534866	180184	-1.56971	-4.74068	5e-05	0.000105404	yes
XLOC_014054	XLOC_014054	TcSYL_0044440	TcX10_chr4:1461672-1462915	DCT	TM	OK	404584	163574	-1.30649	-4.74365	5e-05	0.000105404	yes
XLOC_012914	XLOC_012914	TcSYL_0181420	TcX10_chr39:288082-288557	DCT	TM	OK	742662	261905	-1.50366	-4.74616	5e-05	0.000105404	yes
XLOC_016559	XLOC_016559	TcSYL_0200760	TcX10_chr44:113605-114299	DCT	TM	OK	226293	637531	-1.82762	-4.74839	5e-05	0.000105404	yes
XLOC_016484	XLOC_016484	TcSYL_0201000	TcX10_chr44:210012-210661	DCT	TM	OK	214795	56574	-1.92475	-4.75166	5e-05	0.000105404	yes
XLOC_000795	XLOC_000795	TcSYL_0000720	TcX10_chr1:284046-284344	DCT	TM	OK	2378.81	875586	-1.44192	-4.75652	5e-05	0.000105404	yes
XLOC_005038	XLOC_005038	TcSYL_0115170	TcX10_chr19:263368-264539	DCT	TM	OK	498717	199447	-1.32222	-4.76105	5e-05	0.000105404	yes
XLOC_012153	XLOC_012153	TcSYL_0172420	TcX10_chr37:161053-161345	DCT	TM	OK	717911	151.57	-2.24382	-4.76203	5e-05	0.000105404	yes
XLOC_016475	XLOC_016475	TcSYL_0200880	TcX10_chr44:168744-169351	DCT	TM	OK	286188	830575	-1.78478	-4.76464	5e-05	0.000105404	yes
XLOC_017580	XLOC_017580	TcSYL_0050080	TcX10_chr6:66425-66675	DCT	TM	OK	922852	152764	-2.5948	-4.77922	5e-05	0.000105404	yes
XLOC_011536	XLOC_011536	TcSYL_0164710	TcX10_chr34:392692-393095	DCT	TM	OK	229816	226762	-3.34123	-4.78628	5e-05	0.000105404	yes
XLOC_000704	XLOC_000704	TcSYL_0014090	TcX10_chr1:2947174-2947661	DCT	TM	OK	296628	709128	-2.06454	-4.79363	5e-05	0.000105404	yes
XLOC_017496	XLOC_017496	TcSYL_0048430	TcX10_chr5:1108829-1109130	DCT	TM	OK	723282	172936	-2.06432	-4.79414	5e-05	0.000105404	yes
XLOC_003117	XLOC_003117	TcSYL_0095040	TcX10_chr13:481283-481773	DCT	TM	OK	669778	227211	-1.55965	-4.79985	5e-05	0.000105404	yes
XLOC_008970	XLOC_008970	TcSYL_0146840	TcX10_chr29:88288-88949	DCT	TM	OK	135.24	18803	-2.84649	-4.80383	5e-05	0.000105404	yes
XLOC_004466	XLOC_004466	TcSYL_0111770	TcX10_chr16:1189010-1189221	DCT	TM	OK	2447.86	537602	-2.18691	-4.8063	5e-05	0.000105404	yes
XLOC_007224	XLOC_007224	TcSYL_0132920	TcX10_chr23:677757-678430	DCT	TM	OK	609607	227541	-1.42175	-4.80795	5e-05	0.000105404	yes
XLOC_016562	XLOC_016562	TcSYL_0200790	TcX10_chr44:130432-131012	DCT	TM	OK	615563	220104	-1.48372	-4.81313	5e-05	0.000105404	yes
XLOC_000741	XLOC_000741	TcSYL_0014460	TcX10_chr1:3054890-3057081	DCT	TM	OK	275333	109956	-1.32426	-4.81843	5e-05	0.000105404	yes
XLOC_008967	XLOC_008967	TcSYL_0146810	TcX10_chr29:86557-86879	DCT	TM	OK	375064	234755	-3.99791	-4.82036	5e-05	0.000105404	yes
XLOC_008391	XLOC_008391	TcSYL_0141690	TcX10_chr27:31393-31988	DCT	TM	OK	2866.44	1137.15	-1.33384	-4.82672	5e-05	0.000105404	yes
XLOC_004321	XLOC_004321	TcSYL_0108830	TcX10_chr15:900508-901193	DCT	TM	OK	118626	154171	-2.94382	-4.8332	5e-05	0.000105404	yes
XLOC_016631	XLOC_016631	TcSYL_0202010	TcX10_chr45:96466-97811	DCT	TM	OK	327502	125383	-1.38516	-4.84539	5e-05	0.000105404	yes
XLOC_001278	XLOC_001278	TcSYL_0010750	TcX10_chr1:2066039-2066415	DCT	TM	OK	1253.74	444777	-1.49509	-4.85645	5e-05	0.000105404	yes
XLOC_008066	XLOC_008066	TcSYL_0138510	TcX10_chr25:133022-133887	DCT	TM	OK	489788	183444	-1.41682	-4.85694	5e-05	0.000105404	yes
XLOC_011750	XLOC_011750	TcSYL_0167330	TcX10_chr35:365852-367287	DCT	TM	OK	301717	114342	-1.39983	-4.86386	5e-05	0.000105404	yes
XLOC_016565	XLOC_016565	TcSYL_0200820	TcX10_chr44:136455-138802	DCT	TM	OK	571389	223323	-1.35534	-4.87448	5e-05	0.000105404	yes
XLOC_016472	XLOC_016472	TcSYL_0200840	TcX10_chr44:157760-158232	DCT	TM	OK	444902	125396	-1.827	-4.87826	5e-05	0.000105404	yes
XLOC_002209	XLOC_002209	TcSYL_0084420	TcX10_chr11:306598-306872	DCT	TM	OK	1106.68	264276	-2.06612	-4.88034	5e-05	0.000105404	yes
XLOC_002664	XLOC_002664	TcSYL_0091910	TcX10_chr12:869986-870266	DCT	TM	OK	1775.65	547799	-1.69663	-4.88924	5e-05	0.000105404	yes
XLOC_016476	XLOC_016476	TcSYL_0200890	TcX10_chr44:171675-172483	DCT	TM	OK	529572	196957	-1.42695	-4.89049	5e-05	0.000105404	yes
XLOC_012430	XLOC_012430	TcSYL_0174950	TcX10_chr38:91397-92760	DCT	TM	OK	500222	195537	-1.35513	-4.91327	5e-05	0.000105404	yes
XLOC_015949	XLOC_015949	TcSYL_0195520	TcX10_chr43:67941-68191	DCT	TM	OK	2055.64	590816	-1.79881	-4.91435	5e-05	0.000105404	yes
XLOC_009255	XLOC_009255	TcSYL_0026110	TcX10_chr3:1014130-1014365	DCT	TM	OK	2295.87	628435	-1.86921	-4.91722	5e-05	0.000105404	yes
XLOC_014690	XLOC_014690	TcSYL_0042830	TcX10_chr4:1248413-1248696	DCT	TM	OK	1084.69	267271	-2.0209	-4.92058	5e-05	0.000105404	yes
XLOC_004162	XLOC_004162	TcSYL_0106910	TcX10_chr15:477877-478250	DCT	TM	OK	857.28	263.16	-1.70383	-4.92069	5e-05	0.000105404	yes
XLOC_015383	XLOC_015383	TcSYL_0187830	TcX10_chr41:154724-156432	DCT	TM	OK	144063	488649	-1.55983	-4.923	5e-05	0.000105404	yes
XLOC_004343	XLOC_004343	TcSYL_0109610	TcX10_chr16:348379-348593	DCT	TM	OK	1693.26	257957	-2.71461	-4.92552	5e-05	0.000105404	yes
XLOC_001822	XLOC_001822	TcSYL_0084700	TcX10_chr11:322840-324173	DCT	TM	OK	154.52	487549	-1.66418	-4.9422	5e-05	0.000105404	yes
XLOC_009024	XLOC_009024	TcSYL_0147460	TcX10_chr29:291235-292364	DCT	TM	OK	443456	168027	-1.4001	-4.94298	5e-05	0.000105404	yes
XLOC_004837	XLOC_004837	TcSYL_0114730	TcX10_chr18:657384-657616	DCT	TM	OK	1113.53	128613	-3.11403	-4.94708	5e-05	0.000105404	yes
XLOC_015222	XLOC_015222	TcSYL_0188710	TcX10_chr41:278382-278755	DCT	TM	OK	508166	117254	-2.11567	-4.97113	5e-05	0.000105404	yes
XLOC_005242	XLOC_005242	TcSYL_0015240	TcX10_chr2:289592-289890	DCT	TM	OK	1552.07	482661	-1.68511	-4.97629	5e-05	0.000105404	yes
XLOC_016485	XLOC_016485	TcSYL_0201010	TcX10_chr44:210692-210942	DCT	TM	OK	919429	128688	-2.83686	-4.97898	5e-05	0.000105404	yes
XLOC_008999	XLOC_008999	TcSYL_0147170	TcX10_chr29:112725-113299	DCT	TM	OK	1049.3	395821	-1.40651	-4.98029	5e-05	0.000105404	yes
XLOC_013355	XLOC_013355	TcSYL_0030650	TcX10_chr4:75305-76248	DCT	TM	OK	178152	503782	-1.82224	-4.98539	5e-05	0.000105404	yes
XLOC_007510	XLOC_007510	TcSYL_0132840	TcX10_chr23:642588-642904	DCT	TM	OK	13398.4	5119.64	-1.38794	-4.98542	5e-05	0.000105404	yes
XLOC_013203	XLOC_013203	TcSYL_0181830	TcX10_chr39:329074-329546	DCT	TM	OK	309601	680976	-2.18473	-4.98774	5e-05	0.000105404	yes
XLOC_020404	XLOC_020404	TcSYL_0075250	TcX10_chr9:347676-348328	DCT	TM	OK	1189.07	451168	-1.3981	-4.99678	5e-05	0.000105404	yes
XLOC_000202	XLOC_000202	TcSYL_0004140	TcX10_chr1:1103336-1103862	DCT	TM	OK	334884	865771	-1.95161	-4.99951	5e-05	0.000105404	yes
XLOC_012372	XLOC_012372	TcSYL_0173540	TcX10_chr37:252094-253406	DCT	TM	OK	225805	773494	-1.54562	-5.01092	5e-05	0.000105404	yes
XLOC_015375	XLOC_015375	TcSYL_0187750	TcX10_chr41:139759-140420	DCT	TM	OK	370787	115043	-1.68842	-5.01415	5e-05	0.000105404	yes
XLOC_001977	XLOC_001977	TcSYL_0086870	TcX10_chr11:733752-734431	DCT	TM	OK	181975	371421	-2.29261	-5.01916	5e-05	0.000105404	yes
XLOC_010802	XLOC_010802	TcSYL_0157280	TcX10_chr32:397543-397880	DCT	TM	OK	548723	771648	-6.15199	-5.0197	0.0002	0.000392633	yes
XLOC_005281	XLOC_005281	TcSYL_0015800	TcX10_chr2:374626-375140	DCT	TM	OK	8676.95	2987.08	-1.53845	-5.03363	5e-05	0.000105404	yes
XLOC_016755	XLOC_016755	TcSYL_0203190	TcX10_chr46:233499-234664	DCT	TM	OK	290646	101958	-1.51128	-5.03582	5e-05	0.000105404	yes
XLOC_011733	XLOC_011733	TcSYL_0167160	TcX10_chr35:324689-324945	DCT	TM	OK	1757.12	461385	-1.92917	-5.04271	5e-05	0.000105404	yes
XLOC_002383	XLOC_002383	TcSYL_0089620	TcX10_chr12:290151-290587	DCT	TM	OK	5241.01	1984.38	-1.40116	-5.04289	5e-05	0.000105404	yes
XLOC_017507	XLOC_017507	TcSYL_0048580	TcX10_chr5:1120810-1121012	DCT	TM	OK	1864.37	137856	-3.75745	-5.04943	5e-05	0.000105404	yes
XLOC_008401	XLOC_008401	TcSYL_0141790	TcX10_chr27:85262-85902	DCT	TM	OK	352007	105794	-1.73434	-5.05505	5e-05	0.000105404	yes
XLOC_004464	XLOC_004464	TcSYL_0111750	TcX10_chr16:1178146-1178867	DCT	TM	OK	864154	323632	-1.41693	-5.05654	5e-05	0.000105404	yes
XLOC_001724	XLOC_001724	TcSYL_0082410	TcX10_chr10:697592-698586	DCT	TM	OK	377.47	132978	-1.50517	-5.07174	5e-05	0.000105404	yes
XLOC_010625	XLOC_010625	TcSYL_0157050	TcX10_chr31:483297-484927	DCT	TM	OK	491548	582465	-3.07709	-5.07366	5e-05	0.000105404	yes
XLOC_014759	XLOC_014759	TcSYL_0043730	TcX10_chr4:1338800-1339137	DCT	TM	OK	10179.6	3821.63	-1.41342	-5.07599	5e-05	0.000105404	yes
XLOC_000439	XLOC_000439	TcSYL_0009060	TcX10_chr1:1879960-1881128	DCT	TM	OK	461186	171793	-1.42467	-5.07682	5e-05	0.000105404	yes
XLOC_004735	XLOC_004735	TcSYL_0113490	TcX10_chr18:410912-411138	DCT	TM	OK	4976.59	1596.01	-1.64069	-5.08173	5e-05	0.000105404	yes
XLOC_005039	XLOC_005039	TcSYL_0115180	TcX10_chr19:264846-265408	DCT	TM	OK	4864.71	1774.86	-1.45465	-5.08752	5e-05	0.000105404	yes
XLOC_002525	XLOC_002525	TcSYL_0091790	TcX10_chr12:585787-586610	DCT	TM	OK	700259	260	-1.42938	-5.08887	5e-05	0.000105404	yes
XLOC_008130	XLOC_008130	TcSYL_0139120	TcX10_chr26:24520-25010	DCT	TM	OK	235963	375773	-2.65063	-5.08894	5e-05	0.000105404	yes
XLOC_016497	XLOC_016497	TcSYL_0201210	TcX10_chr44:221667-221869	DCT	TM	OK	2230.07	238776	-3.22336	-5.08994	5e-05	0.000105404	yes
XLOC_005258	XLOC_005258	TcSYL_0015400	TcX10_chr2:346136-346701	DCT	TM	OK	279184	465575	-2.58413	-5.09565	5e-05	0.000105404	yes
XLOC_008657	XLOC_008657	TcSYL_0146010	TcX10_chr28:371374-371579	DCT	TM	OK	1804.85	859402	-4.3924	-5.09664	5e-05	0.000105404	yes
XLOC_011085	XLOC_011085	TcSYL_0162350	TcX10_chr33:275478-275965	DCT	TM	OK	278971	529643	-2.39702	-5.10364	5e-05	0.000105404	yes
XLOC_016586	XLOC_016586	TcSYL_0201390	TcX10_chr44:260343-261769	DCT	TM	OK	242458	821403	-1.56157	-5.10979	5e-05	0.000105404	yes
XLOC_001489	XLOC_001489	TcSYL_0080780	TcX10_chr10:344135-344373	DCT	TM	OK	890895	418546	-4.4118	-5.10993	5e-05	0.000105404	yes
XLOC_018468	XLOC_018468	TcSYL_0057330	TcX10_chr6:1001830-1002053	DCT	TM	OK	1480.31	187635	-2.9799	-5.11177	5e-05	0.000105404	yes
XLOC_001681	XLOC_001681	TcSYL_0080430	TcX10_chr10:178891-179348	DCT	TM	OK	2558.53	965709	-1.40566	-5.11229	5e-05	0.000105404	yes
XLOC_008194	XLOC_008194	TcSYL_0140720	TcX10_chr26:504111-504544	DCT	TM	OK	11106	3810.47	-1.5433	-5.11636	5e-05	0.000105404	yes
XLOC_005056	XLOC_005056	TcSYL_0115360	TcX10_chr19:304073-304806	DCT	TM	OK	298662	873644	-1.7734	-5.14999	5e-05	0.000105404	yes
XLOC_018263	XLOC_018263	TcSYL_0054000	TcX10_chr6:689786-690165	DCT	TM	OK	293079	223362	-3.71383	-5.15308	5e-05	0.000105404	yes
XLOC_007199	XLOC_007199	TcSYL_0132090	TcX10_chr23:584236-584447	DCT	TM	OK	2045.3	241289	-3.08348	-5.15433	5e-05	0.000105404	yes
XLOC_004951	XLOC_004951	TcSYL_0115480	TcX10_chr19:378048-378877	DCT	TM	OK	1136.87	426667	-1.41389	-5.16237	5e-05	0.000105404	yes
XLOC_019947	XLOC_019947	TcSYL_0074500	TcX10_chr8:1149298-1149911	DCT	TM	OK	188658	32553	-2.53491	-5.16259	5e-05	0.000105404	yes
XLOC_003251	XLOC_003251	TcSYL_0097300	TcX10_chr13:733983-735031	DCT	TM	OK	2203.4	785339	-1.48834	-5.17156	5e-05	0.000105404	yes
XLOC_007677	XLOC_007677	TcSYL_0136200	TcX10_chr24:271808-272265	DCT	TM	OK	390.18	88.17	-2.14578	-5.18699	5e-05	0.000105404	yes
XLOC_007214	XLOC_007214	TcSYL_0132660	TcX10_chr23:621612-621823	DCT	TM	OK	1827.05	216825	-3.07491	-5.19202	5e-05	0.000105404	yes
XLOC_000168	XLOC_000168	TcSYL_0003660	TcX10_chr1:1048749-1049251	DCT	TM	OK	268.34	430118	-2.64126	-5.20613	5e-05	0.000105404	yes
XLOC_010753	XLOC_010753	TcSYL_0159720	TcX10_chr32:818549-819345	DCT	TM	OK	127.13	199477	-2.67201	-5.22875	5e-05	0.000105404	yes
XLOC_017485	XLOC_017485	TcSYL_0048280	TcX10_chr5:1097895-1098754	DCT	TM	OK	199622	490704	-2.02435	-5.23206	5e-05	0.000105404	yes
XLOC_001940	XLOC_001940	TcSYL_0086390	TcX10_chr11:538380-538699	DCT	TM	OK	791502	177035	-2.16056	-5.23871	5e-05	0.000105404	yes
XLOC_007474	XLOC_007474	TcSYL_0132280	TcX10_chr23:595454-595986	DCT	TM	OK	618834	187434	-1.72317	-5.23884	5e-05	0.000105404	yes
XLOC_016597	XLOC_016597	TcSYL_0201500	TcX10_chr44:302574-303433	DCT	TM	OK	489425	168333	-1.53977	-5.24064	5e-05	0.000105404	yes
XLOC_003773	XLOC_003773	TcSYL_0103150	TcX10_chr14:856550-856803	DCT	TM	OK	1218.18	216539	-2.49203	-5.24493	5e-05	0.000105404	yes
XLOC_016644	XLOC_016644	TcSYL_0202140	TcX10_chr45:137737-138338	DCT	TM	OK	366.65	102728	-1.83558	-5.24761	5e-05	0.000105404	yes
XLOC_013051	XLOC_013051	TcSYL_0178780	TcX10_chr39:24840-26461	DCT	TM	OK	142711	432489	-1.72236	-5.2499	5e-05	0.000105404	yes
XLOC_012011	XLOC_012011	TcSYL_0171200	TcX10_chr36:498321-498640	DCT	TM	OK	5783.25	1979.88	-1.54647	-5.25086	5e-05	0.000105404	yes
XLOC_009487	XLOC_009487	TcSYL_0022680	TcX10_chr3:151200-151561	DCT	TM	OK	5555.6	2033.15	-1.45023	-5.25282	5e-05	0.000105404	yes
XLOC_009018	XLOC_009018	TcSYL_0147400	TcX10_chr29:269130-269368	DCT	TM	OK	1267.91	186532	-2.76495	-5.258	5e-05	0.000105404	yes
XLOC_002315	XLOC_002315	TcSYL_0088070	TcX10_chr11:866984-867414	DCT	TM	OK	509576	124678	-2.03109	-5.25838	5e-05	0.000105404	yes
XLOC_019800	XLOC_019800	TcSYL_0072200	TcX10_chr8:156878-157275	DCT	TM	OK	1475.13	445.04	-1.72884	-5.2655	5e-05	0.000105404	yes
XLOC_008630	XLOC_008630	TcSYL_0145610	TcX10_chr28:344364-344587	DCT	TM	OK	1535.53	220525	-2.79972	-5.27248	5e-05	0.000105404	yes
XLOC_012832	XLOC_012832	TcSYL_0180080	TcX10_chr39:160979-162387	DCT	TM	OK	663285	241426	-1.45805	-5.2745	5e-05	0.000105404	yes
XLOC_004952	XLOC_004952	TcSYL_0115490	TcX10_chr19:383700-384154	DCT	TM	OK	768.09	231.22	-1.73201	-5.28627	5e-05	0.000105404	yes
XLOC_000291	XLOC_000291	TcSYL_0005150	TcX10_chr1:1351514-1354353	DCT	TM	OK	874977	264707	-1.72485	-5.29794	5e-05	0.000105404	yes
XLOC_000820	XLOC_000820	TcSYL_0000970	TcX10_chr1:366001-366344	DCT	TM	OK	948666	250497	-1.9211	-5.30333	5e-05	0.000105404	yes
XLOC_012456	XLOC_012456	TcSYL_0175300	TcX10_chr38:152409-153694	DCT	TM	OK	3607.05	1055.24	-1.77325	-5.30739	5e-05	0.000105404	yes
XLOC_018466	XLOC_018466	TcSYL_0057310	TcX10_chr6:997841-998814	DCT	TM	OK	449.53	152502	-1.55959	-5.31308	5e-05	0.000105404	yes
XLOC_018434	XLOC_018434	TcSYL_0056860	TcX10_chr6:861715-862202	DCT	TM	OK	237431	269822	-3.13743	-5.31568	5e-05	0.000105404	yes
XLOC_002560	XLOC_002560	TcSYL_0092430	TcX10_chr12:1018463-1019622	DCT	TM	OK	324613	107857	-1.5896	-5.32469	5e-05	0.000105404	yes
XLOC_001992	XLOC_001992	TcSYL_0087060	TcX10_chr11:762724-762926	DCT	TM	OK	1983.8	704865	-4.81478	-5.3345	5e-05	0.000105404	yes
XLOC_005655	XLOC_005655	TcSYL_0014770	TcX10_chr2:43042-43298	DCT	TM	OK	1194.06	219317	-2.44479	-5.34162	5e-05	0.000105404	yes
XLOC_007496	XLOC_007496	TcSYL_0132600	TcX10_chr23:617683-617999	DCT	TM	OK	1007.39	238733	-2.07715	-5.34284	5e-05	0.000105404	yes
XLOC_004826	XLOC_004826	TcSYL_0114620	TcX10_chr18:615469-616277	DCT	TM	OK	167.75	327685	-2.35593	-5.37534	5e-05	0.000105404	yes
XLOC_001641	XLOC_001641	TcSYL_0083140	TcX10_chr10:998340-1001455	DCT	TM	OK	622264	174424	-1.83493	-5.37571	5e-05	0.000105404	yes
XLOC_015517	XLOC_015517	TcSYL_0191370	TcX10_chr42:285676-286025	DCT	TM	OK	566554	904941	-2.64632	-5.38454	5e-05	0.000105404	yes
XLOC_004572	XLOC_004572	TcSYL_0109230	TcX10_chr16:139936-140273	DCT	TM	OK	2717.95	929304	-1.5483	-5.39297	5e-05	0.000105404	yes
XLOC_011897	XLOC_011897	TcSYL_0169920	TcX10_chr36:208549-209654	DCT	TM	OK	255.41	777426	-1.71604	-5.40081	5e-05	0.000105404	yes
XLOC_016258	XLOC_016258	TcSYL_0196760	TcX10_chr43:156835-157214	DCT	TM	OK	718991	165266	-2.12119	-5.42077	5e-05	0.000105404	yes
XLOC_007514	XLOC_007514	TcSYL_0132880	TcX10_chr23:647278-647615	DCT	TM	OK	927674	228666	-2.02038	-5.4212	5e-05	0.000105404	yes
XLOC_011940	XLOC_011940	TcSYL_0170410	TcX10_chr36:346391-346707	DCT	TM	OK	3055.52	1037.36	-1.5585	-5.42823	5e-05	0.000105404	yes
XLOC_008135	XLOC_008135	TcSYL_0139170	TcX10_chr26:37690-39308	DCT	TM	OK	194259	610897	-1.66898	-5.44007	5e-05	0.000105404	yes
XLOC_012943	XLOC_012943	TcSYL_0181810	TcX10_chr39:328449-328759	DCT	TM	OK	556103	523908	-3.40797	-5.44805	5e-05	0.000105404	yes
XLOC_001828	XLOC_001828	TcSYL_0084820	TcX10_chr11:332296-333104	DCT	TM	OK	160126	321625	-2.31575	-5.46945	5e-05	0.000105404	yes
XLOC_017611	XLOC_017611	TcSYL_0050440	TcX10_chr6:148501-149156	DCT	TM	OK	149.75	136853	-3.45185	-5.47338	5e-05	0.000105404	yes
XLOC_012165	XLOC_012165	TcSYL_0172590	TcX10_chr37:169854-170926	DCT	TM	OK	296263	906761	-1.70808	-5.48012	5e-05	0.000105404	yes
XLOC_000825	XLOC_000825	TcSYL_0001020	TcX10_chr1:375666-376081	DCT	TM	OK	3558.01	1265.1	-1.49181	-5.49643	5e-05	0.000105404	yes
XLOC_002665	XLOC_002665	TcSYL_0091920	TcX10_chr12:870306-870736	DCT	TM	OK	1329.82	430259	-1.62795	-5.49834	5e-05	0.000105404	yes
XLOC_002356	XLOC_002356	TcSYL_0089270	TcX10_chr12:150494-151446	DCT	TM	OK	118493	216988	-5.77104	-5.50574	5e-05	0.000105404	yes
XLOC_005633	XLOC_005633	TcSYL_0022350	TcX10_chr2:1742543-1743369	DCT	TM	OK	341546	994492	-1.78005	-5.5067	5e-05	0.000105404	yes
XLOC_017415	XLOC_017415	TcSYL_0047560	TcX10_chr5:904507-904820	DCT	TM	OK	627844	828539	-2.92176	-5.51135	5e-05	0.000105404	yes
XLOC_008302	XLOC_008302	TcSYL_0139880	TcX10_chr26:326012-326364	DCT	TM	OK	1828.76	588263	-1.63633	-5.51195	5e-05	0.000105404	yes
XLOC_001823	XLOC_001823	TcSYL_0084710	TcX10_chr11:324273-325063	DCT	TM	OK	267.87	680809	-1.97621	-5.51596	5e-05	0.000105404	yes
XLOC_012887	XLOC_012887	TcSYL_0180910	TcX10_chr39:233652-235684	DCT	TM	OK	755638	176705	-2.09636	-5.53975	5e-05	0.000105404	yes
XLOC_000024	XLOC_000024	TcSYL_0000480	TcX10_chr1:133749-134095	DCT	TM	OK	6290.43	2138.26	-1.55672	-5.54633	5e-05	0.000105404	yes
XLOC_005854	XLOC_005854	TcSYL_0019380	TcX10_chr2:786468-787291	DCT	TM	OK	927.98	317788	-1.54603	-5.54735	5e-05	0.000105404	yes
XLOC_012203	XLOC_012203	TcSYL_0173230	TcX10_chr37:224224-224627	DCT	TM	OK	975212	275.85	-1.82183	-5.54906	5e-05	0.000105404	yes
XLOC_011305	XLOC_011305	TcSYL_0163560	TcX10_chr33:375081-375322	DCT	TM	OK	2822.77	703529	-2.00443	-5.55648	5e-05	0.000105404	yes
XLOC_003786	XLOC_003786	TcSYL_0103340	TcX10_chr14:868151-868548	DCT	TM	OK	1394.45	435317	-1.67956	-5.5593	5e-05	0.000105404	yes
XLOC_007378	XLOC_007378	TcSYL_0131100	TcX10_chr23:516648-516943	DCT	TM	OK	1122.64	241116	-2.2191	-5.56486	5e-05	0.000105404	yes
XLOC_014789	XLOC_014789	TcSYL_0044060	TcX10_chr4:1381514-1381788	DCT	TM	OK	1263.11	273751	-2.20604	-5.56987	5e-05	0.000105404	yes
XLOC_000553	XLOC_000553	TcSYL_0010650	TcX10_chr1:2021209-2021720	DCT	TM	OK	246224	28.08	-3.13236	-5.5744	5e-05	0.000105404	yes
XLOC_004473	XLOC_004473	TcSYL_0111840	TcX10_chr16:1214516-1214805	DCT	TM	OK	4233.71	1425.66	-1.5703	-5.57745	5e-05	0.000105404	yes
XLOC_017422	XLOC_017422	TcSYL_0047630	TcX10_chr5:919995-921019	DCT	TM	OK	442094	140869	-1.65	-5.62204	5e-05	0.000105404	yes
XLOC_019898	XLOC_019898	TcSYL_0073840	TcX10_chr8:866088-866398	DCT	TM	OK	1486.63	399548	-1.8956	-5.62319	5e-05	0.000105404	yes
XLOC_012384	XLOC_012384	TcSYL_0173820	TcX10_chr37:283520-284373	DCT	TM	OK	364698	104673	-1.80081	-5.63856	5e-05	0.000105404	yes
XLOC_002413	XLOC_002413	TcSYL_0090040	TcX10_chr12:317919-319363	DCT	TM	OK	176215	489193	-1.84886	-5.64139	5e-05	0.000105404	yes
XLOC_011901	XLOC_011901	TcSYL_0169960	TcX10_chr36:222054-222397	DCT	TM	OK	453.75	289367	-3.97093	-5.64993	5e-05	0.000105404	yes
XLOC_018453	XLOC_018453	TcSYL_0057180	TcX10_chr6:966330-968293	DCT	TM	OK	102.08	275186	-1.89123	-5.65345	5e-05	0.000105404	yes
XLOC_004475	XLOC_004475	TcSYL_0111860	TcX10_chr16:1218336-1218616	DCT	TM	OK	1742.7	440.52	-1.98405	-5.67376	5e-05	0.000105404	yes
XLOC_017336	XLOC_017336	TcSYL_0045080	TcX10_chr5:100514-101370	DCT	TM	OK	1410.75	477833	-1.56188	-5.68369	5e-05	0.000105404	yes
XLOC_015462	XLOC_015462	TcSYL_0190200	TcX10_chr41:393391-393911	DCT	TM	OK	424443	91897	-2.20748	-5.68569	5e-05	0.000105404	yes
XLOC_004769	XLOC_004769	TcSYL_0113920	TcX10_chr18:479064-479572	DCT	TM	OK	596511	153696	-1.95647	-5.68759	5e-05	0.000105404	yes
XLOC_016507	XLOC_016507	TcSYL_0201320	TcX10_chr44:237002-238137	DCT	TM	OK	362826	111665	-1.7001	-5.68983	5e-05	0.000105404	yes
XLOC_016560	XLOC_016560	TcSYL_0200770	TcX10_chr44:115133-115563	DCT	TM	OK	389576	60423	-2.68873	-5.69529	5e-05	0.000105404	yes
XLOC_015426	XLOC_015426	TcSYL_0189280	TcX10_chr41:317326-317720	DCT	TM	OK	1331.54	392983	-1.76055	-5.70128	5e-05	0.000105404	yes
XLOC_020247	XLOC_020247	TcSYL_0078960	TcX10_chr9:924248-924606	DCT	TM	OK	1919.46	588541	-1.70548	-5.72818	5e-05	0.000105404	yes
XLOC_015802	XLOC_015802	TcSYL_0192610	TcX10_chr42:544558-546404	DCT	TM	OK	511304	476586	-3.42337	-5.73052	5e-05	0.000105404	yes
XLOC_004803	XLOC_004803	TcSYL_0114280	TcX10_chr18:556318-556721	DCT	TM	OK	19874.7	5487.96	-1.85659	-5.7422	5e-05	0.000105404	yes
XLOC_006213	XLOC_006213	TcSYL_0121280	TcX10_chr20:578469-578680	DCT	TM	OK	6194.8	1540.29	-2.00786	-5.75817	5e-05	0.000105404	yes
XLOC_001203	XLOC_001203	TcSYL_0008760	TcX10_chr1:1813745-1814292	DCT	TM	OK	409933	936623	-2.12985	-5.75833	5e-05	0.000105404	yes
XLOC_000831	XLOC_000831	TcSYL_0001390	TcX10_chr1:558772-559019	DCT	TM	OK	12496	4254.41	-1.55444	-5.76926	5e-05	0.000105404	yes
XLOC_016709	XLOC_016709	TcSYL_0202380	TcX10_chr45:205896-208690	DCT	TM	OK	589.39	187802	-1.65001	-5.77188	5e-05	0.000105404	yes
XLOC_001979	XLOC_001979	TcSYL_0086890	TcX10_chr11:736158-736627	DCT	TM	OK	331435	44.13	-2.90889	-5.78084	5e-05	0.000105404	yes
XLOC_001829	XLOC_001829	TcSYL_0084830	TcX10_chr11:338548-339302	DCT	TM	OK	1099.68	360841	-1.60764	-5.79094	5e-05	0.000105404	yes
XLOC_000697	XLOC_000697	TcSYL_0013610	TcX10_chr1:2723494-2724620	DCT	TM	OK	670244	218474	-1.61722	-5.80948	5e-05	0.000105404	yes
XLOC_016596	XLOC_016596	TcSYL_0201490	TcX10_chr44:301009-301442	DCT	TM	OK	1044.18	292499	-1.83587	-5.81038	5e-05	0.000105404	yes
XLOC_002202	XLOC_002202	TcSYL_0084250	TcX10_chr11:239979-240304	DCT	TM	OK	817	133272	-2.61596	-5.81803	5e-05	0.000105404	yes
XLOC_002350	XLOC_002350	TcSYL_0089210	TcX10_chr12:129127-129563	DCT	TM	OK	479817	932113	-2.36391	-5.84691	5e-05	0.000105404	yes
XLOC_014701	XLOC_014701	TcSYL_0043010	TcX10_chr4:1277557-1278281	DCT	TM	OK	3195.46	1012.1	-1.65868	-5.85671	5e-05	0.000105404	yes
XLOC_004506	XLOC_004506	TcSYL_0112180	TcX10_chr16:1317366-1317919	DCT	TM	OK	421109	943023	-2.15883	-5.85865	5e-05	0.000105404	yes
XLOC_001964	XLOC_001964	TcSYL_0086640	TcX10_chr11:609224-609426	DCT	TM	OK	5159.24	1029.7	-2.32493	-5.87588	5e-05	0.000105404	yes
XLOC_012937	XLOC_012937	TcSYL_0181740	TcX10_chr39:324201-324427	DCT	TM	OK	2758.55	511.66	-2.43066	-5.87759	5e-05	0.000105404	yes
XLOC_012435	XLOC_012435	TcSYL_0175000	TcX10_chr38:123335-124545	DCT	TM	OK	793181	257708	-1.62191	-5.88141	5e-05	0.000105404	yes
XLOC_006588	XLOC_006588	TcSYL_0122990	TcX10_chr21:475794-476413	DCT	TM	OK	1242.94	393581	-1.65902	-5.88986	5e-05	0.000105404	yes
XLOC_017092	XLOC_017092	TcSYL_0045790	TcX10_chr5:327032-327708	DCT	TM	OK	2013.13	654522	-1.62092	-5.89572	5e-05	0.000105404	yes
XLOC_016766	XLOC_016766	TcSYL_0203300	TcX10_chr46:261010-261791	DCT	TM	OK	4354.86	1255.55	-1.79431	-5.9011	5e-05	0.000105404	yes
XLOC_019910	XLOC_019910	TcSYL_0073960	TcX10_chr8:893804-894741	DCT	TM	OK	507789	152544	-1.735	-5.9188	5e-05	0.000105404	yes
XLOC_012605	XLOC_012605	TcSYL_0177410	TcX10_chr38:351157-351443	DCT	TM	OK	1115.34	183051	-2.60717	-5.93866	5e-05	0.000105404	yes
XLOC_010600	XLOC_010600	TcSYL_0156740	TcX10_chr31:417897-418156	DCT	TM	OK	4570.34	1338.32	-1.77188	-5.95336	5e-05	0.000105404	yes
XLOC_009265	XLOC_009265	TcSYL_0026270	TcX10_chr3:1023817-1024841	DCT	TM	OK	166.32	309253	-2.42711	-5.96066	5e-05	0.000105404	yes
XLOC_010547	XLOC_010547	TcSYL_0156080	TcX10_chr31:119107-119936	DCT	TM	OK	571741	169501	-1.75407	-5.96561	5e-05	0.000105404	yes
XLOC_012364	XLOC_012364	TcSYL_0173450	TcX10_chr37:241167-241513	DCT	TM	OK	593808	858254	-2.79052	-5.96815	5e-05	0.000105404	yes
XLOC_001205	XLOC_001205	TcSYL_0008780	TcX10_chr1:1816883-1817595	DCT	TM	OK	175273	163723	-3.42028	-5.97983	5e-05	0.000105404	yes
XLOC_001490	XLOC_001490	TcSYL_0080790	TcX10_chr10:347564-347775	DCT	TM	OK	2198.45	596057	-5.20489	-6.00617	5e-05	0.000105404	yes
XLOC_005065	XLOC_005065	TcSYL_0115940	TcX10_chr19:522505-523370	DCT	TM	OK	285.18	67919	-2.06998	-6.02132	5e-05	0.000105404	yes
XLOC_019851	XLOC_019851	TcSYL_0073360	TcX10_chr8:321273-321478	DCT	TM	OK	4379.27	747744	-2.55007	-6.03182	5e-05	0.000105404	yes
XLOC_004307	XLOC_004307	TcSYL_0108690	TcX10_chr15:863946-864466	DCT	TM	OK	515818	113667	-2.18205	-6.04137	5e-05	0.000105404	yes
XLOC_012253	XLOC_012253	TcSYL_0174530	TcX10_chr37:389964-390628	DCT	TM	OK	792155	232017	-1.77155	-6.04896	5e-05	0.000105404	yes
XLOC_002674	XLOC_002674	TcSYL_0092010	TcX10_chr12:901148-901446	DCT	TM	OK	2430.11	649458	-1.90371	-6.06558	5e-05	0.000105404	yes
XLOC_016553	XLOC_016553	TcSYL_0200700	TcX10_chr44:98806-99239	DCT	TM	OK	1069.92	274463	-1.96282	-6.07421	5e-05	0.000105404	yes
XLOC_017362	XLOC_017362	TcSYL_0045350	TcX10_chr5:232314-232645	DCT	TM	OK	8961.93	2829.75	-1.66314	-6.07465	5e-05	0.000105404	yes
XLOC_002221	XLOC_002221	TcSYL_0084730	TcX10_chr11:325477-325760	DCT	TM	OK	938593	94637	-3.31002	-6.09113	5e-05	0.000105404	yes
XLOC_016717	XLOC_016717	TcSYL_0202460	TcX10_chr45:226676-227631	DCT	TM	OK	627237	186946	-1.74639	-6.0956	5e-05	0.000105404	yes
XLOC_019952	XLOC_019952	TcSYL_0072220	TcX10_chr8:157949-158202	DCT	TM	OK	5011.49	1412.76	-1.82672	-6.10397	5e-05	0.000105404	yes
XLOC_020270	XLOC_020270	TcSYL_0079230	TcX10_chr9:986125-986723	DCT	TM	OK	1108.92	329504	-1.75079	-6.10798	5e-05	0.000105404	yes
XLOC_011087	XLOC_011087	TcSYL_0162370	TcX10_chr33:276734-277428	DCT	TM	OK	286617	552131	-2.37604	-6.12456	5e-05	0.000105404	yes
XLOC_015395	XLOC_015395	TcSYL_0188060	TcX10_chr41:222842-224823	DCT	TM	OK	715687	216.45	-1.72529	-6.13236	5e-05	0.000105404	yes
XLOC_000147	XLOC_000147	TcSYL_0003040	TcX10_chr1:876425-876645	DCT	TM	OK	3672.88	707138	-2.37685	-6.13361	5e-05	0.000105404	yes
XLOC_017486	XLOC_017486	TcSYL_0048290	TcX10_chr5:1098866-1099146	DCT	TM	OK	914638	563255	-4.02134	-6.13894	5e-05	0.000105404	yes
XLOC_003261	XLOC_003261	TcSYL_0097410	TcX10_chr13:742012-742250	DCT	TM	OK	1901.02	277212	-2.77772	-6.14567	5e-05	0.000105404	yes
XLOC_012210	XLOC_012210	TcSYL_0173550	TcX10_chr37:255015-255280	DCT	TM	OK	1061.37	858491	-3.62798	-6.14777	5e-05	0.000105404	yes
XLOC_012260	XLOC_012260	TcSYL_0174600	TcX10_chr37:411890-412209	DCT	TM	OK	1676.99	402118	-2.06018	-6.19518	5e-05	0.000105404	yes
XLOC_004521	XLOC_004521	TcSYL_0112330	TcX10_chr16:1373087-1373796	DCT	TM	OK	222053	272769	-3.02515	-6.20629	5e-05	0.000105404	yes
XLOC_010648	XLOC_010648	TcSYL_0156770	TcX10_chr31:424822-425651	DCT	TM	OK	172928	155016	-3.47968	-6.21548	5e-05	0.000105404	yes
XLOC_012913	XLOC_012913	TcSYL_0181410	TcX10_chr39:286684-286958	DCT	TM	OK	4243.29	1211.21	-1.80874	-6.2194	5e-05	0.000105404	yes
XLOC_016595	XLOC_016595	TcSYL_0201480	TcX10_chr44:297039-297697	DCT	TM	OK	842.53	235148	-1.84116	-6.23839	5e-05	0.000105404	yes
XLOC_001981	XLOC_001981	TcSYL_0086910	TcX10_chr11:739470-740173	DCT	TM	OK	360963	792077	-2.18814	-6.25335	5e-05	0.000105404	yes
XLOC_012466	XLOC_012466	TcSYL_0175430	TcX10_chr38:163847-164730	DCT	TM	OK	209317	37395	-2.48477	-6.2624	5e-05	0.000105404	yes
XLOC_005652	XLOC_005652	TcSYL_0014740	TcX10_chr2:33797-34857	DCT	TM	OK	285172	67376	-2.08153	-6.28325	5e-05	0.000105404	yes
XLOC_005090	XLOC_005090	TcSYL_0116190	TcX10_chr19:605313-605737	DCT	TM	OK	2042.46	591768	-1.7872	-6.28994	5e-05	0.000105404	yes
XLOC_009664	XLOC_009664	TcSYL_0027150	TcX10_chr3:1139050-1139951	DCT	TM	OK	506201	137848	-1.87663	-6.29262	5e-05	0.000105404	yes
XLOC_011289	XLOC_011289	TcSYL_0163330	TcX10_chr33:330210-330766	DCT	TM	OK	540754	113251	-2.25545	-6.29592	5e-05	0.000105404	yes
XLOC_008065	XLOC_008065	TcSYL_0138500	TcX10_chr25:129973-130925	DCT	TM	OK	137596	101503	-3.76084	-6.34501	5e-05	0.000105404	yes
XLOC_014704	XLOC_014704	TcSYL_0043040	TcX10_chr4:1282436-1282824	DCT	TM	OK	2878.28	831555	-1.79132	-6.35218	5e-05	0.000105404	yes
XLOC_019948	XLOC_019948	TcSYL_0074510	TcX10_chr8:1150147-1150490	DCT	TM	OK	1611.16	375924	-2.09959	-6.3851	5e-05	0.000105404	yes
XLOC_017626	XLOC_017626	TcSYL_0050640	TcX10_chr6:183607-184418	DCT	TM	OK	274516	535057	-2.35913	-6.38766	5e-05	0.000105404	yes
XLOC_015993	XLOC_015993	TcSYL_0196090	TcX10_chr43:102683-103140	DCT	TM	OK	1340.46	358012	-1.90465	-6.38944	5e-05	0.000105404	yes
XLOC_001291	XLOC_001291	TcSYL_0010880	TcX10_chr1:2112963-2113528	DCT	TM	OK	1367.98	390986	-1.80686	-6.40011	5e-05	0.000105404	yes
XLOC_019874	XLOC_019874	TcSYL_0073600	TcX10_chr8:815831-816069	DCT	TM	OK	2464.17	391016	-2.6558	-6.40126	5e-05	0.000105404	yes
XLOC_016477	XLOC_016477	TcSYL_0200900	TcX10_chr44:173294-175080	DCT	TM	OK	614.21	178983	-1.77891	-6.40382	5e-05	0.000105404	yes
XLOC_015523	XLOC_015523	TcSYL_0191690	TcX10_chr42:434247-434938	DCT	TM	OK	5531.22	1453.69	-1.92788	-6.41448	5e-05	0.000105404	yes
XLOC_016626	XLOC_016626	TcSYL_0201960	TcX10_chr45:89952-90499	DCT	TM	OK	1644.41	471234	-1.80306	-6.4238	5e-05	0.000105404	yes
XLOC_012280	XLOC_012280	TcSYL_0174800	TcX10_chr37:468781-469211	DCT	TM	OK	797.24	163.55	-2.28528	-6.42779	5e-05	0.000105404	yes
XLOC_012224	XLOC_012224	TcSYL_0173770	TcX10_chr37:280741-281168	DCT	TM	OK	1878.92	517233	-1.86102	-6.43795	5e-05	0.000105404	yes
XLOC_010767	XLOC_010767	TcSYL_0159860	TcX10_chr32:895224-895426	DCT	TM	OK	4346.83	556402	-2.96576	-6.45313	5e-05	0.000105404	yes
XLOC_020364	XLOC_020364	TcSYL_0074850	TcX10_chr9:176215-176957	DCT	TM	OK	810816	216214	-1.90692	-6.48204	5e-05	0.000105404	yes
XLOC_000227	XLOC_000227	TcSYL_0004390	TcX10_chr1:1167678-1168384	DCT	TM	OK	1228.85	350628	-1.8093	-6.49157	5e-05	0.000105404	yes
XLOC_003787	XLOC_003787	TcSYL_0103350	TcX10_chr14:868612-869792	DCT	TM	OK	1095.58	311371	-1.81498	-6.5235	5e-05	0.000105404	yes
XLOC_016598	XLOC_016598	TcSYL_0201510	TcX10_chr44:307852-308564	DCT	TM	OK	526227	123.42	-2.09211	-6.52457	5e-05	0.000105404	yes
XLOC_001991	XLOC_001991	TcSYL_0087050	TcX10_chr11:761251-762620	DCT	TM	OK	119329	176836	-2.75446	-6.54192	5e-05	0.000105404	yes
XLOC_004778	XLOC_004778	TcSYL_0114010	TcX10_chr18:504701-505203	DCT	TM	OK	1811.81	479458	-1.91795	-6.55244	5e-05	0.000105404	yes
XLOC_004805	XLOC_004805	TcSYL_0114300	TcX10_chr18:558044-558273	DCT	TM	OK	3610.88	580121	-2.63792	-6.55389	5e-05	0.000105404	yes
XLOC_017514	XLOC_017514	TcSYL_0048650	TcX10_chr5:1143614-1144227	DCT	TM	OK	796028	200816	-1.98695	-6.55586	5e-05	0.000105404	yes
XLOC_008083	XLOC_008083	TcSYL_0138680	TcX10_chr25:191499-191770	DCT	TM	OK	2823.45	634283	-2.15426	-6.56375	5e-05	0.000105404	yes
XLOC_004835	XLOC_004835	TcSYL_0114710	TcX10_chr18:653826-654622	DCT	TM	OK	892831	243074	-1.87699	-6.59547	5e-05	0.000105404	yes
XLOC_011906	XLOC_011906	TcSYL_0170010	TcX10_chr36:237143-237648	DCT	TM	OK	887.57	205913	-2.10783	-6.61643	5e-05	0.000105404	yes
XLOC_010601	XLOC_010601	TcSYL_0156750	TcX10_chr31:419349-420340	DCT	TM	OK	410554	993448	-2.04705	-6.62473	5e-05	0.000105404	yes
XLOC_012831	XLOC_012831	TcSYL_0180070	TcX10_chr39:160738-160952	DCT	TM	OK	2851.8	253686	-3.49076	-6.64305	5e-05	0.000105404	yes
XLOC_012204	XLOC_012204	TcSYL_0173240	TcX10_chr37:224703-225277	DCT	TM	OK	1101.59	285694	-1.94704	-6.64855	5e-05	0.000105404	yes
XLOC_016637	XLOC_016637	TcSYL_0202070	TcX10_chr45:121215-122506	DCT	TM	OK	471136	125122	-1.91281	-6.66248	5e-05	0.000105404	yes
XLOC_012667	XLOC_012667	TcSYL_0178370	TcX10_chr38:483350-483906	DCT	TM	OK	360391	493297	-2.86903	-6.66925	5e-05	0.000105404	yes
XLOC_012254	XLOC_012254	TcSYL_0174540	TcX10_chr37:392571-393259	DCT	TM	OK	510009	111762	-2.19009	-6.67568	5e-05	0.000105404	yes
XLOC_004770	XLOC_004770	TcSYL_0113930	TcX10_chr18:486017-486327	DCT	TM	OK	5135.6	1406.93	-1.86799	-6.71294	5e-05	0.000105404	yes
XLOC_016759	XLOC_016759	TcSYL_0203230	TcX10_chr46:247829-248304	DCT	TM	OK	1802.05	465533	-1.95268	-6.73547	5e-05	0.000105404	yes
XLOC_010820	XLOC_010820	TcSYL_0157470	TcX10_chr32:446426-446772	DCT	TM	OK	3891.87	1056.43	-1.88127	-6.74022	5e-05	0.000105404	yes
XLOC_013878	XLOC_013878	TcSYL_0039300	TcX10_chr4:803237-803793	DCT	TM	OK	437911	168158	-4.70275	-6.74715	5e-05	0.000105404	yes
XLOC_001774	XLOC_001774	TcSYL_0083000	TcX10_chr10:935651-936114	DCT	TM	OK	5621.29	1503.03	-1.90303	-6.75522	5e-05	0.000105404	yes
XLOC_008199	XLOC_008199	TcSYL_0140770	TcX10_chr26:511946-512559	DCT	TM	OK	1757.36	447713	-1.97277	-6.75761	5e-05	0.000105404	yes
XLOC_008406	XLOC_008406	TcSYL_0141840	TcX10_chr27:103434-104521	DCT	TM	OK	253179	505912	-2.3232	-6.78004	5e-05	0.000105404	yes
XLOC_012263	XLOC_012263	TcSYL_0174630	TcX10_chr37:420644-421089	DCT	TM	OK	525215	647746	-3.01941	-6.8042	5e-05	0.000105404	yes
XLOC_010546	XLOC_010546	TcSYL_0156070	TcX10_chr31:117862-118736	DCT	TM	OK	751861	192448	-1.966	-6.80908	5e-05	0.000105404	yes
XLOC_010866	XLOC_010866	TcSYL_0158330	TcX10_chr32:497849-498150	DCT	TM	OK	1030.81	79659	-3.6938	-6.81674	5e-05	0.000105404	yes
XLOC_016474	XLOC_016474	TcSYL_0200860	TcX10_chr44:166985-167433	DCT	TM	OK	1746.85	440729	-1.98679	-6.82853	5e-05	0.000105404	yes
[truncated: 109 more rows]

## Sheet: UP-DCT
test_id	gene_id	gene	locus	sample_1	sample_2	status	value_1	value_2	log2(fold_change)	test_stat	p_value	q_value	significant
XLOC_006416	XLOC_006416	TcSYL_0123260	TcX10_chr21:540696-541105	DCT	TM	OK	166557	333009	0.999541	2.50444	5e-05	0.000105404	yes
XLOC_004961	XLOC_004961	TcSYL_0115580	TcX10_chr19:424871-425256	DCT	TM	OK	321423	642239	0.998635	2.80376	5e-05	0.000105404	yes
XLOC_008332	XLOC_008332	TcSYL_0140230	TcX10_chr26:399337-400685	DCT	TM	OK	412224	823533	0.998398	2.73648	5e-05	0.000105404	yes
XLOC_009349	XLOC_009349	TcSYL_0027590	TcX10_chr3:1363140-1363696	DCT	TM	OK	185046	369547	0.997875	2.99996	5e-05	0.000105404	yes
XLOC_000353	XLOC_000353	TcSYL_0005970	TcX10_chr1:1409315-1410180	DCT	TM	OK	567486	113.15	0.995578	2.55592	5e-05	0.000105404	yes
XLOC_015757	XLOC_015757	TcSYL_0191600	TcX10_chr42:406954-407876	DCT	TM	OK	136246	271294	0.99364	3.22591	5e-05	0.000105404	yes
XLOC_009508	XLOC_009508	TcSYL_0022890	TcX10_chr3:213705-215053	DCT	TM	OK	173098	343752	0.989774	3.5426	5e-05	0.000105404	yes
XLOC_008636	XLOC_008636	TcSYL_0145720	TcX10_chr28:350471-351018	DCT	TM	OK	171559	340561	0.989209	2.85592	5e-05	0.000105404	yes
XLOC_018880	XLOC_018880	TcSYL_0064880	TcX10_chr7:1125996-1126669	DCT	TM	OK	103763	205962	0.989085	2.7309	5e-05	0.000105404	yes
XLOC_020121	XLOC_020121	TcSYL_0077280	TcX10_chr9:668149-670427	DCT	TM	OK	765255	151865	0.988778	3.46246	5e-05	0.000105404	yes
XLOC_014551	XLOC_014551	TcSYL_0040750	TcX10_chr4:1021573-1022105	DCT	TM	OK	911838	180.54	0.985469	2.34707	5e-05	0.000105404	yes
XLOC_011307	XLOC_011307	TcSYL_0163580	TcX10_chr33:387478-388985	DCT	TM	OK	368608	729715	0.985248	2.69954	5e-05	0.000105404	yes
XLOC_020289	XLOC_020289	TcSYL_0079420	TcX10_chr9:1042074-1042492	DCT	TM	OK	297187	588098	0.984685	2.88531	5e-05	0.000105404	yes
XLOC_017114	XLOC_017114	TcSYL_0046010	TcX10_chr5:401592-402562	DCT	TM	OK	111756	220575	0.980913	3.0889	5e-05	0.000105404	yes
XLOC_008506	XLOC_008506	TcSYL_0142650	TcX10_chr27:293089-293771	DCT	TM	OK	137181	270329	0.978631	2.92655	5e-05	0.000105404	yes
XLOC_000331	XLOC_000331	TcSYL_0005710	TcX10_chr1:1387896-1389307	DCT	TM	OK	769863	151706	0.978604	3.13944	5e-05	0.000105404	yes
XLOC_002116	XLOC_002116	TcSYL_0088760	TcX10_chr11:1022416-1027322	DCT	TM	OK	535523	105431	0.97728	3.5118	5e-05	0.000105404	yes
XLOC_007400	XLOC_007400	TcSYL_0131400	TcX10_chr23:535833-537019	DCT	TM	OK	801295	157686	0.976652	3.04736	5e-05	0.000105404	yes
XLOC_019902	XLOC_019902	TcSYL_0073880	TcX10_chr8:872091-872749	DCT	TM	OK	143692	282658	0.976079	2.92689	5e-05	0.000105404	yes
XLOC_017472	XLOC_017472	TcSYL_0048130	TcX10_chr5:1071348-1072888	DCT	TM	OK	502297	98.79	0.975825	2.91582	5e-05	0.000105404	yes
XLOC_018894	XLOC_018894	TcSYL_0065020	TcX10_chr7:1167717-1168252	DCT	TM	OK	936929	184231	0.975507	2.37327	5e-05	0.000105404	yes
XLOC_008995	XLOC_008995	TcSYL_0147130	TcX10_chr29:109292-110283	DCT	TM	OK	483217	949758	0.97489	2.51069	5e-05	0.000105404	yes
XLOC_003145	XLOC_003145	TcSYL_0095870	TcX10_chr13:605327-606438	DCT	TM	OK	74829	146831	0.972489	2.91503	5e-05	0.000105404	yes
XLOC_008984	XLOC_008984	TcSYL_0147010	TcX10_chr29:98697-99265	DCT	TM	OK	971722	190602	0.971947	2.44589	5e-05	0.000105404	yes
XLOC_017592	XLOC_017592	TcSYL_0050200	TcX10_chr6:113601-114253	DCT	TM	OK	664653	130.33	0.971495	2.28303	5e-05	0.000105404	yes
XLOC_001951	XLOC_001951	TcSYL_0086500	TcX10_chr11:577708-578273	DCT	TM	OK	751424	147252	0.97059	2.18189	5e-05	0.000105404	yes
XLOC_020359	XLOC_020359	TcSYL_0074790	TcX10_chr9:158965-160409	DCT	TM	OK	690939	1349	0.965258	3.32536	5e-05	0.000105404	yes
XLOC_017478	XLOC_017478	TcSYL_0048190	TcX10_chr5:1090997-1092285	DCT	TM	OK	767771	149802	0.964309	3.03556	5e-05	0.000105404	yes
XLOC_000750	XLOC_000750	TcSYL_0014550	TcX10_chr1:3075813-3076927	DCT	TM	OK	333666	650913	0.964062	2.30654	5e-05	0.000105404	yes
XLOC_000066	XLOC_000066	TcSYL_0001360	TcX10_chr1:528447-529195	DCT	TM	OK	686062	133554	0.961014	2.44496	5e-05	0.000105404	yes
XLOC_005840	XLOC_005840	TcSYL_0019240	TcX10_chr2:754316-755472	DCT	TM	OK	547499	106508	0.960033	2.68065	5e-05	0.000105404	yes
XLOC_012584	XLOC_012584	TcSYL_0177140	TcX10_chr38:330012-331567	DCT	TM	OK	222027	43182	0.959697	2.31564	5e-05	0.000105404	yes
XLOC_001652	XLOC_001652	TcSYL_0083300	TcX10_chr10:1032698-1033128	DCT	TM	OK	309719	602177	0.959228	2.90646	5e-05	0.000105404	yes
XLOC_014082	XLOC_014082	TcSYL_0044770	TcX10_chr4:1509700-1510823	DCT	TM	OK	135771	263727	0.957867	3.22477	5e-05	0.000105404	yes
XLOC_006200	XLOC_006200	TcSYL_0121140	TcX10_chr20:546526-547004	DCT	TM	OK	126.23	245011	0.956791	2.41791	5e-05	0.000105404	yes
XLOC_004155	XLOC_004155	TcSYL_0106840	TcX10_chr15:402172-403007	DCT	TM	OK	159723	309745	0.955511	3.08445	5e-05	0.000105404	yes
XLOC_001129	XLOC_001129	TcSYL_0008020	TcX10_chr1:1640219-1641246	DCT	TM	OK	741478	143583	0.953411	2.82307	5e-05	0.000105404	yes
XLOC_020090	XLOC_020090	TcSYL_0076810	TcX10_chr9:626844-627646	DCT	TM	OK	990913	191803	0.952796	2.7299	5e-05	0.000105404	yes
XLOC_004897	XLOC_004897	TcSYL_0113360	TcX10_chr18:362353-363746	DCT	TM	OK	456713	883148	0.951367	2.70852	5e-05	0.000105404	yes
XLOC_016248	XLOC_016248	TcSYL_0196640	TcX10_chr43:149343-150232	DCT	TM	OK	104929	202698	0.949913	2.85539	5e-05	0.000105404	yes
XLOC_009315	XLOC_009315	TcSYL_0026950	TcX10_chr3:1069143-1069726	DCT	TM	OK	517169	998567	0.949225	3.36525	5e-05	0.000105404	yes
XLOC_003984	XLOC_003984	TcSYL_0104410	TcX10_chr15:134888-135540	DCT	TM	OK	536501	103534	0.94845	2.09629	5e-05	0.000105404	yes
XLOC_017456	XLOC_017456	TcSYL_0047970	TcX10_chr5:1004743-1006439	DCT	TM	OK	288658	556894	0.948043	3.3996	5e-05	0.000105404	yes
XLOC_018794	XLOC_018794	TcSYL_0063250	TcX10_chr7:325124-326067	DCT	TM	OK	89579	172425	0.944734	2.79978	5e-05	0.000105404	yes
XLOC_020423	XLOC_020423	TcSYL_0075440	TcX10_chr9:436460-437055	DCT	TM	OK	105.69	202911	0.941006	2.47899	5e-05	0.000105404	yes
XLOC_014581	XLOC_014581	TcSYL_0041240	TcX10_chr4:1073463-1074640	DCT	TM	OK	312088	598193	0.938657	2.2629	5e-05	0.000105404	yes
XLOC_002338	XLOC_002338	TcSYL_0089090	TcX10_chr12:104516-108045	DCT	TM	OK	118134	226168	0.936968	3.34192	5e-05	0.000105404	yes
XLOC_001972	XLOC_001972	TcSYL_0086720	TcX10_chr11:641738-642669	DCT	TM	OK	629635	120.49	0.936324	2.53588	5e-05	0.000105404	yes
XLOC_009352	XLOC_009352	TcSYL_0027620	TcX10_chr3:1368535-1369511	DCT	TM	OK	143861	275152	0.935555	3.08009	5e-05	0.000105404	yes
XLOC_009005	XLOC_009005	TcSYL_0147260	TcX10_chr29:212513-213771	DCT	TM	OK	239.65	457659	0.933347	3.38174	5e-05	0.000105404	yes
XLOC_004737	XLOC_004737	TcSYL_0113510	TcX10_chr18:414066-415309	DCT	TM	OK	130251	248704	0.933135	3.17409	5e-05	0.000105404	yes
XLOC_004482	XLOC_004482	TcSYL_0111940	TcX10_chr16:1234459-1236002	DCT	TM	OK	488612	931211	0.930418	2.75742	5e-05	0.000105404	yes
XLOC_003158	XLOC_003158	TcSYL_0096000	TcX10_chr13:638806-639404	DCT	TM	OK	147737	281467	0.929931	2.6514	5e-05	0.000105404	yes
XLOC_018793	XLOC_018793	TcSYL_0063240	TcX10_chr7:323406-323986	DCT	TM	OK	948155	180.45	0.928403	2.35885	5e-05	0.000105404	yes
XLOC_008956	XLOC_008956	TcSYL_0146630	TcX10_chr29:74120-75009	DCT	TM	OK	125.22	238187	0.927626	2.93053	5e-05	0.000105404	yes
XLOC_015230	XLOC_015230	TcSYL_0188840	TcX10_chr41:285195-286321	DCT	TM	OK	400471	761368	0.926896	2.34307	5e-05	0.000105404	yes
XLOC_009008	XLOC_009008	TcSYL_0147290	TcX10_chr29:226920-227869	DCT	TM	OK	431826	820428	0.925927	2.27721	5e-05	0.000105404	yes
XLOC_009218	XLOC_009218	TcSYL_0025630	TcX10_chr3:977092-977585	DCT	TM	OK	985125	187112	0.92552	2.12432	5e-05	0.000105404	yes
XLOC_014131	XLOC_014131	TcSYL_0030840	TcX10_chr4:89056-89384	DCT	TM	OK	382297	725847	0.924974	2.49431	5e-05	0.000105404	yes
XLOC_006204	XLOC_006204	TcSYL_0121180	TcX10_chr20:548189-548991	DCT	TM	OK	102825	194712	0.921149	2.54197	5e-05	0.000105404	yes
XLOC_009350	XLOC_009350	TcSYL_0027600	TcX10_chr3:1364662-1365170	DCT	TM	OK	259459	490441	0.918572	2.77927	5e-05	0.000105404	yes
XLOC_001842	XLOC_001842	TcSYL_0084980	TcX10_chr11:365375-366333	DCT	TM	OK	908011	171635	0.918562	2.76994	5e-05	0.000105404	yes
XLOC_020082	XLOC_020082	TcSYL_0076700	TcX10_chr9:620515-621332	DCT	TM	OK	635186	120003	0.917823	2.37473	5e-05	0.000105404	yes
XLOC_011851	XLOC_011851	TcSYL_0169160	TcX10_chr36:146107-146903	DCT	TM	OK	55995	105633	0.915688	2.24919	5e-05	0.000105404	yes
XLOC_020427	XLOC_020427	TcSYL_0075480	TcX10_chr9:445129-446414	DCT	TM	OK	115821	218219	0.913883	3.10485	5e-05	0.000105404	yes
XLOC_020410	XLOC_020410	TcSYL_0075310	TcX10_chr9:390775-392102	DCT	TM	OK	968187	182243	0.912503	3.0169	5e-05	0.000105404	yes
XLOC_007482	XLOC_007482	TcSYL_0132370	TcX10_chr23:601748-602241	DCT	TM	OK	131284	246932	0.911429	2.32645	5e-05	0.000105404	yes
XLOC_006206	XLOC_006206	TcSYL_0121210	TcX10_chr20:551523-553183	DCT	TM	OK	311834	586388	0.911079	2.48927	5e-05	0.000105404	yes
XLOC_020258	XLOC_020258	TcSYL_0079080	TcX10_chr9:961207-961685	DCT	TM	OK	252773	475232	0.910791	2.73426	5e-05	0.000105404	yes
XLOC_004315	XLOC_004315	TcSYL_0108770	TcX10_chr15:885037-886148	DCT	TM	OK	678249	127434	0.909863	2.6506	5e-05	0.000105404	yes
XLOC_009666	XLOC_009666	TcSYL_0027170	TcX10_chr3:1150911-1152055	DCT	TM	OK	117678	220517	0.906051	3.00954	5e-05	0.000105404	yes
XLOC_012954	XLOC_012954	TcSYL_0182030	TcX10_chr39:340272-341227	DCT	TM	OK	707762	132617	0.905926	2.50463	5e-05	0.000105404	yes
XLOC_008348	XLOC_008348	TcSYL_0140410	TcX10_chr26:417868-418385	DCT	TM	OK	318964	596762	0.90376	2.92219	5e-05	0.000105404	yes
XLOC_017461	XLOC_017461	TcSYL_0048020	TcX10_chr5:1042192-1042961	DCT	TM	OK	155905	291273	0.901705	2.85063	5e-05	0.000105404	yes
XLOC_009529	XLOC_009529	TcSYL_0023130	TcX10_chr3:310821-311269	DCT	TM	OK	623867	1163.86	0.899608	3.09478	5e-05	0.000105404	yes
XLOC_009660	XLOC_009660	TcSYL_0027110	TcX10_chr3:1129929-1130956	DCT	TM	OK	113191	210614	0.895837	2.88664	5e-05	0.000105404	yes
XLOC_011840	XLOC_011840	TcSYL_0169050	TcX10_chr36:126803-127716	DCT	TM	OK	478742	890346	0.895119	2.21121	5e-05	0.000105404	yes
XLOC_020217	XLOC_020217	TcSYL_0078640	TcX10_chr9:783827-785583	DCT	TM	OK	148822	276763	0.895064	3.23456	5e-05	0.000105404	yes
XLOC_017097	XLOC_017097	TcSYL_0045840	TcX10_chr5:344164-345539	DCT	TM	OK	805755	149561	0.892317	2.86736	5e-05	0.000105404	yes
XLOC_000100	XLOC_000100	TcSYL_0001980	TcX10_chr1:788745-789199	DCT	TM	OK	159198	295367	0.891687	2.3068	5e-05	0.000105404	yes
XLOC_006492	XLOC_006492	TcSYL_0121740	TcX10_chr21:158995-159785	DCT	TM	OK	114195	211799	0.8912	2.66792	5e-05	0.000105404	yes
XLOC_002403	XLOC_002403	TcSYL_0089890	TcX10_chr12:306779-308349	DCT	TM	OK	682059	126487	0.891019	2.86353	5e-05	0.000105404	yes
XLOC_005345	XLOC_005345	TcSYL_0016930	TcX10_chr2:446092-446945	DCT	TM	OK	896616	166117	0.889635	2.56197	5e-05	0.000105404	yes
XLOC_002039	XLOC_002039	TcSYL_0087810	TcX10_chr11:813404-815733	DCT	TM	OK	314465	582431	0.889187	2.6588	5e-05	0.000105404	yes
XLOC_009503	XLOC_009503	TcSYL_0022840	TcX10_chr3:195482-196392	DCT	TM	OK	577679	106961	0.888745	2.32051	5e-05	0.000105404	yes
XLOC_002679	XLOC_002679	TcSYL_0092060	TcX10_chr12:916466-917592	DCT	TM	OK	571832	105805	0.887748	2.49458	5e-05	0.000105404	yes
XLOC_018893	XLOC_018893	TcSYL_0065010	TcX10_chr7:1155826-1157108	DCT	TM	OK	751389	138895	0.886363	2.76923	5e-05	0.000105404	yes
XLOC_002092	XLOC_002092	TcSYL_0088500	TcX10_chr11:906258-906946	DCT	TM	OK	111898	206555	0.884341	2.47785	5e-05	0.000105404	yes
XLOC_007444	XLOC_007444	TcSYL_0131910	TcX10_chr23:572401-573680	DCT	TM	OK	592548	109093	0.880552	2.59956	5e-05	0.000105404	yes
XLOC_020368	XLOC_020368	TcSYL_0074890	TcX10_chr9:195731-196920	DCT	TM	OK	186781	343.18	0.877616	3.12015	5e-05	0.000105404	yes
XLOC_016241	XLOC_016241	TcSYL_0196560	TcX10_chr43:142535-144351	DCT	TM	OK	331746	608365	0.874857	2.48355	5e-05	0.000105404	yes
XLOC_020372	XLOC_020372	TcSYL_0074930	TcX10_chr9:204123-204712	DCT	TM	OK	382592	700927	0.873458	3.01713	5e-05	0.000105404	yes
XLOC_012189	XLOC_012189	TcSYL_0172900	TcX10_chr37:191791-196214	DCT	TM	OK	866422	158672	0.872905	2.21497	5e-05	0.000105404	yes
XLOC_017176	XLOC_017176	TcSYL_0046760	TcX10_chr5:615268-616160	DCT	TM	OK	101568	185967	0.8726	2.59251	5e-05	0.000105404	yes
XLOC_000094	XLOC_000094	TcSYL_0001920	TcX10_chr1:763557-764224	DCT	TM	OK	172083	314914	0.871857	2.76545	5e-05	0.000105404	yes
XLOC_000210	XLOC_000210	TcSYL_0004220	TcX10_chr1:1132169-1132578	DCT	TM	OK	297995	544929	0.87078	2.48462	5e-05	0.000105404	yes
XLOC_012974	XLOC_012974	TcSYL_0182310	TcX10_chr39:357247-357632	DCT	TM	OK	457447	835659	0.869309	2.6976	5e-05	0.000105404	yes
XLOC_017581	XLOC_017581	TcSYL_0050090	TcX10_chr6:67827-68341	DCT	TM	OK	1746.3	3189.64	0.869091	3.12807	5e-05	0.000105404	yes
XLOC_004969	XLOC_004969	TcSYL_0115680	TcX10_chr19:440954-441738	DCT	TM	OK	796501	145451	0.868786	2.35939	5e-05	0.000105404	yes
XLOC_008154	XLOC_008154	TcSYL_0139360	TcX10_chr26:102903-105175	DCT	TM	OK	743063	135585	0.867637	2.96367	5e-05	0.000105404	yes
XLOC_004772	XLOC_004772	TcSYL_0113950	TcX10_chr18:489241-491453	DCT	TM	OK	773442	140745	0.863717	2.92795	5e-05	0.000105404	yes
XLOC_004412	XLOC_004412	TcSYL_0111090	TcX10_chr16:1008420-1009675	DCT	TM	OK	813897	147955	0.862244	2.74814	5e-05	0.000105404	yes
XLOC_008097	XLOC_008097	TcSYL_0138840	TcX10_chr25:390879-392002	DCT	TM	OK	428027	777502	0.861147	2.2278	5e-05	0.000105404	yes
XLOC_020240	XLOC_020240	TcSYL_0078880	TcX10_chr9:866379-867046	DCT	TM	OK	157313	285738	0.861054	2.61047	5e-05	0.000105404	yes
XLOC_008288	XLOC_008288	TcSYL_0139730	TcX10_chr26:290085-290491	DCT	TM	OK	215661	391671	0.860875	2.26563	5e-05	0.000105404	yes
XLOC_003972	XLOC_003972	TcSYL_0104180	TcX10_chr15:121023-122716	DCT	TM	OK	42611	773851	0.860831	2.52943	5e-05	0.000105404	yes
XLOC_004667	XLOC_004667	TcSYL_0110930	TcX10_chr16:907273-907604	DCT	TM	OK	508829	923296	0.859612	2.47723	5e-05	0.000105404	yes
XLOC_019842	XLOC_019842	TcSYL_0073270	TcX10_chr8:291669-292231	DCT	TM	OK	100438	182188	0.859124	2.14496	5e-05	0.000105404	yes
XLOC_000754	XLOC_000754	TcSYL_0014590	TcX10_chr1:3079838-3080472	DCT	TM	OK	789684	143158	0.858257	2.10992	5e-05	0.000105404	yes
XLOC_011248	XLOC_011248	TcSYL_0162640	TcX10_chr33:293411-294360	DCT	TM	OK	510419	925187	0.858063	2.21908	5e-05	0.000105404	yes
XLOC_004169	XLOC_004169	TcSYL_0106980	TcX10_chr15:505037-505572	DCT	TM	OK	195.51	354315	0.857791	2.51729	5e-05	0.000105404	yes
XLOC_000239	XLOC_000239	TcSYL_0004510	TcX10_chr1:1194704-1195287	DCT	TM	OK	147928	268053	0.857625	2.45848	5e-05	0.000105404	yes
XLOC_000846	XLOC_000846	TcSYL_0001540	TcX10_chr1:588662-589647	DCT	TM	OK	145315	263135	0.856622	2.84774	5e-05	0.000105404	yes
XLOC_010583	XLOC_010583	TcSYL_0156570	TcX10_chr31:353997-356194	DCT	TM	OK	759049	137254	0.854583	2.95867	5e-05	0.000105404	yes
XLOC_020414	XLOC_020414	TcSYL_0075350	TcX10_chr9:405424-406151	DCT	TM	OK	210967	381449	0.854476	2.82191	5e-05	0.000105404	yes
XLOC_008151	XLOC_008151	TcSYL_0139330	TcX10_chr26:96321-97495	DCT	TM	OK	578582	104544	0.85351	2.4266	5e-05	0.000105404	yes
XLOC_009302	XLOC_009302	TcSYL_0026790	TcX10_chr3:1057984-1060094	DCT	TM	OK	81234	146642	0.852144	2.97489	5e-05	0.000105404	yes
XLOC_003761	XLOC_003761	TcSYL_0102970	TcX10_chr14:846243-846904	DCT	TM	OK	759662	137.06	0.851381	2.12873	5e-05	0.000105404	yes
XLOC_019886	XLOC_019886	TcSYL_0073720	TcX10_chr8:840212-841965	DCT	TM	OK	347637	625707	0.847905	2.38104	5e-05	0.000105404	yes
XLOC_000512	XLOC_000512	TcSYL_0010130	TcX10_chr1:1981685-1983975	DCT	TM	OK	449282	807348	0.845569	2.72565	5e-05	0.000105404	yes
XLOC_004458	XLOC_004458	TcSYL_0111690	TcX10_chr16:1158402-1159813	DCT	TM	OK	754349	135443	0.844384	2.66719	5e-05	0.000105404	yes
XLOC_009207	XLOC_009207	TcSYL_0025490	TcX10_chr3:965468-966759	DCT	TM	OK	514856	922468	0.841331	2.36375	5e-05	0.000105404	yes
XLOC_004747	XLOC_004747	TcSYL_0113620	TcX10_chr18:457497-458134	DCT	TM	OK	113447	203094	0.840134	2.30272	5e-05	0.000105404	yes
XLOC_008139	XLOC_008139	TcSYL_0139210	TcX10_chr26:54338-55626	DCT	TM	OK	752167	134.48	0.838271	2.59434	5e-05	0.000105404	yes
XLOC_005183	XLOC_005183	TcSYL_0117400	TcX10_chr19:757099-757658	DCT	TM	OK	122951	219761	0.837853	2.21825	5e-05	0.000105404	yes
XLOC_013358	XLOC_013358	TcSYL_0030720	TcX10_chr4:81295-83060	DCT	TM	OK	127411	227259	0.834847	2.98376	5e-05	0.000105404	yes
XLOC_001308	XLOC_001308	TcSYL_0011060	TcX10_chr1:2174449-2175044	DCT	TM	OK	952725	169851	0.834139	2.14146	5e-05	0.000105404	yes
XLOC_009353	XLOC_009353	TcSYL_0027630	TcX10_chr3:1370063-1370604	DCT	TM	OK	123875	220762	0.833608	2.16493	5e-05	0.000105404	yes
XLOC_011718	XLOC_011718	TcSYL_0167010	TcX10_chr35:275619-276838	DCT	TM	OK	887574	158173	0.83356	2.63597	5e-05	0.000105404	yes
XLOC_011252	XLOC_011252	TcSYL_0162710	TcX10_chr33:296846-297654	DCT	TM	OK	130056	231541	0.83213	2.5782	5e-05	0.000105404	yes
XLOC_017644	XLOC_017644	TcSYL_0050820	TcX10_chr6:228289-228713	DCT	TM	OK	372765	662.77	0.830241	2.58969	5e-05	0.000105404	yes
XLOC_014583	XLOC_014583	TcSYL_0041260	TcX10_chr4:1077993-1078471	DCT	TM	OK	177959	316152	0.829077	2.26781	5e-05	0.000105404	yes
XLOC_000928	XLOC_000928	TcSYL_0003190	TcX10_chr1:898851-899686	DCT	TM	OK	124694	221255	0.82731	2.56023	5e-05	0.000105404	yes
XLOC_002667	XLOC_002667	TcSYL_0091940	TcX10_chr12:875681-876759	DCT	TM	OK	559586	992813	0.827161	2.27921	5e-05	0.000105404	yes
XLOC_020230	XLOC_020230	TcSYL_0078780	TcX10_chr9:818939-819555	DCT	TM	OK	2019.23	3581.34	0.82669	2.8851	5e-05	0.000105404	yes
XLOC_018451	XLOC_018451	TcSYL_0057160	TcX10_chr6:962795-963774	DCT	TM	OK	928673	164544	0.825227	2.51342	5e-05	0.000105404	yes
XLOC_004194	XLOC_004194	TcSYL_0107230	TcX10_chr15:603766-604379	DCT	TM	OK	169003	299.09	0.823529	2.46009	5e-05	0.000105404	yes
XLOC_000036	XLOC_000036	TcSYL_0000600	TcX10_chr1:190110-191146	DCT	TM	OK	645356	114091	0.822022	2.31302	5e-05	0.000105404	yes
XLOC_018715	XLOC_018715	TcSYL_0062260	TcX10_chr7:210832-211448	DCT	TM	OK	120683	213143	0.820601	2.2215	5e-05	0.000105404	yes
XLOC_004418	XLOC_004418	TcSYL_0111150	TcX10_chr16:1028249-1029120	DCT	TM	OK	101625	179352	0.819547	2.4502	5e-05	0.000105404	yes
XLOC_017205	XLOC_017205	TcSYL_0047050	TcX10_chr5:698177-701238	DCT	TM	OK	580823	102214	0.815415	2.79565	5e-05	0.000105404	yes
XLOC_015233	XLOC_015233	TcSYL_0188870	TcX10_chr41:287579-288834	DCT	TM	OK	519455	913667	0.814671	2.30147	5e-05	0.000105404	yes
XLOC_004651	XLOC_004651	TcSYL_0110770	TcX10_chr16:809499-810349	DCT	TM	OK	117831	207053	0.813277	2.49839	5e-05	0.000105404	yes
XLOC_000836	XLOC_000836	TcSYL_0001440	TcX10_chr1:571806-572278	DCT	TM	OK	469279	824431	0.812952	2.7497	5e-05	0.000105404	yes
XLOC_018043	XLOC_018043	TcSYL_0049990	TcX10_chr6:21123-21553	DCT	TM	OK	248255	435.34	0.810321	2.22056	5e-05	0.000105404	yes
XLOC_004833	XLOC_004833	TcSYL_0114690	TcX10_chr18:648735-649639	DCT	TM	OK	187.7	328623	0.808	2.7487	5e-05	0.000105404	yes
XLOC_004281	XLOC_004281	TcSYL_0108300	TcX10_chr15:807474-808219	DCT	TM	OK	129933	226057	0.798921	2.40551	5e-05	0.000105404	yes
XLOC_002766	XLOC_002766	TcSYL_0094620	TcX10_chr13:423924-424708	DCT	TM	OK	209991	365134	0.798101	2.67361	5e-05	0.000105404	yes
XLOC_004891	XLOC_004891	TcSYL_0113300	TcX10_chr18:348483-348823	DCT	TM	OK	846267	1468.21	0.794877	2.62941	5e-05	0.000105404	yes
XLOC_017182	XLOC_017182	TcSYL_0046820	TcX10_chr5:620236-621062	DCT	TM	OK	117698	204073	0.793994	2.38215	5e-05	0.000105404	yes
XLOC_013054	XLOC_013054	TcSYL_0178810	TcX10_chr39:27604-29504	DCT	TM	OK	411245	712676	0.793248	2.38617	5e-05	0.000105404	yes
XLOC_020075	XLOC_020075	TcSYL_0076630	TcX10_chr9:614687-615840	DCT	TM	OK	615876	106647	0.792135	2.24058	5e-05	0.000105404	yes
XLOC_018702	XLOC_018702	TcSYL_0062130	TcX10_chr7:186919-187373	DCT	TM	OK	380181	656933	0.78906	2.5168	5e-05	0.000105404	yes
XLOC_004764	XLOC_004764	TcSYL_0113860	TcX10_chr18:472861-474773	DCT	TM	OK	744479	128172	0.783774	2.64228	5e-05	0.000105404	yes
XLOC_004649	XLOC_004649	TcSYL_0110750	TcX10_chr16:805257-806872	DCT	TM	OK	885023	152217	0.782342	2.63935	5e-05	0.000105404	yes
XLOC_008069	XLOC_008069	TcSYL_0138540	TcX10_chr25:144708-145144	DCT	TM	OK	760419	1307.32	0.781746	2.65157	5e-05	0.000105404	yes
XLOC_016274	XLOC_016274	TcSYL_0196960	TcX10_chr43:172915-173654	DCT	TM	OK	115154	197.71	0.779825	2.24676	5e-05	0.000105404	yes
XLOC_020416	XLOC_020416	TcSYL_0075370	TcX10_chr9:415939-417005	DCT	TM	OK	912815	156712	0.779724	2.37601	5e-05	0.000105404	yes
XLOC_019381	XLOC_019381	TcSYL_0063480	TcX10_chr7:587453-587967	DCT	TM	OK	160201	274656	0.777741	2.15487	5e-05	0.000105404	yes
XLOC_016246	XLOC_016246	TcSYL_0196620	TcX10_chr43:147510-148234	DCT	TM	OK	124064	212538	0.776635	2.27524	5e-05	0.000105404	yes
XLOC_011859	XLOC_011859	TcSYL_0169240	TcX10_chr36:159506-161223	DCT	TM	OK	39161	670042	0.774833	2.24592	5e-05	0.000105404	yes
XLOC_017364	XLOC_017364	TcSYL_0045370	TcX10_chr5:236588-239124	DCT	TM	OK	117513	200855	0.773328	2.80755	5e-05	0.000105404	yes
XLOC_017134	XLOC_017134	TcSYL_0046260	TcX10_chr5:481415-482928	DCT	TM	OK	61375	104893	0.773194	2.39921	5e-05	0.000105404	yes
XLOC_015250	XLOC_015250	TcSYL_0189080	TcX10_chr41:303158-304752	DCT	TM	OK	605325	103337	0.771577	2.40815	5e-05	0.000105404	yes
XLOC_014752	XLOC_014752	TcSYL_0043640	TcX10_chr4:1330962-1332145	DCT	TM	OK	81539	139018	0.769714	2.37676	5e-05	0.000105404	yes
XLOC_001841	XLOC_001841	TcSYL_0084960	TcX10_chr11:363376-364868	DCT	TM	OK	616319	105039	0.76917	2.36568	5e-05	0.000105404	yes
XLOC_000043	XLOC_000043	TcSYL_0001130	TcX10_chr1:419984-421293	DCT	TM	OK	563548	959681	0.768018	2.22824	5e-05	0.000105404	yes
XLOC_017418	XLOC_017418	TcSYL_0047590	TcX10_chr5:908485-910403	DCT	TM	OK	42701	724302	0.762322	2.32048	5e-05	0.000105404	yes
XLOC_004188	XLOC_004188	TcSYL_0107170	TcX10_chr15:587468-588357	DCT	TM	OK	884415	149782	0.760071	2.19739	5e-05	0.000105404	yes
XLOC_005093	XLOC_005093	TcSYL_0116220	TcX10_chr19:617856-618556	DCT	TM	OK	995661	168316	0.757448	2.03926	5e-05	0.000105404	yes
XLOC_004647	XLOC_004647	TcSYL_0110730	TcX10_chr16:758432-759624	DCT	TM	OK	805494	136.09	0.756615	2.32788	5e-05	0.000105404	yes
XLOC_009297	XLOC_009297	TcSYL_0026740	TcX10_chr3:1054866-1055818	DCT	TM	OK	131205	221339	0.754433	2.43557	5e-05	0.000105404	yes
XLOC_004859	XLOC_004859	TcSYL_0112920	TcX10_chr18:272962-273986	DCT	TM	OK	135.59	228.62	0.753695	2.48163	5e-05	0.000105404	yes
XLOC_009527	XLOC_009527	TcSYL_0023110	TcX10_chr3:302292-303319	DCT	TM	OK	940886	158478	0.752191	2.32945	5e-05	0.000105404	yes
XLOC_001819	XLOC_001819	TcSYL_0084630	TcX10_chr11:318669-319543	DCT	TM	OK	717793	120862	0.751723	2.03412	5e-05	0.000105404	yes
XLOC_020352	XLOC_020352	TcSYL_0074720	TcX10_chr9:139942-140372	DCT	TM	OK	323754	543.42	0.747172	2.24072	5e-05	0.000105404	yes
XLOC_018703	XLOC_018703	TcSYL_0062140	TcX10_chr7:187688-188433	DCT	TM	OK	336626	564709	0.74636	2.62484	5e-05	0.000105404	yes
XLOC_020344	XLOC_020344	TcSYL_0074640	TcX10_chr9:113612-114075	DCT	TM	OK	245826	412.31	0.74609	2.18718	5e-05	0.000105404	yes
XLOC_004648	XLOC_004648	TcSYL_0110740	TcX10_chr16:799698-800422	DCT	TM	OK	130573	218729	0.744292	2.189	5e-05	0.000105404	yes
XLOC_006511	XLOC_006511	TcSYL_0121970	TcX10_chr21:276061-276425	DCT	TM	OK	646349	1080.58	0.741416	2.38578	5e-05	0.000105404	yes
XLOC_011909	XLOC_011909	TcSYL_0170040	TcX10_chr36:246140-246750	DCT	TM	OK	202011	337423	0.740124	2.28927	5e-05	0.000105404	yes
XLOC_004317	XLOC_004317	TcSYL_0108790	TcX10_chr15:891017-891834	DCT	TM	OK	118515	197855	0.739369	2.22436	5e-05	0.000105404	yes
XLOC_000566	XLOC_000566	TcSYL_0011540	TcX10_chr1:2333695-2334602	DCT	TM	OK	974292	162556	0.738513	2.20616	5e-05	0.000105404	yes
XLOC_001433	XLOC_001433	TcSYL_0013710	TcX10_chr1:2771047-2771984	DCT	TM	OK	121463	202585	0.738015	2.30377	5e-05	0.000105404	yes
XLOC_008142	XLOC_008142	TcSYL_0139240	TcX10_chr26:65205-66184	DCT	TM	OK	740092	123309	0.736506	2.09797	5e-05	0.000105404	yes
XLOC_011987	XLOC_011987	TcSYL_0170950	TcX10_chr36:443478-444529	DCT	TM	OK	66522	110829	0.736427	2.08049	5e-05	0.000105404	yes
XLOC_007431	XLOC_007431	TcSYL_0131770	TcX10_chr23:564631-566462	DCT	TM	OK	677917	112873	0.735519	2.42331	5e-05	0.000105404	yes
XLOC_012270	XLOC_012270	TcSYL_0174700	TcX10_chr37:446363-447921	DCT	TM	OK	654793	108937	0.734383	2.29375	5e-05	0.000105404	yes
XLOC_002529	XLOC_002529	TcSYL_0091830	TcX10_chr12:611613-612748	DCT	TM	OK	210.25	349755	0.734239	2.60634	5e-05	0.000105404	yes
XLOC_017591	XLOC_017591	TcSYL_0050190	TcX10_chr6:108206-109398	DCT	TM	OK	521136	865634	0.732097	1.99384	5e-05	0.000105404	yes
XLOC_009230	XLOC_009230	TcSYL_0025770	TcX10_chr3:986442-987946	DCT	TM	OK	82055	136.08	0.729796	2.38102	5e-05	0.000105404	yes
XLOC_005649	XLOC_005649	TcSYL_0014710	TcX10_chr2:24586-25475	DCT	TM	OK	200253	331741	0.728238	2.4955	5e-05	0.000105404	yes
XLOC_005995	XLOC_005995	TcSYL_0117730	TcX10_chr20:66343-68231	DCT	TM	OK	665498	109521	0.718701	2.33554	5e-05	0.000105404	yes
XLOC_002514	XLOC_002514	TcSYL_0091680	TcX10_chr12:539408-540186	DCT	TM	OK	121003	198761	0.715995	2.10453	5e-05	0.000105404	yes
XLOC_004838	XLOC_004838	TcSYL_0114740	TcX10_chr18:667096-667988	DCT	TM	OK	164383	269618	0.713851	2.3541	5e-05	0.000105404	yes
XLOC_018706	XLOC_018706	TcSYL_0062170	TcX10_chr7:192883-193895	DCT	TM	OK	121973	199965	0.713194	2.34539	5e-05	0.000105404	yes
XLOC_004894	XLOC_004894	TcSYL_0113330	TcX10_chr18:354754-355847	DCT	TM	OK	746306	122131	0.710592	2.03891	5e-05	0.000105404	yes
XLOC_000509	XLOC_000509	TcSYL_0010100	TcX10_chr1:1977919-1980284	DCT	TM	OK	665606	108818	0.709179	2.43249	5e-05	0.000105404	yes
XLOC_004584	XLOC_004584	TcSYL_0109350	TcX10_chr16:196785-198421	DCT	TM	OK	593628	969261	0.707326	2.21967	5e-05	0.000105404	yes
XLOC_008183	XLOC_008183	TcSYL_0140570	TcX10_chr26:472036-472763	DCT	TM	OK	353281	576301	0.706005	2.47908	5e-05	0.000105404	yes
XLOC_000095	XLOC_000095	TcSYL_0001930	TcX10_chr1:770986-771662	DCT	TM	OK	302827	493904	0.705733	2.41693	5e-05	0.000105404	yes
XLOC_004523	XLOC_004523	TcSYL_0112350	TcX10_chr16:1383491-1384050	DCT	TM	OK	377275	614662	0.704176	2.38019	5e-05	0.000105404	yes
XLOC_006433	XLOC_006433	TcSYL_0123460	TcX10_chr21:557282-558174	DCT	TM	OK	136965	223082	0.703767	2.18891	5e-05	0.000105404	yes
XLOC_008516	XLOC_008516	TcSYL_0142750	TcX10_chr27:340549-341456	DCT	TM	OK	233169	379435	0.702472	2.44416	5e-05	0.000105404	yes
XLOC_000238	XLOC_000238	TcSYL_0004500	TcX10_chr1:1193633-1194360	DCT	TM	OK	403898	656834	0.701538	2.50628	5e-05	0.000105404	yes
XLOC_009060	XLOC_009060	TcSYL_0023180	TcX10_chr3:349827-351853	DCT	TM	OK	563184	912995	0.696999	2.25307	5e-05	0.000105404	yes
XLOC_020239	XLOC_020239	TcSYL_0078870	TcX10_chr9:863400-864076	DCT	TM	OK	183725	296476	0.690366	2.1465	5e-05	0.000105404	yes
XLOC_000050	XLOC_000050	TcSYL_0001200	TcX10_chr1:467569-469202	DCT	TM	OK	182835	294621	0.68832	2.49346	5e-05	0.000105404	yes
XLOC_003200	XLOC_003200	TcSYL_0096640	TcX10_chr13:681741-683134	DCT	TM	OK	109265	175835	0.686393	2.30019	5e-05	0.000105404	yes
XLOC_017473	XLOC_017473	TcSYL_0048140	TcX10_chr5:1073300-1074477	DCT	TM	OK	860401	138.38	0.68555	2.12684	5e-05	0.000105404	yes
XLOC_020367	XLOC_020367	TcSYL_0074880	TcX10_chr9:194254-194771	DCT	TM	OK	334604	538031	0.685235	2.23288	5e-05	0.000105404	yes
XLOC_009482	XLOC_009482	TcSYL_0022630	TcX10_chr3:140332-141050	DCT	TM	OK	194.48	312522	0.684336	2.16574	5e-05	0.000105404	yes
XLOC_011998	XLOC_011998	TcSYL_0171070	TcX10_chr36:452985-453682	DCT	TM	OK	208819	335195	0.682747	2.20524	5e-05	0.000105404	yes
XLOC_014781	XLOC_014781	TcSYL_0043980	TcX10_chr4:1357764-1358443	DCT	TM	OK	149861	239619	0.677118	1.97737	5e-05	0.000105404	yes
XLOC_008272	XLOC_008272	TcSYL_0139570	TcX10_chr26:222494-223740	DCT	TM	OK	843382	134725	0.675754	2.10766	5e-05	0.000105404	yes
XLOC_005076	XLOC_005076	TcSYL_0116050	TcX10_chr19:568086-569251	DCT	TM	OK	141998	225441	0.66688	2.24811	5e-05	0.000105404	yes
XLOC_004467	XLOC_004467	TcSYL_0111780	TcX10_chr16:1191935-1194348	DCT	TM	OK	851783	135192	0.666457	2.37007	5e-05	0.000105404	yes
XLOC_000572	XLOC_000572	TcSYL_0011600	TcX10_chr1:2354826-2355778	DCT	TM	OK	133399	211467	0.664692	2.13519	5e-05	0.000105404	yes
XLOC_020268	XLOC_020268	TcSYL_0079210	TcX10_chr9:983041-983765	DCT	TM	OK	205346	323544	0.655907	2.14112	5e-05	0.000105404	yes
XLOC_008329	XLOC_008329	TcSYL_0140200	TcX10_chr26:395559-397507	DCT	TM	OK	226399	356601	0.655445	2.38955	5e-05	0.000105404	yes
XLOC_008987	XLOC_008987	TcSYL_0147040	TcX10_chr29:101173-104288	DCT	TM	OK	118364	186313	0.654504	2.39709	5e-05	0.000105404	yes
XLOC_008411	XLOC_008411	TcSYL_0141890	TcX10_chr27:117624-118249	DCT	TM	OK	267136	415063	0.635756	2.09981	5e-05	0.000105404	yes
XLOC_008404	XLOC_008404	TcSYL_0141820	TcX10_chr27:95830-97055	DCT	TM	OK	201.87	312896	0.632256	2.25742	5e-05	0.000105404	yes
XLOC_017210	XLOC_017210	TcSYL_0047100	TcX10_chr5:708665-709140	DCT	TM	OK	473092	733089	0.631867	2.15057	5e-05	0.000105404	yes
XLOC_006407	XLOC_006407	TcSYL_0123150	TcX10_chr21:532504-533441	DCT	TM	OK	150207	232699	0.631512	2.07127	5e-05	0.000105404	yes
XLOC_004681	XLOC_004681	TcSYL_0111070	TcX10_chr16:973434-975277	DCT	TM	OK	785737	121537	0.629277	2.11089	5e-05	0.000105404	yes
XLOC_004159	XLOC_004159	TcSYL_0106880	TcX10_chr15:471144-472801	DCT	TM	OK	805304	124236	0.62548	2.06534	5e-05	0.000105404	yes
XLOC_000842	XLOC_000842	TcSYL_0001500	TcX10_chr1:581654-583947	DCT	TM	OK	434959	670223	0.623764	1.97309	5e-05	0.000105404	yes
XLOC_018890	XLOC_018890	TcSYL_0064980	TcX10_chr7:1148090-1150140	DCT	TM	OK	71047	109.42	0.623033	2.09195	5e-05	0.000105404	yes
XLOC_002368	XLOC_002368	TcSYL_0089390	TcX10_chr12:239092-239909	DCT	TM	OK	167331	256573	0.61667	1.99606	5e-05	0.000105404	yes
XLOC_005351	XLOC_005351	TcSYL_0017010	TcX10_chr2:452429-453729	DCT	TM	OK	939778	143825	0.613924	1.97962	5e-05	0.000105404	yes
XLOC_020412	XLOC_020412	TcSYL_0075330	TcX10_chr9:399225-400261	DCT	TM	OK	114626	174982	0.610274	1.94194	5e-05	0.000105404	yes
XLOC_018827	XLOC_018827	TcSYL_0064220	TcX10_chr7:973385-973893	DCT	TM	OK	268683	410058	0.609926	1.88288	5e-05	0.000105404	yes
XLOC_002060	XLOC_002060	TcSYL_0088030	TcX10_chr11:852342-853927	DCT	TM	OK	119459	181855	0.606273	2.11583	5e-05	0.000105404	yes
XLOC_005148	XLOC_005148	TcSYL_0116870	TcX10_chr19:718314-720370	DCT	TM	OK	880104	133951	0.605957	2.11484	5e-05	0.000105404	yes
XLOC_000521	XLOC_000521	TcSYL_0010250	TcX10_chr1:1992542-1993581	DCT	TM	OK	125882	191528	0.605486	1.96141	5e-05	0.000105404	yes
XLOC_017174	XLOC_017174	TcSYL_0046740	TcX10_chr5:612263-614220	DCT	TM	OK	801465	121124	0.595773	1.99621	5e-05	0.000105404	yes
XLOC_009021	XLOC_009021	TcSYL_0147430	TcX10_chr29:283979-285558	DCT	TM	OK	145726	219774	0.592762	2.10918	5e-05	0.000105404	yes
XLOC_008180	XLOC_008180	TcSYL_0140540	TcX10_chr26:462206-462963	DCT	TM	OK	210421	314875	0.581499	1.9123	5e-05	0.000105404	yes
XLOC_009351	XLOC_009351	TcSYL_0027610	TcX10_chr3:1365260-1366215	DCT	TM	OK	284015	423783	0.577358	2.0665	5e-05	0.000105404	yes
XLOC_004064	XLOC_004064	TcSYL_0105450	TcX10_chr15:245270-246507	DCT	TM	OK	128268	186542	0.540336	1.79806	5e-05	0.000105404	yes
XLOC_004170	XLOC_004170	TcSYL_0106990	TcX10_chr15:508730-510291	DCT	TM	OK	152125	221086	0.539352	1.90804	5e-05	0.000105404	yes
XLOC_004157	XLOC_004157	TcSYL_0106860	TcX10_chr15:443799-444808	DCT	TM	OK	255792	1041.89	8.67001	8.98444	5e-05	0.000105404	yes
XLOC_003621	XLOC_003621	TcSYL_0100750	TcX10_chr14:540943-541946	DCT	TM	OK	209868	466601	7.79656	7.88568	5e-05	0.000105404	yes
XLOC_015125	XLOC_015125	TcSYL_0186830	TcX10_chr41:25126-26510	DCT	TM	OK	796157	917.83	6.84903	1.28094	5e-05	0.000105404	yes
XLOC_002155	XLOC_002155	TcSYL_0083760	TcX10_chr11:41937-43621	DCT	TM	OK	0.90024	704885	6.29094	5.866	5e-05	0.000105404	yes
XLOC_019210	XLOC_019210	TcSYL_0071120	TcX10_chr7:2053218-2058247	DCT	TM	OK	0.574252	380421	6.04977	6.87205	5e-05	0.000105404	yes
XLOC_003110	XLOC_003110	TcSYL_0094560	TcX10_chr13:403132-403946	DCT	TM	OK	229721	127782	5.79766	5.31775	5e-05	0.000105404	yes
XLOC_020371	XLOC_020371	TcSYL_0074920	TcX10_chr9:200587-200939	DCT	TM	OK	19165	824.01	5.42612	8.64019	5e-05	0.000105404	yes
XLOC_005443	XLOC_005443	TcSYL_0018740	TcX10_chr2:582254-583500	DCT	TM	OK	273103	115493	5.40221	6.38043	5e-05	0.000105404	yes
XLOC_013363	XLOC_013363	TcSYL_0030790	TcX10_chr4:86457-87304	DCT	TM	OK	349117	145771	5.38385	6.05803	5e-05	0.000105404	yes
XLOC_019893	XLOC_019893	TcSYL_0073790	TcX10_chr8:857295-858205	DCT	TM	OK	224828	85.33	5.24616	4.99101	5e-05	0.000105404	yes
XLOC_002892	XLOC_002892	TcSYL_0097070	TcX10_chr13:717350-717723	DCT	TM	OK	92847	340971	5.19865	6.38296	5e-05	0.000105404	yes
XLOC_009294	XLOC_009294	TcSYL_0026700	TcX10_chr3:1052980-1053404	DCT	TM	OK	12124	427027	5.13839	6.97658	5e-05	0.000105404	yes
XLOC_002694	XLOC_002694	TcSYL_0092780	TcX10_chr13:133239-134203	DCT	TM	OK	191173	670526	5.13234	4.80093	5e-05	0.000105404	yes
XLOC_009484	XLOC_009484	TcSYL_0022650	TcX10_chr3:144825-145267	DCT	TM	OK	201299	655.58	5.02536	6.85132	5e-05	0.000105404	yes
XLOC_008309	XLOC_008309	TcSYL_0139990	TcX10_chr26:344156-344523	DCT	TM	OK	33232	1069.94	5.00881	9.48591	5e-05	0.000105404	yes
XLOC_011725	XLOC_011725	TcSYL_0167080	TcX10_chr35:292746-293212	DCT	TM	OK	605437	187942	4.95617	5.3665	5e-05	0.000105404	yes
XLOC_020378	XLOC_020378	TcSYL_0074990	TcX10_chr9:234725-235215	DCT	TM	OK	109919	341016	4.95533	6.63667	5e-05	0.000105404	yes
XLOC_007376	XLOC_007376	TcSYL_0131060	TcX10_chr23:514843-515342	DCT	TM	OK	119718	370.5	4.95177	5.84573	5e-05	0.000105404	yes
XLOC_002053	XLOC_002053	TcSYL_0087960	TcX10_chr11:825858-826540	DCT	TM	OK	427898	127.05	4.89198	5.33459	5e-05	0.000105404	yes
XLOC_004361	XLOC_004361	TcSYL_0109870	TcX10_chr16:378247-379112	DCT	TM	OK	250625	684158	4.77073	4.75854	5e-05	0.000105404	yes
XLOC_005313	XLOC_005313	TcSYL_0016290	TcX10_chr2:406122-406636	DCT	TM	OK	818174	220001	4.74896	6.11595	5e-05	0.000105404	yes
XLOC_012194	XLOC_012194	TcSYL_0173010	TcX10_chr37:202987-203780	DCT	TM	OK	355132	913497	4.68497	5.14715	5e-05	0.000105404	yes
XLOC_007796	XLOC_007796	TcSYL_0133450	TcX10_chr24:60523-61151	DCT	TM	OK	67791	174.31	4.68442	5.93949	5e-05	0.000105404	yes
XLOC_002463	XLOC_002463	TcSYL_0090920	TcX10_chr12:388507-393098	DCT	TM	OK	0.690559	167251	4.59811	5.40941	5e-05	0.000105404	yes
XLOC_011860	XLOC_011860	TcSYL_0169250	TcX10_chr36:161634-162229	DCT	TM	OK	38031	882234	4.53591	4.44225	5e-05	0.000105404	yes
XLOC_012183	XLOC_012183	TcSYL_0172810	TcX10_chr37:185274-186874	DCT	TM	OK	208977	468434	4.48643	5.23831	5e-05	0.000105404	yes
XLOC_006574	XLOC_006574	TcSYL_0122800	TcX10_chr21:427616-428337	DCT	TM	OK	316942	708598	4.48268	4.56597	5e-05	0.000105404	yes
XLOC_004712	XLOC_004712	TcSYL_0112760	TcX10_chr18:57924-58324	DCT	TM	OK	449481	994.08	4.46703	7.51073	5e-05	0.000105404	yes
XLOC_005354	XLOC_005354	TcSYL_0017050	TcX10_chr2:455355-456139	DCT	TM	OK	855981	181749	4.40822	6.65664	5e-05	0.000105404	yes
XLOC_008909	XLOC_008909	TcSYL_0147870	TcX10_chr29:349312-350345	DCT	TM	OK	46993	941466	4.32439	5.75333	5e-05	0.000105404	yes
XLOC_006557	XLOC_006557	TcSYL_0122570	TcX10_chr21:413032-413615	DCT	TM	OK	183101	353.63	4.27152	7.52815	5e-05	0.000105404	yes
XLOC_016238	XLOC_016238	TcSYL_0196490	TcX10_chr43:137282-138237	DCT	TM	OK	232278	401598	4.11183	4.08572	5e-05	0.000105404	yes
XLOC_013338	XLOC_013338	TcSYL_0030440	TcX10_chr4:62144-62604	DCT	TM	OK	146098	244021	4.06199	6.00015	5e-05	0.000105404	yes
XLOC_012244	XLOC_012244	TcSYL_0174440	TcX10_chr37:359844-360784	DCT	TM	OK	107971	178159	4.04445	6.78985	5e-05	0.000105404	yes
XLOC_015676	XLOC_015676	TcSYL_0194440	TcX10_chr42:792323-792639	DCT	TM	OK	153629	253026	4.04176	5.23944	5e-05	0.000105404	yes
XLOC_002581	XLOC_002581	TcSYL_0089460	TcX10_chr12:274135-274883	DCT	TM	OK	6708	109.35	4.02692	4.84687	5e-05	0.000105404	yes
XLOC_015306	XLOC_015306	TcSYL_0189950	TcX10_chr41:359094-359668	DCT	TM	OK	149192	242462	4.02252	6.37681	5e-05	0.000105404	yes
XLOC_020213	XLOC_020213	TcSYL_0078600	TcX10_chr9:767137-769031	DCT	TM	OK	114313	183501	4.00473	3.91908	5e-05	0.000105404	yes
XLOC_014140	XLOC_014140	TcSYL_0031110	TcX10_chr4:106268-107031	DCT	TM	OK	57421	899862	3.97005	5.0981	5e-05	0.000105404	yes
XLOC_015261	XLOC_015261	TcSYL_0189250	TcX10_chr41:315256-315707	DCT	TM	OK	796077	122033	3.93822	4.77339	5e-05	0.000105404	yes
XLOC_009898	XLOC_009898	TcSYL_0150700	TcX10_chr30:159007-159728	DCT	TM	OK	375887	56002	3.89711	4.07476	5e-05	0.000105404	yes
XLOC_000270	XLOC_000270	TcSYL_0004900	TcX10_chr1:1315054-1315640	DCT	TM	OK	111331	163369	3.87521	5.64963	5e-05	0.000105404	yes
XLOC_015671	XLOC_015671	TcSYL_0194390	TcX10_chr42:777114-777553	DCT	TM	OK	23323	324814	3.79979	5.37981	5e-05	0.000105404	yes
XLOC_011965	XLOC_011965	TcSYL_0170660	TcX10_chr36:417079-417392	DCT	TM	OK	281916	389889	3.78972	6.34568	5e-05	0.000105404	yes
XLOC_007139	XLOC_007139	TcSYL_0130220	TcX10_chr23:455932-456716	DCT	TM	OK	16493	225925	3.77592	6.82703	5e-05	0.000105404	yes
XLOC_012220	XLOC_012220	TcSYL_0173700	TcX10_chr37:272665-273014	DCT	TM	OK	261086	357481	3.77527	6.30915	5e-05	0.000105404	yes
XLOC_013375	XLOC_013375	TcSYL_0030970	TcX10_chr4:98040-98893	DCT	TM	OK	481069	634485	3.72127	4.59821	5e-05	0.000105404	yes
XLOC_017409	XLOC_017409	TcSYL_0047500	TcX10_chr5:886075-887198	DCT	TM	OK	509125	658931	3.69404	5.07012	5e-05	0.000105404	yes
XLOC_010584	XLOC_010584	TcSYL_0156580	TcX10_chr31:356231-356859	DCT	TM	OK	560637	718037	3.67892	4.14195	5e-05	0.000105404	yes
XLOC_005094	XLOC_005094	TcSYL_0116230	TcX10_chr19:625644-626068	DCT	TM	OK	907554	111.42	3.61788	4.20677	5e-05	0.000105404	yes
XLOC_006238	XLOC_006238	TcSYL_0118410	TcX10_chr20:318399-319426	DCT	TM	OK	219052	261032	3.57488	7.97561	5e-05	0.000105404	yes
XLOC_002103	XLOC_002103	TcSYL_0088620	TcX10_chr11:995493-996436	DCT	TM	OK	778723	913491	3.55221	5.45116	5e-05	0.000105404	yes
XLOC_009728	XLOC_009728	TcSYL_0028620	TcX10_chr3:1513467-1514140	DCT	TM	OK	643489	750662	3.54418	4.37718	5e-05	0.000105404	yes
XLOC_013219	XLOC_013219	TcSYL_0182290	TcX10_chr39:355884-356887	DCT	TM	OK	472148	54959	3.54105	4.63034	5e-05	0.000105404	yes
XLOC_009004	XLOC_009004	TcSYL_0147250	TcX10_chr29:205068-205342	DCT	TM	OK	295829	3376.39	3.51264	7.80676	5e-05	0.000105404	yes
XLOC_020250	XLOC_020250	TcSYL_0078990	TcX10_chr9:941386-941813	DCT	TM	OK	302471	342969	3.50321	6.47453	5e-05	0.000105404	yes
XLOC_010931	XLOC_010931	TcSYL_0159380	TcX10_chr32:593604-594649	DCT	TM	OK	443782	49718	3.48585	4.5028	5e-05	0.000105404	yes
XLOC_005292	XLOC_005292	TcSYL_0016000	TcX10_chr2:387275-388140	DCT	TM	OK	722852	80188	3.47161	5.02723	5e-05	0.000105404	yes
XLOC_009279	XLOC_009279	TcSYL_0026480	TcX10_chr3:1036304-1037715	DCT	TM	OK	559109	604579	3.43473	5.42048	5e-05	0.000105404	yes
XLOC_007546	XLOC_007546	TcSYL_0133500	TcX10_chr24:63054-63799	DCT	TM	OK	649022	698751	3.42844	4.4643	5e-05	0.000105404	yes
XLOC_000486	XLOC_000486	TcSYL_0009800	TcX10_chr1:1958161-1958561	DCT	TM	OK	145631	156685	3.42748	4.82926	5e-05	0.000105404	yes
XLOC_001478	XLOC_001478	TcSYL_0080670	TcX10_chr10:292331-293112	DCT	TM	OK	435505	465058	3.41665	8.55276	5e-05	0.000105404	yes
XLOC_001674	XLOC_001674	TcSYL_0080360	TcX10_chr10:136782-138904	DCT	TM	OK	425476	44683	3.39258	5.69703	5e-05	0.000105404	yes
XLOC_003593	XLOC_003593	TcSYL_0100200	TcX10_chr14:404551-405110	DCT	TM	OK	140354	147285	3.39147	5.14544	5e-05	0.000105404	yes
XLOC_009513	XLOC_009513	TcSYL_0022950	TcX10_chr3:236394-236761	DCT	TM	OK	227927	235286	3.36777	5.21744	5e-05	0.000105404	yes
XLOC_009356	XLOC_009356	TcSYL_0027660	TcX10_chr3:1385556-1386118	DCT	TM	OK	233697	239902	3.35973	5.59926	5e-05	0.000105404	yes
XLOC_014706	XLOC_014706	TcSYL_0043060	TcX10_chr4:1286102-1286862	DCT	TM	OK	11199	113697	3.34375	5.36296	5e-05	0.000105404	yes
XLOC_020063	XLOC_020063	TcSYL_0076490	TcX10_chr9:604259-604908	DCT	TM	OK	246837	247886	3.32804	6.22115	5e-05	0.000105404	yes
XLOC_003862	XLOC_003862	TcSYL_0105690	TcX10_chr15:262025-262500	DCT	TM	OK	93687	938467	3.32439	3.21234	5e-05	0.000105404	yes
XLOC_014664	XLOC_014664	TcSYL_0042510	TcX10_chr4:1228165-1228706	DCT	TM	OK	351744	340188	3.27373	6.98484	5e-05	0.000105404	yes
XLOC_008208	XLOC_008208	TcSYL_0140860	TcX10_chr26:593331-593956	DCT	TM	OK	194618	187736	3.26999	5.36032	5e-05	0.000105404	yes
XLOC_000968	XLOC_000968	TcSYL_0003930	TcX10_chr1:1079806-1080173	DCT	TM	OK	756419	725716	3.26215	7.9665	5e-05	0.000105404	yes
XLOC_018321	XLOC_018321	TcSYL_0055090	TcX10_chr6:751503-752632	DCT	TM	OK	395614	378274	3.25727	4.09767	5e-05	0.000105404	yes
XLOC_009647	XLOC_009647	TcSYL_0026660	TcX10_chr3:1051205-1051803	DCT	TM	OK	143023	136215	3.25157	4.63378	5e-05	0.000105404	yes
XLOC_005788	XLOC_005788	TcSYL_0018170	TcX10_chr2:543521-545106	DCT	TM	OK	52455	493352	3.23347	5.30189	5e-05	0.000105404	yes
XLOC_009394	XLOC_009394	TcSYL_0028350	TcX10_chr3:1496217-1497136	DCT	TM	OK	330957	308418	3.22017	3.08234	5e-05	0.000105404	yes
XLOC_006031	XLOC_006031	TcSYL_0118090	TcX10_chr20:147752-149385	DCT	TM	OK	195324	179839	3.20276	3.64338	5e-05	0.000105404	yes
XLOC_015231	XLOC_015231	TcSYL_0188850	TcX10_chr41:286583-287016	DCT	TM	OK	145241	132826	3.19302	4.5237	5e-05	0.000105404	yes
XLOC_000808	XLOC_000808	TcSYL_0000850	TcX10_chr1:331393-332249	DCT	TM	OK	117738	106952	3.18331	5.47207	5e-05	0.000105404	yes
XLOC_001729	XLOC_001729	TcSYL_0082460	TcX10_chr10:715356-716161	DCT	TM	OK	929401	843397	3.18184	4.87588	5e-05	0.000105404	yes
XLOC_003231	XLOC_003231	TcSYL_0097090	TcX10_chr13:718443-719098	DCT	TM	OK	136887	123829	3.17729	4.70497	5e-05	0.000105404	yes
XLOC_005360	XLOC_005360	TcSYL_0017110	TcX10_chr2:459849-460327	DCT	TM	OK	910002	814835	3.16257	7.76829	5e-05	0.000105404	yes
XLOC_014657	XLOC_014657	TcSYL_0042410	TcX10_chr4:1220383-1220885	DCT	TM	OK	153717	135898	3.14417	4.65716	5e-05	0.000105404	yes
XLOC_016760	XLOC_016760	TcSYL_0203240	TcX10_chr46:248534-248973	DCT	TM	OK	386129	338996	3.13411	5.25891	5e-05	0.000105404	yes
XLOC_004540	XLOC_004540	TcSYL_0112520	TcX10_chr16:1438440-1438909	DCT	TM	OK	412861	357.34	3.11357	6.61191	5e-05	0.000105404	yes
XLOC_015549	XLOC_015549	TcSYL_0192120	TcX10_chr42:481682-482535	DCT	TM	OK	101704	868497	3.09414	4.9903	5e-05	0.000105404	yes
XLOC_013413	XLOC_013413	TcSYL_0031590	TcX10_chr4:139796-140418	DCT	TM	OK	13151	110772	3.07435	4.37818	5e-05	0.000105404	yes
XLOC_003197	XLOC_003197	TcSYL_0096600	TcX10_chr13:679778-680193	DCT	TM	OK	138233	114917	3.05541	4.1304	5e-05	0.000105404	yes
XLOC_002232	XLOC_002232	TcSYL_0085160	TcX10_chr11:377201-377793	DCT	TM	OK	200286	164378	3.03688	5.37772	5e-05	0.000105404	yes
XLOC_006493	XLOC_006493	TcSYL_0121750	TcX10_chr21:166397-166722	DCT	TM	OK	264251	214.83	3.02322	4.78738	5e-05	0.000105404	yes
XLOC_010823	XLOC_010823	TcSYL_0157510	TcX10_chr32:448526-448974	DCT	TM	OK	219484	176.63	3.00854	4.10962	5e-05	0.000105404	yes
XLOC_004661	XLOC_004661	TcSYL_0110870	TcX10_chr16:880458-880969	DCT	TM	OK	256135	202104	2.98012	4.85725	5e-05	0.000105404	yes
XLOC_004789	XLOC_004789	TcSYL_0114120	TcX10_chr18:527217-527650	DCT	TM	OK	269663	211.27	2.96986	4.35728	5e-05	0.000105404	yes
XLOC_006707	XLOC_006707	TcSYL_0126010	TcX10_chr22:518792-519081	DCT	TM	OK	705318	551847	2.96792	3.98241	5e-05	0.000105404	yes
XLOC_009498	XLOC_009498	TcSYL_0022790	TcX10_chr3:181409-181926	DCT	TM	OK	156127	121715	2.96272	3.93482	5e-05	0.000105404	yes
XLOC_005174	XLOC_005174	TcSYL_0117220	TcX10_chr19:744810-745327	DCT	TM	OK	129715	101047	2.96161	4.47123	5e-05	0.000105404	yes
XLOC_005988	XLOC_005988	TcSYL_0117660	TcX10_chr20:31791-32257	DCT	TM	OK	135948	105478	2.95582	4.12038	5e-05	0.000105404	yes
XLOC_020302	XLOC_020302	TcSYL_0079620	TcX10_chr9:1061603-1062063	DCT	TM	OK	461823	358019	2.95462	6.55504	5e-05	0.000105404	yes
XLOC_003733	XLOC_003733	TcSYL_0102580	TcX10_chr14:822447-823054	DCT	TM	OK	629677	486721	2.95041	3.58895	5e-05	0.000105404	yes
XLOC_009829	XLOC_009829	TcSYL_0149410	TcX10_chr30:79318-80675	DCT	TM	OK	384497	296431	2.94665	3.7724	5e-05	0.000105404	yes
XLOC_019981	XLOC_019981	TcSYL_0072700	TcX10_chr8:213042-214789	DCT	TM	OK	271333	208723	2.94345	3.83873	5e-05	0.000105404	yes
XLOC_012085	XLOC_012085	TcSYL_0171500	TcX10_chr37:59656-60143	DCT	TM	OK	126152	968283	2.94026	7.84033	5e-05	0.000105404	yes
XLOC_000918	XLOC_000918	TcSYL_0003070	TcX10_chr1:877876-878381	DCT	TM	OK	902579	688458	2.93124	3.57855	5e-05	0.000105404	yes
XLOC_010779	XLOC_010779	TcSYL_0159980	TcX10_chr32:938990-939723	DCT	TM	OK	871063	662339	2.92672	4.12962	5e-05	0.000105404	yes
XLOC_019351	XLOC_019351	TcSYL_0061990	TcX10_chr7:156438-156889	DCT	TM	OK	366621	278468	2.92515	4.93797	5e-05	0.000105404	yes
XLOC_018852	XLOC_018852	TcSYL_0064480	TcX10_chr7:1073685-1074184	DCT	TM	OK	557805	420119	2.91296	6.21473	5e-05	0.000105404	yes
XLOC_012908	XLOC_012908	TcSYL_0181360	TcX10_chr39:277272-278185	DCT	TM	OK	797734	596799	2.90327	4.16813	5e-05	0.000105404	yes
XLOC_012890	XLOC_012890	TcSYL_0180950	TcX10_chr39:238700-239715	DCT	TM	OK	292309	217698	2.89676	6.83388	5e-05	0.000105404	yes
XLOC_019878	XLOC_019878	TcSYL_0073640	TcX10_chr8:820881-821545	DCT	TM	OK	11199	831134	2.89172	3.9819	5e-05	0.000105404	yes
XLOC_007364	XLOC_007364	TcSYL_0130900	TcX10_chr23:500143-500642	DCT	TM	OK	107603	79232	2.88036	3.78578	5e-05	0.000105404	yes
XLOC_003154	XLOC_003154	TcSYL_0095960	TcX10_chr13:625522-626582	DCT	TM	OK	141644	103703	2.87211	5.72309	5e-05	0.000105404	yes
XLOC_002556	XLOC_002556	TcSYL_0092390	TcX10_chr12:1000786-1001288	DCT	TM	OK	112124	802248	2.83896	3.78444	5e-05	0.000105404	yes
XLOC_009362	XLOC_009362	TcSYL_0027720	TcX10_chr3:1401888-1402576	DCT	TM	OK	105291	740401	2.81393	4.13015	5e-05	0.000105404	yes
XLOC_009924	XLOC_009924	TcSYL_0151100	TcX10_chr30:234712-236192	DCT	TM	OK	373037	259215	2.79676	3.72211	5e-05	0.000105404	yes
XLOC_004485	XLOC_004485	TcSYL_0111970	TcX10_chr16:1245306-1246630	DCT	TM	OK	855913	593719	2.79424	4.91301	5e-05	0.000105404	yes
XLOC_009612	XLOC_009612	TcSYL_0025410	TcX10_chr3:960180-960919	DCT	TM	OK	595471	412763	2.79321	3.43888	5e-05	0.000105404	yes
XLOC_012648	XLOC_012648	TcSYL_0178080	TcX10_chr38:389043-389821	DCT	TM	OK	195515	134007	2.77696	5.14855	5e-05	0.000105404	yes
XLOC_019988	XLOC_019988	TcSYL_0072810	TcX10_chr8:229484-230901	DCT	TM	OK	547772	373745	2.77041	4.22279	5e-05	0.000105404	yes
XLOC_018829	XLOC_018829	TcSYL_0064240	TcX10_chr7:976869-977635	DCT	TM	OK	184248	124016	2.75081	5.21258	5e-05	0.000105404	yes
XLOC_016551	XLOC_016551	TcSYL_0200680	TcX10_chr44:92954-93315	DCT	TM	OK	513967	344423	2.74443	4.30265	5e-05	0.000105404	yes
XLOC_012411	XLOC_012411	TcSYL_0174190	TcX10_chr37:311578-312194	DCT	TM	OK	262045	173814	2.72965	4.84161	5e-05	0.000105404	yes
XLOC_004671	XLOC_004671	TcSYL_0110970	TcX10_chr16:919387-920024	DCT	TM	OK	251969	164277	2.70481	4.8278	5e-05	0.000105404	yes
XLOC_004173	XLOC_004173	TcSYL_0107020	TcX10_chr15:512579-513180	DCT	TM	OK	214498	136.99	2.67503	4.83376	5e-05	0.000105404	yes
XLOC_007916	XLOC_007916	TcSYL_0135750	TcX10_chr24:241213-242642	DCT	TM	OK	365614	233428	2.67458	3.56469	5e-05	0.000105404	yes
XLOC_011970	XLOC_011970	TcSYL_0170710	TcX10_chr36:425807-426345	DCT	TM	OK	954848	604028	2.66127	3.388	5e-05	0.000105404	yes
XLOC_011960	XLOC_011960	TcSYL_0170610	TcX10_chr36:411736-412268	DCT	TM	OK	68833	428529	2.63822	6.27046	5e-05	0.000105404	yes
XLOC_019352	XLOC_019352	TcSYL_0062000	TcX10_chr7:157255-158285	DCT	TM	OK	16183	999211	2.62631	5.18767	5e-05	0.000105404	yes
XLOC_020288	XLOC_020288	TcSYL_0079410	TcX10_chr9:1037816-1038138	DCT	TM	OK	432974	267115	2.62511	5.02389	5e-05	0.000105404	yes
XLOC_009066	XLOC_009066	TcSYL_0023240	TcX10_chr3:368761-369533	DCT	TM	OK	314707	193763	2.62221	5.83692	5e-05	0.000105404	yes
XLOC_008887	XLOC_008887	TcSYL_0147520	TcX10_chr29:324652-325586	DCT	TM	OK	123195	75598	2.61741	4.66791	5e-05	0.000105404	yes
XLOC_007404	XLOC_007404	TcSYL_0131440	TcX10_chr23:539688-541123	DCT	TM	OK	117349	718364	2.61391	5.23511	5e-05	0.000105404	yes
XLOC_004184	XLOC_004184	TcSYL_0107130	TcX10_chr15:570947-571401	DCT	TM	OK	321168	196203	2.61095	4.27185	5e-05	0.000105404	yes
XLOC_004717	XLOC_004717	TcSYL_0112810	TcX10_chr18:101892-102361	DCT	TM	OK	227937	137741	2.59525	4.36361	5e-05	0.000105404	yes
XLOC_007993	XLOC_007993	TcSYL_0137160	TcX10_chr24:335929-336581	DCT	TM	OK	763022	456862	2.58196	3.20239	5e-05	0.000105404	yes
XLOC_006536	XLOC_006536	TcSYL_0122290	TcX10_chr21:322438-323408	DCT	TM	OK	551285	329718	2.58036	7.27016	5e-05	0.000105404	yes
XLOC_020292	XLOC_020292	TcSYL_0079450	TcX10_chr9:1049317-1050287	DCT	TM	OK	208303	124289	2.57695	5.40319	5e-05	0.000105404	yes
XLOC_006800	XLOC_006800	TcSYL_0124230	TcX10_chr22:69571-70754	DCT	TM	OK	360247	214902	2.57662	3.12414	5e-05	0.000105404	yes
XLOC_003258	XLOC_003258	TcSYL_0097380	TcX10_chr13:739835-740418	DCT	TM	OK	202434	119.94	2.56679	4.01872	5e-05	0.000105404	yes
XLOC_004391	XLOC_004391	TcSYL_0110330	TcX10_chr16:430253-430815	DCT	TM	OK	17854	105344	2.56079	4.20381	5e-05	0.000105404	yes
XLOC_015201	XLOC_015201	TcSYL_0188440	TcX10_chr41:254066-254508	DCT	TM	OK	167855	984326	2.55192	3.63598	5e-05	0.000105404	yes
XLOC_000219	XLOC_000219	TcSYL_0004310	TcX10_chr1:1156214-1156818	DCT	TM	OK	223689	131.07	2.55077	4.73856	5e-05	0.000105404	yes
XLOC_003230	XLOC_003230	TcSYL_0097080	TcX10_chr13:717769-718256	DCT	TM	OK	243037	141989	2.54654	3.882	5e-05	0.000105404	yes
XLOC_006504	XLOC_006504	TcSYL_0121880	TcX10_chr21:259462-259832	DCT	TM	OK	367618	214569	2.54517	4.56517	5e-05	0.000105404	yes
XLOC_008098	XLOC_008098	TcSYL_0138850	TcX10_chr25:393484-394025	DCT	TM	OK	177474	102863	2.53504	3.62915	5e-05	0.000105404	yes
XLOC_015179	XLOC_015179	TcSYL_0188150	TcX10_chr41:232021-233705	DCT	TM	OK	70841	409375	2.53077	4.65347	5e-05	0.000105404	yes
XLOC_006473	XLOC_006473	TcSYL_0121550	TcX10_chr21:47287-47972	DCT	TM	OK	105993	602118	2.50608	3.62737	5e-05	0.000105404	yes
XLOC_016285	XLOC_016285	TcSYL_0197100	TcX10_chr43:184698-185800	DCT	TM	OK	942683	534048	2.50212	4.09095	5e-05	0.000105404	yes
XLOC_015249	XLOC_015249	TcSYL_0189070	TcX10_chr41:302223-303112	DCT	TM	OK	689725	387985	2.49191	3.30773	5e-05	0.000105404	yes
XLOC_000178	XLOC_000178	TcSYL_0003760	TcX10_chr1:1068082-1068563	DCT	TM	OK	439099	246482	2.48887	4.55414	5e-05	0.000105404	yes
XLOC_005361	XLOC_005361	TcSYL_0017120	TcX10_chr2:460433-462303	DCT	TM	OK	280706	156232	2.47655	7.13198	5e-05	0.000105404	yes
XLOC_003199	XLOC_003199	TcSYL_0096630	TcX10_chr13:681223-681692	DCT	TM	OK	199585	109672	2.45812	3.87255	5e-05	0.000105404	yes
XLOC_015258	XLOC_015258	TcSYL_0189180	TcX10_chr41:311107-311522	DCT	TM	OK	378384	206343	2.44712	4.66408	5e-05	0.000105404	yes
XLOC_017481	XLOC_017481	TcSYL_0048220	TcX10_chr5:1093780-1094177	DCT	TM	OK	207672	112493	2.43746	3.67954	5e-05	0.000105404	yes
XLOC_004214	XLOC_004214	TcSYL_0107450	TcX10_chr15:627703-628535	DCT	TM	OK	301087	163014	2.43675	5.37567	5e-05	0.000105404	yes
XLOC_000538	XLOC_000538	TcSYL_0010460	TcX10_chr1:2009732-2010216	DCT	TM	OK	12926	69729	2.43148	2.77676	5e-05	0.000105404	yes
XLOC_005228	XLOC_005228	TcSYL_0015050	TcX10_chr2:208529-209010	DCT	TM	OK	247185	133153	2.42942	3.62527	5e-05	0.000105404	yes
XLOC_019750	XLOC_019750	TcSYL_0071300	TcX10_chr7:2075283-2089066	DCT	TM	OK	583704	314171	2.42824	7.83568	5e-05	0.000105404	yes
XLOC_015507	XLOC_015507	TcSYL_0191220	TcX10_chr42:276978-277315	DCT	TM	OK	562541	301069	2.42007	3.6106	5e-05	0.000105404	yes
XLOC_004278	XLOC_004278	TcSYL_0108270	TcX10_chr15:801694-802067	DCT	TM	OK	581264	309641	2.41333	4.036	5e-05	0.000105404	yes
XLOC_008997	XLOC_008997	TcSYL_0147150	TcX10_chr29:111186-111742	DCT	TM	OK	287046	152714	2.41148	4.20339	5e-05	0.000105404	yes
XLOC_013369	XLOC_013369	TcSYL_0030880	TcX10_chr4:90744-92560	DCT	TM	OK	8968	47647	2.40953	4.96872	5e-05	0.000105404	yes
XLOC_001292	XLOC_001292	TcSYL_0010890	TcX10_chr1:2120688-2121739	DCT	TM	OK	146133	761869	2.38227	4.68638	5e-05	0.000105404	yes
XLOC_000955	XLOC_000955	TcSYL_0003460	TcX10_chr1:976455-977077	DCT	TM	OK	109127	565586	2.37374	3.34645	5e-05	0.000105404	yes
XLOC_006412	XLOC_006412	TcSYL_0123220	TcX10_chr21:537950-538593	DCT	TM	OK	233571	120.17	2.36315	4.17901	5e-05	0.000105404	yes
XLOC_014020	XLOC_014020	TcSYL_0043890	TcX10_chr4:1347617-1348188	DCT	TM	OK	990805	506024	2.35253	3.08123	5e-05	0.000105404	yes
XLOC_020271	XLOC_020271	TcSYL_0079240	TcX10_chr9:987397-987962	DCT	TM	OK	492269	250811	2.34909	5.12583	5e-05	0.000105404	yes
XLOC_008045	XLOC_008045	TcSYL_0138290	TcX10_chr25:41575-41966	DCT	TM	OK	396989	201763	2.34549	3.63174	5e-05	0.000105404	yes
XLOC_011254	XLOC_011254	TcSYL_0162730	TcX10_chr33:298178-298506	DCT	TM	OK	440815	223771	2.34378	3.07311	5e-05	0.000105404	yes
XLOC_003172	XLOC_003172	TcSYL_0096260	TcX10_chr13:656473-657326	DCT	TM	OK	243463	123307	2.34048	4.77722	5e-05	0.000105404	yes
XLOC_007511	XLOC_007511	TcSYL_0132850	TcX10_chr23:643140-643486	DCT	TM	OK	472867	237121	2.32612	4.46399	5e-05	0.000105404	yes
XLOC_000449	XLOC_000449	TcSYL_0009180	TcX10_chr1:1920646-1921268	DCT	TM	OK	290203	144816	2.31908	4.3294	5e-05	0.000105404	yes
XLOC_008107	XLOC_008107	TcSYL_0138820	TcX10_chr25:232938-233404	DCT	TM	OK	293528	146332	2.31768	3.67288	5e-05	0.000105404	yes
XLOC_004976	XLOC_004976	TcSYL_0115750	TcX10_chr19:458782-459539	DCT	TM	OK	524091	260082	2.31108	5.84349	5e-05	0.000105404	yes
XLOC_003194	XLOC_003194	TcSYL_0096560	TcX10_chr13:677189-677859	DCT	TM	OK	807027	394123	2.28796	2.6728	5e-05	0.000105404	yes
XLOC_003534	XLOC_003534	TcSYL_0102780	TcX10_chr14:835806-836290	DCT	TM	OK	203481	993454	2.28756	3.19367	5e-05	0.000105404	yes
XLOC_020517	XLOC_020517	TcSYL_0076890	TcX10_chr9:632188-632582	DCT	TM	OK	318099	154367	2.27882	3.91957	5e-05	0.000105404	yes
XLOC_020232	XLOC_020232	TcSYL_0078800	TcX10_chr9:828345-829279	DCT	TM	OK	389835	187699	2.26749	5.72498	5e-05	0.000105404	yes
XLOC_001204	XLOC_001204	TcSYL_0008770	TcX10_chr1:1815773-1816692	DCT	TM	OK	61128	293686	2.26437	2.97735	5e-05	0.000105404	yes
XLOC_014030	XLOC_014030	TcSYL_0044170	TcX10_chr4:1420127-1420548	DCT	TM	OK	83975	403012	2.26279	4.87796	5e-05	0.000105404	yes
XLOC_003301	XLOC_003301	TcSYL_0097960	TcX10_chr13:776836-777380	DCT	TM	OK	523653	251105	2.26161	4.85704	5e-05	0.000105404	yes
XLOC_004019	XLOC_004019	TcSYL_0104790	TcX10_chr15:203489-204342	DCT	TM	OK	977041	466514	2.25543	6.94239	5e-05	0.000105404	yes
XLOC_015965	XLOC_015965	TcSYL_0195740	TcX10_chr43:81696-82219	DCT	TM	OK	11979	56956	2.24933	3.01444	5e-05	0.000105404	yes
XLOC_006513	XLOC_006513	TcSYL_0122010	TcX10_chr21:277610-279363	DCT	TM	OK	107111	508455	2.24702	4.76613	5e-05	0.000105404	yes
XLOC_017212	XLOC_017212	TcSYL_0047120	TcX10_chr5:711556-712013	DCT	TM	OK	390809	182978	2.22713	3.73936	5e-05	0.000105404	yes
XLOC_008979	XLOC_008979	TcSYL_0146950	TcX10_chr29:94264-94745	DCT	TM	OK	385694	177935	2.20582	3.78986	5e-05	0.000105404	yes
XLOC_017814	XLOC_017814	TcSYL_0055140	TcX10_chr6:755150-755688	DCT	TM	OK	179151	825051	2.20331	3.05684	5e-05	0.000105404	yes
XLOC_004885	XLOC_004885	TcSYL_0113240	TcX10_chr18:336977-337368	DCT	TM	OK	602509	276739	2.19947	3.82842	5e-05	0.000105404	yes
XLOC_013033	XLOC_013033	TcSYL_0178520	TcX10_chr39:7051-7637	DCT	TM	OK	158427	726419	2.19699	3.11886	5e-05	0.000105404	yes
XLOC_004775	XLOC_004775	TcSYL_0113980	TcX10_chr18:494837-495372	DCT	TM	OK	27226	124538	2.19353	3.58313	5e-05	0.000105404	yes
XLOC_005484	XLOC_005484	TcSYL_0019940	TcX10_chr2:983284-983738	DCT	TM	OK	227664	103.43	2.18368	3.46388	5e-05	0.000105404	yes
XLOC_000283	XLOC_000283	TcSYL_0005040	TcX10_chr1:1343202-1344619	DCT	TM	OK	15694	711587	2.18083	4.82008	5e-05	0.000105404	yes
XLOC_001676	XLOC_001676	TcSYL_0080380	TcX10_chr10:142536-143620	DCT	TM	OK	341438	154137	2.17452	5.60556	5e-05	0.000105404	yes
XLOC_010874	XLOC_010874	TcSYL_0158460	TcX10_chr32:506259-506884	DCT	TM	OK	396389	178.72	2.17271	4.45135	5e-05	0.000105404	yes
XLOC_002894	XLOC_002894	TcSYL_0097320	TcX10_chr13:736117-736574	DCT	TM	OK	192835	867594	2.16966	3.25217	5e-05	0.000105404	yes
XLOC_000297	XLOC_000297	TcSYL_0005220	TcX10_chr1:1357624-1358120	DCT	TM	OK	222144	998882	2.16882	3.58334	5e-05	0.000105404	yes
XLOC_020505	XLOC_020505	TcSYL_0076450	TcX10_chr9:601642-602087	DCT	TM	OK	62968	282639	2.16627	4.21444	5e-05	0.000105404	yes
XLOC_005346	XLOC_005346	TcSYL_0016940	TcX10_chr2:447326-447801	DCT	TM	OK	902592	404977	2.16569	5.12285	5e-05	0.000105404	yes
XLOC_003829	XLOC_003829	TcSYL_0104350	TcX10_chr15:130290-130855	DCT	TM	OK	136869	610762	2.15782	3.13076	5e-05	0.000105404	yes
XLOC_009088	XLOC_009088	TcSYL_0023460	TcX10_chr3:577520-578625	DCT	TM	OK	199461	886987	2.15281	4.82017	5e-05	0.000105404	yes
XLOC_013069	XLOC_013069	TcSYL_0179020	TcX10_chr39:42524-44709	DCT	TM	OK	178488	793289	2.15202	5.75601	5e-05	0.000105404	yes
XLOC_014734	XLOC_014734	TcSYL_0043380	TcX10_chr4:1314455-1315293	DCT	TM	OK	444782	197016	2.14714	5.42048	5e-05	0.000105404	yes
XLOC_000921	XLOC_000921	TcSYL_0003100	TcX10_chr1:881947-882509	DCT	TM	OK	471133	208664	2.14698	4.50228	5e-05	0.000105404	yes
XLOC_008076	XLOC_008076	TcSYL_0138610	TcX10_chr25:160551-161620	DCT	TM	OK	185849	818308	2.13852	4.34965	5e-05	0.000105404	yes
XLOC_005867	XLOC_005867	TcSYL_0019510	TcX10_chr2:846693-847525	DCT	TM	OK	182181	796628	2.12853	3.85395	5e-05	0.000105404	yes
XLOC_019976	XLOC_019976	TcSYL_0072620	TcX10_chr8:201862-203174	DCT	TM	OK	167326	725412	2.11614	4.65685	5e-05	0.000105404	yes
XLOC_018877	XLOC_018877	TcSYL_0064850	TcX10_chr7:1121103-1121848	DCT	TM	OK	207357	895434	2.11047	4.07251	5e-05	0.000105404	yes
XLOC_016270	XLOC_016270	TcSYL_0196910	TcX10_chr43:169007-169539	DCT	TM	OK	17.93	771791	2.10583	3.2755	5e-05	0.000105404	yes
XLOC_001296	XLOC_001296	TcSYL_0010930	TcX10_chr1:2133996-2134495	DCT	TM	OK	35.66	152715	2.09847	4.18374	5e-05	0.000105404	yes
XLOC_003201	XLOC_003201	TcSYL_0096650	TcX10_chr13:683285-684036	DCT	TM	OK	191298	81532	2.09154	3.67659	5e-05	0.000105404	yes
XLOC_018881	XLOC_018881	TcSYL_0064890	TcX10_chr7:1129140-1129771	DCT	TM	OK	263138	111369	2.08146	4.07461	5e-05	0.000105404	yes
XLOC_001667	XLOC_001667	TcSYL_0080290	TcX10_chr10:88849-89429	DCT	TM	OK	264244	111571	2.07802	3.48848	5e-05	0.000105404	yes
XLOC_011420	XLOC_011420	TcSYL_0165420	TcX10_chr34:443633-444006	DCT	TM	OK	318121	133568	2.06993	3.50006	5e-05	0.000105404	yes
XLOC_000266	XLOC_000266	TcSYL_0004860	TcX10_chr1:1277679-1278358	DCT	TM	OK	128459	537468	2.06487	3.16176	5e-05	0.000105404	yes
XLOC_003143	XLOC_003143	TcSYL_0095850	TcX10_chr13:600212-600927	DCT	TM	OK	338985	141456	2.06106	4.35052	5e-05	0.000105404	yes
XLOC_011687	XLOC_011687	TcSYL_0168900	TcX10_chr35:525179-525378	DCT	TM	OK	639792	2669.3	2.06079	2.49572	5e-05	0.000105404	yes
XLOC_018826	XLOC_018826	TcSYL_0064210	TcX10_chr7:973042-973346	DCT	TM	OK	888293	370018	2.05849	3.30991	5e-05	0.000105404	yes
XLOC_007418	XLOC_007418	TcSYL_0131600	TcX10_chr23:551287-552245	DCT	TM	OK	334515	139326	2.05833	4.93598	5e-05	0.000105404	yes
XLOC_006518	XLOC_006518	TcSYL_0122080	TcX10_chr21:283279-284996	DCT	TM	OK	15487	643345	2.05453	4.88812	5e-05	0.000105404	yes
XLOC_012171	XLOC_012171	TcSYL_0172680	TcX10_chr37:176058-177418	DCT	TM	OK	222243	918698	2.04745	4.99897	5e-05	0.000105404	yes
XLOC_017167	XLOC_017167	TcSYL_0046670	TcX10_chr5:584230-584804	DCT	TM	OK	479072	198025	2.04737	4.34654	5e-05	0.000105404	yes
XLOC_014492	XLOC_014492	TcSYL_0039900	TcX10_chr4:916188-916975	DCT	TM	OK	307742	127196	2.04726	4.38511	5e-05	0.000105404	yes
XLOC_011720	XLOC_011720	TcSYL_0167030	TcX10_chr35:278559-278896	DCT	TM	OK	495314	204429	2.04518	3.94011	5e-05	0.000105404	yes
XLOC_020290	XLOC_020290	TcSYL_0079430	TcX10_chr9:1046740-1047107	DCT	TM	OK	115602	475742	2.04102	4.40163	5e-05	0.000105404	yes
XLOC_010579	XLOC_010579	TcSYL_0156530	TcX10_chr31:337298-338010	DCT	TM	OK	150562	619194	2.04003	3.14987	5e-05	0.000105404	yes
XLOC_000679	XLOC_000679	TcSYL_0013430	TcX10_chr1:2496165-2497183	DCT	TM	OK	128991	530205	2.03928	3.74588	5e-05	0.000105404	yes
XLOC_001294	XLOC_001294	TcSYL_0010910	TcX10_chr1:2131118-2131962	DCT	TM	OK	21007	861277	2.03561	3.94874	5e-05	0.000105404	yes
XLOC_008529	XLOC_008529	TcSYL_0142880	TcX10_chr27:393789-394051	DCT	TM	OK	100578	412152	2.03486	2.6021	5e-05	0.000105404	yes
XLOC_017648	XLOC_017648	TcSYL_0050880	TcX10_chr6:234114-234949	DCT	TM	OK	383352	156386	2.02837	4.76938	5e-05	0.000105404	yes
XLOC_020426	XLOC_020426	TcSYL_0075470	TcX10_chr9:441811-442457	DCT	TM	OK	846887	342249	2.01481	5.3818	5e-05	0.000105404	yes
XLOC_016277	XLOC_016277	TcSYL_0197000	TcX10_chr43:175624-176291	DCT	TM	OK	26014	105092	2.01429	3.81724	5e-05	0.000105404	yes
XLOC_000581	XLOC_000581	TcSYL_0011690	TcX10_chr1:2378528-2379348	DCT	TM	OK	195939	786909	2.00579	3.77048	5e-05	0.000105404	yes
XLOC_004393	XLOC_004393	TcSYL_0110350	TcX10_chr16:435406-435725	DCT	TM	OK	979033	393043	2.00526	4.88435	5e-05	0.000105404	yes
XLOC_009532	XLOC_009532	TcSYL_0023160	TcX10_chr3:329516-330489	DCT	TM	OK	668538	267915	2.00269	5.86654	5e-05	0.000105404	yes
XLOC_003759	XLOC_003759	TcSYL_0102940	TcX10_chr14:844152-844921	DCT	TM	OK	194657	779679	2.00195	3.59503	5e-05	0.000105404	yes
XLOC_019977	XLOC_019977	TcSYL_0072640	TcX10_chr8:203898-205210	DCT	TM	OK	107038	428375	2.00075	3.6924	5e-05	0.000105404	yes
XLOC_009486	XLOC_009486	TcSYL_0022670	TcX10_chr3:150273-151000	DCT	TM	OK	105562	420139	1.99278	5.89594	5e-05	0.000105404	yes
XLOC_009489	XLOC_009489	TcSYL_0022700	TcX10_chr3:155464-156836	DCT	TM	OK	422891	168296	1.99264	5.72498	5e-05	0.000105404	yes
XLOC_017389	XLOC_017389	TcSYL_0046120	TcX10_chr5:430899-431242	DCT	TM	OK	703852	279186	1.98788	4.33897	5e-05	0.000105404	yes
XLOC_012947	XLOC_012947	TcSYL_0181900	TcX10_chr39:331621-332513	DCT	TM	OK	141887	560765	1.98265	3.53977	5e-05	0.000105404	yes
XLOC_004774	XLOC_004774	TcSYL_0113970	TcX10_chr18:493106-494136	DCT	TM	OK	29101	114898	1.98121	4.78287	5e-05	0.000105404	yes
XLOC_012572	XLOC_012572	TcSYL_0176980	TcX10_chr38:321617-322206	DCT	TM	OK	144266	568716	1.97898	2.66672	5e-05	0.000105404	yes
XLOC_018857	XLOC_018857	TcSYL_0064560	TcX10_chr7:1089529-1090727	DCT	TM	OK	319864	125.65	1.97388	5.11877	5e-05	0.000105404	yes
XLOC_011898	XLOC_011898	TcSYL_0169930	TcX10_chr36:210953-211563	DCT	TM	OK	512802	200922	1.97016	4.44154	5e-05	0.000105404	yes
XLOC_002343	XLOC_002343	TcSYL_0089140	TcX10_chr12:116523-117010	DCT	TM	OK	956846	370415	1.95278	4.67903	5e-05	0.000105404	yes
XLOC_005125	XLOC_005125	TcSYL_0116590	TcX10_chr19:695502-696163	DCT	TM	OK	196399	758185	1.94877	3.17774	5e-05	0.000105404	yes
XLOC_004265	XLOC_004265	TcSYL_0108090	TcX10_chr15:786584-788712	DCT	TM	OK	116853	448487	1.94037	4.52296	5e-05	0.000105404	yes
XLOC_005472	XLOC_005472	TcSYL_0019800	TcX10_chr2:941564-941907	DCT	TM	OK	153366	585652	1.93307	4.19378	5e-05	0.000105404	yes
XLOC_017416	XLOC_017416	TcSYL_0047570	TcX10_chr5:905327-905970	DCT	TM	OK	413251	156325	1.91946	4.16535	5e-05	0.000105404	yes
XLOC_000225	XLOC_000225	TcSYL_0004370	TcX10_chr1:1165157-1165695	DCT	TM	OK	502566	189947	1.91821	3.99875	5e-05	0.000105404	yes
XLOC_002868	XLOC_002868	TcSYL_0096250	TcX10_chr13:655331-655821	DCT	TM	OK	25555	963729	1.91502	3.26318	5e-05	0.000105404	yes
XLOC_001438	XLOC_001438	TcSYL_0013760	TcX10_chr1:2791888-2792864	DCT	TM	OK	116157	437397	1.91287	3.12873	5e-05	0.000105404	yes
XLOC_005031	XLOC_005031	TcSYL_0115090	TcX10_chr19:241045-241586	DCT	TM	OK	384849	144562	1.90932	4.01994	5e-05	0.000105404	yes
XLOC_005880	XLOC_005880	TcSYL_0019640	TcX10_chr2:878607-879193	DCT	TM	OK	677081	254325	1.90927	4.52124	5e-05	0.000105404	yes
XLOC_019979	XLOC_019979	TcSYL_0072670	TcX10_chr8:208761-210469	DCT	TM	OK	521972	195977	1.90864	2.97889	5e-05	0.000105404	yes
XLOC_013196	XLOC_013196	TcSYL_0181610	TcX10_chr39:317135-317835	DCT	TM	OK	174161	650784	1.90175	3.00641	5e-05	0.000105404	yes
XLOC_015979	XLOC_015979	TcSYL_0195910	TcX10_chr43:93474-94006	DCT	TM	OK	294594	109617	1.89567	3.13086	5e-05	0.000105404	yes
XLOC_004316	XLOC_004316	TcSYL_0108780	TcX10_chr15:886182-887413	DCT	TM	OK	299345	110967	1.89026	4.67942	5e-05	0.000105404	yes
XLOC_004989	XLOC_004989	TcSYL_0115920	TcX10_chr19:505641-506209	DCT	TM	OK	320722	118412	1.88442	3.46778	5e-05	0.000105404	yes
XLOC_020134	XLOC_020134	TcSYL_0077460	TcX10_chr9:680232-680695	DCT	TM	OK	465188	171449	1.88189	3.38161	5e-05	0.000105404	yes
XLOC_000175	XLOC_000175	TcSYL_0003730	TcX10_chr1:1060539-1061722	DCT	TM	OK	334342	122.61	1.87468	4.90254	5e-05	0.000105404	yes
XLOC_002038	XLOC_002038	TcSYL_0087800	TcX10_chr11:812614-813230	DCT	TM	OK	284661	103235	1.85861	3.35768	5e-05	0.000105404	yes
XLOC_001844	XLOC_001844	TcSYL_0085010	TcX10_chr11:367212-368230	DCT	TM	OK	266276	961127	1.85181	4.26161	5e-05	0.000105404	yes
XLOC_018707	XLOC_018707	TcSYL_0062180	TcX10_chr7:195208-196463	DCT	TM	OK	210205	758429	1.85122	4.32845	5e-05	0.000105404	yes
XLOC_020284	XLOC_020284	TcSYL_0079370	TcX10_chr9:1032066-1033030	DCT	TM	OK	732857	264198	1.85002	5.45207	5e-05	0.000105404	yes
XLOC_016261	XLOC_016261	TcSYL_0196790	TcX10_chr43:158540-159495	DCT	TM	OK	17377	625905	1.84876	3.49949	5e-05	0.000105404	yes
XLOC_002124	XLOC_002124	TcSYL_0088880	TcX10_chr11:1036253-1036890	DCT	TM	OK	543501	195.75	1.84866	4.27746	5e-05	0.000105404	yes
XLOC_005169	XLOC_005169	TcSYL_0117160	TcX10_chr19:739158-740521	DCT	TM	OK	22.41	804629	1.84418	4.4981	5e-05	0.000105404	yes
XLOC_017186	XLOC_017186	TcSYL_0046860	TcX10_chr5:626982-627457	DCT	TM	OK	46372	166364	1.84301	3.88346	5e-05	0.000105404	yes
XLOC_007459	XLOC_007459	TcSYL_0132100	TcX10_chr23:584632-585347	DCT	TM	OK	210995	753656	1.83669	3.44985	5e-05	0.000105404	yes
XLOC_007484	XLOC_007484	TcSYL_0132400	TcX10_chr23:603556-604478	DCT	TM	OK	882275	315062	1.83633	5.65631	5e-05	0.000105404	yes
XLOC_009306	XLOC_009306	TcSYL_0026830	TcX10_chr3:1061837-1062915	DCT	TM	OK	301726	107606	1.83445	4.47577	5e-05	0.000105404	yes
XLOC_020425	XLOC_020425	TcSYL_0075460	TcX10_chr9:439055-440361	DCT	TM	OK	551402	196041	1.82998	5.50776	5e-05	0.000105404	yes
XLOC_002851	XLOC_002851	TcSYL_0095790	TcX10_chr13:542036-542625	DCT	TM	OK	621447	220.34	1.82603	4.31783	5e-05	0.000105404	yes
XLOC_020286	XLOC_020286	TcSYL_0079390	TcX10_chr9:1034170-1034909	DCT	TM	OK	136959	485294	1.82511	5.75035	5e-05	0.000105404	yes
XLOC_008200	XLOC_008200	TcSYL_0140780	TcX10_chr26:513851-514338	DCT	TM	OK	504679	178.72	1.82426	3.52222	5e-05	0.000105404	yes
XLOC_004545	XLOC_004545	TcSYL_0112580	TcX10_chr16:1457202-1457611	DCT	TM	OK	121752	430319	1.82146	4.22202	5e-05	0.000105404	yes
XLOC_011723	XLOC_011723	TcSYL_0167060	TcX10_chr35:286028-286755	DCT	TM	OK	977177	342802	1.81068	5.2735	5e-05	0.000105404	yes
XLOC_018960	XLOC_018960	TcSYL_0066570	TcX10_chr7:1421115-1423375	DCT	TM	OK	308374	108178	1.81065	2.55828	5e-05	0.000105404	yes
XLOC_003237	XLOC_003237	TcSYL_0097150	TcX10_chr13:722643-723403	DCT	TM	OK	262466	919607	1.80889	3.5308	5e-05	0.000105404	yes
XLOC_016278	XLOC_016278	TcSYL_0197010	TcX10_chr43:176508-177016	DCT	TM	OK	455048	159371	1.80829	3.51441	5e-05	0.000105404	yes
XLOC_002399	XLOC_002399	TcSYL_0089840	TcX10_chr12:303100-303854	DCT	TM	OK	267168	935417	1.80786	3.54125	5e-05	0.000105404	yes
XLOC_009493	XLOC_009493	TcSYL_0022740	TcX10_chr3:170304-171055	DCT	TM	OK	405735	141849	1.80574	4.1642	5e-05	0.000105404	yes
XLOC_005064	XLOC_005064	TcSYL_0115870	TcX10_chr19:494522-495078	DCT	TM	OK	22839	797527	1.80403	3.10993	5e-05	0.000105404	yes
XLOC_016819	XLOC_016819	TcSYL_0204110	TcX10_chr46:359126-359478	DCT	TM	OK	59922	208.86	1.80138	2.7582	5e-05	0.000105404	yes
XLOC_017500	XLOC_017500	TcSYL_0048500	TcX10_chr5:1113367-1114442	DCT	TM	OK	359306	124334	1.79094	4.55289	5e-05	0.000105404	yes
XLOC_004664	XLOC_004664	TcSYL_0110900	TcX10_chr16:890415-891538	DCT	TM	OK	423575	146395	1.78918	4.87912	5e-05	0.000105404	yes
XLOC_004486	XLOC_004486	TcSYL_0111980	TcX10_chr16:1250402-1251651	DCT	TM	OK	213.3	736274	1.78736	6.3922	5e-05	0.000105404	yes
XLOC_016287	XLOC_016287	TcSYL_0197130	TcX10_chr43:186867-187660	DCT	TM	OK	132859	458168	1.78598	2.74071	5e-05	0.000105404	yes
XLOC_004166	XLOC_004166	TcSYL_0106950	TcX10_chr15:494881-495296	DCT	TM	OK	595516	205185	1.78472	3.32272	5e-05	0.000105404	yes
XLOC_005153	XLOC_005153	TcSYL_0116940	TcX10_chr19:724470-724822	DCT	TM	OK	526737	181456	1.78447	3.48732	5e-05	0.000105404	yes
XLOC_000659	XLOC_000659	TcSYL_0013170	TcX10_chr1:2481677-2482323	DCT	TM	OK	385897	132644	1.78128	3.95215	5e-05	0.000105404	yes
XLOC_006528	XLOC_006528	TcSYL_0122210	TcX10_chr21:296128-296540	DCT	TM	OK	448776	153803	1.77701	2.91879	5e-05	0.000105404	yes
XLOC_018875	XLOC_018875	TcSYL_0064830	TcX10_chr7:1111094-1111500	DCT	TM	OK	545893	185331	1.76342	3.02529	5e-05	0.000105404	yes
XLOC_020103	XLOC_020103	TcSYL_0077030	TcX10_chr9:653206-653624	DCT	TM	OK	620588	210668	1.76327	3.26899	5e-05	0.000105404	yes
XLOC_018853	XLOC_018853	TcSYL_0064490	TcX10_chr7:1076526-1077343	DCT	TM	OK	131776	445388	1.75697	2.76469	5e-05	0.000105404	yes
XLOC_000064	XLOC_000064	TcSYL_0001340	TcX10_chr1:517981-518666	DCT	TM	OK	834073	280582	1.75018	4.77924	5e-05	0.000105404	yes
XLOC_013840	XLOC_013840	TcSYL_0038670	TcX10_chr4:743067-747970	DCT	TM	OK	216369	72662	1.74771	2.93326	5e-05	0.000105404	yes
XLOC_009520	XLOC_009520	TcSYL_0023040	TcX10_chr3:263059-263768	DCT	TM	OK	390721	130877	1.74399	3.79218	5e-05	0.000105404	yes
XLOC_017175	XLOC_017175	TcSYL_0046750	TcX10_chr5:614254-614966	DCT	TM	OK	392986	131323	1.74057	3.84066	5e-05	0.000105404	yes
XLOC_004059	XLOC_004059	TcSYL_0105390	TcX10_chr15:240839-241380	DCT	TM	OK	940769	313812	1.73799	4.45073	5e-05	0.000105404	yes
XLOC_020574	XLOC_020574	TcSYL_0079120	TcX10_chr9:963201-963934	DCT	TM	OK	462906	154184	1.73586	4.10472	5e-05	0.000105404	yes
XLOC_020506	XLOC_020506	TcSYL_0076460	TcX10_chr9:602324-603144	DCT	TM	OK	58257	193556	1.73225	4.55575	5e-05	0.000105404	yes
XLOC_004705	XLOC_004705	TcSYL_0112690	TcX10_chr18:35447-36204	DCT	TM	OK	916586	303332	1.72655	5.0056	5e-05	0.000105404	yes
XLOC_015764	XLOC_015764	TcSYL_0191670	TcX10_chr42:422042-422793	DCT	TM	OK	172689	567724	1.71701	3.01257	5e-05	0.000105404	yes
XLOC_000443	XLOC_000443	TcSYL_0009100	TcX10_chr1:1907859-1908241	DCT	TM	OK	539387	1772.23	1.71617	5.67641	5e-05	0.000105404	yes
XLOC_004135	XLOC_004135	TcSYL_0106540	TcX10_chr15:348745-349154	DCT	TM	OK	434445	142521	1.71393	2.7188	5e-05	0.000105404	yes
XLOC_005084	XLOC_005084	TcSYL_0116130	TcX10_chr19:589244-589695	DCT	TM	OK	643024	210263	1.70925	3.37521	5e-05	0.000105404	yes
XLOC_006501	XLOC_006501	TcSYL_0121840	TcX10_chr21:236934-237823	DCT	TM	OK	169529	55367	1.70749	3.22593	5e-05	0.000105404	yes
XLOC_008405	XLOC_008405	TcSYL_0141830	TcX10_chr27:97549-98006	DCT	TM	OK	617145	201398	1.70637	3.93436	5e-05	0.000105404	yes
XLOC_003304	XLOC_003304	TcSYL_0098010	TcX10_chr13:779626-780011	DCT	TM	OK	153403	500.46	1.70593	4.153	5e-05	0.000105404	yes
XLOC_011738	XLOC_011738	TcSYL_0167210	TcX10_chr35:336036-336694	DCT	TM	OK	393659	127789	1.69874	3.56287	5e-05	0.000105404	yes
XLOC_006542	XLOC_006542	TcSYL_0122350	TcX10_chr21:350538-350992	DCT	TM	OK	127424	409215	1.68323	4.28223	5e-05	0.000105404	yes
XLOC_005885	XLOC_005885	TcSYL_0019690	TcX10_chr2:900724-901832	DCT	TM	OK	233538	74928	1.68185	3.73139	5e-05	0.000105404	yes
XLOC_017426	XLOC_017426	TcSYL_0047670	TcX10_chr5:929331-930508	DCT	TM	OK	281403	899814	1.67699	4.05861	5e-05	0.000105404	yes
XLOC_009011	XLOC_009011	TcSYL_0147320	TcX10_chr29:247869-248653	DCT	TM	OK	561355	178881	1.67202	4.16734	5e-05	0.000105404	yes
XLOC_009672	XLOC_009672	TcSYL_0027230	TcX10_chr3:1170879-1171222	DCT	TM	OK	2428.23	7710.79	1.66697	5.89631	5e-05	0.000105404	yes
XLOC_011861	XLOC_011861	TcSYL_0169260	TcX10_chr36:163600-164360	DCT	TM	OK	570808	181092	1.66565	4.23713	5e-05	0.000105404	yes
XLOC_002071	XLOC_002071	TcSYL_0088200	TcX10_chr11:886154-887361	DCT	TM	OK	206456	654955	1.66556	3.68581	5e-05	0.000105404	yes
XLOC_020428	XLOC_020428	TcSYL_0075490	TcX10_chr9:451974-453892	DCT	TM	OK	367128	116259	1.66299	5.05927	5e-05	0.000105404	yes
XLOC_020369	XLOC_020369	TcSYL_0074900	TcX10_chr9:197017-197690	DCT	TM	OK	996303	315369	1.66238	4.68399	5e-05	0.000105404	yes
XLOC_004960	XLOC_004960	TcSYL_0115570	TcX10_chr19:423294-423955	DCT	TM	OK	37812	119.47	1.65973	3.46957	5e-05	0.000105404	yes
XLOC_012785	XLOC_012785	TcSYL_0178640	TcX10_chr39:16675-17183	DCT	TM	OK	32375	102172	1.65806	2.6975	5e-05	0.000105404	yes
XLOC_003232	XLOC_003232	TcSYL_0097100	TcX10_chr13:719128-719834	DCT	TM	OK	947966	298561	1.65512	4.61385	5e-05	0.000105404	yes
XLOC_009233	XLOC_009233	TcSYL_0025830	TcX10_chr3:993231-993976	DCT	TM	OK	551058	173254	1.65261	4.18841	5e-05	0.000105404	yes
XLOC_002087	XLOC_002087	TcSYL_0088430	TcX10_chr11:899644-900236	DCT	TM	OK	346273	108813	1.65187	3.14692	5e-05	0.000105404	yes
XLOC_020256	XLOC_020256	TcSYL_0079050	TcX10_chr9:959706-960412	DCT	TM	OK	988409	309631	1.64737	4.58767	5e-05	0.000105404	yes
XLOC_009068	XLOC_009068	TcSYL_0023260	TcX10_chr3:380695-383489	DCT	TM	OK	338943	106119	1.64657	5.34048	5e-05	0.000105404	yes
XLOC_007206	XLOC_007206	TcSYL_0132450	TcX10_chr23:606860-607197	DCT	TM	OK	994083	310707	1.64412	2.91829	5e-05	0.000105404	yes
XLOC_009494	XLOC_009494	TcSYL_0022750	TcX10_chr3:173680-174278	DCT	TM	OK	720934	224539	1.63903	3.96657	5e-05	0.000105404	yes
XLOC_002277	XLOC_002277	TcSYL_0086800	TcX10_chr11:661755-664603	DCT	TM	OK	379008	117942	1.63778	2.74501	5e-05	0.000105404	yes
XLOC_014582	XLOC_014582	TcSYL_0041250	TcX10_chr4:1077192-1077643	DCT	TM	OK	443852	1379.96	1.63648	5.44278	5e-05	0.000105404	yes
XLOC_004718	XLOC_004718	TcSYL_0112820	TcX10_chr18:102545-103929	DCT	TM	OK	211321	65648	1.63531	3.85834	5e-05	0.000105404	yes
XLOC_020521	XLOC_020521	TcSYL_0077020	TcX10_chr9:652722-653098	DCT	TM	OK	112804	350349	1.63497	3.4748	5e-05	0.000105404	yes
XLOC_020064	XLOC_020064	TcSYL_0076500	TcX10_chr9:605583-606454	DCT	TM	OK	466219	144.75	1.63448	3.99883	5e-05	0.000105404	yes
XLOC_009499	XLOC_009499	TcSYL_0022800	TcX10_chr3:184173-185050	DCT	TM	OK	657656	203721	1.63119	4.55649	5e-05	0.000105404	yes
XLOC_003147	XLOC_003147	TcSYL_0095890	TcX10_chr13:609956-610737	DCT	TM	OK	580203	179193	1.62688	4.20341	5e-05	0.000105404	yes
XLOC_020291	XLOC_020291	TcSYL_0079440	TcX10_chr9:1047696-1048060	DCT	TM	OK	223279	686985	1.62143	4.3015	5e-05	0.000105404	yes
XLOC_000019	XLOC_000019	TcSYL_0000430	TcX10_chr1:106887-107689	DCT	TM	OK	480872	147912	1.62102	4.02712	5e-05	0.000105404	yes
XLOC_008994	XLOC_008994	TcSYL_0147120	TcX10_chr29:108855-109234	DCT	TM	OK	572343	176.02	1.62079	2.54278	5e-05	0.000105404	yes
XLOC_002973	XLOC_002973	TcSYL_0099760	TcX10_chr13:897352-898262	DCT	TM	OK	163746	502904	1.61883	2.8951	5e-05	0.000105404	yes
XLOC_013938	XLOC_013938	TcSYL_0040960	TcX10_chr4:1038303-1038586	DCT	TM	OK	207137	634.55	1.61515	3.08443	5e-05	0.000105404	yes
XLOC_020383	XLOC_020383	TcSYL_0075040	TcX10_chr9:252547-253709	DCT	TM	OK	176328	539905	1.61445	5.71585	5e-05	0.000105404	yes
XLOC_016774	XLOC_016774	TcSYL_0203380	TcX10_chr46:282321-283015	DCT	TM	OK	120844	367456	1.60442	4.79358	5e-05	0.000105404	yes
XLOC_008981	XLOC_008981	TcSYL_0146980	TcX10_chr29:96414-97273	DCT	TM	OK	103552	314059	1.60068	4.88959	5e-05	0.000105404	yes
XLOC_009515	XLOC_009515	TcSYL_0022980,TcSYL_0022990	TcX10_chr3:237697-239087	DCT	TM	OK	822991	248701	1.59546	4.9407	5e-05	0.000105404	yes
XLOC_002006	XLOC_002006	TcSYL_0087240	TcX10_chr11:775430-775941	DCT	TM	OK	111758	337598	1.59492	4.12161	5e-05	0.000105404	yes
XLOC_000054	XLOC_000054	TcSYL_0001240	TcX10_chr1:478371-479308	DCT	TM	OK	305814	923799	1.59492	3.51309	5e-05	0.000105404	yes
XLOC_004861	XLOC_004861	TcSYL_0112940	TcX10_chr18:293235-294313	DCT	TM	OK	168472	504439	1.58217	3.06477	5e-05	0.000105404	yes
XLOC_004433	XLOC_004433	TcSYL_0111330	TcX10_chr16:1074797-1075194	DCT	TM	OK	454573	135841	1.57934	2.98729	5e-05	0.000105404	yes
XLOC_005113	XLOC_005113	TcSYL_0116420	TcX10_chr19:684564-684994	DCT	TM	OK	705873	210731	1.57792	3.11693	5e-05	0.000105404	yes
XLOC_014745	XLOC_014745	TcSYL_0043530	TcX10_chr4:1323905-1324230	DCT	TM	OK	970078	289.1	1.57539	2.75573	5e-05	0.000105404	yes
XLOC_014705	XLOC_014705	TcSYL_0043050	TcX10_chr4:1284888-1285831	DCT	TM	OK	437254	130065	1.57269	4.0404	5e-05	0.000105404	yes
XLOC_020131	XLOC_020131	TcSYL_0077420	TcX10_chr9:678451-678875	DCT	TM	OK	220113	654672	1.57253	4.38422	5e-05	0.000105404	yes
XLOC_002367	XLOC_002367	TcSYL_0089380	TcX10_chr12:238017-238774	DCT	TM	OK	578991	172123	1.57183	3.99042	5e-05	0.000105404	yes
XLOC_003155	XLOC_003155	TcSYL_0095970	TcX10_chr13:629357-630414	DCT	TM	OK	317288	940726	1.56798	3.78278	5e-05	0.000105404	yes
XLOC_015431	XLOC_015431	TcSYL_0189450	TcX10_chr41:326785-327152	DCT	TM	OK	955911	283044	1.56608	3.0602	5e-05	0.000105404	yes
XLOC_006413	XLOC_006413	TcSYL_0123230	TcX10_chr21:538951-539537	DCT	TM	OK	485475	143739	1.56598	3.60369	5e-05	0.000105404	yes
XLOC_007423	XLOC_007423	TcSYL_0131660	TcX10_chr23:557382-558901	DCT	TM	OK	334651	990696	1.56578	4.3627	5e-05	0.000105404	yes
XLOC_002984	XLOC_002984	TcSYL_0092560	TcX10_chr13:37501-38531	DCT	TM	OK	15.38	45.51	1.56513	2.91833	5e-05	0.000105404	yes
XLOC_004213	XLOC_004213	TcSYL_0107440	TcX10_chr15:627080-627657	DCT	TM	OK	496706	146674	1.56215	3.32539	5e-05	0.000105404	yes
XLOC_000048	XLOC_000048	TcSYL_0001180	TcX10_chr1:458104-458759	DCT	TM	OK	149175	440467	1.56203	4.80386	5e-05	0.000105404	yes
XLOC_018440	XLOC_018440	TcSYL_0056950	TcX10_chr6:869643-870058	DCT	TM	OK	844266	249.26	1.56188	3.19914	5e-05	0.000105404	yes
XLOC_017124	XLOC_017124	TcSYL_0046160	TcX10_chr5:436503-437722	DCT	TM	OK	365075	107766	1.56164	4.13336	5e-05	0.000105404	yes
XLOC_013224	XLOC_013224	TcSYL_0182400	TcX10_chr39:362418-362974	DCT	TM	OK	883088	259479	1.55499	3.86836	5e-05	0.000105404	yes
XLOC_000565	XLOC_000565	TcSYL_0011530	TcX10_chr1:2327119-2327876	DCT	TM	OK	293881	863138	1.55436	3.31182	5e-05	0.000105404	yes
XLOC_009097	XLOC_009097	TcSYL_0023600	TcX10_chr3:622658-623529	DCT	TM	OK	194333	570381	1.55339	2.81301	5e-05	0.000105404	yes
XLOC_004078	XLOC_004078	TcSYL_0105650	TcX10_chr15:258394-259655	DCT	TM	OK	489479	143614	1.55287	4.39324	5e-05	0.000105404	yes
XLOC_017347	XLOC_017347	TcSYL_0045200	TcX10_chr5:172959-173767	DCT	TM	OK	383734	112.51	1.55188	3.54549	5e-05	0.000105404	yes
XLOC_001870	XLOC_001870	TcSYL_0085400	TcX10_chr11:391206-392032	DCT	TM	OK	630213	184721	1.55144	4.20068	5e-05	0.000105404	yes
XLOC_007373	XLOC_007373	TcSYL_0131030	TcX10_chr23:513159-514000	DCT	TM	OK	214929	629849	1.55115	2.93006	5e-05	0.000105404	yes
XLOC_009248	XLOC_009248	TcSYL_0026020	TcX10_chr3:1007543-1008261	DCT	TM	OK	449855	131792	1.55073	3.52659	5e-05	0.000105404	yes
XLOC_000494	XLOC_000494	TcSYL_0009880	TcX10_chr1:1962390-1963660	DCT	TM	OK	207492	607041	1.54874	3.47213	5e-05	0.000105404	yes
XLOC_018891	XLOC_018891	TcSYL_0064990	TcX10_chr7:1152328-1154510	DCT	TM	OK	299601	876386	1.54852	4.64427	5e-05	0.000105404	yes
XLOC_004779	XLOC_004779	TcSYL_0114020	TcX10_chr18:505403-505875	DCT	TM	OK	127632	373307	1.54837	3.92672	5e-05	0.000105404	yes
XLOC_002681	XLOC_002681	TcSYL_0092080	TcX10_chr12:925369-926360	DCT	TM	OK	205593	601314	1.54833	3.08582	5e-05	0.000105404	yes
XLOC_020229	XLOC_020229	TcSYL_0078770	TcX10_chr9:816616-817466	DCT	TM	OK	929655	270813	1.54253	4.54703	5e-05	0.000105404	yes
XLOC_009059	XLOC_009059	TcSYL_0023170	TcX10_chr3:347517-348919	DCT	TM	OK	310947	903781	1.53931	3.98762	5e-05	0.000105404	yes
XLOC_015665	XLOC_015665	TcSYL_0194330	TcX10_chr42:750267-751006	DCT	TM	OK	736311	213407	1.53522	4.14909	5e-05	0.000105404	yes
XLOC_000360	XLOC_000360	TcSYL_0006090	TcX10_chr1:1430015-1430628	DCT	TM	OK	192456	553165	1.52318	2.53195	5e-05	0.000105404	yes
XLOC_001320	XLOC_001320	TcSYL_0011180	TcX10_chr1:2211807-2212276	DCT	TM	OK	265429	762891	1.52315	4.64494	5e-05	0.000105404	yes
XLOC_019871	XLOC_019871	TcSYL_0073570	TcX10_chr8:805463-805947	DCT	TM	OK	469316	134.74	1.52155	2.80019	5e-05	0.000105404	yes
XLOC_008134	XLOC_008134	TcSYL_0139160	TcX10_chr26:35535-36478	DCT	TM	OK	117142	335754	1.51914	4.876	5e-05	0.000105404	yes
XLOC_014737	XLOC_014737	TcSYL_0043430	TcX10_chr4:1318301-1318731	DCT	TM	OK	45577	130106	1.51331	2.50113	5e-05	0.000105404	yes
XLOC_005994	XLOC_005994	TcSYL_0117720	TcX10_chr20:65693-66207	DCT	TM	OK	35543	101021	1.50701	2.59483	5e-05	0.000105404	yes
XLOC_005128	XLOC_005128	TcSYL_0116620	TcX10_chr19:697762-698834	DCT	TM	OK	285969	812696	1.50686	3.45337	5e-05	0.000105404	yes
XLOC_008651	XLOC_008651	TcSYL_0145950	TcX10_chr28:363224-363813	DCT	TM	OK	226219	642576	1.50615	2.33169	5e-05	0.000105404	yes
XLOC_004673	XLOC_004673	TcSYL_0110990	TcX10_chr16:924851-926136	DCT	TM	OK	479926	135885	1.50151	4.3826	5e-05	0.000105404	yes
XLOC_008992	XLOC_008992	TcSYL_0147100	TcX10_chr29:106733-108429	DCT	TM	OK	41425	117172	1.50005	4.53338	5e-05	0.000105404	yes
XLOC_000049	XLOC_000049	TcSYL_0001190	TcX10_chr1:465341-466455	DCT	TM	OK	504418	142.5	1.49827	4.16636	5e-05	0.000105404	yes
XLOC_004666	XLOC_004666	TcSYL_0110920	TcX10_chr16:905892-906571	DCT	TM	OK	772637	218164	1.49755	4.13912	5e-05	0.000105404	yes
XLOC_010596	XLOC_010596	TcSYL_0156700	TcX10_chr31:403421-404565	DCT	TM	OK	405696	114381	1.49537	3.9487	5e-05	0.000105404	yes
XLOC_007405	XLOC_007405	TcSYL_0131450	TcX10_chr23:541179-541789	DCT	TM	OK	437773	123177	1.49248	3.00062	5e-05	0.000105404	yes
XLOC_018822	XLOC_018822	TcSYL_0064170	TcX10_chr7:963316-964700	DCT	TM	OK	358329	100617	1.48951	4.09288	5e-05	0.000105404	yes
XLOC_009313	XLOC_009313	TcSYL_0026910	TcX10_chr3:1066884-1067503	DCT	TM	OK	392588	110221	1.48931	2.98489	5e-05	0.000105404	yes
XLOC_000192	XLOC_000192	TcSYL_0004040	TcX10_chr1:1086791-1088718	DCT	TM	OK	186171	522655	1.48923	3.79875	5e-05	0.000105404	yes
XLOC_013068	XLOC_013068	TcSYL_0179000	TcX10_chr39:40830-41899	DCT	TM	OK	393645	110464	1.48861	3.85828	5e-05	0.000105404	yes
XLOC_009253	XLOC_009253	TcSYL_0026090	TcX10_chr3:1011591-1013575	DCT	TM	OK	31174	873117	1.48583	4.3741	5e-05	0.000105404	yes
XLOC_011841	XLOC_011841	TcSYL_0169060	TcX10_chr36:128044-129557	DCT	TM	OK	141756	39491	1.47811	3.1205	5e-05	0.000105404	yes
XLOC_003728	XLOC_003728	TcSYL_0102520	TcX10_chr14:818409-818815	DCT	TM	OK	557984	155364	1.47736	2.47619	5e-05	0.000105404	yes
XLOC_018830	XLOC_018830	TcSYL_0064250	TcX10_chr7:985183-985697	DCT	TM	OK	267858	745188	1.47613	4.72726	5e-05	0.000105404	yes
XLOC_013076	XLOC_013076	TcSYL_0179130	TcX10_chr39:59699-60525	DCT	TM	OK	376722	104488	1.47177	3.35329	5e-05	0.000105404	yes
XLOC_009017	XLOC_009017	TcSYL_0147380	TcX10_chr29:268251-268654	DCT	TM	OK	184152	509563	1.46836	3.86914	5e-05	0.000105404	yes
XLOC_013035	XLOC_013035	TcSYL_0178540	TcX10_chr39:8357-9603	DCT	TM	OK	149935	41473	1.46783	2.88688	5e-05	0.000105404	yes
XLOC_014756	XLOC_014756	TcSYL_0043680	TcX10_chr4:1335103-1335464	DCT	TM	OK	118897	328372	1.46562	3.05086	5e-05	0.000105404	yes
XLOC_000055	XLOC_000055	TcSYL_0001250	TcX10_chr1:486746-487851	DCT	TM	OK	246182	679184	1.46408	3.27842	5e-05	0.000105404	yes
XLOC_006438	XLOC_006438	TcSYL_0123510	TcX10_chr21:585665-586578	DCT	TM	OK	693087	190795	1.46092	4.12977	5e-05	0.000105404	yes
XLOC_008337	XLOC_008337	TcSYL_0140300	TcX10_chr26:404595-405064	DCT	TM	OK	378207	1039.85	1.45912	4.78194	5e-05	0.000105404	yes
XLOC_006211	XLOC_006211	TcSYL_0121260	TcX10_chr20:571073-571947	DCT	TM	OK	686007	188566	1.45877	4.12344	5e-05	0.000105404	yes
XLOC_000304	XLOC_000304	TcSYL_0005300	TcX10_chr1:1362654-1363537	DCT	TM	OK	472369	129518	1.45517	3.68545	5e-05	0.000105404	yes
XLOC_020377	XLOC_020377	TcSYL_0074980	TcX10_chr9:232689-233104	DCT	TM	OK	155.21	425337	1.45439	3.69521	5e-05	0.000105404	yes
XLOC_004216	XLOC_004216	TcSYL_0107470	TcX10_chr15:629433-630331	DCT	TM	OK	354524	97124	1.45394	3.32833	5e-05	0.000105404	yes
XLOC_015952	XLOC_015952	TcSYL_0195550	TcX10_chr43:69207-70042	DCT	TM	OK	419116	114677	1.45216	3.47118	5e-05	0.000105404	yes
XLOC_015674	XLOC_015674	TcSYL_0194420	TcX10_chr42:789299-790155	DCT	TM	OK	606269	165517	1.44895	3.89233	5e-05	0.000105404	yes
XLOC_015967	XLOC_015967	TcSYL_0195770	TcX10_chr43:83147-84489	DCT	TM	OK	166596	454583	1.44819	5.14074	5e-05	0.000105404	yes
XLOC_020357	XLOC_020357	TcSYL_0074770	TcX10_chr9:152429-153354	DCT	TM	OK	349.18	951849	1.44676	5.21711	5e-05	0.000105404	yes
XLOC_009488	XLOC_009488	TcSYL_0022690	TcX10_chr3:152969-153540	DCT	TM	OK	914827	249198	1.44572	3.71033	5e-05	0.000105404	yes
XLOC_004189	XLOC_004189	TcSYL_0107180	TcX10_chr15:592111-593585	DCT	TM	OK	916542	249271	1.44344	4.89335	5e-05	0.000105404	yes
XLOC_013070	XLOC_013070	TcSYL_0179030	TcX10_chr39:44881-45833	DCT	TM	OK	169201	458977	1.43969	2.65512	5e-05	0.000105404	yes
XLOC_005157	XLOC_005157	TcSYL_0117010	TcX10_chr19:728154-729052	DCT	TM	OK	904134	245224	1.43949	4.37619	5e-05	0.000105404	yes
XLOC_000214	XLOC_000214	TcSYL_0004260	TcX10_chr1:1144852-1145360	DCT	TM	OK	160645	435308	1.43816	4.09574	5e-05	0.000105404	yes
XLOC_003254	XLOC_003254	TcSYL_0097340	TcX10_chr13:737597-738159	DCT	TM	OK	428443	115765	1.43402	2.78594	5e-05	0.000105404	yes
XLOC_004533	XLOC_004533	TcSYL_0112450	TcX10_chr16:1419706-1420496	DCT	TM	OK	639639	171799	1.42539	3.81498	5e-05	0.000105404	yes
XLOC_019889	XLOC_019889	TcSYL_0073750	TcX10_chr8:852297-852922	DCT	TM	OK	450957	121041	1.42444	2.98932	5e-05	0.000105404	yes
XLOC_003754	XLOC_003754	TcSYL_0102870	TcX10_chr14:840044-840549	DCT	TM	OK	512405	137405	1.42308	2.79534	5e-05	0.000105404	yes
XLOC_006232	XLOC_006232	TcSYL_0118350	TcX10_chr20:308070-308842	DCT	TM	OK	287707	771219	1.42254	2.93606	5e-05	0.000105404	yes
XLOC_010860	XLOC_010860	TcSYL_0158230	TcX10_chr32:490676-491793	DCT	TM	OK	703575	188513	1.42189	4.27475	5e-05	0.000105404	yes
XLOC_017140	XLOC_017140	TcSYL_0046320	TcX10_chr5:496999-497561	DCT	TM	OK	767837	205671	1.42147	3.69229	5e-05	0.000105404	yes
XLOC_017479	XLOC_017479	TcSYL_0048200	TcX10_chr5:1092903-1093423	DCT	TM	OK	766793	205257	1.42052	3.27829	5e-05	0.000105404	yes
XLOC_003278	XLOC_003278	TcSYL_0097680	TcX10_chr13:757648-758165	DCT	TM	OK	533927	142601	1.41727	2.81065	5e-05	0.000105404	yes
XLOC_003724	XLOC_003724	TcSYL_0102400	TcX10_chr14:811130-812388	DCT	TM	OK	850634	227125	1.41688	4.59047	5e-05	0.000105404	yes
XLOC_010870	XLOC_010870	TcSYL_0158400	TcX10_chr32:502148-502782	DCT	TM	OK	499878	133113	1.41301	3.35088	5e-05	0.000105404	yes
XLOC_018816	XLOC_018816	TcSYL_0064110	TcX10_chr7:950149-952484	DCT	TM	OK	358599	954796	1.41282	4.446	5e-05	0.000105404	yes
XLOC_009089	XLOC_009089	TcSYL_0023480	TcX10_chr3:579935-581463	DCT	TM	OK	480433	127833	1.41185	4.27919	5e-05	0.000105404	yes
XLOC_003965	XLOC_003965	TcSYL_0104080	TcX10_chr15:114986-115977	DCT	TM	OK	628498	166968	1.40959	4.04286	5e-05	0.000105404	yes
XLOC_014072	XLOC_014072	TcSYL_0044660	TcX10_chr4:1488678-1489666	DCT	TM	OK	152427	404054	1.40643	2.43972	5e-05	0.000105404	yes
XLOC_020437	XLOC_020437	TcSYL_0075580	TcX10_chr9:486980-487464	DCT	TM	OK	712291	188129	1.40118	3.12406	5e-05	0.000105404	yes
XLOC_019848	XLOC_019848	TcSYL_0073330	TcX10_chr8:304506-305254	DCT	TM	OK	59411	156388	1.39633	3.52919	5e-05	0.000105404	yes
XLOC_009361	XLOC_009361	TcSYL_0027710	TcX10_chr3:1399867-1401140	DCT	TM	OK	964479	253.83	1.39604	4.63912	5e-05	0.000105404	yes
XLOC_000680	XLOC_000680	TcSYL_0013440	TcX10_chr1:2502163-2502827	DCT	TM	OK	592475	155916	1.39594	3.32964	5e-05	0.000105404	yes
XLOC_010862	XLOC_010862	TcSYL_0158250	TcX10_chr32:492279-492712	DCT	TM	OK	444928	116854	1.39306	2.28135	5e-05	0.000105404	yes
XLOC_009630	XLOC_009630	TcSYL_0026130	TcX10_chr3:1014997-1015547	DCT	TM	OK	367447	963818	1.39123	4.74088	5e-05	0.000105404	yes
XLOC_010848	XLOC_010848	TcSYL_0157980	TcX10_chr32:477806-478590	DCT	TM	OK	297646	779953	1.38979	2.83189	5e-05	0.000105404	yes
XLOC_005123	XLOC_005123	TcSYL_0116570	TcX10_chr19:693353-694704	DCT	TM	OK	54463	141.9	1.38153	4.12534	5e-05	0.000105404	yes
XLOC_009257	XLOC_009257	TcSYL_0026160	TcX10_chr3:1017111-1017985	DCT	TM	OK	793004	206316	1.37946	3.99778	5e-05	0.000105404	yes
XLOC_004178	XLOC_004178	TcSYL_0107070	TcX10_chr15:547805-548421	DCT	TM	OK	135054	350899	1.37752	4.02881	5e-05	0.000105404	yes
XLOC_008901	XLOC_008901	TcSYL_0147760	TcX10_chr29:341131-342008	DCT	TM	OK	223366	580285	1.37735	2.69521	5e-05	0.000105404	yes
XLOC_003990	XLOC_003990	TcSYL_0104500	TcX10_chr15:145325-146136	DCT	TM	OK	246804	640111	1.37496	2.71222	5e-05	0.000105404	yes
XLOC_014874	XLOC_014874	TcSYL_0184900	TcX10_chr40:223760-224724	DCT	TM	OK	285529	738635	1.37122	4.91398	5e-05	0.000105404	yes
XLOC_003265	XLOC_003265	TcSYL_0097480	TcX10_chr13:745247-746448	DCT	TM	OK	248372	640088	1.36577	3.2304	5e-05	0.000105404	yes
XLOC_008349	XLOC_008349	TcSYL_0140420	TcX10_chr26:419014-419624	DCT	TM	OK	450866	1160.27	1.36369	4.82429	5e-05	0.000105404	yes
XLOC_005207	XLOC_005207	TcSYL_0014840	TcX10_chr2:113100-113935	DCT	TM	OK	493536	1269.67	1.36322	4.93071	5e-05	0.000105404	yes
XLOC_001437	XLOC_001437	TcSYL_0013750	TcX10_chr1:2779194-2780455	DCT	TM	OK	359344	922149	1.35964	3.59036	5e-05	0.000105404	yes
XLOC_018819	XLOC_018819	TcSYL_0064140	TcX10_chr7:957419-957828	DCT	TM	OK	166572	425672	1.35359	3.42306	5e-05	0.000105404	yes
XLOC_015672	XLOC_015672	TcSYL_0194400	TcX10_chr42:777992-779802	DCT	TM	OK	372105	950738	1.35334	3.97506	5e-05	0.000105404	yes
XLOC_016236	XLOC_016236	TcSYL_0196470	TcX10_chr43:132903-134779	DCT	TM	OK	277229	707991	1.35265	3.73521	5e-05	0.000105404	yes
XLOC_011428	XLOC_011428	TcSYL_0165520	TcX10_chr34:448049-448683	DCT	TM	OK	48156	122867	1.35131	2.94487	5e-05	0.000105404	yes
XLOC_010588	XLOC_010588	TcSYL_0156620	TcX10_chr31:369519-370945	DCT	TM	OK	101809	259676	1.35085	4.58613	5e-05	0.000105404	yes
XLOC_003166	XLOC_003166	TcSYL_0096110	TcX10_chr13:646930-647594	DCT	TM	OK	273862	697443	1.34862	2.43831	5e-05	0.000105404	yes
XLOC_020010	XLOC_020010	TcSYL_0073100	TcX10_chr8:261893-263181	DCT	TM	OK	132778	33761	1.34634	2.5598	5e-05	0.000105404	yes
XLOC_018823	XLOC_018823	TcSYL_0064180	TcX10_chr7:965767-966062	DCT	TM	OK	156481	397541	1.34511	2.41802	5e-05	0.000105404	yes
XLOC_010544	XLOC_010544	TcSYL_0156050	TcX10_chr31:108800-109524	DCT	TM	OK	678531	172129	1.34301	3.45909	5e-05	0.000105404	yes
XLOC_014135	XLOC_014135	TcSYL_0030960	TcX10_chr4:97017-97804	DCT	TM	OK	359778	912525	1.34276	2.93303	5e-05	0.000105404	yes
XLOC_001846	XLOC_001846	TcSYL_0085030	TcX10_chr11:368973-369337	DCT	TM	OK	123495	312785	1.34072	2.79166	5e-05	0.000105404	yes
XLOC_013362	XLOC_013362	TcSYL_0030780	TcX10_chr4:85580-86397	DCT	TM	OK	89533	225988	1.33575	3.88727	5e-05	0.000105404	yes
XLOC_004744	XLOC_004744	TcSYL_0113580	TcX10_chr18:453178-454007	DCT	TM	OK	761142	191975	1.33468	3.71964	5e-05	0.000105404	yes
XLOC_000753	XLOC_000753	TcSYL_0014580	TcX10_chr1:3079031-3079563	DCT	TM	OK	483293	121728	1.33269	2.56616	5e-05	0.000105404	yes
XLOC_002128	XLOC_002128	TcSYL_0088930	TcX10_chr11:1039511-1043034	DCT	TM	OK	63581	159483	1.32674	2.84525	5e-05	0.000105404	yes
XLOC_016256	XLOC_016256	TcSYL_0196730	TcX10_chr43:154981-155852	DCT	TM	OK	223985	56012	1.32233	2.67039	5e-05	0.000105404	yes
XLOC_020035	XLOC_020035	TcSYL_0074540	TcX10_chr9:8737-10121	DCT	TM	OK	140581	35109	1.32044	2.69417	5e-05	0.000105404	yes
XLOC_018883	XLOC_018883	TcSYL_0064910	TcX10_chr7:1134803-1135680	DCT	TM	OK	476953	118941	1.31832	3.33993	5e-05	0.000105404	yes
XLOC_008049	XLOC_008049	TcSYL_0138330	TcX10_chr25:52369-53393	DCT	TM	OK	387348	965057	1.31698	3.29182	5e-05	0.000105404	yes
XLOC_018833	XLOC_018833	TcSYL_0064280	TcX10_chr7:987141-987775	DCT	TM	OK	423944	105375	1.31359	2.69904	5e-05	0.000105404	yes
XLOC_012972	XLOC_012972	TcSYL_0182270	TcX10_chr39:354629-355113	DCT	TM	OK	553725	137558	1.31279	2.52103	5e-05	0.000105404	yes
XLOC_011991	XLOC_011991	TcSYL_0170990	TcX10_chr36:446145-446671	DCT	TM	OK	120254	298576	1.31201	3.46429	5e-05	0.000105404	yes
XLOC_013039	XLOC_013039	TcSYL_0178590	TcX10_chr39:12707-13197	DCT	TM	OK	570492	141485	1.31037	2.57999	5e-05	0.000105404	yes
XLOC_020215	XLOC_020215	TcSYL_0078620	TcX10_chr9:780105-780460	DCT	TM	OK	622119	1542.5	1.31001	4.15313	5e-05	0.000105404	yes
XLOC_017123	XLOC_017123	TcSYL_0046150	TcX10_chr5:433044-433738	DCT	TM	OK	410842	101761	1.30852	2.77592	5e-05	0.000105404	yes
XLOC_009618	XLOC_009618	TcSYL_0025700	TcX10_chr3:981852-982561	DCT	TM	OK	551402	136.56	1.30835	3.13818	5e-05	0.000105404	yes
XLOC_003196	XLOC_003196	TcSYL_0096590	TcX10_chr13:678987-679630	DCT	TM	OK	465961	115398	1.30834	3.05066	5e-05	0.000105404	yes
XLOC_001616	XLOC_001616	TcSYL_0082350	TcX10_chr10:556659-557161	DCT	TM	OK	815703	201872	1.30733	2.99272	5e-05	0.000105404	yes
XLOC_003288	XLOC_003288	TcSYL_0097810	TcX10_chr13:766327-766946	DCT	TM	OK	375993	928939	1.30488	2.54903	5e-05	0.000105404	yes
XLOC_017198	XLOC_017198	TcSYL_0046980	TcX10_chr5:671529-672232	DCT	TM	OK	923381	228017	1.30414	3.50053	5e-05	0.000105404	yes
XLOC_008285	XLOC_008285	TcSYL_0139700	TcX10_chr26:283633-284759	DCT	TM	OK	43003	106072	1.30253	3.42411	5e-05	0.000105404	yes
XLOC_005841	XLOC_005841	TcSYL_0019250	TcX10_chr2:759264-759772	DCT	TM	OK	42.52	104778	1.30113	2.35769	5e-05	0.000105404	yes
XLOC_004510	XLOC_004510	TcSYL_0112220	TcX10_chr16:1323115-1324259	DCT	TM	OK	411429	101213	1.29869	3.43787	5e-05	0.000105404	yes
XLOC_002272	XLOC_002272	TcSYL_0086750	TcX10_chr11:655009-655727	DCT	TM	OK	298418	733349	1.29717	2.47278	5e-05	0.000105404	yes
XLOC_020392	XLOC_020392	TcSYL_0075130	TcX10_chr9:295481-295803	DCT	TM	OK	339425	833602	1.29627	3.32719	5e-05	0.000105404	yes
XLOC_010595	XLOC_010595	TcSYL_0156690	TcX10_chr31:401301-403237	DCT	TM	OK	357925	877707	1.29408	3.88718	5e-05	0.000105404	yes
XLOC_000062	XLOC_000062	TcSYL_0001320	TcX10_chr1:514462-515048	DCT	TM	OK	658174	161.11	1.29151	3.0209	5e-05	0.000105404	yes
XLOC_020125	XLOC_020125	TcSYL_0077350	TcX10_chr9:673860-675214	DCT	TM	OK	174295	426365	1.29056	2.75592	5e-05	0.000105404	yes
XLOC_008273	XLOC_008273	TcSYL_0139580	TcX10_chr26:229155-230476	DCT	TM	OK	584394	142669	1.28766	3.89661	5e-05	0.000105404	yes
XLOC_005087	XLOC_005087	TcSYL_0116160	TcX10_chr19:598136-598884	DCT	TM	OK	41624	101592	1.28729	2.80094	5e-05	0.000105404	yes
XLOC_017498	XLOC_017498	TcSYL_0048470	TcX10_chr5:1111042-1111577	DCT	TM	OK	485183	118096	1.28336	2.54131	5e-05	0.000105404	yes
XLOC_008277	XLOC_008277	TcSYL_0139620	TcX10_chr26:243986-246042	DCT	TM	OK	647649	157272	1.27998	4.26492	5e-05	0.000105404	yes
XLOC_018879	XLOC_018879	TcSYL_0064870	TcX10_chr7:1125136-1125572	DCT	TM	OK	784573	190443	1.27938	3.03018	5e-05	0.000105404	yes
XLOC_009658	XLOC_009658	TcSYL_0027090	TcX10_chr3:1126245-1127167	DCT	TM	OK	794137	192675	1.27871	3.74276	5e-05	0.000105404	yes
XLOC_004327	XLOC_004327	TcSYL_0108890	TcX10_chr15:924431-925041	DCT	TM	OK	388558	938639	1.27244	2.47797	5e-05	0.000105404	yes
XLOC_001128	XLOC_001128	TcSYL_0008010	TcX10_chr1:1638823-1639700	DCT	TM	OK	106299	256624	1.27153	3.90081	5e-05	0.000105404	yes
XLOC_004962	XLOC_004962	TcSYL_0115590	TcX10_chr19:426279-426937	DCT	TM	OK	444164	107165	1.27067	2.66756	5e-05	0.000105404	yes
XLOC_003757	XLOC_003757	TcSYL_0102900	TcX10_chr14:841894-842789	DCT	TM	OK	298628	720283	1.27022	2.71519	5e-05	0.000105404	yes
XLOC_010766	XLOC_010766	TcSYL_0159850	TcX10_chr32:893120-894021	DCT	TM	OK	243226	586092	1.26883	2.54749	5e-05	0.000105404	yes
XLOC_009087	XLOC_009087	TcSYL_0023450	TcX10_chr3:576024-577339	DCT	TM	OK	393793	947962	1.26739	3.41978	5e-05	0.000105404	yes
XLOC_004502	XLOC_004502	TcSYL_0112140	TcX10_chr16:1312569-1312936	DCT	TM	OK	128.48	309135	1.26669	2.69653	5e-05	0.000105404	yes
XLOC_005367	XLOC_005367	TcSYL_0017210	TcX10_chr2:468105-469126	DCT	TM	OK	838987	201332	1.26286	3.84265	5e-05	0.000105404	yes
XLOC_016266	XLOC_016266	TcSYL_0196850	TcX10_chr43:165100-166346	DCT	TM	OK	527144	126362	1.26129	3.63472	5e-05	0.000105404	yes
XLOC_008041	XLOC_008041	TcSYL_0138250	TcX10_chr25:30969-31330	DCT	TM	OK	218778	524339	1.26103	3.15954	5e-05	0.000105404	yes
XLOC_000652	XLOC_000652	TcSYL_0013100	TcX10_chr1:2475401-2476224	DCT	TM	OK	777397	185777	1.25685	3.52427	5e-05	0.000105404	yes
XLOC_017202	XLOC_017202	TcSYL_0047020	TcX10_chr5:695735-696603	DCT	TM	OK	356676	851908	1.25609	2.84356	5e-05	0.000105404	yes
XLOC_003223	XLOC_003223	TcSYL_0096970	TcX10_chr13:703274-704376	DCT	TM	OK	487343	116373	1.25574	3.44252	5e-05	0.000105404	yes
XLOC_002126	XLOC_002126	TcSYL_0088910	TcX10_chr11:1038201-1038889	DCT	TM	OK	842416	201083	1.25518	3.35648	5e-05	0.000105404	yes
XLOC_015557	XLOC_015557	TcSYL_0192230	TcX10_chr42:505791-506365	DCT	TM	OK	565775	134755	1.25204	2.70501	5e-05	0.000105404	yes
XLOC_010763	XLOC_010763	TcSYL_0159820	TcX10_chr32:886261-886856	DCT	TM	OK	482267	114699	1.24995	2.65066	5e-05	0.000105404	yes
XLOC_020264	XLOC_020264	TcSYL_0079170	TcX10_chr9:969017-969840	DCT	TM	OK	920894	218652	1.24753	3.66383	5e-05	0.000105404	yes
XLOC_002516	XLOC_002516	TcSYL_0091700	TcX10_chr12:551720-552519	DCT	TM	OK	462391	109441	1.24297	2.90135	5e-05	0.000105404	yes
XLOC_004672	XLOC_004672	TcSYL_0110980	TcX10_chr16:922451-922860	DCT	TM	OK	145856	344662	1.24064	3.00805	5e-05	0.000105404	yes
XLOC_009216	XLOC_009216	TcSYL_0025590	TcX10_chr3:974532-975223	DCT	TM	OK	681069	160891	1.24021	3.17637	5e-05	0.000105404	yes
XLOC_010919	XLOC_010919	TcSYL_0159240	TcX10_chr32:571091-571680	DCT	TM	OK	215499	509008	1.24001	3.92738	5e-05	0.000105404	yes
XLOC_008297	XLOC_008297	TcSYL_0139830	TcX10_chr26:305706-306199	DCT	TM	OK	684488	1615.56	1.23894	4.36072	5e-05	0.000105404	yes
XLOC_014078	XLOC_014078	TcSYL_0044730	TcX10_chr4:1496200-1497029	DCT	TM	OK	240664	567727	1.23818	2.38094	5e-05	0.000105404	yes
XLOC_005866	XLOC_005866	TcSYL_0019500	TcX10_chr2:845478-846427	DCT	TM	OK	443488	104598	1.23788	3.06288	5e-05	0.000105404	yes
XLOC_016214	XLOC_016214	TcSYL_0195930	TcX10_chr43:94342-94904	DCT	TM	OK	525558	123.92	1.23748	2.57552	5e-05	0.000105404	yes
XLOC_008658	XLOC_008658	TcSYL_0146030	TcX10_chr28:372260-373767	DCT	TM	OK	453664	106939	1.23709	3.62965	5e-05	0.000105404	yes
XLOC_010453	XLOC_010453	TcSYL_0154520	TcX10_chr30:459102-459748	DCT	TM	OK	450359	106092	1.23616	2.59008	5e-05	0.000105404	yes
XLOC_002366	XLOC_002366	TcSYL_0089370	TcX10_chr12:234599-235263	DCT	TM	OK	506773	119281	1.23495	2.6926	5e-05	0.000105404	yes
XLOC_012128	XLOC_012128	TcSYL_0172120	TcX10_chr37:136856-140709	DCT	TM	OK	329473	77501	1.23406	4.18763	5e-05	0.000105404	yes
XLOC_009277	XLOC_009277	TcSYL_0026440	TcX10_chr3:1033390-1033802	DCT	TM	OK	203651	478673	1.23294	3.29096	5e-05	0.000105404	yes
XLOC_001457	XLOC_001457	TcSYL_0013950	TcX10_chr1:2877255-2877835	DCT	TM	OK	492899	115852	1.23292	2.54185	5e-05	0.000105404	yes
XLOC_004669	XLOC_004669	TcSYL_0110950	TcX10_chr16:912752-913539	DCT	TM	OK	722138	169.7	1.23264	3.3235	5e-05	0.000105404	yes
XLOC_000220	XLOC_000220	TcSYL_0004320	TcX10_chr1:1157402-1158147	DCT	TM	OK	515996	121062	1.23031	2.94046	5e-05	0.000105404	yes
XLOC_001502	XLOC_001502	TcSYL_0080910	TcX10_chr10:401561-402294	DCT	TM	OK	419102	982724	1.22948	2.71876	5e-05	0.000105404	yes
XLOC_008143	XLOC_008143	TcSYL_0139250	TcX10_chr26:68307-68839	DCT	TM	OK	728742	170822	1.22902	2.78412	5e-05	0.000105404	yes
XLOC_020127	XLOC_020127	TcSYL_0077380	TcX10_chr9:676268-676869	DCT	TM	OK	146421	342654	1.22663	3.6275	5e-05	0.000105404	yes
XLOC_010777	XLOC_010777	TcSYL_0159960	TcX10_chr32:923404-924713	DCT	TM	OK	555843	130066	1.22649	3.6034	5e-05	0.000105404	yes
XLOC_009001	XLOC_009001	TcSYL_0147220	TcX10_chr29:195927-196573	DCT	TM	OK	769389	179733	1.22407	3.1354	5e-05	0.000105404	yes
XLOC_019388	XLOC_019388	TcSYL_0063550	TcX10_chr7:621405-622963	DCT	TM	OK	245927	573453	1.22145	4.42706	5e-05	0.000105404	yes
XLOC_009359	XLOC_009359	TcSYL_0027690	TcX10_chr3:1395257-1396119	DCT	TM	OK	111387	259701	1.22127	3.79011	5e-05	0.000105404	yes
XLOC_020285	XLOC_020285	TcSYL_0079380	TcX10_chr9:1033644-1033993	DCT	TM	OK	213478	497468	1.22052	2.96004	5e-05	0.000105404	yes
XLOC_000532	XLOC_000532	TcSYL_0010390	TcX10_chr1:2003852-2004837	DCT	TM	OK	93.84	218645	1.22031	3.76937	5e-05	0.000105404	yes
XLOC_005293	XLOC_005293	TcSYL_0016040	TcX10_chr2:390222-390883	DCT	TM	OK	221855	516623	1.21949	3.92155	5e-05	0.000105404	yes
XLOC_000692	XLOC_000692	TcSYL_0013560	TcX10_chr1:2707761-2708536	DCT	TM	OK	918272	213407	1.21662	3.51208	5e-05	0.000105404	yes
XLOC_005366	XLOC_005366	TcSYL_0017180	TcX10_chr2:466494-467278	DCT	TM	OK	416964	968353	1.21561	2.72705	5e-05	0.000105404	yes
XLOC_014081	XLOC_014081	TcSYL_0044760	TcX10_chr4:1507209-1508440	DCT	TM	OK	118733	275543	1.21456	2.19609	5e-05	0.000105404	yes
XLOC_001867	XLOC_001867	TcSYL_0085370	TcX10_chr11:388572-389581	DCT	TM	OK	684518	158789	1.21395	3.49466	5e-05	0.000105404	yes
XLOC_000047	XLOC_000047	TcSYL_0001170	TcX10_chr1:450604-451940	DCT	TM	OK	200169	464163	1.21341	4.36234	5e-05	0.000105404	yes
XLOC_010742	XLOC_010742	TcSYL_0159610	TcX10_chr32:764172-765082	DCT	TM	OK	968828	223803	1.20792	3.68686	5e-05	0.000105404	yes
XLOC_009069	XLOC_009069	TcSYL_0023270	TcX10_chr3:387140-387624	DCT	TM	OK	153729	354859	1.20686	3.311	5e-05	0.000105404	yes
XLOC_015673	XLOC_015673	TcSYL_0194410	TcX10_chr42:785517-786406	DCT	TM	OK	620527	142786	1.20228	3.23011	5e-05	0.000105404	yes
XLOC_003729	XLOC_003729	TcSYL_0102530	TcX10_chr14:819150-820546	DCT	TM	OK	424604	976461	1.20144	3.40399	5e-05	0.000105404	yes
XLOC_018839	XLOC_018839	TcSYL_0064340	TcX10_chr7:1025082-1025686	DCT	TM	OK	43709	100494	1.20111	2.45057	5e-05	0.000105404	yes
XLOC_003555	XLOC_003555	TcSYL_0103450	TcX10_chr14:875601-876304	DCT	TM	OK	308813	708574	1.19819	2.30316	5e-05	0.000105404	yes
XLOC_015197	XLOC_015197	TcSYL_0188390	TcX10_chr41:249762-251149	DCT	TM	OK	323887	742581	1.19706	3.13643	5e-05	0.000105404	yes
XLOC_004489	XLOC_004489	TcSYL_0112010	TcX10_chr16:1274499-1275334	DCT	TM	OK	959329	219552	1.19447	3.50742	5e-05	0.000105404	yes
XLOC_012585	XLOC_012585	TcSYL_0177150	TcX10_chr38:331774-332741	DCT	TM	OK	189575	432508	1.18996	2.33843	5e-05	0.000105404	yes
XLOC_009517	XLOC_009517	TcSYL_0023010	TcX10_chr3:240061-241118	DCT	TM	OK	863844	196628	1.18663	3.62661	5e-05	0.000105404	yes
XLOC_018820	XLOC_018820	TcSYL_0064150	TcX10_chr7:959500-959891	DCT	TM	OK	178306	405756	1.18626	2.93171	5e-05	0.000105404	yes
XLOC_001869	XLOC_001869	TcSYL_0085390	TcX10_chr11:390442-391079	DCT	TM	OK	134925	306492	1.18369	3.46816	5e-05	0.000105404	yes
XLOC_020345	XLOC_020345	TcSYL_0074650	TcX10_chr9:114316-114761	DCT	TM	OK	147405	334669	1.18295	3.03292	5e-05	0.000105404	yes
XLOC_009500	XLOC_009500	TcSYL_0022810	TcX10_chr3:191025-191587	DCT	TM	OK	142222	322366	1.18056	3.30851	5e-05	0.000105404	yes
XLOC_001305	XLOC_001305	TcSYL_0011030	TcX10_chr1:2166243-2168074	DCT	TM	OK	454922	103034	1.17944	3.59987	5e-05	0.000105404	yes
XLOC_003970	XLOC_003970	TcSYL_0104160	TcX10_chr15:119297-119913	DCT	TM	OK	592082	133909	1.17738	2.70429	5e-05	0.000105404	yes
XLOC_004261	XLOC_004261	TcSYL_0108040	TcX10_chr15:752072-752499	DCT	TM	OK	1674.96	3786.89	1.17689	4.23997	5e-05	0.000105404	yes
XLOC_004862	XLOC_004862	TcSYL_0112950	TcX10_chr18:296680-297758	DCT	TM	OK	657196	148534	1.17639	3.44354	5e-05	0.000105404	yes
XLOC_018790	XLOC_018790	TcSYL_0063210	TcX10_chr7:316395-317155	DCT	TM	OK	908972	205265	1.17518	3.31479	5e-05	0.000105404	yes
XLOC_011850	XLOC_011850	TcSYL_0169150	TcX10_chr36:144419-145221	DCT	TM	OK	425312	958872	1.17282	2.72729	5e-05	0.000105404	yes
XLOC_003274	XLOC_003274	TcSYL_0097640	TcX10_chr13:754973-755670	DCT	TM	OK	743922	167535	1.17124	3.03103	5e-05	0.000105404	yes
XLOC_009237	XLOC_009237	TcSYL_0025870	TcX10_chr3:996082-997070	DCT	TM	OK	160256	360502	1.16963	3.94914	5e-05	0.000105404	yes
XLOC_004652	XLOC_004652	TcSYL_0110780	TcX10_chr16:821670-823426	DCT	TM	OK	693724	154949	1.15936	3.81188	5e-05	0.000105404	yes
XLOC_000948	XLOC_000948	TcSYL_0003390	TcX10_chr1:959501-960303	DCT	TM	OK	315757	704782	1.15836	2.43681	5e-05	0.000105404	yes
XLOC_017219	XLOC_017219	TcSYL_0047190	TcX10_chr5:731404-731876	DCT	TM	OK	860076	191825	1.15725	2.57421	5e-05	0.000105404	yes
XLOC_000244	XLOC_000244	TcSYL_0004560	TcX10_chr1:1203594-1204300	DCT	TM	OK	58.28	129909	1.15643	2.78793	5e-05	0.000105404	yes
XLOC_001470	XLOC_001470	TcSYL_0080590	TcX10_chr10:251607-252379	DCT	TM	OK	557802	123427	1.14584	2.84162	5e-05	0.000105404	yes
XLOC_020424	XLOC_020424	TcSYL_0075450	TcX10_chr9:437578-438899	DCT	TM	OK	112946	249.8	1.14514	3.89371	5e-05	0.000105404	yes
XLOC_017352	XLOC_017352	TcSYL_0045250	TcX10_chr5:195974-196374	DCT	TM	OK	178208	393961	1.14449	2.84385	5e-05	0.000105404	yes
XLOC_012080	XLOC_012080	TcSYL_0171430	TcX10_chr37:14244-15526	DCT	TM	OK	307831	678838	1.14093	2.8719	5e-05	0.000105404	yes
XLOC_003591	XLOC_003591	TcSYL_0100140	TcX10_chr14:251898-252475	DCT	TM	OK	522995	115191	1.13916	2.39104	5e-05	0.000105404	yes
XLOC_001403	XLOC_001403	TcSYL_0012680	TcX10_chr1:2450853-2451523	DCT	TM	OK	418839	922416	1.13902	2.3891	5e-05	0.000105404	yes
XLOC_014517	XLOC_014517	TcSYL_0040150	TcX10_chr4:974481-975337	DCT	TM	OK	280414	617432	1.13872	2.34654	5e-05	0.000105404	yes
XLOC_000973	XLOC_000973	TcSYL_0004740	TcX10_chr1:1258327-1258820	DCT	TM	OK	724261	159451	1.13853	2.47066	5e-05	0.000105404	yes
XLOC_008295	XLOC_008295	TcSYL_0139810	TcX10_chr26:303899-304950	DCT	TM	OK	143267	315395	1.13845	3.84515	5e-05	0.000105404	yes
XLOC_009308	XLOC_009308	TcSYL_0026850	TcX10_chr3:1063639-1064333	DCT	TM	OK	108121	237992	1.13826	3.23337	5e-05	0.000105404	yes
XLOC_009252	XLOC_009252	TcSYL_0026070	TcX10_chr3:1010383-1011056	DCT	TM	OK	526979	115785	1.13563	2.5779	5e-05	0.000105404	yes
XLOC_008301	XLOC_008301	TcSYL_0139870	TcX10_chr26:321776-322167	DCT	TM	OK	244113	536241	1.13533	3.0935	5e-05	0.000105404	yes
XLOC_011911	XLOC_011911	TcSYL_0170060	TcX10_chr36:254002-254291	DCT	TM	OK	294259	645.3	1.13288	2.46637	5e-05	0.000105404	yes
XLOC_009227	XLOC_009227	TcSYL_0025730	TcX10_chr3:983649-984286	DCT	TM	OK	455041	996352	1.13066	2.39269	5e-05	0.000105404	yes
XLOC_004890	XLOC_004890	TcSYL_0113290	TcX10_chr18:345986-346797	DCT	TM	OK	991803	216846	1.12855	3.33959	5e-05	0.000105404	yes
XLOC_004578	XLOC_004578	TcSYL_0109290	TcX10_chr16:181228-182156	DCT	TM	OK	117208	256139	1.12786	3.55916	5e-05	0.000105404	yes
XLOC_001126	XLOC_001126	TcSYL_0007990	TcX10_chr1:1628563-1629608	DCT	TM	OK	511693	111581	1.12474	3.0436	5e-05	0.000105404	yes
XLOC_020504	XLOC_020504	TcSYL_0076440	TcX10_chr9:600910-601337	DCT	TM	OK	110878	240885	1.11938	2.49226	5e-05	0.000105404	yes
XLOC_018791	XLOC_018791	TcSYL_0063220	TcX10_chr7:319659-320833	DCT	TM	OK	137078	297614	1.11845	3.81605	5e-05	0.000105404	yes
XLOC_020571	XLOC_020571	TcSYL_0079070	TcX10_chr9:960704-961095	DCT	TM	OK	223527	485173	1.11805	2.97298	5e-05	0.000105404	yes
XLOC_001282	XLOC_001282	TcSYL_0010790	TcX10_chr1:2081445-2083054	DCT	TM	OK	254276	551866	1.11792	2.81105	5e-05	0.000105404	yes
XLOC_004723	XLOC_004723	TcSYL_0112870	TcX10_chr18:116217-116830	DCT	TM	OK	90472	196251	1.11716	2.86191	5e-05	0.000105404	yes
XLOC_017132	XLOC_017132	TcSYL_0046240	TcX10_chr5:471782-472455	DCT	TM	OK	583689	126375	1.11444	2.64791	5e-05	0.000105404	yes
XLOC_004895	XLOC_004895	TcSYL_0113340	TcX10_chr18:356444-357537	DCT	TM	OK	301703	653052	1.11407	2.57364	5e-05	0.000105404	yes
XLOC_001421	XLOC_001421	TcSYL_0013350	TcX10_chr1:2491897-2492699	DCT	TM	OK	460241	995885	1.11359	2.62175	5e-05	0.000105404	yes
XLOC_009504	XLOC_009504	TcSYL_0022850	TcX10_chr3:200040-200530	DCT	TM	OK	157075	339.65	1.11259	2.9983	5e-05	0.000105404	yes
XLOC_005177	XLOC_005177	TcSYL_0117280	TcX10_chr19:748604-749814	DCT	TM	OK	115855	250168	1.11058	3.7086	5e-05	0.000105404	yes
XLOC_018882	XLOC_018882	TcSYL_0064900	TcX10_chr7:1129925-1130580	DCT	TM	OK	804209	173614	1.11025	2.82454	5e-05	0.000105404	yes
XLOC_005368	XLOC_005368	TcSYL_0017220	TcX10_chr2:469181-470139	DCT	TM	OK	915102	197.52	1.10999	3.38206	5e-05	0.000105404	yes
XLOC_002360	XLOC_002360	TcSYL_0089310	TcX10_chr12:164920-166778	DCT	TM	OK	293156	630992	1.10595	3.03672	5e-05	0.000105404	yes
XLOC_005362	XLOC_005362	TcSYL_0017140	TcX10_chr2:462798-464185	DCT	TM	OK	132452	284.93	1.10514	3.86199	5e-05	0.000105404	yes
XLOC_000250	XLOC_000250	TcSYL_0004620	TcX10_chr1:1220499-1220872	DCT	TM	OK	162529	349092	1.10291	2.53582	5e-05	0.000105404	yes
XLOC_001323	XLOC_001323	TcSYL_0011210	TcX10_chr1:2219644-2220941	DCT	TM	OK	126203	270.9	1.10201	3.83953	5e-05	0.000105404	yes
XLOC_008165	XLOC_008165	TcSYL_0139470	TcX10_chr26:148381-148958	DCT	TM	OK	871979	186812	1.09922	2.71717	5e-05	0.000105404	yes
XLOC_008159	XLOC_008159	TcSYL_0139410	TcX10_chr26:124285-125291	DCT	TM	OK	346453	74186	1.09849	2.60865	5e-05	0.000105404	yes
XLOC_016232	XLOC_016232	TcSYL_0196430	TcX10_chr43:128437-129830	DCT	TM	OK	478807	102369	1.09626	3.21016	5e-05	0.000105404	yes
XLOC_019377	XLOC_019377	TcSYL_0063440	TcX10_chr7:582389-583191	DCT	TM	OK	179966	384.66	1.09586	3.50177	5e-05	0.000105404	yes
XLOC_012962	XLOC_012962	TcSYL_0182130	TcX10_chr39:346765-348113	DCT	TM	OK	321405	684836	1.09137	2.77784	5e-05	0.000105404	yes
XLOC_009624	XLOC_009624	TcSYL_0025940	TcX10_chr3:1000028-1000668	DCT	TM	OK	392645	833287	1.08559	3.77464	5e-05	0.000105404	yes
XLOC_017465	XLOC_017465	TcSYL_0048060	TcX10_chr5:1061045-1061700	DCT	TM	OK	877016	185696	1.08227	2.81005	5e-05	0.000105404	yes
XLOC_004522	XLOC_004522	TcSYL_0112340	TcX10_chr16:1381226-1382583	DCT	TM	OK	615687	130279	1.08134	3.23395	5e-05	0.000105404	yes
XLOC_000485	XLOC_000485	TcSYL_0009780	TcX10_chr1:1956500-1957779	DCT	TM	OK	285673	604218	1.08071	2.59818	5e-05	0.000105404	yes
XLOC_005117	XLOC_005117	TcSYL_0116480	TcX10_chr19:687812-688392	DCT	TM	OK	123187	260347	1.07958	2.94709	5e-05	0.000105404	yes
XLOC_015576	XLOC_015576	TcSYL_0192570	TcX10_chr42:540888-541546	DCT	TM	OK	73677	155602	1.07858	2.60636	5e-05	0.000105404	yes
XLOC_020081	XLOC_020081	TcSYL_0076690	TcX10_chr9:618709-619694	DCT	TM	OK	453525	955823	1.07556	2.72042	5e-05	0.000105404	yes
XLOC_000701	XLOC_000701	TcSYL_0014060	TcX10_chr1:2936444-2937492	DCT	TM	OK	353919	743379	1.07068	2.62858	5e-05	0.000105404	yes
XLOC_006540	XLOC_006540	TcSYL_0122330	TcX10_chr21:341235-341797	DCT	TM	OK	697431	146371	1.06951	2.44225	5e-05	0.000105404	yes
XLOC_011899	XLOC_011899	TcSYL_0169940	TcX10_chr36:214797-215299	DCT	TM	OK	294059	617082	1.06936	3.3963	5e-05	0.000105404	yes
XLOC_005297	XLOC_005297	TcSYL_0016090	TcX10_chr2:394043-395514	DCT	TM	OK	177021	371469	1.06932	2.29332	5e-05	0.000105404	yes
XLOC_012598	XLOC_012598	TcSYL_0177320	TcX10_chr38:342854-343674	DCT	TM	OK	316957	664912	1.06887	2.24305	5e-05	0.000105404	yes
XLOC_018046	XLOC_018046	TcSYL_0050020	TcX10_chr6:29465-29838	DCT	TM	OK	368638	772627	1.06757	3.10003	5e-05	0.000105404	yes
XLOC_004390	XLOC_004390	TcSYL_0110320	TcX10_chr16:428817-429598	DCT	TM	OK	351395	736251	1.06711	2.26507	5e-05	0.000105404	yes
XLOC_004042	XLOC_004042	TcSYL_0105160	TcX10_chr15:227075-228201	DCT	TM	OK	479406	100372	1.06604	2.89937	5e-05	0.000105404	yes
XLOC_018835	XLOC_018835	TcSYL_0064300	TcX10_chr7:990872-991422	DCT	TM	OK	535818	112.14	1.06548	2.18467	5e-05	0.000105404	yes
XLOC_000799	XLOC_000799	TcSYL_0000760	TcX10_chr1:305673-306265	DCT	TM	OK	125968	263346	1.06391	2.94372	5e-05	0.000105404	yes
XLOC_007487	XLOC_007487	TcSYL_0132430	TcX10_chr23:605712-606271	DCT	TM	OK	669918	139.58	1.05903	2.34082	5e-05	0.000105404	yes
XLOC_018878	XLOC_018878	TcSYL_0064860	TcX10_chr7:1121987-1122618	DCT	TM	OK	923336	192293	1.05838	2.81015	5e-05	0.000105404	yes
XLOC_008410	XLOC_008410	TcSYL_0141880	TcX10_chr27:115984-117311	DCT	TM	OK	549695	114456	1.05809	3.12815	5e-05	0.000105404	yes
XLOC_002971	XLOC_002971	TcSYL_0099740	TcX10_chr13:891959-893538	DCT	TM	OK	48443	100526	1.05321	3.16825	5e-05	0.000105404	yes
XLOC_011266	XLOC_011266	TcSYL_0162950	TcX10_chr33:310601-311709	DCT	TM	OK	29422	608533	1.04844	2.4678	5e-05	0.000105404	yes
XLOC_009231	XLOC_009231	TcSYL_0025780	TcX10_chr3:988000-989588	DCT	TM	OK	352918	729902	1.04837	2.91759	5e-05	0.000105404	yes
XLOC_018828	XLOC_018828	TcSYL_0064230	TcX10_chr7:975386-976551	DCT	TM	OK	856491	176929	1.04666	3.29813	5e-05	0.000105404	yes
XLOC_004274	XLOC_004274	TcSYL_0108220	TcX10_chr15:796195-796811	DCT	TM	OK	622433	128375	1.04437	2.43541	5e-05	0.000105404	yes
XLOC_009343	XLOC_009343	TcSYL_0027510	TcX10_chr3:1329428-1330422	DCT	TM	OK	942609	194363	1.04402	3.21584	5e-05	0.000105404	yes
XLOC_001325	XLOC_001325	TcSYL_0011230	TcX10_chr1:2224380-2225002	DCT	TM	OK	616329	126323	1.03534	2.39827	5e-05	0.000105404	yes
XLOC_012214	XLOC_012214	TcSYL_0173600	TcX10_chr37:263131-268463	DCT	TM	OK	54435	111478	1.03416	3.65881	5e-05	0.000105404	yes
XLOC_010577	XLOC_010577	TcSYL_0156510	TcX10_chr31:332341-333065	DCT	TM	OK	135706	277864	1.03389	3.18031	5e-05	0.000105404	yes
XLOC_002102	XLOC_002102	TcSYL_0088610	TcX10_chr11:986087-987030	DCT	TM	OK	31361	641922	1.03343	2.29838	5e-05	0.000105404	yes
XLOC_017425	XLOC_017425	TcSYL_0047660	TcX10_chr5:926060-928668	DCT	TM	OK	346353	707513	1.03051	3.24748	5e-05	0.000105404	yes
XLOC_018871	XLOC_018871	TcSYL_0064780	TcX10_chr7:1103097-1104169	DCT	TM	OK	412589	841.81	1.02879	3.74308	5e-05	0.000105404	yes
XLOC_010928	XLOC_010928	TcSYL_0159350	TcX10_chr32:581209-582479	DCT	TM	OK	450267	91302	1.01987	2.85046	5e-05	0.000105404	yes
XLOC_020221	XLOC_020221	TcSYL_0078680	TcX10_chr9:795445-796472	DCT	TM	OK	848072	171532	1.01622	3.07584	5e-05	0.000105404	yes
XLOC_004490	XLOC_004490	TcSYL_0112020	TcX10_chr16:1276312-1276943	DCT	TM	OK	595443	120.26	1.01412	2.31104	5e-05	0.000105404	yes
XLOC_007426	XLOC_007426	TcSYL_0131690	TcX10_chr23:559997-561015	DCT	TM	OK	367661	742475	1.01397	2.44347	5e-05	0.000105404	yes
XLOC_019850	XLOC_019850	TcSYL_0073350	TcX10_chr8:316463-316974	DCT	TM	OK	780579	157374	1.01158	2.26168	5e-05	0.000105404	yes
XLOC_008144	XLOC_008144	TcSYL_0139260	TcX10_chr26:69841-70358	DCT	TM	OK	112035	225818	1.01121	2.59521	5e-05	0.000105404	yes
XLOC_004218	XLOC_004218	TcSYL_0107490	TcX10_chr15:630702-632689	DCT	TM	OK	32067	64622	1.01094	2.9051	5e-05	0.000105404	yes
XLOC_004153	XLOC_004153	TcSYL_0106820	TcX10_chr15:394639-396098	DCT	TM	OK	251801	506.43	1.00808	3.66653	5e-05	0.000105404	yes
XLOC_006041	XLOC_006041	TcSYL_0118210	TcX10_chr20:186869-187764	DCT	TM	OK	799388	160642	1.00688	2.86734	5e-05	0.000105404	yes
XLOC_000567	XLOC_000567	TcSYL_0011550	TcX10_chr1:2339329-2339939	DCT	TM	OK	777532	155639	1.00123	2.42633	5e-05	0.000105404	yes
XLOC_004658	XLOC_004658	TcSYL_0110840	TcX10_chr16:874005-875623	DCT	TM	OK	902027	180554	1.00119	3.39054	5e-05	0.000105404	yes
XLOC_012116	XLOC_012116	TcSYL_0171980	TcX10_chr37:120773-121995	DCT	TM	OK	311283	354775	3.5106	4.29753	5e-05	0.000105404	yes
XLOC_019891	XLOC_019891	TcSYL_0073770	TcX10_chr8:855064-855722	DCT	TM	OK	768186	840486	3.4517	4.63043	5e-05	0.000105404	yes
XLOC_009661	XLOC_009661	TcSYL_0027120	TcX10_chr3:1133001-1133509	DCT	TM	OK	184314	1750.83	3.2478	9.58711	5e-05	0.000105404	yes
XLOC_004034	XLOC_004034	TcSYL_0105030	TcX10_chr15:219128-220476	DCT	TM	OK	295299	252774	3.0976	3.7649	5e-05	0.000105404	yes
XLOC_011303	XLOC_011303	TcSYL_0163540	TcX10_chr33:342152-342984	DCT	TM	OK	20253	163513	3.0132	5.81079	5e-05	0.000105404	yes
XLOC_004710	XLOC_004710	TcSYL_0112740	TcX10_chr18:50130-51442	DCT	TM	OK	17288	125374	2.8584	6.54147	5e-05	0.000105404	yes
XLOC_014768	XLOC_014768	TcSYL_0043830	TcX10_chr4:1343802-1344439	DCT	TM	OK	110643	764924	2.7894	4.03488	5e-05	0.000105404	yes
XLOC_000549	XLOC_000549	TcSYL_0010610	TcX10_chr1:2018985-2019532	DCT	TM	OK	141849	920719	2.6984	3.58362	5e-05	0.000105404	yes
XLOC_009505	XLOC_009505	TcSYL_0022860	TcX10_chr3:207460-207902	DCT	TM	OK	42.13	267348	2.6658	4.5191	5e-05	0.000105404	yes
XLOC_020244	XLOC_020244	TcSYL_0078920	TcX10_chr9:910333-910958	DCT	TM	OK	136665	839508	2.6189	3.64879	5e-05	0.000105404	yes
XLOC_003233	XLOC_003233	TcSYL_0097110	TcX10_chr13:719907-720622	DCT	TM	OK	319511	195522	2.6134	5.53138	5e-05	0.000105404	yes
XLOC_006519	XLOC_006519	TcSYL_0122100	TcX10_chr21:285484-286238	DCT	TM	OK	153153	852368	2.4765	4.30047	5e-05	0.000105404	yes
XLOC_009668	XLOC_009668	TcSYL_0027190	TcX10_chr3:1160526-1160881	DCT	TM	OK	105387	529.27	2.3283	4.73116	5e-05	0.000105404	yes
XLOC_020273	XLOC_020273	TcSYL_0079260	TcX10_chr9:988377-988720	DCT	TM	OK	549455	260788	2.2468	4.52303	5e-05	0.000105404	yes
XLOC_009016	XLOC_009016	TcSYL_0147370	TcX10_chr29:264608-265104	DCT	TM	OK	702612	305167	2.1188	4.72287	5e-05	0.000105404	yes
XLOC_000504	XLOC_000504	TcSYL_0010040	TcX10_chr1:1973947-1974428	DCT	TM	OK	251868	105332	2.0642	3.5293	5e-05	0.000105404	yes
XLOC_000303	XLOC_000303	TcSYL_0005290	TcX10_chr1:1361887-1362608	DCT	TM	OK	182647	740738	2.0199	3.3817	5e-05	0.000105404	yes
XLOC_004655	XLOC_004655	TcSYL_0110810	TcX10_chr16:830866-831770	DCT	TM	OK	355427	139014	1.9676	4.61265	5e-05	0.000105404	yes
XLOC_016244	XLOC_016244	TcSYL_0196590	TcX10_chr43:146096-146502	DCT	TM	OK	480475	185914	1.9521	3.95012	5e-05	0.000105404	yes
XLOC_012912	XLOC_012912	TcSYL_0181400	TcX10_chr39:286289-286662	DCT	TM	OK	124163	477.81	1.9442	4.27902	5e-05	0.000105404	yes
XLOC_009105	XLOC_009105	TcSYL_0023700	TcX10_chr3:630036-631648	DCT	TM	OK	205478	784997	1.9337	4.82322	5e-05	0.000105404	yes
XLOC_010591	XLOC_010591	TcSYL_0156650	TcX10_chr31:392912-393834	DCT	TM	OK	233733	879057	1.9111	6.63692	5e-05	0.000105404	yes
XLOC_007386	XLOC_007386	TcSYL_0131240	TcX10_chr23:524383-525416	DCT	TM	OK	216265	809144	1.9036	4.11387	5e-05	0.000105404	yes
XLOC_015758	XLOC_015758	TcSYL_0191610	TcX10_chr42:408051-409627	DCT	TM	OK	412366	152997	1.8915	5.66852	5e-05	0.000105404	yes
XLOC_020100	XLOC_020100	TcSYL_0076970	TcX10_chr9:643143-643660	DCT	TM	OK	102985	379747	1.8826	4.7555	5e-05	0.000105404	yes
XLOC_018113	XLOC_018113	TcSYL_0051870	TcX10_chr6:473254-474335	DCT	TM	OK	141383	518488	1.8747	3.6247	5e-05	0.000105404	yes
XLOC_001845	XLOC_001845	TcSYL_0085020	TcX10_chr11:368470-368903	DCT	TM	OK	652117	230203	1.8197	4.21081	5e-05	0.000105404	yes
XLOC_013368	XLOC_013368	TcSYL_0030860	TcX10_chr4:89754-90244	DCT	TM	OK	146993	486841	1.7277	4.70141	5e-05	0.000105404	yes
XLOC_012146	XLOC_012146	TcSYL_0172330	TcX10_chr37:155419-155957	DCT	TM	OK	38826	128004	1.7211	3.21824	5e-05	0.000105404	yes
XLOC_002192	XLOC_002192	TcSYL_0084150	TcX10_chr11:227216-227730	DCT	TM	OK	65.86	205933	1.6447	3.57501	5e-05	0.000105404	yes
XLOC_002555	XLOC_002555	TcSYL_0092380	TcX10_chr12:1000053-1000648	DCT	TM	OK	442772	138274	1.6429	3.38423	5e-05	0.000105404	yes
XLOC_000676	XLOC_000676	TcSYL_0013400	TcX10_chr1:2494670-2495190	DCT	TM	OK	262167	79883	1.6074	2.52995	5e-05	0.000105404	yes
XLOC_003248	XLOC_003248	TcSYL_0097270	TcX10_chr13:731713-732875	DCT	TM	OK	564111	166595	1.5623	4.55548	5e-05	0.000105404	yes
XLOC_004304	XLOC_004304	TcSYL_0108660	TcX10_chr15:853543-854924	DCT	TM	OK	641032	184021	1.5214	4.78589	5e-05	0.000105404	yes
XLOC_013124	XLOC_013124	TcSYL_0179730	TcX10_chr39:128895-129745	DCT	TM	OK	316593	905885	1.5167	3.26989	5e-05	0.000105404	yes
XLOC_000516	XLOC_000516	TcSYL_0010190	TcX10_chr1:1987254-1987723	DCT	TM	OK	633437	174942	1.4656	2.93298	5e-05	0.000105404	yes
XLOC_009290	XLOC_009290	TcSYL_0026620	TcX10_chr3:1049005-1049681	DCT	TM	OK	352631	959814	1.4446	2.91286	5e-05	0.000105404	yes
XLOC_002113	XLOC_002113	TcSYL_0088720	TcX10_chr11:1019248-1020599	DCT	TM	OK	360904	980499	1.4419	3.96996	5e-05	0.000105404	yes
XLOC_002542	XLOC_002542	TcSYL_0092250	TcX10_chr12:966664-968726	DCT	TM	OK	240959	650425	1.4326	4.00779	5e-05	0.000105404	yes
XLOC_004175	XLOC_004175	TcSYL_0107040	TcX10_chr15:525823-527795	DCT	TM	OK	339798	897791	1.4017	4.13466	5e-05	0.000105404	yes
XLOC_008648	XLOC_008648	TcSYL_0145920	TcX10_chr28:360506-362007	DCT	TM	OK	31658	806331	1.3488	3.65035	5e-05	0.000105404	yes
XLOC_004663	XLOC_004663	TcSYL_0110890	TcX10_chr16:889000-889793	DCT	TM	OK	759563	191235	1.3321	3.6072	5e-05	0.000105404	yes
XLOC_003296	XLOC_003296	TcSYL_0097910	TcX10_chr13:772889-774009	DCT	TM	OK	768372	186785	1.2815	3.84772	5e-05	0.000105404	yes
XLOC_010945	XLOC_010945	TcSYL_0159520	TcX10_chr32:690437-691197	DCT	TM	OK	109349	264641	1.2751	3.82632	5e-05	0.000105404	yes
XLOC_020370	XLOC_020370	TcSYL_0074910	TcX10_chr9:197727-198079	DCT	TM	OK	199857	481513	1.2686	3.08838	5e-05	0.000105404	yes
XLOC_009543	XLOC_009543	TcSYL_0023740	TcX10_chr3:651444-652126	DCT	TM	OK	760092	179495	1.2397	3.19116	5e-05	0.000105404	yes
XLOC_003778	XLOC_003778	TcSYL_0103220	TcX10_chr14:859705-860405	DCT	TM	OK	505033	119172	1.2386	2.8349	5e-05	0.000105404	yes
XLOC_020136	XLOC_020136	TcSYL_0077480	TcX10_chr9:681289-682295	DCT	TM	OK	21089	479188	1.1841	2.32418	5e-05	0.000105404	yes
XLOC_013414	XLOC_013414	TcSYL_0031600	TcX10_chr4:140799-141634	DCT	TM	OK	481155	108513	1.1733	2.8086	5e-05	0.000105404	yes
XLOC_002226	XLOC_002226	TcSYL_0084940	TcX10_chr11:362206-362702	DCT	TM	OK	865378	192293	1.1519	2.90068	5e-05	0.000105404	yes
XLOC_020077	XLOC_020077	TcSYL_0076650	TcX10_chr9:616347-617359	DCT	TM	OK	477495	105.53	1.1441	2.9726	5e-05	0.000105404	yes
XLOC_020241	XLOC_020241	TcSYL_0078890	TcX10_chr9:868710-870088	DCT	TM	OK	104664	223853	1.0968	3.72366	5e-05	0.000105404	yes
XLOC_008131	XLOC_008131	TcSYL_0139130	TcX10_chr26:28519-29108	DCT	TM	OK	898631	190343	1.0828	2.72655	5e-05	0.000105404	yes
XLOC_005305	XLOC_005305	TcSYL_0016170	TcX10_chr2:398893-399878	DCT	TM	OK	742318	154479	1.0573	2.96425	5e-05	0.000105404	yes
XLOC_004973	XLOC_004973	TcSYL_0115720	TcX10_chr19:453069-454120	DCT	TM	OK	371334	767154	1.0468	2.59701	5e-05	0.000105404	yes
XLOC_005882	XLOC_005882	TcSYL_0019660	TcX10_chr2:882277-882875	DCT	TM	OK	155576	319103	1.0364	3.06962	5e-05	0.000105404	yes
XLOC_000067	XLOC_000067	TcSYL_0001370	TcX10_chr1:536125-536813	DCT	TM	OK	977364	199553	1.0298	2.8249	5e-05	0.000105404	yes
XLOC_005138	XLOC_005138	TcSYL_0116750	TcX10_chr19:708355-709124	DCT	TM	OK	474516	962016	1.0196	2.46614	5e-05	0.000105404	yes
XLOC_014707	XLOC_014707	TcSYL_0043070	TcX10_chr4:1287816-1288414	DCT	TM	OK	695094	140823	1.0186	2.38373	5e-05	0.000105404	yes
XLOC_011835	XLOC_011835	TcSYL_0169000	TcX10_chr36:115757-116235	DCT	TM	OK	302655	158749	2.391	4.46324	5e-05	0.000105404	yes
XLOC_000361	XLOC_000361	TcSYL_0006100	TcX10_chr1:1438724-1439151	DCT	TM	OK	695334	256468	1.883	4.32752	5e-05	0.000105404	yes
XLOC_005078	XLOC_005078	TcSYL_0116070	TcX10_chr19:570016-570488	DCT	TM	OK	879431	171515	0.963694	2.16566	0.0001	0.000203386	yes
XLOC_017645	XLOC_017645	TcSYL_0050830	TcX10_chr6:230975-231984	DCT	TM	OK	561985	107963	0.941936	2.54872	0.0001	0.000203386	yes
XLOC_004780	XLOC_004780	TcSYL_0114030	TcX10_chr18:506660-507585	DCT	TM	OK	375259	719952	0.940014	2.23619	0.0001	0.000203386	yes
XLOC_017582	XLOC_017582	TcSYL_0050100	TcX10_chr6:71555-72117	DCT	TM	OK	108.06	205529	0.927512	2.44304	0.0001	0.000203386	yes
XLOC_012827	XLOC_012827	TcSYL_0180030	TcX10_chr39:156991-157844	DCT	TM	OK	455147	863809	0.92438	2.14656	0.0001	0.000203386	yes
XLOC_009310	XLOC_009310	TcSYL_0026870	TcX10_chr3:1064964-1065649	DCT	TM	OK	656979	122839	0.902848	2.18792	0.0001	0.000203386	yes
XLOC_001952	XLOC_001952	TcSYL_0086510	TcX10_chr11:587316-588271	DCT	TM	OK	361172	668775	0.888833	2.10021	0.0001	0.000203386	yes
XLOC_004077	XLOC_004077	TcSYL_0105640	TcX10_chr15:257871-258343	DCT	TM	OK	124418	229015	0.880246	2.14005	0.0001	0.000203386	yes
XLOC_014089	XLOC_014089	TcSYL_0044850	TcX10_chr4:1533245-1533807	DCT	TM	OK	960658	176521	0.877743	2.18785	0.0001	0.000203386	yes
XLOC_005176	XLOC_005176	TcSYL_0117270	TcX10_chr19:748032-748567	DCT	TM	OK	129219	235894	0.868323	2.27448	0.0001	0.000203386	yes
XLOC_011260	XLOC_011260	TcSYL_0162870	TcX10_chr33:306830-307722	DCT	TM	OK	511296	913391	0.837073	2.08649	0.0001	0.000203386	yes
XLOC_009674	XLOC_009674	TcSYL_0027250	TcX10_chr3:1177770-1178188	DCT	TM	OK	208477	369788	0.82681	2.20127	0.0001	0.000203386	yes
XLOC_008136	XLOC_008136	TcSYL_0139180	TcX10_chr26:44624-45177	DCT	TM	OK	116641	206.39	0.823297	2.13506	0.0001	0.000203386	yes
XLOC_005996	XLOC_005996	TcSYL_0117740	TcX10_chr20:84217-85184	DCT	TM	OK	477981	842756	0.818161	2.073	0.0001	0.000203386	yes
XLOC_004932	XLOC_004932	TcSYL_0114940	TcX10_chr18:732365-733176	DCT	TM	OK	107565	184133	0.775536	2.27562	0.0001	0.000203386	yes
XLOC_005984	XLOC_005984	TcSYL_0117620	TcX10_chr20:23161-23855	DCT	TM	OK	113314	189704	0.743429	2.09601	0.0001	0.000203386	yes
XLOC_016600	XLOC_016600	TcSYL_0201530	TcX10_chr44:312201-313531	DCT	TM	OK	470682	785852	0.739504	2.07448	0.0001	0.000203386	yes
XLOC_006035	XLOC_006035	TcSYL_0118150	TcX10_chr20:171730-172370	DCT	TM	OK	129799	213803	0.720004	2.03388	0.0001	0.000203386	yes
XLOC_003168	XLOC_003168	TcSYL_0096170	TcX10_chr13:650760-651568	DCT	TM	OK	875318	144014	0.718332	1.96338	0.0001	0.000203386	yes
XLOC_020421	XLOC_020421	TcSYL_0075420	TcX10_chr9:429505-430487	DCT	TM	OK	909442	149516	0.717244	2.14531	0.0001	0.000203386	yes
XLOC_020228	XLOC_020228	TcSYL_0078760	TcX10_chr9:814670-816333	DCT	TM	OK	345112	566971	0.716213	1.96576	0.0001	0.000203386	yes
XLOC_011853	XLOC_011853	TcSYL_0169180	TcX10_chr36:148262-149463	DCT	TM	OK	553533	90544	0.709949	1.98932	0.0001	0.000203386	yes
XLOC_017466	XLOC_017466	TcSYL_0048070	TcX10_chr5:1062086-1063098	DCT	TM	OK	842123	136926	0.701292	2.06386	0.0001	0.000203386	yes
XLOC_008327	XLOC_008327	TcSYL_0140180	TcX10_chr26:394441-395084	DCT	TM	OK	207932	333115	0.679911	2.13085	0.0001	0.000203386	yes
XLOC_000531	XLOC_000531	TcSYL_0010380	TcX10_chr1:2002379-2003484	DCT	TM	OK	968027	154305	0.672668	2.11596	0.0001	0.000203386	yes
XLOC_018840	XLOC_018840	TcSYL_0064350	TcX10_chr7:1027952-1028289	DCT	TM	OK	621881	989217	0.669649	2.04429	0.0001	0.000203386	yes
XLOC_005878	XLOC_005878	TcSYL_0019620	TcX10_chr2:874230-876088	DCT	TM	OK	508444	796495	0.647576	2.00497	0.0001	0.000203386	yes
XLOC_017164	XLOC_017164	TcSYL_0046640	TcX10_chr5:572924-574425	DCT	TM	OK	998002	154914	0.634349	2.0597	0.0001	0.000203386	yes
XLOC_001677	XLOC_001677	TcSYL_0080390	TcX10_chr10:144569-145710	DCT	TM	OK	129.71	198204	0.611697	2.04026	0.0001	0.000203386	yes
XLOC_000654	XLOC_000654	TcSYL_0013120	TcX10_chr1:2477207-2479995	DCT	TM	OK	555007	846674	0.609299	2.08236	0.0001	0.000203386	yes
XLOC_002089	XLOC_002089	TcSYL_0088450	TcX10_chr11:900816-902515	DCT	TM	OK	112368	170142	0.598502	2.10166	0.0001	0.000203386	yes
XLOC_000685	XLOC_000685	TcSYL_0013490	TcX10_chr1:2521545-2522248	DCT	TM	OK	204583	307369	0.587283	1.90777	0.0001	0.000203386	yes
XLOC_004579	XLOC_004579	TcSYL_0109300	TcX10_chr16:182973-184240	DCT	TM	OK	163.4	243621	0.57623	2.01049	0.0001	0.000203386	yes
XLOC_008042	XLOC_008042	TcSYL_0138260	TcX10_chr25:31480-32327	DCT	TM	OK	349254	511096	0.549318	1.95887	0.0001	0.000203386	yes
XLOC_000236	XLOC_000236	TcSYL_0004480	TcX10_chr1:1189520-1190793	DCT	TM	OK	142234	207901	0.547628	1.88299	0.0001	0.000203386	yes
XLOC_005036	XLOC_005036	TcSYL_0115140	TcX10_chr19:250924-251321	DCT	TM	OK	2382.56	3480.48	0.546774	1.99666	0.0001	0.000203386	yes
XLOC_000014	XLOC_000014	TcSYL_0000360	TcX10_chr1:83488-85124	DCT	TM	OK	133178	194252	0.544575	1.92852	0.0001	0.000203386	yes
XLOC_020249	XLOC_020249	TcSYL_0078980	TcX10_chr9:934206-935899	DCT	TM	OK	175215	255457	0.543959	1.96827	0.0001	0.000203386	yes
XLOC_000206	XLOC_000206	TcSYL_0004180	TcX10_chr1:1116477-1117891	DCT	TM	OK	120921	176008	0.541573	1.85533	0.0001	0.000203386	yes
XLOC_011730	XLOC_011730	TcSYL_0167130	TcX10_chr35:316701-317797	DCT	TM	OK	303003	439157	0.535408	1.96215	0.0001	0.000203386	yes
XLOC_020276	XLOC_020276	TcSYL_0079290	TcX10_chr9:990583-992063	DCT	TM	OK	261043	369269	0.500382	1.84031	0.0001	0.000203386	yes
XLOC_017116	XLOC_017116	TcSYL_0046030	TcX10_chr5:412752-413134	DCT	TM	OK	112703	225248	4.32091	5.59797	0.0001	0.000203386	yes
XLOC_016247	XLOC_016247	TcSYL_0196630	TcX10_chr43:148536-149026	DCT	TM	OK	758092	131094	4.11208	4.83619	0.0001	0.000203386	yes
XLOC_019849	XLOC_019849	TcSYL_0073340	TcX10_chr8:307191-307645	DCT	TM	OK	776067	668547	3.10678	3.60028	0.0001	0.000203386	yes
XLOC_010892	XLOC_010892	TcSYL_0158760	TcX10_chr32:524626-525233	DCT	TM	OK	559004	467826	3.06504	3.51241	0.0001	0.000203386	yes
XLOC_000354	XLOC_000354	TcSYL_0005980	TcX10_chr1:1410686-1411116	DCT	TM	OK	122614	100485	3.03478	4.03192	0.0001	0.000203386	yes
XLOC_017156	XLOC_017156	TcSYL_0046500	TcX10_chr5:564800-565224	DCT	TM	OK	104754	854887	3.02873	3.71985	0.0001	0.000203386	yes
XLOC_005129	XLOC_005129	TcSYL_0116630	TcX10_chr19:698913-699454	DCT	TM	OK	868029	568721	2.71191	3.24684	0.0001	0.000203386	yes
XLOC_020237	XLOC_020237	TcSYL_0078850	TcX10_chr9:860132-860400	DCT	TM	OK	592126	380273	2.68306	2.76552	0.0001	0.000203386	yes
XLOC_007433	XLOC_007433	TcSYL_0131790	TcX10_chr23:567354-567691	DCT	TM	OK	316587	178716	2.49699	4.25195	0.0001	0.000203386	yes
XLOC_014008	XLOC_014008	TcSYL_0043400	TcX10_chr4:1316448-1316950	DCT	TM	OK	153943	608842	1.98367	2.83053	0.0001	0.000203386	yes
XLOC_004181	XLOC_004181	TcSYL_0107100	TcX10_chr15:556888-557216	DCT	TM	OK	427415	156847	1.87565	2.37626	0.0001	0.000203386	yes
XLOC_007368	XLOC_007368	TcSYL_0130940	TcX10_chr23:504322-506915	DCT	TM	OK	311554	108721	1.80308	2.75974	0.0001	0.000203386	yes
XLOC_007402	XLOC_007402	TcSYL_0131420	TcX10_chr23:538816-539291	DCT	TM	OK	229377	784804	1.77461	2.84706	0.0001	0.000203386	yes
XLOC_004264	XLOC_004264	TcSYL_0108080	TcX10_chr15:785824-786404	DCT	TM	OK	173683	582921	1.74684	2.72122	0.0001	0.000203386	yes
XLOC_001476	XLOC_001476	TcSYL_0080650	TcX10_chr10:289954-290372	DCT	TM	OK	389843	130298	1.74086	2.79604	0.0001	0.000203386	yes
XLOC_014668	XLOC_014668	TcSYL_0042560	TcX10_chr4:1231706-1232511	DCT	TM	OK	112021	359462	1.68207	2.41305	0.0001	0.000203386	yes
XLOC_006442	XLOC_006442	TcSYL_0123560	TcX10_chr21:593276-593928	DCT	TM	OK	170691	540277	1.66231	2.49463	0.0001	0.000203386	yes
XLOC_002768	XLOC_002768	TcSYL_0094640	TcX10_chr13:425607-425986	DCT	TM	OK	678497	211268	1.63866	3.54865	0.0001	0.000203386	yes
XLOC_018825	XLOC_018825	TcSYL_0064200	TcX10_chr7:971383-971903	DCT	TM	OK	240344	735197	1.61303	2.71962	0.0001	0.000203386	yes
XLOC_004385	XLOC_004385	TcSYL_0110270	TcX10_chr16:417191-418419	DCT	TM	OK	675872	191495	1.50248	2.14935	0.0001	0.000203386	yes
XLOC_006229	XLOC_006229	TcSYL_0118320	TcX10_chr20:296009-296502	DCT	TM	OK	385385	985292	1.35425	2.27771	0.0001	0.000203386	yes
XLOC_015957	XLOC_015957	TcSYL_0195620	TcX10_chr43:74004-74401	DCT	TM	OK	715452	171758	1.26345	2.30301	0.0001	0.000203386	yes
XLOC_010867	XLOC_010867	TcSYL_0158360	TcX10_chr32:499824-500326	DCT	TM	OK	383112	884846	1.20766	2.07286	0.0001	0.000203386	yes
XLOC_017641	XLOC_017641	TcSYL_0050790	TcX10_chr6:224756-225297	DCT	TM	OK	489285	112264	1.19815	2.45961	0.0001	0.000203386	yes
XLOC_000958	XLOC_000958	TcSYL_0003770	TcX10_chr1:1068763-1069136	DCT	TM	OK	109414	235964	1.10877	2.25218	0.0001	0.000203386	yes
XLOC_017150	XLOC_017150	TcSYL_0046420	TcX10_chr5:543237-543733	DCT	TM	OK	622953	131614	1.07912	2.17434	0.0001	0.000203386	yes
XLOC_012163	XLOC_012163	TcSYL_0172570	TcX10_chr37:168437-168789	DCT	TM	OK	118559	249233	1.07189	2.13614	0.0001	0.000203386	yes
XLOC_008048	XLOC_008048	TcSYL_0138320	TcX10_chr25:51854-52329	DCT	TM	OK	613842	128398	1.06468	2.10336	0.0001	0.000203386	yes
XLOC_003191	XLOC_003191	TcSYL_0096530	TcX10_chr13:675187-676115	DCT	TM	OK	300542	624782	1.05579	2.30017	0.0001	0.000203386	yes
XLOC_012960	XLOC_012960	TcSYL_0182110	TcX10_chr39:345159-345826	DCT	TM	OK	425342	852994	1.00391	2.06766	0.0001	0.000203386	yes
XLOC_014736	XLOC_014736	TcSYL_0043410	TcX10_chr4:1317196-1317641	DCT	TM	OK	108687	907739	3.0621	3.84879	0.0001	0.000203386	yes
XLOC_002130	XLOC_002130	TcSYL_0088950	TcX10_chr11:1047221-1047618	DCT	TM	OK	193573	853965	2.1413	3.05874	0.0001	0.000203386	yes
XLOC_002874	XLOC_002874	TcSYL_0096380	TcX10_chr13:666413-666891	DCT	TM	OK	284119	820155	1.5294	2.28252	0.0001	0.000203386	yes
XLOC_020242	XLOC_020242	TcSYL_0078900	TcX10_chr9:871186-871697	DCT	TM	OK	453738	113479	1.3225	2.34172	0.0001	0.000203386	yes
XLOC_017360	XLOC_017360	TcSYL_0045330	TcX10_chr5:224723-225363	DCT	TM	OK	508998	105602	1.0529	2.27774	0.0001	0.000203386	yes
XLOC_014783	XLOC_014783	TcSYL_0044000	TcX10_chr4:1359641-1360203	DCT	TM	OK	647727	124836	0.946577	2.07425	0.00015	0.000298501	yes
XLOC_012961	XLOC_012961	TcSYL_0182120	TcX10_chr39:345886-346541	DCT	TM	OK	463217	884931	0.933878	1.97502	0.00015	0.000298501	yes
XLOC_008493	XLOC_008493	TcSYL_0142520	TcX10_chr27:217241-217743	DCT	TM	OK	676861	128695	0.927029	1.9316	0.00015	0.000298501	yes
XLOC_008129	XLOC_008129	TcSYL_0139110	TcX10_chr26:21566-21972	DCT	TM	OK	135109	254829	0.915409	2.11446	0.00015	0.000298501	yes
XLOC_020083	XLOC_020083	TcSYL_0076710	TcX10_chr9:621546-622171	DCT	TM	OK	722748	131247	0.860721	2.06697	0.00015	0.000298501	yes
XLOC_008040	XLOC_008040	TcSYL_0138240	TcX10_chr25:30559-30911	DCT	TM	OK	259177	469265	0.856467	2.13964	0.00015	0.000298501	yes
XLOC_008985	XLOC_008985	TcSYL_0147020	TcX10_chr29:99583-100193	DCT	TM	OK	80653	144969	0.845946	2.00995	0.00015	0.000298501	yes
XLOC_018885	XLOC_018885	TcSYL_0064930	TcX10_chr7:1136852-1137858	DCT	TM	OK	535073	948865	0.826466	2.14509	0.00015	0.000298501	yes
XLOC_011957	XLOC_011957	TcSYL_0170580	TcX10_chr36:404922-406132	DCT	TM	OK	359589	631587	0.812633	1.99218	0.00015	0.000298501	yes
XLOC_000568	XLOC_000568	TcSYL_0011560	TcX10_chr1:2340976-2341349	DCT	TM	OK	215256	378057	0.812552	2.06192	0.00015	0.000298501	yes
XLOC_015196	XLOC_015196	TcSYL_0188380	TcX10_chr41:248415-249439	DCT	TM	OK	528095	896394	0.763334	2.01835	0.00015	0.000298501	yes
XLOC_003777	XLOC_003777	TcSYL_0103210	TcX10_chr14:858885-859597	DCT	TM	OK	921023	154236	0.743831	2.00729	0.00015	0.000298501	yes
XLOC_001314	XLOC_001314	TcSYL_0011120	TcX10_chr1:2190838-2191892	DCT	TM	OK	620193	102982	0.731606	2.05433	0.00015	0.000298501	yes
XLOC_004947	XLOC_004947	TcSYL_0115440	TcX10_chr19:349602-350491	DCT	TM	OK	103335	169187	0.711286	2.1155	0.00015	0.000298501	yes
XLOC_013078	XLOC_013078	TcSYL_0179150	TcX10_chr39:64129-65408	DCT	TM	OK	465684	758578	0.703946	1.9025	0.00015	0.000298501	yes
XLOC_014075	XLOC_014075	TcSYL_0044700	TcX10_chr4:1492289-1493235	DCT	TM	OK	875914	140.54	0.682122	1.99197	0.00015	0.000298501	yes
XLOC_006439	XLOC_006439	TcSYL_0123520	TcX10_chr21:588657-589669	DCT	TM	OK	848181	133695	0.656497	1.93787	0.00015	0.000298501	yes
XLOC_000518	XLOC_000518	TcSYL_0010210	TcX10_chr1:1989102-1990132	DCT	TM	OK	951822	145422	0.611484	1.87285	0.00015	0.000298501	yes
XLOC_016768	XLOC_016768	TcSYL_0203320	TcX10_chr46:267362-269130	DCT	TM	OK	760032	115727	0.60659	2.00931	0.00015	0.000298501	yes
XLOC_006449	XLOC_006449	TcSYL_0123640	TcX10_chr21:605877-606598	DCT	TM	OK	162177	246113	0.60175	1.84876	0.00015	0.000298501	yes
XLOC_017428	XLOC_017428	TcSYL_0047690	TcX10_chr5:935001-935485	DCT	TM	OK	419905	617676	0.556788	1.83588	0.00015	0.000298501	yes
XLOC_009670	XLOC_009670	TcSYL_0027210	TcX10_chr3:1167277-1169501	DCT	TM	OK	104497	153627	0.555966	1.98399	0.00015	0.000298501	yes
XLOC_001659	XLOC_001659	TcSYL_0083370	TcX10_chr10:1051754-1053384	DCT	TM	OK	124639	182729	0.551946	1.92055	0.00015	0.000298501	yes
XLOC_019904	XLOC_019904	TcSYL_0073900	TcX10_chr8:878483-881442	DCT	TM	OK	868998	126558	0.542376	1.95663	0.00015	0.000298501	yes
XLOC_017149	XLOC_017149	TcSYL_0046410	TcX10_chr5:537499-538520	DCT	TM	OK	236157	339393	0.523207	1.84889	0.00015	0.000298501	yes
XLOC_008523	XLOC_008523	TcSYL_0142820	TcX10_chr27:378973-379733	DCT	TM	OK	1923.02	2751.49	0.516842	1.78529	0.00015	0.000298501	yes
XLOC_005409	XLOC_005409	TcSYL_0018140	TcX10_chr2:541716-542200	DCT	TM	OK	700103	110622	3.98193	4.49046	0.00015	0.000298501	yes
XLOC_000944	XLOC_000944	TcSYL_0003350	TcX10_chr1:950379-950806	DCT	TM	OK	105162	998098	3.24657	4.29323	0.00015	0.000298501	yes
XLOC_000965	XLOC_000965	TcSYL_0003870	TcX10_chr1:1074788-1075152	DCT	TM	OK	141991	108749	2.93713	3.85156	0.00015	0.000298501	yes
XLOC_007099	XLOC_007099	TcSYL_0129500	TcX10_chr23:233757-234346	DCT	TM	OK	660382	467886	2.82479	3.27741	0.00015	0.000298501	yes
XLOC_001442	XLOC_001442	TcSYL_0013800	TcX10_chr1:2807374-2808839	DCT	TM	OK	237423	12306	2.37383	2.63103	0.00015	0.000298501	yes
XLOC_004310	XLOC_004310	TcSYL_0108720	TcX10_chr15:872564-872811	DCT	TM	OK	159811	716046	2.16368	6.29033	0.00015	0.000298501	yes
XLOC_003036	XLOC_003036	TcSYL_0093530	TcX10_chr13:197086-197375	DCT	TM	OK	747991	287501	1.94248	2.63225	0.00015	0.000298501	yes
XLOC_011378	XLOC_011378	TcSYL_0164790	TcX10_chr34:397791-398137	DCT	TM	OK	484168	167.35	1.78929	3.30793	0.00015	0.000298501	yes
XLOC_005218	XLOC_005218	TcSYL_0014950	TcX10_chr2:159937-160385	DCT	TM	OK	320112	921777	1.52584	2.28446	0.00015	0.000298501	yes
XLOC_006235	XLOC_006235	TcSYL_0118380	TcX10_chr20:314063-314514	DCT	TM	OK	332549	955563	1.52278	2.30625	0.00015	0.000298501	yes
XLOC_009342	XLOC_009342	TcSYL_0027500	TcX10_chr3:1328775-1329127	DCT	TM	OK	886948	212.97	1.26373	2.2693	0.00015	0.000298501	yes
XLOC_010576	XLOC_010576	TcSYL_0156500	TcX10_chr31:329875-330332	DCT	TM	OK	556592	128.71	1.20943	2.19539	0.00015	0.000298501	yes
XLOC_009086	XLOC_009086	TcSYL_0023440	TcX10_chr3:571418-571845	DCT	TM	OK	755923	157821	1.06198	2.11918	0.00015	0.000298501	yes
XLOC_008169	XLOC_008169	TcSYL_0139950	TcX10_chr26:342239-342543	DCT	TM	OK	323787	650798	1.00717	2.34137	0.00015	0.000298501	yes
XLOC_003050	XLOC_003050	TcSYL_0093720	TcX10_chr13:303159-305836	DCT	TM	OK	210204	758524	1.8514	2.40505	0.00015	0.000298501	yes
XLOC_008079	XLOC_008079	TcSYL_0138640	TcX10_chr25:187048-187424	DCT	TM	OK	446852	143104	1.6792	2.3336	0.00015	0.000298501	yes
XLOC_011701	XLOC_011701	TcSYL_0166840	TcX10_chr35:225114-225607	DCT	TM	OK	672874	133615	0.989669	2.0233	0.0002	0.000392633	yes
XLOC_002548	XLOC_002548	TcSYL_0092310	TcX10_chr12:984111-985030	DCT	TM	OK	271612	536985	0.983337	2.08391	0.0002	0.000392633	yes
XLOC_008392	XLOC_008392	TcSYL_0141700	TcX10_chr27:39381-40072	DCT	TM	OK	491505	936733	0.930432	2.04034	0.0002	0.000392633	yes
XLOC_007427	XLOC_007427	TcSYL_0131700	TcX10_chr23:561048-561745	DCT	TM	OK	51109	918434	0.845599	1.89904	0.0002	0.000392633	yes
XLOC_014739	XLOC_014739	TcSYL_0043450	TcX10_chr4:1319257-1319642	DCT	TM	OK	227209	384549	0.759146	1.97735	0.0002	0.000392633	yes
XLOC_020226	XLOC_020226	TcSYL_0078740	TcX10_chr9:805428-806062	DCT	TM	OK	991261	167149	0.753801	1.9772	0.0002	0.000392633	yes
XLOC_004431	XLOC_004431	TcSYL_0111310	TcX10_chr16:1072997-1073754	DCT	TM	OK	760638	126471	0.73353	1.91115	0.0002	0.000392633	yes
XLOC_016239	XLOC_016239	TcSYL_0196510	TcX10_chr43:138830-139884	DCT	TM	OK	561451	931026	0.729661	1.95887	0.0002	0.000392633	yes
XLOC_020430	XLOC_020430	TcSYL_0075510	TcX10_chr9:459440-460170	DCT	TM	OK	973511	158475	0.702989	1.9439	0.0002	0.000392633	yes
XLOC_005208	XLOC_005208	TcSYL_0014850	TcX10_chr2:120480-121198	DCT	TM	OK	115665	182181	0.655421	1.84402	0.0002	0.000392633	yes
XLOC_005990	XLOC_005990	TcSYL_0117680	TcX10_chr20:44371-44885	DCT	TM	OK	205436	323394	0.654604	1.89914	0.0002	0.000392633	yes
XLOC_006506	XLOC_006506	TcSYL_0121900	TcX10_chr21:265623-266653	DCT	TM	OK	83152	130837	0.653946	1.91454	0.0002	0.000392633	yes
XLOC_020349	XLOC_020349	TcSYL_0074690	TcX10_chr9:134128-135191	DCT	TM	OK	128012	194983	0.607073	1.96366	0.0002	0.000392633	yes
XLOC_001673	XLOC_001673	TcSYL_0080350	TcX10_chr10:135178-136055	DCT	TM	OK	178224	266812	0.582138	1.94235	0.0002	0.000392633	yes
XLOC_009526	XLOC_009526	TcSYL_0023100	TcX10_chr3:297020-297681	DCT	TM	OK	341834	510964	0.579923	1.97581	0.0002	0.000392633	yes
XLOC_001733	XLOC_001733	TcSYL_0082500	TcX10_chr10:735582-737296	DCT	TM	OK	100041	149483	0.579391	1.99183	0.0002	0.000392633	yes
XLOC_005872	XLOC_005872	TcSYL_0019560	TcX10_chr2:854273-855888	DCT	TM	OK	669895	998152	0.575324	1.82098	0.0002	0.000392633	yes
XLOC_020287	XLOC_020287	TcSYL_0079400	TcX10_chr9:1036386-1037020	DCT	TM	OK	323921	475586	0.554064	1.88103	0.0002	0.000392633	yes
XLOC_009476	XLOC_009476	TcSYL_0022570	TcX10_chr3:45631-46136	DCT	TM	OK	564855	154293	4.77165	5.31432	0.0002	0.000392633	yes
XLOC_017886	XLOC_017886	TcSYL_0057120	TcX10_chr6:942545-944205	DCT	TM	OK	0.891736	162991	4.19203	3.69015	0.0002	0.000392633	yes
XLOC_000492	XLOC_000492	TcSYL_0009860	TcX10_chr1:1961395-1961996	DCT	TM	OK	361523	483361	3.74094	3.47556	0.0002	0.000392633	yes
XLOC_003246	XLOC_003246	TcSYL_0097250	TcX10_chr13:730709-731100	DCT	TM	OK	12691	903131	2.83113	3.5926	0.0002	0.000392633	yes
XLOC_020000	XLOC_020000	TcSYL_0072990	TcX10_chr8:251276-253473	DCT	TM	OK	147775	757034	2.35695	2.47273	0.0002	0.000392633	yes
XLOC_003263	XLOC_003263	TcSYL_0097430	TcX10_chr13:742952-743295	DCT	TM	OK	288415	130.7	2.18004	3.45951	0.0002	0.000392633	yes
XLOC_013210	XLOC_013210	TcSYL_0181960	TcX10_chr39:335658-336094	DCT	TM	OK	195383	817759	2.06537	2.60582	0.0002	0.000392633	yes
XLOC_003308	XLOC_003308	TcSYL_0098050	TcX10_chr13:782977-783377	DCT	TM	OK	201345	83411	2.05057	2.32057	0.0002	0.000392633	yes
XLOC_000787	XLOC_000787	TcSYL_0000640	TcX10_chr1:202798-203363	DCT	TM	OK	201534	62727	1.63806	2.669	0.0002	0.000392633	yes
XLOC_006520	XLOC_006520	TcSYL_0122110	TcX10_chr21:286326-286972	DCT	TM	OK	145916	44252	1.60061	2.41974	0.0002	0.000392633	yes
XLOC_010910	XLOC_010910	TcSYL_0159010	TcX10_chr32:544545-545251	DCT	TM	OK	187731	464363	1.30659	2.08491	0.0002	0.000392633	yes
XLOC_008321	XLOC_008321	TcSYL_0140110	TcX10_chr26:375938-376455	DCT	TM	OK	573936	124837	1.12108	2.27254	0.0002	0.000392633	yes
XLOC_004719	XLOC_004719	TcSYL_0112830	TcX10_chr18:107201-107823	DCT	TM	OK	39631	802742	1.01831	2.0105	0.0002	0.000392633	yes
XLOC_002876	XLOC_002876	TcSYL_0096440	TcX10_chr13:669633-670144	DCT	TM	OK	169482	602323	1.8294	2.70124	0.0002	0.000392633	yes
[truncated: 867 more rows]

## Sheet: DOWN-EP
test_id	gene_id	gene	locus	sample_1	sample_2	status	value_1	value_2	log2(fold_change)	test_stat	p_value	q_value	significant
[truncated: 1,738 more rows]

[truncated: 3 more sheets: UP-EP, DOWN-AM, UP.-AM]
